# Supplementary material for: Multi-omics research on common allergens during the ripening of pollen and poplar flocs of Populus deltoides
Source: Front Plant Sci. 2023 Jun 16;14:1136613. doi: 10.3389/fpls.2023.1136613 (PMC10313134; doi:10.3389/fpls.2023.1136613)
Supplement: Supplementary file 1 [file Table_1.xlsx]

## Sheet: raw data
Accession	Description	Coverage [%]	# Peptides	# PSMs	# Unique Peptides	# AAs	MW [kDa]	calc. pI	Score Sequest HT: Sequest HT	Abundances (Grouped): F1, 126	Abundances (Grouped): F1, 127N	Abundances (Grouped): F1, 127C	Abundances (Grouped): F1, 128N	Abundances (Grouped): F1, 128C	Abundances (Grouped): F1, 129N	Abundances (Grouped): F1, 129C	Abundances (Grouped): F1, 130N	Abundances (Grouped): F1, 130C	Abundances (Grouped): F1, 131N	Abundances (Grouped): F1, 131C	Abundances (Grouped): F1, 132N
A0A2I4GCT0	heat shock cognate 70 kDa protein 2 OS=Juglans regia OX=51240 GN=LOC109006783 PE=3 SV=1	50	29	202	2	650	71.2	5.29	633.19	85.8	81.5	80.8	75.5	76	77.2	119.5	123.8	120.4	120.1	119.9	119.6
A0A2I4F270	heat shock cognate protein 80-like OS=Juglans regia OX=51240 GN=LOC108994817 PE=3 SV=1	41	34	138	3	700	80.1	5.06	439.39	103.6	102.6	99.4	113.4	112.6	114.3	90.6	93.8	94.8	89.6	92.2	93.2
A0A2I4FVE3	Clathrin heavy chain OS=Juglans regia OX=51240 GN=LOC109002362 PE=3 SV=1	31	47	121	14	1705	193	5.39	393.04	79.2	80.5	80.3	72.4	74.4	73.2	132.4	130.8	130.5	113.8	116.3	116.1
A0A6P9EU88	Phosphopyruvate hydratase OS=Juglans regia OX=51240 GN=LOC108979161 PE=3 SV=1	53	22	171	9	445	48	6.47	553.73	82	80.9	80.2	78.7	78.7	79.2	111.3	113.6	113.8	127.4	126.4	127.9
A0A2I4E2C3	heat shock cognate protein 80 OS=Juglans regia OX=51240 GN=LOC108985631 PE=3 SV=1	43	34	131	1	700	80.2	5.03	412.39	100.3	102.9	94.9	106.7	105.4	107.2	94.8	104.1	102.9	93.6	94.3	93
A0A2I4EMF1	cell division cycle protein 48 homolog OS=Juglans regia OX=51240 GN=LOC108990908 PE=4 SV=1	49	37	100	9	806	89.5	5.22	342.09	105.4	106.4	104	99	101.8	103.1	95.7	95.4	95.9	99.3	97.2	96.8
A0A2I4E502	heat shock cognate 70 kDa protein 2-like OS=Juglans regia OX=51240 GN=LOC108986352 PE=3 SV=1	49	28	174	3	650	71.2	5.19	552.1	67.5	71.3	70.6	70.1	65.2	63.5	133.6	129.6	133.5	132	129.2	133.9
A0A2I4FI60	heat shock cognate 70 kDa protein 2-like OS=Juglans regia OX=51240 GN=LOC108999011 PE=3 SV=1	52	30	176	2	653	71.6	5.34	572.35	94.2	94.1	95.1	84.6	87.8	86	111.7	110.4	108.6	113.2	107.8	106.5
A0A6P9DUA2	Clathrin heavy chain OS=Juglans regia OX=51240 GN=LOC108981330 PE=3 SV=1	30	45	119	12	1705	193.3	5.49	369.87	72.7	72.5	71.9	64.9	67	65	137.2	139.1	136.4	122	125.6	125.7
A0A2I4DSU6	Tubulin alpha chain OS=Juglans regia OX=51240 GN=LOC108983125 PE=3 SV=1	63	21	135	1	450	49.5	5.06	397.29	56.9	58.5	57.3	56.9	56.4	56.3	159.2	158.5	153.1	128.3	127.5	131.2
A0A2I4E863	elongation factor 2-like isoform X1 OS=Juglans regia OX=51240 GN=LOC108987170 PE=3 SV=1	37	30	127	3	843	93.8	6.29	386.55	109.7	106.3	106.5	97.4	95.4	98.2	93	96.5	96.4	98.5	98.7	103.5
A0A2I4E858	elongation factor 2 OS=Juglans regia OX=51240 GN=LOC108987171 PE=3 SV=1	33	29	135	2	843	93.9	6.11	389.97	107.4	116.4	107	96.6	96.2	93.5	98.7	101.7	99.2	93.9	96	93.4
A0A6P9ET71	actin-1 OS=Juglans regia OX=51240 GN=LOC109015564 PE=3 SV=1	60	18	258	2	377	41.6	5.49	813.08	164.2	160.8	158.5	156.3	153.6	153.3	50.4	43.6	53.7	34	37.5	34.1
A0A2I4GLH4	actin-7 OS=Juglans regia OX=51240 GN=LOC109008915 PE=3 SV=1	60	18	242	4	377	41.7	5.49	751.91	106.7	107.5	104.3	101.6	102.8	103.1	105.1	105.8	105.9	85	85.2	87
A0A2I4EV32	heat shock 70 kDa protein 4-like OS=Juglans regia OX=51240 GN=LOC108992981 PE=3 SV=1	48	27	156	3	649	71.1	5.29	509	100.2	101.4	99.7	95.3	95.5	96.2	101.3	95.3	98.2	109.5	103.4	103.9
A0A2I4G301	V-type proton ATPase catalytic subunit A OS=Juglans regia OX=51240 GN=LOC109004247 PE=3 SV=1	45	22	106	22	623	68.6	5.58	362.62	88.5	89.3	86.8	87	85.2	86	119	116.9	115.6	107.3	108.7	109.6
A0A2I4E507	actin-97 OS=Juglans regia OX=51240 GN=LOC108986355 PE=3 SV=1	58	17	214	1	377	41.7	5.49	703.23	162.9	159.6	158.8	139.1	137.6	142.5	55	54.7	57	44.1	44.3	44.4
A0A2I4H0S0	ATP synthase subunit beta OS=Juglans regia OX=51240 GN=LOC109012510 PE=3 SV=2	44	17	111	16	559	59.8	6.06	397.31	109	111.7	107.6	121.7	120.9	121.1	84.5	83.4	85.8	84.8	84	85.6
A0A2I4E334	Tubulin alpha chain OS=Juglans regia OX=51240 GN=LOC108985820 PE=3 SV=1	55	19	129	1	450	49.5	5.1	377.31	94	122.4	127.6	126.3	70.8	102.3	100.2	61.7	97.6	92.6	86.6	117.9
A0A2I4FU77	endoplasmic reticulum chaperone BiP OS=Juglans regia OX=51240 GN=LOC109002071 PE=3 SV=1	45	29	143	26	666	73.4	5.25	464.02	112.9	114.4	113.8	118.1	119	119.7	80.5	81.9	82.3	88	84.1	85.2
A0A6P9EE16	cell division cycle protein 48 homolog OS=Juglans regia OX=51240 GN=LOC118344489 PE=4 SV=1	40	32	84	4	805	89.4	5.31	278.56	114.1	116.2	114.9	113.2	108	113.5	81.7	85.5	85.8	85.1	92.1	90
A0A6P9E986	Elongation factor 1-alpha OS=Juglans regia OX=51240 GN=LOC108989630 PE=3 SV=1	60	20	208	3	447	49.3	9.09	606.35	105	102.6	105.2	93.7	95.4	95.5	100.4	100	99.4	102	100.8	99.9
A0A2I4H6T0	5-methyltetrahydropteroyltriglutamate--homocysteine S-methyltransferase OS=Juglans regia OX=51240 GN=LOC109014008 PE=3 SV=1	30	21	179	10	814	90.4	7.25	496.17	93.1	94	94.5	83	84	87.3	93.6	93.7	94.6	124.7	128.7	128.8
A0A2I4DU74	UDP-glucuronate decarboxylase OS=Juglans regia OX=51240 GN=LOC108983505 PE=3 SV=1	53	16	115	1	346	38.9	7.55	372.17	49.8	49.4	48.3	49.5	50.4	50.1	146.2	146.6	143.2	155.7	154.3	156.5
A0A2I4GJI5	Adenosylhomocysteinase OS=Juglans regia OX=51240 GN=LOC109008436 PE=3 SV=1	42	21	266	7	485	53	6.1	739.92	101.6	101.5	99.3	92.2	93	92.5	95.8	95.3	96	111.6	111.1	110.1
A0A2I4GZN8	Phosphoenolpyruvate carboxylase OS=Juglans regia OX=51240 GN=LOC109012286 PE=3 SV=1	37	33	89	6	965	110.4	6.23	280.88	93.4	94.7	96.1	93.4	92.7	93.3	107.9	109.3	107.8	103.2	104.5	103.7
A0A2I4FGF9	Tubulin beta chain OS=Juglans regia OX=51240 GN=LOC108998602 PE=3 SV=2	67	20	116	2	447	50.2	4.82	348.72	89.4	92.6	93.3	93.9	92.3	94.7	111.4	114.8	111.9	99.5	102.8	103.2
A0A2I4G6H5	Phosphopyruvate hydratase OS=Juglans regia OX=51240 GN=LOC109005160 PE=3 SV=1	35	16	121	3	444	47.8	5.97	415.5	97.2	107.2	119.2	96.7	109.1	102.3	96.7	95.1	89	102.2	94.9	90.4
A0A6P9EPU5	Plasma membrane ATPase OS=Juglans regia OX=51240 GN=LOC108990175 PE=3 SV=1	32	28	68	6	956	105.2	6.7	233.25	83.7	85.5	83.9	77.6	77.5	78.4	120.9	121.7	119.2	116.9	117.8	116.9
A0A2I4GE07	actin-7-like OS=Juglans regia OX=51240 GN=LOC109007071 PE=3 SV=1	46	14	181	1	376	41.5	5.49	581.02	172.9	156.8	154.1	138.2	151.3	139.9	52.7	53.2	57.4	41.7	41.1	40.8
A0A833XZK6	Tubulin beta chain (Fragment) OS=Juglans regia OX=51240 GN=F2P56_006199 PE=3 SV=1	57	20	127	6	511	57.4	5	347.36	52.6	53	53.6	53.6	54.7	54.6	163.8	162.5	159.1	130.3	129.9	132.2
A0A2I4H8J6	Tubulin beta chain OS=Juglans regia OX=51240 GN=LOC109014450 PE=3 SV=1	61	18	118	1	446	50.2	4.83	347.39	42.4	46.5	45	43.5	44.3	46.7	164.2	165.5	171.3	137.9	145.5	147
A0A2I4FQF7	S-adenosylmethionine synthase OS=Juglans regia OX=51240 GN=LOC109001162 PE=3 SV=1	60	18	96	5	393	43	6.05	351.12	137.3	137.3	140.3	140.6	143	146.5	51.4	51.9	56.4	64	66	65.2
A0A2I4FIY0	Plasma membrane ATPase OS=Juglans regia OX=51240 GN=LOC108999219 PE=3 SV=1	28	26	66	2	956	105.3	6.68	229.43	55.4	60.3	59.8	63.2	60.5	50.9	143.4	142.6	143.6	137.6	151.6	131.2
A0A2I4FXS2	Tubulin beta chain OS=Juglans regia OX=51240 GN=LOC109002963 PE=3 SV=1	61	18	93	1	447	50.4	4.86	298.26	78.6	79.2	71.9	82.7	83.1	79.5	103.2	102.4	103.7	141.8	130	143.9
A0A2I4HMQ2	Tubulin beta chain OS=Juglans regia OX=51240 GN=LOC109019574 PE=3 SV=1	55	17	110	1	444	49.9	4.93	323.93	103.5	107.6	105.6	101.3	97.3	97.1	116.9	116.6	116.7	80.5	77.9	79.1
A0A6P9E812	Coatomer subunit alpha OS=Juglans regia OX=51240 GN=LOC108986960 PE=4 SV=1	33	32	75	6	1218	136.4	6.99	245.59	102	101.8	100.1	92.3	91.5	90.4	106.1	105.3	106.1	102.3	101.4	100.8
A0A833X597	Tubulin beta chain (Fragment) OS=Juglans regia OX=51240 GN=F2P56_020539 PE=3 SV=1	60	19	98	1	470	53	5.2	306.14	65.1	62.4	63.1	67	65	63.9	154.6	157.7	158.6	113.6	117.1	111.9
A0A2I4HDZ0	Plasma membrane ATPase OS=Juglans regia OX=51240 GN=LOC109016418 PE=3 SV=1	28	26	71	6	954	105.1	6.92	235.97	83.3	81.9	78.9	85.2	85.2	85.1	104.7	112.7	109.9	124	123.8	125.3
A0A6P9ESY1	eukaryotic initiation factor 4A-15-like OS=Juglans regia OX=51240 GN=LOC109009115 PE=4 SV=1	28	23	107	3	801	88.9	6	305.01	117.9	118.5	116.2	112.3	115.8	114.6	86.1	86.4	87.4	80.7	82.2	81.8
A0A2I4G145	5-methyltetrahydropteroyltriglutamate--homocysteine S-methyltransferase OS=Juglans regia OX=51240 GN=LOC109003782 PE=3 SV=1	34	22	160	6	765	84.6	7.17	429.28	109.4	110.7	109.7	93.7	94.7	95.2	80.1	81.7	81.7	115.1	114.3	113.6
A0A2I4ET10	Phosphoenolpyruvate carboxylase OS=Juglans regia OX=51240 GN=LOC108992417 PE=3 SV=1	33	31	78	3	965	110.2	6.13	244.61	100.7	97.2	98.1	91	90.9	93.1	107.1	111.8	108.9	101.1	98.4	101.6
A0A2I4E4Z9	UDP-glucuronate decarboxylase OS=Juglans regia OX=51240 GN=LOC108986350 PE=3 SV=1	53	16	105	1	346	38.8	7.23	317.63	20.6	19.8	30.1	22	29	28.7	149.3	173.2	150.5	179.5	199.3	198.1
A0A2I4GLC6	eukaryotic initiation factor 4A-2 OS=Juglans regia OX=51240 GN=LOC109008881 PE=3 SV=1	50	19	106	3	413	46.7	5.48	304.97	94.8	92.3	106.6	97.5	98.1	105.7	102.7	94.4	104.4	91.5	106.5	105.4
A0A2I4FL34	S-adenosylmethionine synthase OS=Juglans regia OX=51240 GN=LOC108999916 PE=3 SV=1	55	17	94	4	393	43.3	6	305.73	110.9	107.4	108	121	125	125.5	70.2	70.5	72.1	95.5	96	97.8
A0A2I4DF35	Elongation factor 1-alpha OS=Juglans regia OX=51240 GN=LOC109018672 PE=3 SV=1	55	19	192	2	447	49.3	9.03	538.87	115.9	119	120.2	102.2	102.6	105.2	90.9	89	90.1	86.5	89.9	88.4
A0A2I4GD24	26S proteasome regulatory subunit 6A homolog OS=Juglans regia OX=51240 GN=LOC109006847 PE=3 SV=1	65	28	64	6	423	47.5	5.11	193.56	95	92.9	96.9	101.2	97.5	99.8	106.5	107.9	108.2	96.7	97.6	99.7
A0A2I4GC63	Vacuolar proton pump subunit B OS=Juglans regia OX=51240 GN=LOC109006618 PE=3 SV=1	40	15	55	15	488	54.3	5.15	211.68	92.3	92.6	89.3	91.4	90.7	91	115.2	118.4	115.6	100.2	101.3	101.9
A0A2I4FSB7	Tubulin alpha chain OS=Juglans regia OX=51240 GN=LOC109001644 PE=3 SV=1	52	18	86	2	449	49.6	5.1	242.98	56.4	58.3	59.5	58.4	58.8	54.2	164.8	169.4	161.3	120.5	115.8	122.5
A0A2I4G8U2	Coatomer subunit alpha OS=Juglans regia OX=51240 GN=LOC109005730 PE=4 SV=1	28	30	73	4	1219	136.8	7.06	223.16	103.7	108.7	105.6	90.7	91.2	90.3	114.5	111.2	102.9	105.2	89.8	86.3
A0A2I4FTZ0	eukaryotic initiation factor 4A-15 OS=Juglans regia OX=51240 GN=LOC109002014 PE=3 SV=1	45	19	91	2	413	46.7	5.69	247.1	131.9	121.7	132	121.8	125.2	125.8	72.2	67.4	71.2	76.1	78.8	76
A0A2I4EL14	Tubulin alpha chain OS=Juglans regia OX=51240 GN=LOC108990543 PE=3 SV=1	49	17	96	1	449	49.6	5.14	273.3	88.4	95.9	111.9	115	109.5	101	89.7	101.5	66	119.7	104.4	97.1
A0A833XHN0	Coatomer subunit beta' OS=Juglans regia OX=51240 GN=F2P56_016564 PE=3 SV=1	26	21	68	3	907	102.5	5.14	202.76	93.2	92.9	93.3	81.2	83.1	84.4	115.9	114.6	113.6	108.5	109.3	110.1
A0A2I4FBX7	Beta-adaptin-like protein OS=Juglans regia OX=51240 GN=LOC108997380 PE=3 SV=1	30	25	52	25	905	100.2	5.08	164.48	84.4	85.5	85.8	79.6	83.5	83.7	124.6	123.1	125.1	106.8	109.5	108.3
A0A2I4GY66	trifunctional UDP-glucose 4,6-dehydratase/UDP-4-keto-6-deoxy-D-glucose 3,5-epimerase/UDP-4-keto-L-rhamnose-reductase RHM1 OS=Juglans regia OX=51240 GN=LOC109011912 PE=4 SV=1	34	16	71	4	671	75.5	6.98	221.06	145.2	143.3	143.6	138.8	134.9	137.9	60.7	58.3	64.7	56.1	57.3	59.4
A0A2I4FP75	Tubulin beta chain OS=Juglans regia OX=51240 GN=LOC109000886 PE=3 SV=1	47	16	82	3	519	57.8	4.98	241.86	102.3	99.3	105.5	131.6	129.2	127.9	85.7	82.3	85.1	81.6	85.1	84.2
A0A2I4GR69	Glyceraldehyde-3-phosphate dehydrogenase OS=Juglans regia OX=51240 GN=LOC109010118 PE=3 SV=2	53	14	126	5	337	36.7	7.18	392.57	109.5	109	107.3	100.3	104.2	104.1	90.3	92	90.3	99.6	97.7	95.7
A0A2I4HTW7	26S proteasome regulatory subunit 7A OS=Juglans regia OX=51240 GN=LOC109021415 PE=3 SV=1	63	24	76	24	426	47.7	6.29	212.01	98.4	96.8	95.9	104.3	102.4	100.9	102.4	101.5	100.6	98.4	99.7	98.7
A0A6P9EIL2	Plasma membrane ATPase OS=Juglans regia OX=51240 GN=LOC109019497 PE=3 SV=1	28	22	57	4	952	104.6	6.52	175.68	156.7	152.1	152	136.6	133.1	140.2	45.5	42.8	46.9	62.1	66.2	65.9
A0A2I4GA16	26S proteasome regulatory subunit 4 homolog B-like OS=Juglans regia OX=51240 GN=LOC109006061 PE=3 SV=1	53	22	49	22	445	49.5	6.21	162.95	101	98.4	99.8	105.5	103.2	105.5	101	101.3	103.8	92	94.4	94.3
A0A2I4FMM5	S-adenosylmethionine synthase OS=Juglans regia OX=51240 GN=LOC109000474 PE=3 SV=1	62	17	83	3	393	43.1	6.18	264.56	86.6	83.5	83.8	87.6	86	84.6	87.2	88.6	86.6	141.3	137.5	146.8
A0A2I4G0I3	ruBisCO large subunit-binding protein subunit beta, chloroplastic OS=Juglans regia OX=51240 GN=LOC109003624 PE=3 SV=1	33	16	43	16	608	64.6	5.67	153.66	66.9	66.6	65.9	87	88.8	86.8	108.6	111.9	107.6	139.8	134.9	135.3
A0A6P9E2B8	UDP-glucuronate decarboxylase OS=Juglans regia OX=51240 GN=LOC109008364 PE=3 SV=1	45	14	80	2	346	39.1	6.87	244.49	38.4	34.2	41.6	33.6	26.9	36.1	158.7	169	146.4	175.4	168.2	171.6
A0A2I4HPL3	ATP citrate synthase OS=Juglans regia OX=51240 GN=LOC109020139 PE=4 SV=1	29	16	78	16	608	65.8	7.69	227.88	95.5	96	96.9	87.7	89.4	90	107.3	106.1	106.1	110	108	107
A0A2I4FY71	chaperone protein ClpC, chloroplastic OS=Juglans regia OX=51240 GN=LOC109003075 PE=3 SV=1	29	23	45	23	924	102.6	6.89	130.54	94.5	93.9	91.9	102.7	102.3	102	96.6	98.3	98.2	105.1	106.3	108.1
A0A6P9EKB8	26S proteasome regulatory subunit S10B homolog B OS=Juglans regia OX=51240 GN=LOC109008270 PE=3 SV=1	57	17	60	2	398	44.6	8.62	181.1	90.9	91.2	92.3	98.2	99.1	98.2	111.4	110.4	109.1	98.3	100.3	100.6
A0A2I4F994	Coatomer subunit beta OS=Juglans regia OX=51240 GN=LOC108996664 PE=4 SV=1	22	22	45	13	948	105.8	5.97	135.33	111	109.8	109.4	100	103	99.3	99.4	101.7	104.1	87.8	87.1	87.3
A0A2I4FDZ0	5-methyltetrahydropteroyltriglutamate--homocysteine S-methyltransferase OS=Juglans regia OX=51240 GN=LOC108997930 PE=3 SV=1	24	17	134	2	765	84.7	7.18	342.17	82.3	61.6	76.3	70.9	66.8	65.8	91.2	96.9	89.2	182.9	153.7	162.4
A0A6P9ENZ0	6-phosphogluconate dehydrogenase, decarboxylating OS=Juglans regia OX=51240 GN=LOC108988183 PE=3 SV=1	33	16	59	2	488	53.8	7.09	197.76	91.4	93.6	94.6	91.7	92.7	92.9	105.8	106.7	107.9	104.7	109.8	108.4
A0A2I4EEK7	stromal 70 kDa heat shock-related protein, chloroplastic-like OS=Juglans regia OX=51240 GN=LOC108988901 PE=3 SV=1	36	22	55	13	705	75.2	5.49	158.73	89.1	89.5	92.8	96	96.1	96	103	101.5	104.1	110.2	111.2	110.5
A0A2I4EGL9	6-phosphogluconate dehydrogenase, decarboxylating OS=Juglans regia OX=51240 GN=LOC108989414 PE=3 SV=1	35	18	61	4	485	53.7	8.22	199.26	95.1	93.8	93.9	95.5	95	95.4	99.1	99.9	98	112.4	109.5	112.4
A0A6P9EC57	UDP-glucose 6-dehydrogenase OS=Juglans regia OX=51240 GN=LOC108999461 PE=3 SV=1	43	16	74	2	480	52.8	6.47	229	112.6	113.6	113.5	108.7	111.3	108.5	88.9	88.4	88	90.3	88	88.2
A0A2I4H3R0	Glutamate synthase (NADH) OS=Juglans regia OX=51240 GN=LOC109013214 PE=3 SV=1	15	29	46	6	2222	244.2	6.9	130.93	104.5	108.4	109.2	101.2	97.4	98.9	81.3	80.6	82.4	111.8	111.3	112.9
A0A2I4GXB8	Adenosylhomocysteinase OS=Juglans regia OX=51240 GN=LOC109011698 PE=3 SV=1	37	17	208	3	485	53.2	5.88	528.23	102.6	101.6	101.8	89.1	88	100.8	97.3	98.6	97.3	102.9	113.5	106.5
A0A833T5F8	Coatomer subunit beta' OS=Juglans regia OX=51240 GN=F2P56_028091 PE=3 SV=1	25	20	66	2	912	102.8	5.06	190.74	79.5	84.2	85.1	83	80.6	81.3	113.5	115.4	101.2	120.3	126.2	129.7
A0A2I4DN90	Phosphoenolpyruvate carboxylase OS=Juglans regia OX=51240 GN=LOC108981819 PE=3 SV=1	26	25	64	5	965	110.1	6.44	186.33	87.8	87.9	91.2	89.7	91.2	90.2	108.6	105.8	111.4	109.2	109.8	117.1
A0A2I4H1K8	26S proteasome regulatory subunit 6A homolog OS=Juglans regia OX=51240 GN=LOC109012707 PE=3 SV=1	57	23	51	1	423	47.5	5.29	158.26	101.9	116.5	101.4	78.3	75.2	87	109.7	115.4	127.3	90.1	95.1	102.1
A0A2I4DLR7	heat shock 70 kDa protein OS=Juglans regia OX=51240 GN=LOC108981403 PE=3 SV=1	28	16	94	2	647	70.8	5.47	278.43	107.8	107	106.2	100	99.1	93	97.5	91.1	94.5	110	93	100.7
A0A2I4ES79	Aspartate aminotransferase OS=Juglans regia OX=51240 GN=LOC108992218 PE=3 SV=1	45	18	45	17	464	50.5	8.78	149.61	111	113.6	109.8	117.7	113.4	113.7	88.6	91.5	91.2	82.9	83	83.7
A0A2I4HPV3	Pyruvate kinase OS=Juglans regia OX=51240 GN=LOC109020107 PE=3 SV=1	50	19	47	16	510	55.3	7.33	127	79.8	78.5	79.1	72.8	72.7	72.8	124.4	124.2	122.2	123.7	124	125.6
A0A2I4EA93	Plasma membrane ATPase OS=Juglans regia OX=51240 GN=LOC108987764 PE=3 SV=2	19	17	42	1	951	104.2	7.47	154.65	162.2	158.1	161	158.9	147.2	154.8	37.7	38.6	47.4	41.5	47.7	44.8
A0A2I4EBN8	Isocitrate dehydrogenase [NADP] OS=Juglans regia OX=51240 GN=LOC108988131 PE=3 SV=1	43	19	61	9	412	46.1	7.23	192.01	100.8	101.4	98.7	93.3	95	93.6	99.1	97.8	98.9	106.9	106.2	108.3
A0A6P9EES9	Glutamate synthase (NADH) OS=Juglans regia OX=51240 GN=LOC109004582 PE=3 SV=1	15	26	40	3	1897	208.4	6.35	121.28	112.3	114	112.7	104.4	105.6	100.4	76.9	82.4	79.9	107.6	99.7	104.2
A0A2I4DSA3	Oxoglutarate dehydrogenase (succinyl-transferring) OS=Juglans regia OX=51240 GN=LOC108982983 PE=3 SV=1	25	20	49	8	1021	115.6	6.79	166.15	105.4	106	109.4	111	105.2	107.3	99.8	97.7	99.9	85.7	86.8	85.8
A0A2I4GEC5	Biotin carboxylase OS=Juglans regia OX=51240 GN=LOC109007141 PE=4 SV=1	39	14	36	14	519	57.1	7.28	131.64	94.8	91.3	89.7	95	93.8	91.9	110.2	111.8	112.8	101.5	101.4	105.7
A0A2I4H5F8	ADP-ribosylation factor OS=Juglans regia OX=51240 GN=LOC109013677 PE=3 SV=1	60	11	57	11	181	20.7	6.95	186.8	103.6	104.9	100.7	95.5	92.5	92.9	112.9	112.3	112.3	90	89.7	92.7
A0A2I4DIC6	Plasma membrane ATPase OS=Juglans regia OX=51240 GN=LOC108980431 PE=3 SV=1	22	18	47	3	954	105	7.4	144.51	132.5	143	143.9	138	131.3	130.1	63.1	58.9	65.3	65.2	68.4	60.3
A0A2I4FPU9	Plasma membrane ATPase OS=Juglans regia OX=51240 GN=LOC109001016 PE=3 SV=1	23	19	52	1	952	104.4	6.3	158.51	129.5	136.3	109.2	124.5	127.1	124.8	67.8	71	74.4	73	76.8	85.6
A0A2I4E7E6	26S proteasome regulatory subunit S10B homolog B-like OS=Juglans regia OX=51240 GN=LOC108986965 PE=3 SV=1	54	16	49	1	399	44.6	8.19	138.87	95.9	100.2	105	101.4	102.3	93.4	103.4	105.4	97.2	101.5	92.1	102.3
A0A2I4GMF6	Guanosine nucleotide diphosphate dissociation inhibitor OS=Juglans regia OX=51240 GN=LOC109009133 PE=3 SV=1	30	13	52	4	444	49.8	5.86	158.33	146.1	142.2	141.8	133.4	134.9	133.2	58.8	58	60.9	63.9	63.1	63.6
A0A2I4GGP4	Pyrophosphate--fructose 6-phosphate 1-phosphotransferase subunit alpha OS=Juglans regia OX=51240 GN=LOC109007722 PE=3 SV=1	29	14	43	14	617	67.7	7.09	145.22	33.4	33.4	34.1	32.7	33.7	32.4	155.4	158.2	150.2	182.2	175.5	178.8
A0A2I4DY26	CCT-beta OS=Juglans regia OX=51240 GN=LOC108984519 PE=3 SV=1	27	12	44	12	527	57.3	5.91	138.12	98.3	95.1	97.7	101	99.9	103.3	98.4	97	103.2	101.3	102.8	102
A0A2I4GJJ1	Serine hydroxymethyltransferase OS=Juglans regia OX=51240 GN=LOC109008438 PE=3 SV=1	31	14	62	13	471	51.8	7.69	195.58	95.9	95.3	95.3	99.4	97.2	99.7	91.1	91.1	90.5	114.1	115.3	115
A0A2I4DSK6	Plasma membrane ATPase OS=Juglans regia OX=51240 GN=LOC108983058 PE=3 SV=1	14	15	41	4	950	104.5	5.59	136.07	52.3	50.5	52.3	65	61.8	61.9	128.2	138.2	122.1	154.4	156.1	157.1
A0A2I4DFK2	Pyruvate kinase OS=Juglans regia OX=51240 GN=LOC108979677 PE=3 SV=1	43	20	61	4	527	57.2	6.76	175.39	112.7	108.5	112.1	93.9	97.6	98.6	97.9	97.7	98.3	93.1	96.2	93.4
A0A2I4HV21	Glyceraldehyde-3-phosphate dehydrogenase OS=Juglans regia OX=51240 GN=LOC109021727 PE=3 SV=1	35	11	96	2	337	36.6	7.58	290.92	75.6	77.1	82	69	72	74.7	120.9	114.9	114.8	147.3	125.6	126
A0A2I4DN63	14-3-3-like protein OS=Juglans regia OX=51240 GN=LOC108981796 PE=3 SV=1	42	13	95	5	263	29.4	4.79	264.45	89.2	87.8	85.6	83.1	82.6	83.2	115.5	118.9	115.5	113.4	112.4	112.7
A0A2I4F537	H(+)-exporting diphosphatase OS=Juglans regia OX=51240 GN=LOC108995630 PE=3 SV=1	18	15	54	3	768	80.1	5.57	176.05	100.9	99.2	100.9	91.6	92.6	90.1	109.1	108.6	109.3	101.1	97.3	99.3
A0A2I4GVC4	Coatomer subunit gamma OS=Juglans regia OX=51240 GN=LOC109011194 PE=3 SV=2	19	17	42	3	887	98.4	5.21	141.43	105.9	104.6	103.8	99.4	101.1	100.9	101.2	101.3	101.9	93.1	94.8	91.9
A0A6P9E2K8	serine/threonine-protein phosphatase 2A 65 kDa regulatory subunit A beta isoform OS=Juglans regia OX=51240 GN=LOC109013629 PE=4 SV=1	30	14	37	3	587	65.6	5	136.63	98.7	97.2	100.6	96	97	96.8	104.8	104.9	103.6	98.7	100.9	100.9
A0A2I4FZ04	trifunctional UDP-glucose 4,6-dehydratase/UDP-4-keto-6-deoxy-D-glucose 3,5-epimerase/UDP-4-keto-L-rhamnose-reductase RHM1-like OS=Juglans regia OX=51240 GN=LOC109003254 PE=4 SV=1	35	17	58	8	678	76.2	6.46	168.69	156.6	156.9	156.1	152.1	149.6	151.2	44.9	46.7	50	45.8	44.2	46
A0A2I4EGG7	UDP-glucose 6-dehydrogenase OS=Juglans regia OX=51240 GN=LOC108989380 PE=3 SV=2	37	14	63	1	480	52.7	6.65	208.67	112.6	109.3	111.7	121.9	102.8	120.2	87.1	92	79.9	80.1	93.2	89.2
A0A833XJA7	Plasma membrane ATPase OS=Juglans regia OX=51240 GN=F2P56_016721 PE=3 SV=1	16	15	48	0	954	104.9	6.79	152.64
A0A2I4E030	Glucose-6-phosphate isomerase OS=Juglans regia OX=51240 GN=LOC108985058 PE=3 SV=1	29	17	38	17	625	68.5	5.72	127.76	78.8	80.1	77.2	82.3	83.2	83	118.2	118.2	117.1	120.7	122.4	118.8
A0A6P9DXF3	Glutamine synthetase OS=Juglans regia OX=51240 GN=LOC108988513 PE=3 SV=1	24	9	36	7	356	39.1	6.07	135.01	154.5	154.6	147.8	152.6	154.5	150.2	38.6	40.6	46.9	53.8	52.1	53.7
A0A2I4EB69	NADH dehydrogenase [ubiquinone] iron-sulfur protein 1, mitochondrial OS=Juglans regia OX=51240 GN=LOC108988010 PE=3 SV=1	30	14	40	14	746	81.2	6.57	134.67	102.5	101	99.5	113.1	113.4	110.2	93.8	94.9	95.4	93	90.4	92.9
A0A2I4E7Q2	ruBisCO large subunit-binding protein subunit alpha OS=Juglans regia OX=51240 GN=LOC108987030 PE=3 SV=1	30	15	43	14	585	61.6	5.1	132.16	63.3	61.5	62	78.2	77.5	76.3	118.8	118.8	117.3	143.7	141.3	141.1
A0A2I4GVF1	26S proteasome regulatory subunit 8 homolog A-like OS=Juglans regia OX=51240 GN=LOC109011222 PE=3 SV=1	51	21	47	20	420	47.3	8.6	142.35	96.7	96.9	97.6	99.2	97.5	98.6	106.1	105.6	106.9	97.2	98.7	99
A0A2I4HD87	T-complex protein 1 subunit alpha OS=Juglans regia OX=51240 GN=LOC109016030 PE=3 SV=1	31	15	55	15	546	59	5.9	147.41	96.4	95.9	94.3	88.4	88.7	91	109.1	110.8	108	107	106.2	104.4
A0A2I4G0P9	CCT-eta OS=Juglans regia OX=51240 GN=LOC109003684 PE=3 SV=1	34	16	33	16	562	60.6	6.48	110.66	95	96.5	94	93.4	91.8	93.2	104.4	103.7	103.4	108	107.8	108.7
A0A834D9W6	Uncharacterized protein (Fragment) OS=Juglans regia OX=51240 GN=F2P56_000669 PE=3 SV=1	35	16	41	6	566	62.3	6.86	139.74	102.8	104.8	102	95.8	97	96.4	99.9	101.3	99.8	99.1	100.4	100.8
A0A2I4GQV9	heat shock 70 kDa protein, mitochondrial-like OS=Juglans regia OX=51240 GN=LOC109010035 PE=3 SV=1	23	18	46	2	682	73.2	5.92	137.85	105.1	105.6	103.6	120.3	123.3	121.5	89	90.5	87.3	86.3	83.5	84
A0A834CPD5	Uncharacterized protein (Fragment) OS=Juglans regia OX=51240 GN=F2P56_016796 PE=4 SV=1	69	13	93	6	186	21.1	4.58	266.64	83.5	83.4	82.5	94.5	94.6	95.8	105.2	111.5	110.2	113.5	111.2	114
A0A2I4DQV3	Phosphoenolpyruvate carboxylase OS=Juglans regia OX=51240 GN=LOC108982573 PE=3 SV=1	15	17	53	1	1048	117.8	6.68	141.94	166.3	168.6	168.9	153.5	150.2	151.8	38.8	39.2	41.8	40.9	40.3	39.6
A0A833WU69	CYTOSOL_AP domain-containing protein (Fragment) OS=Juglans regia OX=51240 GN=F2P56_034735 PE=3 SV=1	19	10	47	3	576	60.4	7.87	138.22	67.3	64.5	64	66.7	66.4	66.9	128.7	130.8	129.6	139	136.1	140
A0A2I4DWA3	cytochrome c1-2, heme protein, mitochondrial OS=Juglans regia OX=51240 GN=LOC108984043 PE=4 SV=1	26	6	37	6	307	33.9	6.8	140.05	115.7	117.5	115.9	117.3	113.1	119.9	82.5	82.1	84.9	82.3	83.9	85
A0A2I4DJJ5	Aconitate hydratase OS=Juglans regia OX=51240 GN=LOC108980770 PE=3 SV=1	22	17	46	7	900	98.6	6.3	127.04	119.9	120.6	118.8	106	107.5	106.3	86.4	85	86.5	87.3	88.7	86.9
A0A2I4DWC2	Isocitrate dehydrogenase [NADP] OS=Juglans regia OX=51240 GN=LOC108984074 PE=3 SV=1	41	16	48	3	411	46	6.99	146.37	95.1	94.5	94.9	88.5	86.5	91.4	103.9	102.6	103	111	113.3	115.4
A0A2I4HLD1	S-adenosylmethionine synthase OS=Juglans regia OX=51240 GN=LOC109019125 PE=3 SV=1	41	13	63	3	390	42.7	6.48	201.88	162.3	157.3	169.8	175.3	178.1	179	20.6	20.9	29.2	34.2	37.6	35.7
A0A833WSS4	NADH dehydrogenase [ubiquinone] flavoprotein 1, mitochondrial OS=Juglans regia OX=51240 GN=F2P56_036076 PE=3 SV=1	33	16	41	16	526	58.1	8.31	120.33	93	92.8	92.2	105.6	107	105.6	99.8	99.2	99.1	101	102.7	102
A0A2I4DQB2	serine/threonine-protein phosphatase 2A 65 kDa regulatory subunit A beta isoform-like OS=Juglans regia OX=51240 GN=LOC108982416 PE=4 SV=1	27	13	32	2	587	65.6	5.03	112.74	98.1	106.6	91.2	93.5	95.7	94.9	105.8	101.5	107.4	104.1	98.8	102.4
A0A2I4G611	Guanosine nucleotide diphosphate dissociation inhibitor OS=Juglans regia OX=51240 GN=LOC109005027 PE=3 SV=1	30	11	53	2	444	49.8	5.81	160.91	120.8	134.6	120.1	110.9	116.9	100.5	88.9	86.8	84.5	87.3	75.4	73.1
A0A2I4FCH9	Tubulin beta chain OS=Juglans regia OX=51240 GN=LOC108997485 PE=3 SV=1	41	14	55	6	442	49.6	5.01	157.31	48.5	38.1	48.1	40.6	46.5	39	197.1	182.2	195.3	115.2	128.9	120.5
A0A2I4EGY4	UDP-arabinopyranose mutase OS=Juglans regia OX=51240 GN=LOC108989488 PE=3 SV=1	34	14	74	1	363	41.1	5.73	217.68	158.7	159.6	155	155.1	155.1	153.7	38.1	38.4	43	48.4	47.2	47.7
A0A833TAG3	Methyltransferase (Fragment) OS=Juglans regia OX=51240 GN=F2P56_035879 PE=3 SV=1	34	20	46	18	620	70	7.21	132.89	147	145.8	144.2	145	143.9	141.4	58.1	57.2	62.6	51.1	51.1	52.8
A0A2I4G7Q9	H(+)-exporting diphosphatase OS=Juglans regia OX=51240 GN=LOC109005438 PE=3 SV=1	21	15	44	3	763	80.3	5.49	143.96	104.8	111.4	102.7	106.2	108.8	101.7	84.1	98.5	107.9	88.1	96.5	89.3
A0A2I4FZ49	Coatomer subunit gamma OS=Juglans regia OX=51240 GN=LOC109003294 PE=3 SV=1	17	15	37	1	887	98.7	5.16	122.03	95.4	89.6	94.8	99.9	88	94.5	114.6	97.9	95.5	100.4	106	123.5
A0A2I4DL36	60S ribosomal protein L23 OS=Juglans regia OX=51240 GN=LOC108981199 PE=3 SV=1	66	10	49	10	140	15	10.48	136.93	120.7	121.4	117	120.8	120	119.8	56.1	57	58.8	104.2	103.4	100.8
A0A2I4FX27	Pyruvate kinase OS=Juglans regia OX=51240 GN=LOC109002762 PE=3 SV=1	36	16	49	1	527	57.3	6.86	149.83	108.6	105.9	113.2	105	101.7	98.3	90.4	89.7	95.6	94.2	100.8	96.5
A0A6P9ENN3	ras-related protein RABB1c OS=Juglans regia OX=51240 GN=LOC108996519 PE=4 SV=1	75	14	31	7	211	23.2	7.42	103.79	99.1	99	100.3	92.8	93.9	93.9	116.9	115.8	117.8	89.8	90.1	90.5
A0A2I4G1S7	Phosphoglucomutase (alpha-D-glucose-1,6-bisphosphate-dependent) OS=Juglans regia OX=51240 GN=LOC109003961 PE=3 SV=1	28	13	70	2	583	63.9	5.72	195.44	132	126.2	131.4	149.8	141	133.8	56.1	60.8	61.9	67.7	69.8	69.4
A0A6P9E3H4	Phosphoglucomutase (alpha-D-glucose-1,6-bisphosphate-dependent) OS=Juglans regia OX=51240 GN=LOC108995508 PE=3 SV=1	30	14	75	3	583	63.8	6	219.16	144.1	139.7	137.3	139.5	142.2	139.6	56.1	56.7	58.9	61.8	62.7	61.4
A0A3G1VTD0	Phenylalanine ammonia-lyase OS=Juglans sigillata OX=224355 GN=PAL PE=2 SV=1	27	17	38	6	717	77.9	6.58	127.51	25.7	25.8	27.2	27.7	28	27.4	139	137.4	133.1	219.7	203.5	205.5
A0A2I4GD34	aconitate hydratase, cytoplasmic OS=Juglans regia OX=51240 GN=LOC109006857 PE=3 SV=2	20	16	48	5	1005	109.4	7.97	147.84	121.1	122.6	124.2	108.1	112.7	113.2	86.8	84.1	87.5	80.6	82.2	77.1
A0A2I4F5E4	heat shock 70 kDa protein, mitochondrial OS=Juglans regia OX=51240 GN=LOC108995713 PE=3 SV=1	26	18	45	3	683	73.2	6.15	131.15	81.4	84.9	92.2	112.9	92.7	104.3	96.4	103.1	102	103.7	118.3	108.1
A0A833WEJ2	Plasma membrane ATPase OS=Juglans regia OX=51240 GN=F2P56_031790 PE=3 SV=1	15	13	34	0	884	96.5	8.03	121.85
A0A2I4H6F2	pre-mRNA-processing-splicing factor 8A-like OS=Juglans regia OX=51240 GN=LOC109013919 PE=4 SV=1	15	30	37	1	2348	274.1	8.76	101.33	86.5	87.6	90.4	88.1	89.2	85.8	103.5	101.5	103	119.7	121.7	122.9
A0A2I4HL04	Calreticulin OS=Juglans regia OX=51240 GN=LOC109019075 PE=3 SV=2	25	9	34	9	420	48.1	4.61	112.91	118.6	117.2	117.7	162.2	166.1	162	49.7	51.5	56.7	66.1	64.9	67.3
A0A833TV66	Phosphoenolpyruvate carboxylase OS=Juglans regia OX=51240 GN=F2P56_036058 PE=3 SV=1	16	17	50	1	975	109.4	6.73	133.11	181.8	194.6	189.5	174.7	160.2	161	21.3	21	25.7	26.4	22	21.8
A0A2I4H0K7	protein EXPORTIN 1A isoform X1 OS=Juglans regia OX=51240 GN=LOC109012479 PE=3 SV=2	19	18	33	18	1078	124.1	5.6	88.81	66.2	64.1	68.7	70.2	67.1	69.5	133.6	133	134.4	129.2	129.5	134.4
A0A2I4H6F3	pre-mRNA-processing-splicing factor 8A OS=Juglans regia OX=51240 GN=LOC109013915 PE=4 SV=1	15	30	37	1	2349	274.2	8.73	97.9	43.4	42.1	51.7	52.5	56.9	59.8	158.8	138.7	136.9	149.3	144.1	165.8
A0A6P9EG02	E1 ubiquitin-activating enzyme OS=Juglans regia OX=51240 GN=LOC108989877 PE=3 SV=1	19	18	39	3	1091	121.6	5.27	124.53	87.9	88.2	88	93.5	90.6	90.5	113	112.6	110.8	108.3	107.7	109
A0A6G6C055	Ribulose bisphosphate carboxylase large chain OS=Carya cathayensis OX=139927 GN=rbcL PE=3 SV=1	27	15	48	9	482	53.4	6.68	135.9	35.9	36.1	37.4	34.4	36.4	36.2	143.7	144.9	138.2	187.3	185.1	184.5
A0A2I4GPH6	Glycine cleavage system P protein OS=Juglans regia OX=51240 GN=LOC109009676 PE=3 SV=1	14	10	34	10	1047	113.7	7.27	116.31	117.3	115.2	111.2	88.2	91.3	87.8	97.6	97.3	100.1	99.4	96.1	98.7
A0A2I4HV50	Vesicle-fusing ATPase OS=Juglans regia OX=51240 GN=LOC109021786 PE=3 SV=1	25	17	37	17	740	81	6.09	117.73	109.9	108.7	109.5	100.2	101.8	100.9	103.6	105.4	107.5	84	84	84.5
A0A2I4EZQ7	UDP-arabinopyranose mutase OS=Juglans regia OX=51240 GN=LOC108994209 PE=3 SV=1	39	13	54	6	362	41	6.43	166.52	101.1	103	105.3	103.4	97.5	96	86.9	90.3	95.5	104.4	106.5	110.1
A0A2I4EBW0	UTP--glucose-1-phosphate uridylyltransferase OS=Juglans regia OX=51240 GN=LOC108988189 PE=3 SV=1	28	11	115	3	472	51.6	6.11	281.34	148.1	145.7	143.3	136.7	136.8	137.1	57.5	56.8	61.4	57.7	58.1	60.9
A0A833Y2U9	Phosphoglycerate kinase (Fragment) OS=Juglans regia OX=51240 GN=F2P56_003958 PE=3 SV=1	33	13	30	9	423	44.4	6.83	100.98	108.2	113.3	112.1	108.3	114.3	113.2	86.8	88	85.7	94.2	87.3	88.6
A0A6P9E1D8	Ubiquitinyl hydrolase 1 OS=Juglans regia OX=51240 GN=LOC109014163 PE=3 SV=1	22	22	35	3	1119	130.9	5.83	98.92	91.5	90.4	89	83.5	82.1	83.6	114.2	116.1	115.5	107.9	113.4	113
A0A2I4FT30	GTP-binding nuclear protein OS=Juglans regia OX=51240 GN=LOC109001813 PE=3 SV=1	49	10	46	10	221	25.1	6.86	140.77	72.6	70.8	72.2	75.8	75.3	76.2	131.2	131.1	126.1	122.5	122.2	123.8
A0A2I4FH22	ADP/ATP translocase OS=Juglans regia OX=51240 GN=LOC108998717 PE=3 SV=1	27	10	84	2	386	42	9.8	213.44	140.6	138.6	133.6	128	138.1	137.6	65.1	65.1	71	61.5	61.7	59.1
A0A2I4FFN2	Isocitrate dehydrogenase [NADP] OS=Juglans regia OX=51240 GN=LOC108998362 PE=3 SV=1	31	12	60	3	416	46.8	8.12	162.85	105.7	112.7	111.9	104.7	99.9	101.3	88.1	91	91.8	93.9	99.4	99.6
A0A2I4EHG8	Malic enzyme OS=Juglans regia OX=51240 GN=LOC108989611 PE=3 SV=1	27	11	22	2	630	70.2	5.87	76.08	93.5	91.1	98	109.5	92.5	103.7	101.5	98.2	108.3	86.7	108.9	108.1
A0A6P9F134	Ribonuclease OS=Juglans regia OX=51240 GN=LOC109009719 PE=4 SV=1	15	15	43	6	991	108.8	7.09	121.1	147.2	141.6	143.7	133.3	135.7	135.4	56.5	57.9	60.3	62.9	62.5	62.9
A0A2I4GA29	chaperonin CPN60-2, mitochondrial-like OS=Juglans regia OX=51240 GN=LOC109006063 PE=3 SV=1	24	12	45	4	580	61.4	5.74	112.98	106.6	107	96.7	114.4	112	110.1	86.2	88.7	88.7	98.4	97.5	93.7
A0A2I4H8N7	puromycin-sensitive aminopeptidase isoform X2 OS=Juglans regia OX=51240 GN=LOC109014484 PE=3 SV=1	17	18	48	18	963	108.5	6.52	125.07	77.4	77.6	77.4	78	79.4	76.6	112.8	112.7	112.7	134.1	131	130.3
A0A2I4DNF0	protein argonaute 1-like OS=Juglans regia OX=51240 GN=LOC108981885 PE=3 SV=1	21	18	26	2	1061	117.7	9.35	92	52.6	50.3	52.8	51.1	47.2	49.2	154.5	152	145.5	151.3	145.6	147.9
A0A2I4HKV1	Transketolase OS=Juglans regia OX=51240 GN=LOC109019027 PE=3 SV=1	16	8	42	8	750	81.2	7.37	133.1	75.5	73	71.9	77.6	77.8	76.4	107.5	107.2	105.9	138.2	145.3	143.6
A0A2I4GVR7	Importin subunit alpha OS=Juglans regia OX=51240 GN=LOC109011307 PE=3 SV=1	26	14	25	3	530	58.7	5.44	95.6	68.2	67.4	70.6	73	72.8	76.1	142	139.8	139.6	115	116.5	118.9
A0A833YD89	C2 domain-containing protein OS=Juglans regia OX=51240 GN=F2P56_001515 PE=4 SV=1	11	16	25	3	2104	224.4	5.44	80.62	41.2	43.1	43.6	46.4	45.7	46.9	169.8	163.2	160.8	145.1	146.5	147.7
A0A2I4E5I4	40S ribosomal protein S14-3-like OS=Juglans regia OX=51240 GN=LOC108986487 PE=3 SV=1	32	7	30	7	150	16.3	10.45	124.32	106	110	105.4	105.9	109.9	108.5	85.8	88.6	85.9	97.4	96.6	100
A0A2I4EG02	Guanosine nucleotide diphosphate dissociation inhibitor OS=Juglans regia OX=51240 GN=LOC108989238 PE=3 SV=1	23	8	40	3	444	49.7	5.58	126.65	180.7	182	165.1	152.5	157.4	157.8	35.3	31.5	36.5	30.8	35.8	34.7
A0A2I4GJ77	Pyruvate dehydrogenase E1 component subunit beta OS=Juglans regia OX=51240 GN=LOC109008338 PE=4 SV=1	26	8	52	3	375	40.2	6.07	156.53	116	115.9	115.4	119.9	119.3	118.1	81.8	80.9	83.7	82.8	81.8	84.4
A0A833WUA3	ADP/ATP translocase (Fragment) OS=Juglans regia OX=51240 GN=F2P56_031545 PE=3 SV=1	24	11	92	3	440	48.1	9.8	228.56	125.4	122.7	121.1	124.6	128.6	126.8	76.2	77.6	77.9	73.3	73.5	72.1
A0A2I4EB92	14-3-3-like protein A OS=Juglans regia OX=51240 GN=LOC108988028 PE=3 SV=1	32	11	76	1	264	29.7	4.81	195.39	80.4	79.9	83.2	80.4	74.7	79	112.4	120.8	125.5	112.7	126.9	124.1
A0A2I4DSK4	D-3-phosphoglycerate dehydrogenase OS=Juglans regia OX=51240 GN=LOC108983060 PE=3 SV=1	18	10	60	7	632	66.9	7.11	180.88	108.4	111.1	106.7	98.4	100	99.2	91	90.3	89.4	106.6	98.2	100.6
A0A2I4HPW3	Citrate synthase OS=Juglans regia OX=51240 GN=LOC109020222 PE=3 SV=1	23	7	24	7	471	52.6	7.83	79.6	122.9	122.8	121.9	123	121.8	124.9	72	72.1	75.4	80.7	81.3	81.3
A0A6P9ERB8	1,3-beta-glucan synthase OS=Juglans regia OX=51240 GN=LOC108996360 PE=3 SV=1	11	18	29	15	1915	220.1	8.85	89.35	190.7	185.8	189.4	138.1	132.6	136.1	35.2	34.7	39.5	38.8	40	39.1
A0A2I4DWC6	UTP--glucose-1-phosphate uridylyltransferase OS=Juglans regia OX=51240 GN=LOC108984075 PE=3 SV=1	28	10	108	2	475	52.1	6.07	268.22	150.7	153.7	145.2	139.7	137.9	140.9	54.3	53.4	56	54.8	56.3	57
A0A6P9FAE1	Phospho-2-dehydro-3-deoxyheptonate aldolase OS=Juglans regia OX=51240 GN=LOC109020584 PE=3 SV=1	26	11	29	4	540	60	8.34	91.44	62.4	56.7	56.1	63.1	62.6	64.1	132.4	135.1	132.9	143.8	145.4	145.4
A0A2I4E588	Inorganic diphosphatase OS=Juglans regia OX=51240 GN=LOC108986404 PE=3 SV=1	29	7	52	4	216	24.8	5.99	145.65	173.9	171.9	172	180.5	175.5	181.6	18.8	21.5	28.6	24.6	25.2	26
A0A833WNN7	Aconitate hydratase OS=Juglans regia OX=51240 GN=F2P56_022380 PE=3 SV=1	16	12	39	2	898	97.8	6.62	121.54	168.5	161.4	167.5	158.8	153.1	150.3	37.5	35.6	38.5	39.8	44.3	44.7
A0A833UHT4	C2 domain-containing protein OS=Juglans regia OX=51240 GN=F2P56_022163 PE=4 SV=1	10	15	24	2	2151	229.5	5.62	77.68	69.4	83.6	75	77.7	76.7	72.8	143.9	114.9	130.5	120.3	109.8	125.4
A0A2I4G5X7	chaperonin CPN60-2, mitochondrial OS=Juglans regia OX=51240 GN=LOC109005012 PE=3 SV=1	26	13	46	1	575	61.6	5.49	108.9	98.1	98.8	93.8	105.4	108.7	106.8	96.1	97.9	99.7	100.3	95.6	98.7
A0A2I4EC90	UDP-arabinopyranose mutase OS=Juglans regia OX=51240 GN=LOC108988255 PE=3 SV=1	33	13	69	1	362	41	6.07	194.45	145.9	144.1	133.5	135.7	130.4	132.7	51.8	48.8	57.8	73.2	74.3	71.8
A0A2I4FAV2	Phenylalanine ammonia-lyase OS=Juglans regia OX=51240 GN=LOC108997102 PE=3 SV=1	18	11	27	1	708	77	6.38	91.47	8.6	10.4	9	8.7	11.1	12.9	147.9	153	152	243	229.8	213.5
A0A2I4EVT5	leucine aminopeptidase 1-like OS=Juglans regia OX=51240 GN=LOC108993170 PE=3 SV=1	16	8	44	1	577	60	7.01	125.22	73.2	74.2	69.7	68.6	72.2	69.2	132	135.5	126.4	138.8	120.4	119.7
A0A2I4EEI7	cullin-associated NEDD8-dissociated protein 1 OS=Juglans regia OX=51240 GN=LOC108988886 PE=3 SV=1	18	23	34	23	1219	134.4	5.77	91.54	105.5	103.9	106.6	101.5	99.8	101.2	97.9	99	97.1	93.7	96.2	97.6
A0A2I4GZK2	ras-related protein Rab7 OS=Juglans regia OX=51240 GN=LOC109012251 PE=4 SV=1	74	13	26	4	207	23.2	5.33	90.16	99	97	96	94.2	95.7	95.4	115.1	115.6	115.8	89.7	94	92.7
A0A2I4E8K7	glyoxysomal fatty acid beta-oxidation multifunctional protein MFP-a-like OS=Juglans regia OX=51240 GN=LOC108987298 PE=3 SV=1	20	13	26	11	726	79.3	9.03	72.11	145.5	144.7	149.3	137	132.4	134.9	48.9	50.1	51.4	68.3	68.7	68.6
A0A2I4FMJ8	Ribonuclease OS=Juglans regia OX=51240 GN=LOC109000464 PE=4 SV=1	19	16	36	7	991	108.8	6.93	109.52	144.7	147.5	142.5	133.6	136.9	137.3	56.2	54.5	58.9	63.8	61.5	62.5
A0A2I4GN92	Pyruvate kinase OS=Juglans regia OX=51240 GN=LOC109009364 PE=3 SV=1	20	8	35	2	527	57.5	6.67	124.3	108.8	110.7	114.4	99.1	91.3	96.3	101.2	88.2	91.5	100.8	96.8	101
A0A833Y5A9	Tubulin_C domain-containing protein OS=Juglans regia OX=51240 GN=F2P56_007929 PE=3 SV=1	54	10	59	1	215	24.8	4.86	170.48
A0A2I4ENX9	Phosphoenolpyruvate carboxykinase (ATP) OS=Juglans regia OX=51240 GN=LOC108991349 PE=3 SV=1	19	11	27	3	665	73.6	6.98	82.77	111.1	104.5	112.4	75.5	71.9	74.6	104	96.3	97.6	116.6	114.5	121.1
A0A2I4G5R8	40S ribosomal protein SA OS=Juglans regia OX=51240 GN=LOC109004976 PE=3 SV=1	35	9	27	1	304	33.6	5.36	85.57	118.5	119.4	128.1	118.9	101.2	95.2	82.2	75.7	83.7	93.2	87.2	96.6
A0A2I4G9T5	6-phosphogluconate dehydrogenase, decarboxylating OS=Juglans regia OX=51240 GN=LOC109005994 PE=3 SV=2	26	10	40	2	495	54	5.92	112.03	94	95.9	103.8	111.5	106.9	110.1	94	97.3	101.8	89.1	96.8	98.8
A0A2I4E2Z2	Phosphoenolpyruvate carboxykinase (ATP) OS=Juglans regia OX=51240 GN=LOC108985800 PE=3 SV=1	19	11	26	3	656	73	6.21	81.66	92.6	94.4	94	74.4	72.1	73.5	89.8	93.5	93.2	137.8	142.7	142
A0A2I4F485	Succinate dehydrogenase [ubiquinone] flavoprotein subunit, mitochondrial OS=Juglans regia OX=51240 GN=LOC108995347 PE=3 SV=1	25	11	29	5	636	70	6.57	96.99	123.6	121.7	124.1	122.1	123	123	74.3	73.9	78.7	76.9	79.6	79.1
A0A2I4EVM0	protein argonaute 1-like OS=Juglans regia OX=51240 GN=LOC108993129 PE=3 SV=1	18	15	22	1	1073	118.8	9.41	81.96	46	36.9	43	41.6	41	41.9	167.8	160.9	168	146.7	159.8	146.4
A0A833Y7E0	Glutamine synthetase OS=Juglans regia OX=51240 GN=F2P56_000804 PE=3 SV=1	34	11	41	1	391	43.4	8.5	130.61	36.5	38.9	41.2	49.9	50	50.2	141.3	132.4	138.6	176.2	174.2	170.4
A0A2I4GTR6	heat shock protein 83 OS=Juglans regia OX=51240 GN=LOC109010830 PE=3 SV=1	27	19	42	8	703	80.9	5.07	125.53	86.9	85.8	80.9	81.6	78.1	81.9	121.1	125.1	121.6	114	111.7	111.4
A0A2I4H6D4	Phospholipase D OS=Juglans regia OX=51240 GN=LOC109013902 PE=3 SV=1	16	10	29	3	808	92	6.02	110.85	98.1	97	103.8	90.9	89	91.2	96.2	98.3	100.9	108.4	112.8	113.4
A0A2I4HEW0	T-complex protein 1 subunit delta OS=Juglans regia OX=51240 GN=LOC109016773 PE=3 SV=1	26	11	32	11	534	57.5	7.03	101.28	98	97.9	98.7	97.5	94.4	94.7	103.2	104.5	103	102.5	102.6	103
A0A833XHQ4	Uncharacterized protein (Fragment) OS=Juglans regia OX=51240 GN=F2P56_016150 PE=3 SV=1	25	13	53	4	618	66.5	6.35	120.93	101.9	101.9	101.5	112.6	113.1	113.3	91	89.8	91.7	95.3	94.1	93.7
A0A2I4GBP1	Proteasome subunit alpha type OS=Juglans regia OX=51240 GN=LOC109020971 PE=3 SV=1	40	9	33	9	237	26.1	4.75	114.82	73.8	72	73.1	81.1	81.7	80.3	119.6	120.1	117.7	129.3	125.8	125.4
A0A2I4FY55	Aminopeptidase OS=Juglans regia OX=51240 GN=LOC109003066 PE=3 SV=1	12	11	35	5	873	98.5	5.71	99.23	84.8	89.2	89.1	75.7	75.7	75.4	111.6	109.9	105.6	130	124.2	128.7
A0A2I4FN27	ADP/ATP translocase OS=Juglans regia OX=51240 GN=LOC109000576 PE=3 SV=1	23	10	81	3	381	41.2	9.74	201.03	130.3	129	125	127.2	137.1	129.5	69.7	71.4	72.3	66.5	71.4	70.6
A0A2I4FC83	6-phosphogluconate dehydrogenase, decarboxylating OS=Juglans regia OX=51240 GN=LOC108997435 PE=3 SV=1	28	11	40	3	496	54.4	6.27	111.09	98	98.2	102.1	95.3	101.1	100.5	107.4	100.3	102.9	103.9	96.2	94
A0A2I4HTB4	Phenylalanine ammonia-lyase OS=Juglans regia OX=51240 GN=LOC109021248 PE=3 SV=1	19	13	31	5	712	77.7	6.51	95.64	33.3	35.3	32.9	49.5	51.8	53.6	121.5	124.6	124.9	187.3	189.8	195.5
A0A834CQN7	Uncharacterized protein (Fragment) OS=Juglans regia OX=51240 GN=F2P56_016254 PE=3 SV=1	34	9	27	1	318	35.1	5.39	84.68	97.4	95.8	96.4	94.6	89.8	93.9	99.7	101.1	101.1	108.3	110.5	111.4
A0A2I4GTW9	Pyruvate kinase OS=Juglans regia OX=51240 GN=LOC109010859 PE=3 SV=2	22	10	24	8	576	63.4	6.84	79.39	94.8	95.5	94.1	90	90	93.1	119.6	120.4	120.3	91.4	96.1	94.5
A0A2I4ELS4	myosin-11 OS=Juglans regia OX=51240 GN=LOC108990737 PE=3 SV=1	16	22	34	4	1530	173.4	8.97	97.77	148.9	146.9	148.8	126.5	127.1	127.5	63.2	65.5	69.6	57.8	59.9	58.3
A0A6P9EVF6	H(+)-exporting diphosphatase OS=Juglans regia OX=51240 GN=LOC109019074 PE=3 SV=1	14	11	38	1	762	80.1	5.02	121.07	42.1	41.3	42.3	51.6	54	46.3	181.9	224.7	164.3	96.8	126	128.8
A0A2I4GPY2	Elongation factor Tu OS=Juglans regia OX=51240 GN=LOC109010931 PE=3 SV=1	30	12	34	3	448	49	7.01	94.32	126.6	127.2	122.9	135.5	137.6	135.2	67.7	65.7	70.8	71.3	68.5	71.1
A0A2I4F2F7	E1 ubiquitin-activating enzyme OS=Juglans regia OX=51240 GN=LOC108994888 PE=3 SV=2	14	11	29	3	1018	113.8	5.59	97.91	64.5	67	69.5	62.3	61.3	62.4	134.7	130.3	131.2	136.7	139.2	140.8
A0A2I4EY41	importin subunit beta-1-like OS=Juglans regia OX=51240 GN=LOC108993755 PE=4 SV=1	19	12	26	1	872	96.5	4.73	83.49	45.6	45.7	45.8	43.7	48.2	45.1	174.3	173.9	169.1	138.5	135.6	134.4
A0A2I4F0I3	GTP-binding protein YPTM2 OS=Juglans regia OX=51240 GN=LOC108994408 PE=4 SV=1	56	10	41	2	202	22.6	5.71	107.28	124.9	126.6	121	114.7	111	113.4	81.7	86.3	84.3	81.3	78	76.8
A0A2I4EB93	ADP/ATP translocase OS=Juglans regia OX=51240 GN=LOC108988027 PE=3 SV=1	26	10	83	2	395	42.9	9.72	206.63	119.4	114.4	110.3	135.3	142.6	142.4	71.4	72.6	77.9	71.4	74.4	67.9
A0A2I4DSC4	probable pyridoxal 5'-phosphate synthase subunit PDX1 OS=Juglans regia OX=51240 GN=LOC108982999 PE=3 SV=1	25	9	47	8	311	33.3	6.18	124.79	158.5	159	157	162.6	162.3	163.4	34.3	32.8	38.9	44.6	42.8	43.8
A0A2I4DLF7	Serine/threonine-protein phosphatase OS=Juglans regia OX=51240 GN=LOC108981323 PE=3 SV=1	48	12	23	7	311	35.6	5.41	79.83	94.5	96.2	98.7	91.5	92.1	91	102.8	102.2	105.2	106.7	110.2	109
A0A2I4FXM2	Serine/threonine-protein phosphatase OS=Juglans regia OX=51240 GN=LOC109002920 PE=3 SV=1	46	11	23	11	303	34.8	5.01	80.16	90.4	91.4	95.4	103.8	99.3	102.9	101.1	98.2	97	103	107.7	109.9
A0A2I4G1V0	dynamin-related protein 1C OS=Juglans regia OX=51240 GN=LOC109003988 PE=3 SV=1	25	12	23	2	610	68.5	7.84	78.33	105.7	107	108.1	115.6	106.5	110.4	101.1	95.1	95.5	81.2	86.1	87.7
A0A2I4EXU6	Proteasome subunit alpha type OS=Juglans regia OX=51240 GN=LOC108993688 PE=3 SV=1	40	7	25	4	250	27.3	6.24	96.75	67.2	66	66.8	66.5	66.4	65.5	128.1	128.2	127.4	138.5	140	139.4
A0A2I4FU79	importin subunit beta-1-like OS=Juglans regia OX=51240 GN=LOC109002072 PE=4 SV=1	20	12	26	1	872	96.5	4.72	83.49	49.6	53.2	53.4	54.6	54.5	55.7	152.4	148.6	143.2	139.1	143.5	152.2
A0A2I4EBN5	Glutamate decarboxylase OS=Juglans regia OX=51240 GN=LOC108988130 PE=3 SV=1	20	8	26	7	499	56.6	5.85	78.86	98.3	95.7	93.5	90.5	96.9	95	112.9	113.3	114.9	95.6	96.2	97.2
A0A2I4G6G4	Fructose-bisphosphate aldolase OS=Juglans regia OX=51240 GN=LOC109005150 PE=3 SV=1	19	6	205	1	358	38.6	7.77	620.42	99	101.4	105	103.1	97.3	98.6	90.2	88.3	89.9	107.8	109.2	110.2
A0A2I4GIC3	cytochrome P450 98A2 OS=Juglans regia OX=51240 GN=LOC109008126 PE=3 SV=1	21	12	40	3	564	64	8.59	108.35	22.9	24.1	22.8	23.2	24	24.3	164.4	166.5	159.7	187.1	189.2	191.8
A0A6P9EQF8	Ubiquitinyl hydrolase 1 OS=Juglans regia OX=51240 GN=LOC109019926 PE=3 SV=1	19	21	34	1	1122	131.6	5.83	88.29	109	115.7	115.9	103.8	99.9	97.4	74.4	78.2	83.6	107.9	105.4	108.7
E5DKC0	ATP synthase subunit alpha (Fragment) OS=Juglans cinerea OX=91214 GN=atp1 PE=3 SV=1	32	10	81	9	349	37.3	7.37	208.2	110.6	108.5	108	107.3	103.4	105	93.6	91	94.4	94.1	91.6	92.4
A0A2I4DXX6	heat shock 70 kDa protein 15-like OS=Juglans regia OX=51240 GN=LOC108984482 PE=4 SV=1	12	8	42	4	860	95.1	5.2	125.3	111.9	114.5	108.8	96.3	97.3	94.5	100.9	98.8	99.6	93.5	90.9	93
A0A2I4FJD1	60S ribosomal protein L4-like OS=Juglans regia OX=51240 GN=LOC108999330 PE=3 SV=1	23	9	40	3	403	44.6	10.4	116.57	147.2	143.5	144.8	156.4	159.7	158.8	40.8	43.2	47.7	53.1	52.8	52.1
A0A2I4H4Q0	Ubiquitinyl hydrolase 1 OS=Juglans regia OX=51240 GN=LOC109013487 PE=3 SV=2	18	18	31	3	1116	130.6	5.87	89.7	88.2	82.2	79.9	79.6	72.5	70.8	116.3	113.9	116.1	114.2	134.2	132.1
A0A6P9EAC2	Ubiquitinyl hydrolase 1 OS=Juglans regia OX=51240 GN=LOC109011960 PE=3 SV=1	19	20	33	3	1116	130.8	5.9	98.7	88.3	96.2	97.3	87.1	85.7	83.4	110	104.1	107.5	117.1	114.2	109.2
A0A2I4GKH7	Pyruvate dehydrogenase E1 component subunit alpha OS=Juglans regia OX=51240 GN=LOC109008675 PE=4 SV=1	21	7	35	3	401	43.9	7.96	98.22	104.9	108.2	109.3	99.4	96.5	97.3	97.3	96.6	99.2	94.4	99.3	97.7
A0A2I4E4C1	Citrate synthase OS=Juglans regia OX=51240 GN=LOC108986174 PE=3 SV=1	22	10	32	2	514	56.6	8.38	102.64	151.4	158.5	152.3	166.7	159.2	168.2	39.7	39.8	43.5	41.9	39.4	39.6
A0A2I4G2M0	26S proteasome non-ATPase regulatory subunit 14 homolog OS=Juglans regia OX=51240 GN=LOC109004156 PE=4 SV=1	43	10	31	10	312	34.8	6.8	88.54	84.7	86.2	86.1	91.7	90.1	91.8	111.2	115.1	111	111.3	110.3	110.5
A0A2I4FEZ3	GDP-mannose 3,5-epimerase 2 OS=Juglans regia OX=51240 GN=LOC108998187 PE=4 SV=1	50	15	36	3	378	42.6	6.34	102.9	87.3	85.8	84.6	88.1	90.2	87.7	102.9	103.6	104.5	122.3	122.3	120.7
A0A2I4GPM5	Pyruvate kinase OS=Juglans regia OX=51240 GN=LOC109009682 PE=3 SV=1	24	11	37	4	497	54	7.17	96.11	148.5	142.1	143.6	134.3	133.2	132.9	61.3	61.1	63.8	59.5	59.6	60.2
A0A6P9DU70	myosin-11-like OS=Juglans regia OX=51240 GN=LOC109000365 PE=3 SV=1	14	20	32	1	1560	177.5	8.92	91.95	139.6	134.8	132.5	140.5	136.3	140.6	55	60.3	63.5	61	69	66.8
A0A2I4E7R9	14-3-3-like protein A OS=Juglans regia OX=51240 GN=LOC108987060 PE=3 SV=1	31	11	72	1	267	30	4.81	177.63	70.3	69.1	69.4	64	64.1	67.1	122.1	125.3	121.3	138.8	144.4	144.2
A0A2I4GHY3	Malic enzyme OS=Juglans regia OX=51240 GN=LOC109008031 PE=3 SV=1	22	11	23	2	628	69.9	6.1	72.29	74.5	74.6	75.5	68.5	69.5	73.5	142.9	144.4	140.4	110.9	112.9	112.5
A0A2I4G6B1	Pyruvate kinase OS=Juglans regia OX=51240 GN=LOC109005102 PE=3 SV=1	27	12	32	3	592	64.9	5.49	89.23	76.3	78.6	77.7	80.6	79.6	79.9	127.3	124.7	123.5	117.8	118.4	115.6
A0A2I4DUK4	Glutamate dehydrogenase OS=Juglans regia OX=51240 GN=LOC108983585 PE=3 SV=1	27	8	21	3	411	44.6	6.55	70.57	80.7	80.2	83.4	83.3	79	79.3	114.7	112.5	113.9	123.8	123.7	125.5
A0A2I4E570	Oxoglutarate dehydrogenase (succinyl-transferring) OS=Juglans regia OX=51240 GN=LOC108986378 PE=3 SV=1	16	15	33	3	1021	115.8	6.76	109.19	96.8	98.5	104.1	100.5	93.8	95	113.7	112.9	110.2	95.2	90.4	89
A0A6P9ESN3	Glutamine synthetase OS=Juglans regia OX=51240 GN=LOC109021470 PE=3 SV=1	31	12	39	4	356	39.2	6.2	106.16	90.1	99.3	93.6	91.5	94.9	99.3	95.5	97.4	96.4	118.4	111.8	111.7
A0A2I4G7L3	alcohol dehydrogenase-like OS=Juglans regia OX=51240 GN=LOC109005404 PE=3 SV=1	29	8	53	1	380	41.2	6.65	156.15	105.6	104.2	101.3	95.4	90.8	95.2	100	106.3	104.6	95.8	99	101.8
A0A2I4FYU6	26S proteasome non-ATPase regulatory subunit 11 homolog OS=Juglans regia OX=51240 GN=LOC109003228 PE=3 SV=1	41	14	34	5	422	47	6.39	78.26	87.1	82.1	84.4	86.1	86.8	88.9	114.9	116.5	116	108.4	112.7	116.2
A0A2I4G5G5	Malic enzyme OS=Juglans regia OX=51240 GN=LOC109004891 PE=3 SV=1	22	11	28	2	645	70.9	7.06	88.5	92	90.3	87.3	91.6	80.7	84.2	120.4	137	125.1	92	97.8	101.6
A0A6P9ECC3	Serine/threonine-protein phosphatase OS=Juglans regia OX=51240 GN=LOC108985002 PE=3 SV=1	42	11	24	6	306	35	4.96	88.87	83.1	83.7	83.2	83.9	87.1	81.9	112.7	114	112.2	118.7	119.7	119.6
A0A2I4ETQ7	Pyruvate dehydrogenase E1 component subunit alpha OS=Juglans regia OX=51240 GN=LOC108992640 PE=4 SV=1	28	13	38	13	432	47.9	7.27	89.18	118.7	118.5	120.6	118.8	120.1	122.1	75.2	75.6	77.2	83	86.6	83.7
A0A2I4E4C3	Dihydrolipoyl dehydrogenase OS=Juglans regia OX=51240 GN=LOC108986181 PE=3 SV=1	19	8	29	4	510	54	7.03	95.62	105.2	105.4	103.6	109.8	110.4	108.6	91.9	91.6	90.3	91.7	95.8	95.9
A0A2I4GVC1	ras-related protein Rab7 OS=Juglans regia OX=51240 GN=LOC109011197 PE=4 SV=2	69	12	27	4	206	23.1	5.31	89.31	69	75	78.7	61	71.1	69.6	140.4	136.6	142.4	122	114.5	119.6
A0A6P9F6P4	Sucrose synthase OS=Juglans regia OX=51240 GN=LOC108990945 PE=3 SV=1	14	12	49	4	806	92.3	6.48	142.34	43.8	46.1	43.9	42.5	44	44.9	164	173.4	165.9	142.8	144.3	144.4
A0A2I4EB99	UDP-glucose 6-dehydrogenase OS=Juglans regia OX=51240 GN=LOC108988034 PE=3 SV=1	21	9	44	1	480	52.9	6.46	147.36	76.2	76.4	81	71.1	74.6	69.5	130.7	122.7	130.4	117.5	128.4	121.3
A0A833UUK1	Glucose-1-phosphate adenylyltransferase OS=Juglans regia OX=51240 GN=F2P56_023476 PE=3 SV=1	30	12	28	12	526	57.4	7.08	84.59	114.1	113.7	110.8	111.4	112.8	109.6	88.5	90.3	92.1	86.1	87.4	83.3
A0A2I4G046	T-complex protein 1 subunit gamma OS=Juglans regia OX=51240 GN=LOC109003549 PE=3 SV=1	25	17	34	17	557	60.6	6.27	80.3	97.2	98	97.7	99.6	98.1	96.8	101.8	102.2	101.4	105.4	100.6	101.2
A0A2I4FSE5	RNA helicase OS=Juglans regia OX=51240 GN=LOC109001659 PE=4 SV=1	23	12	30	4	619	66.6	7.9	86.83	117.7	117.8	119.5	117.7	117	114.2	81.2	82.6	85.5	83.8	81.9	81.1
A0A2I4GCK7	Glycine--tRNA ligase OS=Juglans regia OX=51240 GN=LOC109006720 PE=3 SV=1	20	14	27	14	691	77.2	6.18	78.21	105.8	105.1	104.9	114.8	113.4	114.6	84.2	84.1	86.9	94.7	94.6	97
A0A2I4E7U5	T-complex protein 1 subunit zeta 1 isoform X1 OS=Juglans regia OX=51240 GN=LOC108987069 PE=3 SV=1	25	12	36	2	535	58.9	6.01	100.8	131.8	123.6	129.7	125.7	136.2	130.7	69.3	70.7	75.2	68.6	70.1	68.5
A0A2I4EDD8	Calcium-transporting ATPase OS=Juglans regia OX=51240 GN=LOC108988565 PE=3 SV=2	11	10	27	4	1017	110.9	5.72	78.47	172	164.5	165.3	146.7	138.3	141.3	41.5	41.7	46.3	47.4	48.2	46.7
A0A6P9ECR0	Serine/threonine-protein phosphatase OS=Juglans regia OX=51240 GN=LOC108997817 PE=3 SV=1	20	16	20	13	1037	110.9	6.16	65.96	88	90.2	89.2	90.5	86.7	88.2	118	112.9	114.6	103.6	109.6	108.4
A0A2I4DHS7	Pyruvate dehydrogenase E1 component subunit beta OS=Juglans regia OX=51240 GN=LOC108980291 PE=4 SV=1	18	7	38	2	376	40.1	5.78	122.3	135.1	123.4	131.6	127.6	114.3	121.8	79.5	80.1	79.8	71.5	66.6	68.7
A0A2I4G7W0	fructokinase-2 OS=Juglans regia OX=51240 GN=LOC109005478 PE=3 SV=1	26	7	35	2	333	35.5	5.34	115.7	132.4	132	127.5	122	122.3	118.7	77.4	76	77.1	73.7	69.2	71.8
A0A2I4FA14	E1 ubiquitin-activating enzyme OS=Juglans regia OX=51240 GN=LOC108996893 PE=3 SV=1	13	13	27	1	1101	122.6	5.35	90	105.8	93.2	95.1	104.6	101.3	86	103.2	109.1	90.5	106.1	110.3	94.8
A0A2I4FPI8	brefeldin A-inhibited guanine nucleotide-exchange protein 5 isoform X2 OS=Juglans regia OX=51240 GN=LOC109000952 PE=4 SV=2	10	14	25	14	1774	196.7	5.77	74.58	117.3	117.3	118.3	116.3	115.9	118.4	86.7	86.4	90.1	74.9	79.5	78.8
A0A2I4F5Q9	GDP-mannose 3,5-epimerase 2-like OS=Juglans regia OX=51240 GN=LOC108995811 PE=4 SV=1	45	13	33	1	376	42.5	6.34	93.77	118.5	110.3	119.4	119.6	131.9	122.4	77.1	82.8	82.2	75	85.5	75.4
A0A6P9EKS0	probable methyltransferase PMT27 OS=Juglans regia OX=51240 GN=LOC109008651 PE=3 SV=1	12	10	25	5	929	105.3	5.33	76.18	168.1	164.4	163.1	163.7	160.3	163.1	33.7	33.6	38.9	37.6	36.7	36.8
A0A2I4FXP4	Catalase OS=Juglans regia OX=51240 GN=LOC109002939 PE=3 SV=1	28	13	33	11	492	56.9	7.39	100.16	109.2	108	108.4	107.8	107	109.4	83.7	84.9	84.3	100.5	99.4	97.4
A0A2I4E207	heat shock 70 kDa protein, mitochondrial-like OS=Juglans regia OX=51240 GN=LOC108985551 PE=3 SV=1	15	10	34	1	681	73.2	5.97	95.75	109.6	114.8	109	129.2	131.8	131.7	74.1	75.7	79	78.3	85.7	81
A0A2I4F961	Citrate synthase OS=Juglans regia OX=51240 GN=LOC108996640 PE=3 SV=2	21	10	27	2	514	56.5	7.65	93	129.4	130.1	134.3	137.9	139.1	142.8	61.7	60.5	65.7	64.4	65.9	68.4
A0A833YC45	Sucrose synthase OS=Juglans regia OX=51240 GN=F2P56_002260 PE=3 SV=1	28	9	43	1	337	38.9	7.37	128.13	99.6	106.9	110.1	112	94.4	91.6	90.7	98.5	90.4	96.8	104.4	104.3
A0A2I4ELG3	very-long-chain 3-oxoacyl-CoA reductase 1 OS=Juglans regia OX=51240 GN=LOC108990665 PE=3 SV=1	28	8	16	8	320	35.8	9.69	59.09	45.7	47.8	47.3	47.3	48.1	49.5	163.3	159.7	156.6	142.3	146.1	146.1
A0A2I4EJD9	4-hydroxy-3-methylbut-2-en-1-yl diphosphate synthase (Ferredoxin), chloroplastic OS=Juglans regia OX=51240 GN=LOC108990107 PE=3 SV=1	19	13	21	13	740	82.2	6.35	62.61	59.7	58	56.9	67	65.7	64.3	125.7	126.3	123.5	146.3	151.9	154.7
A0A2I4FQC5	14-3-3-like protein B OS=Juglans regia OX=51240 GN=LOC109001155 PE=3 SV=1	31	9	46	2	252	28.4	4.79	120.42	58.4	54.8	58	63.7	60.9	63.4	150.6	150.5	149.4	124.6	132.3	133.4
A0A2I4EM25	T-complex protein 1 subunit epsilon OS=Juglans regia OX=51240 GN=LOC108990809 PE=3 SV=1	29	12	25	12	535	59.1	5.67	77.65	103	100.2	101.5	97.4	96	98.9	95.4	99.2	104.6	99.1	101	103.6
A0A6P9EQ83	ATP-dependent zinc metalloprotease FTSH 10, mitochondrial-like OS=Juglans regia OX=51240 GN=LOC109002612 PE=3 SV=1	22	14	24	7	821	90.6	8.35	64.84	124.3	130.5	130	151	141.3	140.4	59.6	60.3	63.5	68.5	63.4	67.1
A0A411PPB2	ATP synthase subunit beta, chloroplastic OS=Carya illinoinensis OX=32201 GN=atpB PE=3 SV=1	35	13	31	12	491	52.7	5.36	98.91	50.1	47.6	48.7	55.9	54.7	55.5	146.5	143.4	143.3	146	155.3	153
A0A2I4EYN6	40S ribosomal protein S4 OS=Juglans regia OX=51240 GN=LOC108993916 PE=3 SV=1	47	13	39	2	264	29.8	10.24	102.18	135.3	134.9	136.8	137.2	135.3	134.7	47	45	48.9	85.2	80	79.9
A0A2I4DGQ1	60S ribosomal protein L3-2 OS=Juglans regia OX=51240 GN=LOC108979982 PE=3 SV=2	23	12	41	2	389	44.6	10.1	122.64	149.7	145.6	153.3	134.6	132	131.8	53.2	53.4	53.9	61.9	64.8	65.9
A0A2I4EG05	calcium-transporting ATPase 1, endoplasmic reticulum-type-like OS=Juglans regia OX=51240 GN=LOC108989234 PE=4 SV=1	14	13	30	13	1059	116.3	5.39	80.55	130.6	130.6	129.7	115.7	116.2	116.5	78.8	77.2	78.9	75.8	74.8	75.1
A0A2I4FVL2	26S proteasome regulatory subunit 6B homolog OS=Juglans regia OX=51240 GN=LOC109002408 PE=3 SV=1	39	15	33	14	419	47.1	5.71	98.66	96.7	95.8	95.4	106.4	108.5	108.1	101.3	104.1	102.5	92.2	95	93.9
A0A2I4GCB8	probable 26S proteasome non-ATPase regulatory subunit 3 OS=Juglans regia OX=51240 GN=LOC109006613 PE=3 SV=1	31	15	30	2	487	55.6	8.65	90.53	88.8	88.9	90.1	83.2	83.5	79.7	120.9	117.4	112.1	115.5	109.1	110.9
A0A833U6C7	Serine hydroxymethyltransferase OS=Juglans regia OX=51240 GN=F2P56_024012 PE=3 SV=1	24	10	32	4	513	56.9	8.73	91.44	105	107.6	103.8	106.6	107.3	106.6	99.6	100.6	97.8	89.7	86.8	88.7
A0A834D3H3	Proteasome subunit alpha type (Fragment) OS=Juglans regia OX=51240 GN=F2P56_006503 PE=3 SV=1	37	9	23	8	279	30.5	8.57	85.47	69	68.4	68.1	72.3	70.2	73	122.3	125.6	122.4	132.2	138.2	138.3
A0A2I4DQD6	Methyltransferase OS=Juglans regia OX=51240 GN=LOC108982449 PE=3 SV=1	15	11	32	10	629	71.6	8	82.39	181.9	181.6	171.4	177	177.6	177	18.8	18.8	26	23.3	23.3	23.4
A0A2I4FAG9	UDP-glucose 4-epimerase OS=Juglans regia OX=51240 GN=LOC108997019 PE=3 SV=1	24	7	24	2	350	39.2	6.73	75.42	161.4	163.1	162.4	169.3	166.3	171.1	30.1	28.7	35.5	37.3	36.8	38.1
A0A6P9ES51	Cysteine synthase OS=Juglans regia OX=51240 GN=LOC108979480 PE=3 SV=1	30	7	49	4	336	35.5	5.94	124.2	77.5	74.6	72.6	82.8	84.6	80.2	116.1	119.2	114.7	124.5	126.3	126.9
A0A2I4DX89	Aspartate aminotransferase OS=Juglans regia OX=51240 GN=LOC108984311 PE=3 SV=1	25	11	45	7	464	51	8.48	136.73	119.9	120.6	120.4	113.7	114.4	111.6	84.7	85.8	85.3	82.5	79.5	81.8
A0A2I4FWH9	ras-related protein RABE1c OS=Juglans regia OX=51240 GN=LOC109002622 PE=4 SV=1	51	10	28	1	216	23.8	8.24	93.1	104	104.8	96.9	102.5	109.1	107.3	108.4	108.5	107.5	84.3	82.8	84
A0A2I4DII8	vignain-like OS=Juglans regia OX=51240 GN=LOC108980473 PE=3 SV=2	11	4	36	4	360	39.9	6.16	118.41	37.3	37.3	38.1	41	40.6	40.7	141.3	137.8	137.3	182.8	181.9	183.9
A0A2I4EGW7	Pyruvate kinase OS=Juglans regia OX=51240 GN=LOC108989469 PE=3 SV=1	21	10	28	1	595	65.2	5.99	81.39	64.5	70.1	65.8	82.5	68.7	73.4	130.2	130.6	139.6	116.7	124.8	133.1
A0A833XS83	Asparagine synthetase [glutamine-hydrolyzing] OS=Juglans regia OX=51240 GN=F2P56_010937 PE=4 SV=1	20	8	23	4	472	53.1	6.71	75.82	110.6	109.5	114.4	106.1	100.7	104.2	71.6	74	73.4	105.5	115.5	114.4
A0A2I4GIM4	Coatomer subunit beta OS=Juglans regia OX=51240 GN=LOC109008189 PE=4 SV=2	11	10	24	1	948	105.8	5.96	72.17	119.3	116.8	121.6	110.2	116.3	111.5	90.2	93	98	71.5	76.3	75.3
A0A6P9E3B0	GTP-binding protein SAR1A isoform X1 OS=Juglans regia OX=51240 GN=LOC109009932 PE=3 SV=1	61	12	26	12	193	22	7.47	76.08	101.2	100.4	100	108	109.9	109.5	102.1	105.6	104.8	86.1	86.1	86.3
A0A2I4GLC4	Aminopeptidase OS=Juglans regia OX=51240 GN=LOC109008886 PE=3 SV=1	9	8	33	2	899	102.5	5.53	88.5	83.5	88.4	86.1	74.2	75.1	74.6	111	114.8	112.8	126.8	125.6	127.1
A0A2I4DXU0	UDP-glucose 4-epimerase OS=Juglans regia OX=51240 GN=LOC108984435 PE=3 SV=1	24	7	25	2	368	41.5	7.18	80.05	157	155.4	149	160.7	159.3	156.8	37.9	43.3	43.7	48.1	43.8	45
A0A6P9EW79	Signal recognition particle 54 kDa protein OS=Juglans regia OX=51240 GN=LOC109013936 PE=3 SV=1	41	16	21	6	495	55	9.22	61.78	111.4	110.3	113.9	120.3	115.6	122	79.1	80.5	83	86.2	88.8	88.7
A0A2I4DXA6	Dihydrolipoyllysine-residue succinyltransferase OS=Juglans regia OX=51240 GN=LOC108984324 PE=3 SV=1	17	7	23	2	472	51.6	9.13	75.93	105.2	106.7	107.1	116.2	115.9	112.8	93	95.1	97	84	84.3	82.7
A0A2I4GCQ6	ras-related protein RABE1c-like OS=Juglans regia OX=51240 GN=LOC109006773 PE=4 SV=1	51	10	27	1	216	23.9	7.83	87.87	83.8	90.2	91.9	100.8	88.3	86.4	116.2	111.7	114.2	108.3	106	102.1
A0A2I4GNX5	L-arabinokinase-like OS=Juglans regia OX=51240 GN=LOC109009541 PE=4 SV=1	18	15	26	4	989	108.6	6.43	74.46	147.8	147.6	151.7	136.9	134.3	135.1	51.9	51.6	55.6	63	63.6	60.9
A0A2I4FHN2	Dynamin GTPase OS=Juglans regia OX=51240 GN=LOC108998866 PE=3 SV=1	18	16	28	2	929	100.8	8.87	72.92	120.5	115.6	113.2	109.4	108.4	105.2	102.2	100.3	104.9	71.2	74.3	74.7
A0A2I4H3V4	Inositol-3-phosphate synthase OS=Juglans regia OX=51240 GN=LOC109013248 PE=3 SV=1	24	9	30	2	510	56.3	5.66	81.29	75	78.7	82.3	82	83.5	76.7	107	110.6	110.7	130.8	125.9	136.7
A0A6P9EJH7	ABC transporter E family member 2-like OS=Juglans regia OX=51240 GN=LOC108985436 PE=4 SV=1	17	10	18	2	605	68.2	7.96	59.04	106.7	105.9	111.9	106.3	101	107.4	92.1	85.8	86.1	97.1	98.6	101.1
A0A2I4F0T5	Elongation factor Tu OS=Juglans regia OX=51240 GN=LOC108994485 PE=3 SV=1	27	11	33	2	451	49.1	6.7	86.8	136.7	134.4	129	139.8	140.2	146.9	63.3	63.5	65.3	59.7	61.8	59.3
A0A2I4FHL0	GTP-binding protein YPTM2-like OS=Juglans regia OX=51240 GN=LOC108998851 PE=4 SV=1	53	10	25	3	202	22.6	5.71	78.74	122.1	123.3	125.1	111.1	111.2	114.2	88.5	85.6	87.5	77.3	74.7	79.4
A0A2I4E2Q2	Uridine kinase OS=Juglans regia OX=51240 GN=LOC108985711 PE=3 SV=1	38	17	26	3	486	54.5	6.93	79.85	120	121.9	123.8	128.7	123.7	123.9	71.4	72.2	74.1	78.9	80.5	80.9
A0A6P9DUL7	villin-4-like OS=Juglans regia OX=51240 GN=LOC108979682 PE=3 SV=1	13	12	32	6	961	107.2	6.13	88.91	93.9	93.5	90.9	83.6	83.4	83	129.8	131.9	127.9	95.5	93.5	93
A0A2I4EXX9	Acyl-coenzyme A oxidase OS=Juglans regia OX=51240 GN=LOC108993708 PE=3 SV=1	12	6	16	6	673	75.5	7.85	64.17	30.4	29.8	33.3	29.8	29.7	29	184	185.4	177.5	159.1	154.6	157.3
A0A2I4F2A4	Uridine kinase OS=Juglans regia OX=51240 GN=LOC108994838 PE=3 SV=1	37	16	24	4	484	54.5	6.86	77.47	129	124	122.6	131.2	136.3	128.6	68.7	64.6	67.3	76.5	78.7	72.6
A0A2I4G3T7	Ketol-acid reductoisomerase OS=Juglans regia OX=51240 GN=LOC109004440 PE=3 SV=1	14	7	31	4	589	63.8	7.3	106.08	85.5	82.8	85.6	89.9	90.8	91.8	106.8	106.4	108.1	115.7	117.6	119
A0A2I4E6L0	Dihydrolipoamide acetyltransferase component of pyruvate dehydrogenase complex OS=Juglans regia OX=51240 GN=LOC108986750 PE=3 SV=1	19	6	34	4	471	49.3	8.03	101.71	93.4	94.7	95.7	94.9	91.7	91.6	102.4	100.1	102.2	111.3	110.4	111.6
A0A833XRA7	Uncharacterized protein OS=Juglans regia OX=51240 GN=F2P56_010843 PE=3 SV=1	20	10	30	2	555	63.4	9.25	96.63	34.8	34.8	33.5	34.3	34.6	33.1	161.7	161.7	159.9	172.2	169.3	170.1
A0A2I4EJH6	60S ribosomal protein L12 OS=Juglans regia OX=51240 GN=LOC108990133 PE=3 SV=1	46	7	19	7	166	17.8	8.92	59.53	117.8	116.1	116.5	116.4	120.8	120.1	82.7	78.8	81.1	84.4	83.6	81.7
A0A2I4FCI9	Succinate dehydrogenase [ubiquinone] flavoprotein subunit, mitochondrial OS=Juglans regia OX=51240 GN=LOC108997501 PE=3 SV=1	16	9	26	3	637	70.3	6.57	82.42	124.1	120.7	124.3	118.1	127.5	119.5	73	80.4	84.2	75.3	77.9	75.1
A0A833UXJ2	Uncharacterized protein OS=Juglans regia OX=51240 GN=F2P56_020112 PE=4 SV=1	14	9	17	1	668	75.2	8.19	61.54	134.3	117.9	126	114	113	111.4	87.5	76.3	100.6	77.8	77.2	64
A0A2I4DQA0	UDP-arabinopyranose mutase OS=Juglans regia OX=51240 GN=LOC108982406 PE=3 SV=1	25	10	48	1	374	42.3	6.3	134.39	76	80.5	72.8	64.7	54.5	64.3	133.4	135.9	130.7	126.5	128.3	132.5
A0A2I4E775	DNA damage-binding protein 1 OS=Juglans regia OX=51240 GN=LOC108986907 PE=4 SV=1	16	15	21	15	1089	121.4	5.31	64.6	73.4	78.4	79.4	67.5	66.6	67.8	117.2	122.8	119	135.8	138.9	133.3
A0A2I4GH95	Malic enzyme OS=Juglans regia OX=51240 GN=LOC109007857 PE=3 SV=1	20	11	28	2	643	70.4	6.99	84.65	73.8	76.6	75.4	68.1	71.5	69.7	139.6	138.2	139.8	114.6	116.3	116.3
A0A2I4GNC0	DEAD-box ATP-dependent RNA helicase 8-like OS=Juglans regia OX=51240 GN=LOC109009389 PE=3 SV=1	31	12	20	1	502	57.5	8.4	62.22	114.2	109.3	115.8	157.6	141.1	155.2	64.2	57.5	74	65.8	70.5	74.9
A0A2I4G570	probable methyltransferase PMT26 OS=Juglans regia OX=51240 GN=LOC109004810 PE=3 SV=1	14	10	22	0	836	94.1	5.07	57.18	149.7	147.1	142.9	122	128	135.2	60.7	62.9	63.5	60.8	62	65
A0A2I4GWE8	regulator of nonsense transcripts 1 homolog OS=Juglans regia OX=51240 GN=LOC109011455 PE=3 SV=1	15	14	20	14	1286	140.8	6.89	55.18	95.2	94.9	96.4	89.7	89.3	89.2	115.9	112.5	110.8	98	103.8	104.3
A0A6P9E7R2	Glyceraldehyde-3-phosphate dehydrogenase OS=Juglans regia OX=51240 GN=LOC109004608 PE=3 SV=1	20	8	31	6	426	45.4	9.01	97.48	81.3	80.7	79.7	86.5	88.3	87.8	120.4	117.4	121.2	111.1	114.3	111.3
A0A2I4H515	ubiquitin-conjugating enzyme E2 variant 1D OS=Juglans regia OX=51240 GN=LOC109013548 PE=4 SV=1	61	7	25	7	146	16.6	6.68	71.34	98.3	99.9	98.3	123	113.1	117.8	92.2	97.4	97.8	82.5	88.2	91.2
A0A6P9E600	26S proteasome non-ATPase regulatory subunit 1 homolog OS=Juglans regia OX=51240 GN=LOC118344038 PE=3 SV=1	11	9	20	9	968	105	5.39	61.59	91	88.1	88.7	79.4	80.3	79.3	112.2	116.6	115	116.8	117.2	115.5
A0A2I4DUK0	CCT-theta OS=Juglans regia OX=51240 GN=LOC108983584 PE=3 SV=1	16	7	21	2	544	58.9	5.63	69.74	96	94.2	94.7	86	86	87.5	109.7	108	108.7	108.6	110.7	110
A0A2I4GR53	Glucose-6-phosphate 1-dehydrogenase OS=Juglans regia OX=51240 GN=LOC109010115 PE=3 SV=1	28	14	35	5	526	60.2	6.55	97.07	79.9	81.4	80.7	78.5	77	76.4	125.5	125.7	124.2	118.7	115.5	116.4
A0A2I4FRD5	Dynamin GTPase OS=Juglans regia OX=51240 GN=LOC109001395 PE=3 SV=1	17	16	25	2	930	100.9	8.82	61.65	83.9	86.4	83.9	81	82	81.1	125.3	122.7	124.6	111.4	110.4	107.4
A0A2I4DMK0	40S ribosomal protein S3-2 OS=Juglans regia OX=51240 GN=LOC108981607 PE=3 SV=1	41	12	46	12	232	25.9	9.58	124.71	100.6	99.6	99.1	96.5	97.8	97.3	97.1	98.9	98.7	106.5	104.8	103.2
A0A6P9EDL6	Pyrophosphate--fructose 6-phosphate 1-phosphotransferase subunit beta OS=Juglans regia OX=51240 GN=LOC109002812 PE=3 SV=1	23	12	30	12	564	61.2	6.11	85.86	39.5	39.9	40.8	42.1	43.5	42.5	150.1	152.1	143.5	171.3	168.1	166.7
A0A2I4FXM0	ATP-dependent zinc metalloprotease FTSH, chloroplastic-like OS=Juglans regia OX=51240 GN=LOC109002917 PE=3 SV=1	29	15	17	15	717	76.6	6.61	52.55	59.6	61.1	61.7	65.5	64.5	62.2	134.3	136.7	129.9	140.9	141.7	141.9
A0A2I4EY51	dynamin-related protein 5A OS=Juglans regia OX=51240 GN=LOC108993767 PE=3 SV=1	28	16	26	2	610	68.3	7.99	70.8	76.3	77.1	77.9	84.2	84.3	83.1	128.7	128.5	127.6	109.8	110.9	111.7
A0A2I4GCW5	ATP-dependent zinc metalloprotease FTSH 10, mitochondrial-like OS=Juglans regia OX=51240 GN=LOC109006807 PE=3 SV=1	20	14	21	7	820	90.1	7.96	63.08	132.2	135.8	138.1	144.4	144.2	144.5	59.3	58.8	61.6	61.9	59.7	59.6
A0A2I4GLZ1	DEAD-box ATP-dependent RNA helicase 8-like OS=Juglans regia OX=51240 GN=LOC109009037 PE=3 SV=1	30	12	20	1	500	57	8.4	57.6	99.2	104.1	103.5	114.4	110.2	113.5	86.5	88.7	91.1	97.7	94.5	96.5
A0A2I4DXM6	aspartic proteinase-like isoform X2 OS=Juglans regia OX=51240 GN=LOC108984384 PE=3 SV=1	18	7	26	5	514	56.1	5.38	85.54	50.5	51.2	52.4	55.1	56	54	115.8	118.9	116.9	174.4	176.8	178.1
A0A2I4H663	Fructose-bisphosphatase OS=Juglans regia OX=51240 GN=LOC109013864 PE=3 SV=2	17	5	19	1	340	37.1	6.37	67.39	171.8	169.7	172.1	143	154.5	156.9	35.8	34.3	37.6	40.5	42.5	41.4
A0A2I4FA78	trans-cinnamate 4-monooxygenase-like OS=Juglans regia OX=51240 GN=LOC108996947 PE=3 SV=1	22	10	31	0	505	57.8	8.91	97.08	39.5	46.3	40.2	40.3	33.3	37	179.8	187	159.2	155.9	138.9	142.5
A0A2I4H105	Malate dehydrogenase OS=Juglans regia OX=51240 GN=LOC109012566 PE=3 SV=1	25	7	29	5	342	36	8.34	94.23	106.2	107.3	104.2	101.3	105.2	103.9	97.5	95.5	97.1	98	92.4	91.4
A0A2I4GHZ7	ras-related protein RABH1b-like OS=Juglans regia OX=51240 GN=LOC109008041 PE=4 SV=1	41	8	23	3	208	23.2	7.91	72.91	93.6	96.9	94.6	78.3	82.3	78.9	125.3	129.9	127.2	99.9	97	96.1
A0A2I4E4X5	Phosphoribosylformylglycinamidine synthase OS=Juglans regia OX=51240 GN=LOC108986326 PE=3 SV=1	9	11	28	11	1411	154.8	5.95	72.32	92.2	96	98.4	79.9	77.5	76.9	117.5	117.1	112.8	111.3	109.9	110.4
A0A6P9EKG4	26S proteasome non-ATPase regulatory subunit 6 homolog OS=Juglans regia OX=51240 GN=LOC118343734 PE=4 SV=1	26	9	18	9	384	44.5	6.13	54.85	83.4	83.9	82.1	76.5	78.3	79.4	123	119.6	115.5	123.7	116.9	117.7
A0A2I4DQW1	Glyceraldehyde-3-phosphate dehydrogenase OS=Juglans regia OX=51240 GN=LOC108982574 PE=3 SV=1	25	9	61	2	341	37.1	8.51	167.4	64.6	67.7	66.5	68.8	66.3	68.1	138.2	132.9	129.3	135.4	128.2	134.1
A0A2I4GA71	heat shock 70 kDa protein 15-like OS=Juglans regia OX=51240 GN=LOC109006102 PE=4 SV=2	8	6	31	2	856	94.9	5.22	95.02	106	124.3	107	99.3	97	100	97.4	99.2	109.8	83.7	88	88.4
A0A2I4H2C7	Obg-like ATPase 1 OS=Juglans regia OX=51240 GN=LOC109012876 PE=3 SV=1	34	12	26	12	394	44.5	6.55	83.39	95.8	95.8	98	94.3	94.8	92.4	108.6	107.4	104.8	104.4	101.6	102
A0A2I4G7L7	alcohol dehydrogenase OS=Juglans regia OX=51240 GN=LOC109005402 PE=3 SV=1	29	8	26	1	380	41.2	7.23	74.45	92.7	92.9	95.8	95.5	91.5	91.6	95.8	105.5	101.8	109	114.7	113.3
A0A2I4E1K5	AP-2 complex subunit alpha OS=Juglans regia OX=51240 GN=LOC108985439 PE=3 SV=1	15	14	24	14	1020	113.5	6.1	69.92	75.3	75.4	75.6	75.7	74.6	72	137.7	134.9	134.1	112	116	116.6
A0A2I4H6V9	Ubiquitin carboxyl-terminal hydrolase OS=Juglans regia OX=51240 GN=LOC109014025 PE=3 SV=1	18	11	20	11	808	89.6	5.1	58.76	102.2	103.5	99.8	99.3	99	99.5	99.4	97.4	102.8	99.7	99.7	97.8
A0A2I4F7L1	probable methyltransferase PMT26 OS=Juglans regia OX=51240 GN=LOC108996285 PE=3 SV=1	14	9	22	3	828	93.7	4.92	57.54	168.1	169.1	167.1	135.1	123.8	135.7	48.5	53.2	53.2	48.1	48.3	49.7
A0A833U507	Asparagine synthase (glutamine-hydrolyzing) OS=Juglans regia OX=51240 GN=F2P56_032305 PE=4 SV=1	16	10	26	6	650	73	6.68	84.39	90.1	93.9	92.9	87.7	86.7	87.1	90.9	90.3	89.8	131.3	130.5	129
A0A2I4HN04	dynamin-related protein 5A-like OS=Juglans regia OX=51240 GN=LOC109019652 PE=3 SV=1	26	15	26	3	610	68.5	8.21	72.33	50.9	44.7	47.1	44.4	43.9	51.5	158	154.8	153.9	147.9	154.1	148.7
A0A2I4ECY8	3-ketoacyl-CoA thiolase 2, peroxisomal OS=Juglans regia OX=51240 GN=LOC108988454 PE=3 SV=1	16	4	14	4	461	48.6	7.83	53.27	138	133.6	143.7	146.4	144.4	140.7	45.5	49.1	54.8	67	68.5	68.3
A0A2I4FB83	Acetyl-CoA carboxylase OS=Juglans regia OX=51240 GN=LOC108997211 PE=4 SV=2	11	17	20	3	2258	251.2	6.34	61.69	74.2	76.7	73.6	75.8	73.1	74.5	135.1	135.6	133.6	112.8	117.7	117.3
A0A2I4GH14	Fructose-bisphosphate aldolase OS=Juglans regia OX=51240 GN=LOC109007785 PE=3 SV=1	21	7	22	6	390	42.4	8.44	74.42	93.7	91.9	89.6	95.4	96.6	98.7	100.9	101.9	100.4	108.9	112.5	109.5
A0A2I4GZF9	Succinate--CoA ligase [ADP-forming] subunit alpha, mitochondrial OS=Juglans regia OX=51240 GN=LOC109012218 PE=3 SV=2	33	9	21	9	332	34.6	8.57	61.5	129.3	130	127.4	111.2	112.8	117	85.2	86.2	87.6	72.5	72.3	68.6
A0A6P9EJ64	importin beta-like SAD2 isoform X2 OS=Juglans regia OX=51240 GN=LOC108987333 PE=4 SV=1	12	9	17	4	1032	118.7	4.93	55.69	58.9	64.8	59.9	59.4	58.9	60.7	161.4	153.3	152	121.4	124.2	125
A0A6P9ESR3	Proteasome subunit alpha type OS=Juglans regia OX=51240 GN=LOC108992590 PE=3 SV=1	38	9	31	9	249	27.3	6.43	85.31	77.7	76.2	75.6	76	73.8	72.5	122.2	121.6	121.1	128.9	126.5	128
A0A6P9ESC4	Aminomethyltransferase OS=Juglans regia OX=51240 GN=LOC109012562 PE=3 SV=1	23	8	25	2	408	44.3	8.68	78.39	117.9	114.7	130.1	123.5	124.6	123.4	82.7	81.3	72.3	76.6	77.3	75.4
A0A2I4FWD5	V-type proton ATPase subunit OS=Juglans regia OX=51240 GN=LOC109002594 PE=3 SV=1	27	8	22	8	351	40.6	5.01	69.67	93.6	94.8	87.2	88.8	91.8	85.4	108.8	109.5	108.9	109.4	110.2	111.6
A0A2I4H645	Glycerol-3-phosphate dehydrogenase OS=Juglans regia OX=51240 GN=LOC109013849 PE=3 SV=1	14	7	36	1	630	68.5	8.47	104.21	168.3	175.6	175.4	175.7	175.9	175.9	23.4	19.5	26.2	29.1	27.3	27.8
A0A2I4DM54	Malate dehydrogenase OS=Juglans regia OX=51240 GN=LOC108981475 PE=3 SV=1	23	7	30	3	332	35.7	6.93	98.03	103.5	103.9	105	104.5	100.1	102.8	93.2	90.8	92.7	101.1	100.9	101.6
A0A6P9E6N1	stromal 70 kDa heat shock-related protein, chloroplastic-like OS=Juglans regia OX=51240 GN=LOC109005180 PE=3 SV=1	16	10	24	1	696	74.3	5.99	73.6	80.3	88	95.3	102.8	80.8	95.6	102.3	100	103.4	112.5	119.5	119.6
A0A2I4G0A9	Phosphoglycerate kinase OS=Juglans regia OX=51240 GN=LOC109003587 PE=3 SV=1	18	7	32	3	406	42.8	6.01	93.3	96.6	95.1	102.8	103.9	98.7	100.9	95.5	90.8	93.7	101.8	110.5	109.7
A0A2I4ETI1	Non-reducing end alpha-L-arabinofuranosidase OS=Juglans regia OX=51240 GN=LOC108992575 PE=3 SV=1	6	4	24	4	676	74.5	5.52	81.55	78.6	77.9	76	59	58	58.9	130.3	131.5	130.9	130.3	134.7	134
A0A2I4FJF8	Malic enzyme OS=Juglans regia OX=51240 GN=LOC108999352 PE=3 SV=1	15	8	23	8	603	66.4	7.09	69.1	70.2	69.7	71.4	70.8	70.1	71	139.3	139.6	136.6	119.2	120.8	121.2
A0A2I4DP08	Eukaryotic translation initiation factor 3 subunit E OS=Juglans regia OX=51240 GN=LOC108982059 PE=3 SV=1	27	9	21	9	437	51.2	5.97	75.85	108	105	107.3	108.1	110.2	106.6	92.4	89.4	88	93.7	96.4	95
A0A2I4GRG1	ras-related protein RABB1b OS=Juglans regia OX=51240 GN=LOC109010185 PE=4 SV=1	57	9	17	2	211	23.3	7.4	58.39	106.6	111.4	109.1	104.1	91.3	102.1	99.9	108.6	110.3	80.7	85.8	90.2
A0A833XUQ9	RmlD_sub_bind domain-containing protein (Fragment) OS=Juglans regia OX=51240 GN=F2P56_004917 PE=4 SV=1	22	7	34	3	374	41.7	8.91	91.84	154.2	155.3	145.7	126.8	129.1	122.5	61.2	61.2	62.2	64.5	58	59.3
A0A2I4G1K4	endoplasmin homolog OS=Juglans regia OX=51240 GN=LOC109003886 PE=3 SV=1	15	15	43	13	826	94.2	5	121.76	132.1	131.2	128.7	144.9	151.1	144.9	61.9	61.8	64.1	61.7	59.4	58.1
A0A2I4F910	60S ribosomal protein L9 OS=Juglans regia OX=51240 GN=LOC108996599 PE=3 SV=1	34	6	29	3	193	21.9	9.38	95.71	111.8	110.9	110.4	105.4	100.2	109	84	86.5	86.7	98.2	99.5	97.5
A0A2I4DIE4	AP-2 complex subunit mu OS=Juglans regia OX=51240 GN=LOC108980448 PE=3 SV=1	40	15	18	15	438	49.3	9.19	52.56	74.2	75.2	75.2	70.8	67.5	68.4	127.7	124.2	130.1	128.4	129.5	128.8
A0A2I4GZU8	ubiquitin-conjugating enzyme E2 36 OS=Juglans regia OX=51240 GN=LOC109012315 PE=3 SV=1	71	7	20	7	153	17.2	7.34	61.48	105.4	107.3	110.9	133.2	134.1	133.4	80.6	86.1	82.7	74.3	75.7	76.2
A0A2I4G6T6	chaperone protein ClpB4, mitochondrial OS=Juglans regia OX=51240 GN=LOC109005234 PE=3 SV=1	11	8	15	4	981	110.3	7.46	48.63	121.3	118.5	111.9	116.4	116	117.3	80.5	85.3	87.8	81.1	82.9	81.1
A0A2I4H6G8	Signal recognition particle 54 kDa protein OS=Juglans regia OX=51240 GN=LOC109013924 PE=3 SV=1	32	13	16	3	494	54.9	9.01	47.24	120.4	129.5	125.3	121	114.2	114.4	72.7	75.2	75.6	80.6	88.3	82.7
A0A2I4F752	D-3-phosphoglycerate dehydrogenase OS=Juglans regia OX=51240 GN=LOC108996167 PE=3 SV=1	13	7	37	2	597	63.1	7.49	103.85	74.8	74.9	75.6	71.7	76.1	76.8	123.6	121.8	115.2	135.9	127.4	126.1
A0A6P9EEB4	CCT-theta OS=Juglans regia OX=51240 GN=LOC109010562 PE=3 SV=1	13	6	22	1	543	58.8	5.62	72.71	96.2	100.8	107.5	88.4	82.9	86.9	104.3	100.6	98.5	98	139	96.8
A0A2I4FIX0	aldehyde dehydrogenase family 2 member B4, mitochondrial isoform X2 OS=Juglans regia OX=51240 GN=LOC108999220 PE=3 SV=1	22	9	18	5	536	58.7	7.27	57.24	42	42.7	41.8	44.4	47.1	45.4	146.5	149.1	141.9	170	165.6	163.6
A0A2I4DX03	60S ribosomal protein L3-like OS=Juglans regia OX=51240 GN=LOC108984237 PE=3 SV=1	24	13	34	3	389	44.5	10.15	91.17	167.6	170.8	172.6	140.1	144.4	147	37.3	39.1	44.6	47.2	44.7	44.5
A0A2I4DLS2	Glutamate dehydrogenase OS=Juglans regia OX=51240 GN=LOC108981408 PE=3 SV=1	19	7	16	2	411	44.8	6.64	52.77	72.9	67.2	71.1	60.2	61.4	65.7	118.5	116.9	114.4	148.6	152.1	150.9
A0A2I4DYU6	ubiquitin-40S ribosomal protein S27a OS=Juglans regia OX=51240 GN=LOC108984724 PE=3 SV=1	62	10	101	4	156	17.7	9.79	216.95	116.5	117.4	114.2	120.7	122.7	120.9	78.3	79.6	83.2	82.9	81.8	81.7
A0A2I4FTS6	Proteasome subunit alpha type OS=Juglans regia OX=51240 GN=LOC109001970 PE=3 SV=1	29	9	22	9	246	27.4	6.32	68.25	75.7	72.4	75.3	75.5	76.5	77.8	120.8	120.9	118.4	133	126.5	127.3
A0A2I4HPJ6	5-oxoprolinase OS=Juglans regia OX=51240 GN=LOC109020112 PE=3 SV=1	11	12	20	12	1268	138.3	6.02	59.88	77.5	77.8	78	79.5	77.6	79	120.3	117.3	115.6	126.4	128	123
A0A2I4DUN9	leucine aminopeptidase 1-like OS=Juglans regia OX=51240 GN=LOC108983616 PE=3 SV=1	13	5	18	2	578	60.3	6.18	58.82	18.5	19.7	17	23.4	22.2	25	178.2	172.6	177	172.3	187.3	186.8
A0A2I4DVQ9	dynamin-related protein 3A OS=Juglans regia OX=51240 GN=LOC108983905 PE=3 SV=1	15	12	17	5	827	91.3	7.09	58.32	120.5	121	125.6	127.7	123.8	129.9	74.5	71.5	77.8	77.4	75.1	75.2
A0A2I4FQB7	110 kDa U5 small nuclear ribonucleoprotein component CLO OS=Juglans regia OX=51240 GN=LOC109001135 PE=3 SV=1	15	13	20	13	990	110.7	5.17	58.26	68.8	69.7	70	72.1	70.8	67.8	125.4	122	125.7	135.2	136.2	136.4
A0A2I4GND2	Inositol-3-phosphate synthase OS=Juglans regia OX=51240 GN=LOC109009394 PE=3 SV=2	23	9	29	2	510	56.4	6.18	73.49	178.4	178.2	171.5	146.4	143.7	145.2	31.7	33	37.6	44.3	45.2	44.8
A0A6P9EHE5	Cysteine synthase OS=Juglans regia OX=51240 GN=LOC109007288 PE=3 SV=1	20	5	35	2	331	35.1	5.43	99.53	72.9	73	73.7	74.2	78.9	78.1	123.7	123.9	121.9	125.6	126.4	127.7
A0A2I4H7P1	26S proteasome non-ATPase regulatory subunit 11 homolog OS=Juglans regia OX=51240 GN=LOC109014234 PE=3 SV=1	29	10	26	1	422	47.1	6.11	65.74	84.9	79.6	78.8	86.2	86.4	82.5	122.7	126.1	122.1	109	106.6	115
A0A2I4FYH4	Proteasome subunit beta OS=Juglans regia OX=51240 GN=LOC109003145 PE=3 SV=1	33	6	15	6	272	29.2	5.49	55.87	67.4	70.6	76.5	63.3	68.1	65.9	142.7	137.4	126.9	138.3	126.5	116.4
A0A833TSZ3	Uncharacterized protein OS=Juglans regia OX=51240 GN=F2P56_031972 PE=3 SV=1	17	7	19	3	440	48.8	6.68	72.17	106.5	107.3	102.7	107	105.6	105.8	95.1	98.2	96.8	89.7	94	91.2
A0A2I4FIR2	caffeoyl-CoA O-methyltransferase 5 OS=Juglans regia OX=51240 GN=LOC108999180 PE=3 SV=1	30	5	14	5	247	27.8	5.52	45.33	30.3	31.3	29.3	34.3	32.1	33	145	145.2	142.2	180.7	199.3	197.2
A0A833UDR9	Glucose-6-phosphate 1-epimerase (Fragment) OS=Juglans regia OX=51240 GN=F2P56_025842 PE=3 SV=1	21	10	15	6	339	37.3	6.27	50.84	78.4	78.4	79.1	68.6	66.4	69	126.4	125.1	124.2	127.6	129.6	127.3
A0A2I4DKJ0	casein kinase II subunit alpha-2 OS=Juglans regia OX=51240 GN=LOC108981052 PE=3 SV=1	33	11	19	8	407	47	8.41	47.83	88.4	88.7	90.3	91	87.4	91.7	108.4	109.3	109.3	106.3	115.1	114.1
A0A2I4HQU5	ATP-dependent zinc metalloprotease FTSH 4, mitochondrial-like OS=Juglans regia OX=51240 GN=LOC109020493 PE=3 SV=1	18	9	20	1	717	77.4	8.6	52.49	108.8	93.7	112.8	152.4	127.3	115.3	79.4	75.6	67.8	90.5	85.7	90.9
A0A2I4DGM3	Phosphopyruvate hydratase OS=Juglans regia OX=51240 GN=LOC108979951 PE=3 SV=1	19	6	17	6	488	52.3	6.74	59.8	37.1	38.1	38.1	38.5	42.2	40.7	153.9	154.3	152.9	172.4	167.6	164.4
A0A833UXN6	Uncharacterized protein OS=Juglans regia OX=51240 GN=F2P56_017763 PE=3 SV=1	30	12	45	12	288	33.4	10.11	111.34	109.9	108.3	110.4	105.1	111.9	105.6	85.8	82.7	87	104	98.5	90.9
A0A2I4GA24	3-ketoacyl-CoA thiolase 2, peroxisomal-like OS=Juglans regia OX=51240 GN=LOC109006047 PE=3 SV=1	10	3	16	3	460	48.4	7.97	61.13	138.2	139	141.1	141.7	134.1	135.4	51.9	50.6	51.1	74.4	70	72.4
A0A2I4DLV8	Methyltransferase OS=Juglans regia OX=51240 GN=LOC108981418 PE=3 SV=1	19	11	25	3	625	71.3	6.46	77.4	169.4	171.2	163.7	150.2	148.3	150.2	40.4	39.2	43.7	41	42.3	40.3
A0A2I4FRJ4	26S proteasome non-ATPase regulatory subunit 2 homolog OS=Juglans regia OX=51240 GN=LOC109001453 PE=3 SV=1	19	15	26	2	884	97.2	5.14	65.3	97.4	98.2	97.3	85.2	86.1	89.4	110.5	111.7	110.5	103.1	105.3	105.2
A0A833UQ19	Malic enzyme OS=Juglans regia OX=51240 GN=F2P56_025935 PE=3 SV=1	18	8	23	5	577	63.5	7.17	62.19	115.9	127.5	126	113.5	114.2	125.3	87.3	87.7	86	72.7	71.9	71.9
A0A2I4G6K3	Protein-serine/threonine phosphatase OS=Juglans regia OX=51240 GN=LOC109005189 PE=3 SV=1	42	10	18	10	292	31.5	5	59.33	139.9	137.9	138.1	152.6	146.5	148.2	55.4	55.2	57.3	57.5	56.5	54.8
A0A2I4EZH8	Fumarate hydratase OS=Juglans regia OX=51240 GN=LOC108994152 PE=3 SV=1	31	10	20	10	492	53.2	8.15	59.77	128.1	131.2	137.6	124.6	128.1	124.5	74.6	77.8	71.4	68.6	66	67.6
A0A2I4DZV2	Fructose-bisphosphate aldolase OS=Juglans regia OX=51240 GN=LOC108985009 PE=3 SV=2	15	7	41	2	358	38.6	7.39	125.41	107.3	108.6	105.2	100.9	103.9	101	99.7	96.5	95.5	98.4	91.6	91.4
A0A2I4ERK8	60S ribosomal protein L8-3 OS=Juglans regia OX=51240 GN=LOC108992041 PE=3 SV=1	37	8	27	8	260	28.2	10.89	83.49	120.4	121.2	118.1	118.8	124.4	125	65.9	66.2	69.3	91.1	90.6	89.1
A0A2I4HT09	HECT-type E3 ubiquitin transferase OS=Juglans regia OX=51240 GN=LOC109021170 PE=4 SV=1	4	14	18	4	3683	405.4	5.22	56.24	95.3	95.8	95.7	99.7	99	96.9	104.9	106	103.5	100.2	100.9	102.1
A0A6P9DTC9	protein ILITYHIA OS=Juglans regia OX=51240 GN=LOC108995775 PE=3 SV=1	5	13	21	13	2614	285.4	6.77	53.84	120.3	118.2	119.2	126.6	125.9	124.4	76.5	78.3	78.9	75.8	79.7	76.1
A0A2I4DRG6	isocitrate dehydrogenase [NAD] regulatory subunit 1, mitochondrial OS=Juglans regia OX=51240 GN=LOC108982735 PE=3 SV=1	29	8	16	8	364	39.7	7.74	59.71	116.3	120.4	117.2	118.8	121.8	122.3	75.7	76.7	78.8	83.6	84.1	84.3
A0A2I4GA01	Alanine--tRNA ligase OS=Juglans regia OX=51240 GN=LOC109006031 PE=3 SV=1	12	10	19	10	1010	110.9	6.06	49.9	90.9	93.5	96.8	84.5	90.2	87.9	112.5	106.9	100.7	117.7	112.6	105.8
A0A833XGS7	Phospholipase D OS=Juglans regia OX=51240 GN=F2P56_016636 PE=3 SV=1	15	12	32	3	725	82.6	5.74	85.59	98.6	104.3	100.1	84.7	91.1	90.3	106.4	110.9	102.3	106.1	102	103.2
A0A6P9EMW2	Phospholipase D OS=Juglans regia OX=51240 GN=LOC108995583 PE=3 SV=1	7	5	29	2	806	92.1	6.98	94.34	87.2	92.5	89.4	86.7	87.7	85.9	105.3	109.1	110.9	107.9	120.6	116.8
A0A2I4FS61	Asparagine synthetase [glutamine-hydrolyzing] OS=Juglans regia OX=51240 GN=LOC109001576 PE=4 SV=1	12	6	16	4	584	65.8	6.38	62.64	74.9	78.4	74.3	81.8	77.8	77.6	112.8	115.4	112.5	130.7	131.6	132.3
A0A2I4E218	Oligopeptidase A OS=Juglans regia OX=51240 GN=LOC108985549 PE=3 SV=1	18	11	17	11	780	87.4	6.39	60.63	113.2	111.3	111.9	100.4	103.9	106.4	87.1	85.1	86.8	96.2	99.4	98.2
A0A2I4H163	heat shock protein 90-6, mitochondrial isoform X2 OS=Juglans regia OX=51240 GN=LOC109012623 PE=3 SV=1	16	11	25	8	800	90.5	5.41	81.1	99.8	99.3	99.8	136.3	132.6	129	81.8	83.7	84.5	84.3	85.1	83.8
A0A6P9EI48	Dihydropyrimidine dehydrogenase (NADP(+)) OS=Juglans regia OX=51240 GN=LOC108983065 PE=3 SV=1	24	8	14	8	424	46.2	6.01	48.35	57.8	56.2	59.8	62.2	61	63.2	144.4	143.7	146	135.4	134.7	135.5
A0A834D821	Clp R domain-containing protein OS=Juglans regia OX=51240 GN=F2P56_000993 PE=3 SV=1	14	10	16	6	934	105.1	5.97	44.85	91	91.1	91.9	90.7	86.7	91.3	115.5	113.5	115.9	105.4	101.5	105.6
A0A2I4DKK5	3-isopropylmalate dehydratase OS=Juglans regia OX=51240 GN=LOC108981067 PE=4 SV=1	17	7	18	7	509	55.5	7.49	48.3	74.5	73.3	75.9	82.2	84.2	83.2	113.1	115	112.5	127.2	127.6	131.3
A0A2I4HEW3	ras-related protein RABD1 OS=Juglans regia OX=51240 GN=LOC109016744 PE=4 SV=1	49	8	22	5	201	22.4	5.27	75.05	77.9	81.2	80.2	81.4	76.6	81.1	128.7	128.6	128.9	109.2	112.8	113.3
A0A2I4E350	Vesicle-fusing ATPase OS=Juglans regia OX=51240 GN=LOC108985847 PE=3 SV=1	29	10	15	10	435	48.3	7.55	49.14	92.8	97.1	96.6	104.3	99.5	101.9	102.4	99.4	101.5	98.9	102.8	102.8
A0A2I4EXW1	Proteasome subunit beta OS=Juglans regia OX=51240 GN=LOC108993702 PE=3 SV=1	14	3	17	3	243	27.2	7.12	61.69	72	71.9	74.5	74.7	74.8	74.6	122.4	125	121.7	128.1	129	131.2
A0A2I4EVS2	calmodulin OS=Juglans regia OX=51240 GN=LOC108993157 PE=4 SV=1	50	10	39	3	149	16.9	4.27	100.6	25.9	24.1	25	30.9	30.9	34.1	173.6	185.5	176	164.2	160.7	169.2
A0A6P9F9E8	14-3-3-like protein GF14 kappa OS=Juglans regia OX=51240 GN=LOC108985215 PE=3 SV=1	33	10	40	2	252	28.4	4.82	96.72	56.7	55.9	56.5	56.6	59.2	59.2	157.2	157.6	152.1	132.1	128.1	128.7
A0A833V0M2	Uncharacterized protein (Fragment) OS=Juglans regia OX=51240 GN=F2P56_017969 PE=3 SV=1	32	11	32	6	288	32.8	10.83	71.76	179.9	175.8	180.9	138.2	136.9	135.9	41.9	42.4	44.8	40.8	40.7	41.8
A0A2I4HUF9	alpha-xylosidase 1-like OS=Juglans regia OX=51240 GN=LOC109021577 PE=3 SV=1	13	11	24	11	934	104.1	6.38	68.67	77.3	76.7	78	69.1	71.3	69.9	142.8	141.4	138.5	114	111.3	109.7
A0A2I4G7L5	alcohol dehydrogenase 1 OS=Juglans regia OX=51240 GN=LOC109005403 PE=3 SV=1	25	9	41	2	380	41.1	6.6	102.96	92	89.7	89.9	85.7	88.5	87.3	106.9	110.6	107.7	115.4	112.7	113.6
A0A2I4EWT1	probable 26S proteasome non-ATPase regulatory subunit 3 OS=Juglans regia OX=51240 GN=LOC108993405 PE=3 SV=1	26	14	24	1	487	55.5	8.88	72.47	108.4	94	100.8	100.6	83.6	98	91	105.9	100.3	116.6	100	100.7
A0A2I4F286	Importin subunit alpha OS=Juglans regia OX=51240 GN=LOC108994832 PE=3 SV=1	20	11	21	3	532	58.7	5.39	71.95	77.2	77.4	76.2	72.6	74.7	75.3	146	147.2	132.6	111.7	103	106.2
A0A2I4F2N7	ERBB-3 BINDING PROTEIN 1 isoform X1 OS=Juglans regia OX=51240 GN=LOC108994931 PE=3 SV=2	25	10	22	6	395	43.6	6.7	60.74	126.5	129.3	126.7	115.2	121.6	122	80	79.9	80.6	74.8	73.2	70.2
A0A6P9EM89	trifunctional UDP-glucose 4,6-dehydratase/UDP-4-keto-6-deoxy-D-glucose 3,5-epimerase/UDP-4-keto-L-rhamnose-reductase RHM1-like OS=Juglans regia OX=51240 GN=LOC109000206 PE=4 SV=1	12	7	39	2	672	75.3	7.3	102.09	162.3	165.4	165.8	140.4	136	141.9	51.5	49.5	51.9	46	43.6	45.6
A0A2I4GY71	RNA helicase OS=Juglans regia OX=51240 GN=LOC109011920 PE=4 SV=1	16	10	28	2	619	67.4	8.46	73.1	130	124.7	131.1	122	119	117.5	79	78.3	69.4	79.4	79.3	70.2
A0A2I4GLQ1	Adenosine kinase OS=Juglans regia OX=51240 GN=LOC109008967 PE=3 SV=1	19	5	41	5	341	37.4	5.44	136.2	66.3	65	66	65.3	61.5	63.1	115.1	116.4	114.6	152.9	155.2	158.8
A0A2I4G6R8	NADP-dependent glyceraldehyde-3-phosphate dehydrogenase OS=Juglans regia OX=51240 GN=LOC109005232 PE=3 SV=2	30	12	16	5	496	53.2	7.36	50.03	31.7	31.3	31.8	33.8	32.6	33.3	168.6	164.3	158	171.4	172.1	171.1
A0A2I4EHG3	dynamin-related protein 1E OS=Juglans regia OX=51240 GN=LOC108989622 PE=3 SV=1	23	10	18	2	614	68.6	7.33	55.31	77.4	76.8	75.7	87.3	80.8	82.5	124.4	124.6	123.2	113.7	116.6	116.9
A0A2I4DLC0	Serine hydroxymethyltransferase OS=Juglans regia OX=51240 GN=LOC108981297 PE=3 SV=2	20	9	32	3	515	57	8.28	89.84	103.5	101	102	102.6	105.9	103.3	88.9	91.2	92.9	103.8	103.6	101.4
A0A2I4GHW0	26S proteasome non-ATPase regulatory subunit 2 homolog OS=Juglans regia OX=51240 GN=LOC109008001 PE=3 SV=2	16	14	24	1	884	97.3	5.21	56.84	92.4	93.6	85.5	100.7	96.8	98.2	101.4	90.3	106.2	116.2	111.5	107.4
A0A2I4DX32	Vacuolar protein sorting-associated protein 11 homolog OS=Juglans regia OX=51240 GN=LOC108984271 PE=3 SV=2	15	13	19	13	957	108.3	6.15	58.5	83	85.7	87.9	83.5	79.7	80.2	119.3	121.5	119.2	114.4	113.6	112
A0A2I4H6P5	beta-glucosidase BoGH3B-like OS=Juglans regia OX=51240 GN=LOC109013987 PE=4 SV=1	14	7	19	1	627	68.1	8.92	53.93	147.8	144.5	145.2	119	111.7	116.7	67.7	65.3	72.4	69.6	68.5	71.5
A0A2I4GEG7	Methyltransferase OS=Juglans regia OX=51240 GN=LOC109007173 PE=3 SV=1	17	9	23	1	625	71.3	6.4	73.07	77.3	85.9	83.8	73.2	74.5	88.7	114.6	129.3	118.3	108.1	107.4	138.9
A0A2I4DQK8	importin-5-like OS=Juglans regia OX=51240 GN=LOC108982486 PE=4 SV=1	13	11	19	1	1116	123.4	4.91	53.61	52.2	57.4	50	59.4	64.8	58.8	169.1	157.3	163	127.3	121.4	119.5
A0A2I4EH32	uncharacterized protein LOC108989521 OS=Juglans regia OX=51240 GN=LOC108989521 PE=4 SV=1	10	11	21	11	1191	128.8	5.62	59.8	88	88.3	88.8	90	86.4	84.8	126	124.8	123.2	99.9	99.4	100.6
A0A2I4GMG4	L-arabinokinase-like OS=Juglans regia OX=51240 GN=LOC109009157 PE=4 SV=2	14	12	22	1	989	108.8	5.92	61.29	138.3	101	117.7	113.5	96.5	95.7	87.6	82.6	93.2	123.7	71.3	78.8
A0A833UXT6	Xylose isomerase OS=Juglans regia OX=51240 GN=F2P56_017847 PE=3 SV=1	12	5	23	5	504	56.6	6.49	67.76	161	165.2	160.9	168.1	173.8	168.7	27.1	29.1	35	37.3	36.9	36.9
A0A833XHS6	Uncharacterized protein OS=Juglans regia OX=51240 GN=F2P56_017292 PE=3 SV=1	33	11	35	1	302	34.1	10.37	81.69	132	157.1	178.4	112.8	122.1	134.5	42.2	46.8	43.6	101.9	64.8	63.9
A0A2I4GL90	ATP-dependent zinc metalloprotease FTSH 4, mitochondrial-like OS=Juglans regia OX=51240 GN=LOC109008867 PE=3 SV=1	17	9	20	1	721	77.9	7.99	48.55	103.3	102.5	103.7	118.5	115.9	116	88.6	90.5	93.6	86.5	92	88.9
A0A2I4H061	Calcium-transporting ATPase OS=Juglans regia OX=51240 GN=LOC109012392 PE=3 SV=2	6	7	18	2	1022	111.1	5.74	54.81	199.2	200.3	211.4	153.5	168.3	165.8	13.3	15.6	18.5	21.3	14.7	18
A0A2I4EHY8	Alanine transaminase OS=Juglans regia OX=51240 GN=LOC108989739 PE=3 SV=1	23	11	19	11	481	53.4	6.99	44.56	109.8	110.5	109	118	115.1	115.8	78	75.5	76.3	96.4	98.8	96.8
A0A2I4H0H8	Acetyl-CoA carboxylase OS=Juglans regia OX=51240 GN=LOC109012459 PE=4 SV=1	9	15	18	1	2268	252.4	6.44	48.29	92.8	85.2	85.3	80.6	68.1	77.8	116.2	115.2	112.3	114.2	122.3	129.9
A0A833X223	60S acidic ribosomal protein P0 OS=Juglans regia OX=51240 GN=F2P56_028546 PE=3 SV=1	25	8	29	6	309	33.4	5.16	81.23	111.9	109.1	106.1	106.9	102.6	109.3	87.9	92.8	92.4	94.3	92.7	94.1
A0A2I4GP85	Aspartate--tRNA ligase OS=Juglans regia OX=51240 GN=LOC109009608 PE=3 SV=1	20	10	23	10	558	62.4	6.05	63.02	99.5	100.5	96.6	85.6	88.8	85.8	107.2	107.3	104.2	109	106.3	109.2
A0A834D1B1	Uncharacterized protein OS=Juglans regia OX=51240 GN=F2P56_008720 PE=4 SV=1	14	7	19	0	628	68.8	7.53	54.06	177.7	172.1	164.7	152.7	160.1	158.5	35.7	33.9	36.6	38.1	33.9	36.1
A0A2I4H7P7	Methyltransferase OS=Juglans regia OX=51240 GN=LOC109014247 PE=3 SV=2	18	9	18	4	600	68.6	8.38	57.06	152.1	158.5	159.3	155.3	157	154.6	49.9	47.8	48.6	37.9	39.8	39.2
A0A2I4F248	translationally-controlled tumor protein homolog OS=Juglans regia OX=51240 GN=LOC108994805 PE=3 SV=1	55	8	17	5	168	19	4.56	51.68	95.3	90.7	94.3	103.5	96.1	103.3	101	104.5	100.3	99.4	106.5	105.1
A0A834D4L3	Ribos_L4_asso_C domain-containing protein OS=Juglans regia OX=51240 GN=F2P56_007678 PE=3 SV=1	20	8	27	2	374	41.6	10.51	74.01	158.6	161.5	161.8	165.9	160.8	175.8	33.3	33	36	37.8	38.7	36.7
A0A2I4E748	UDP-glucuronate decarboxylase OS=Juglans regia OX=51240 GN=LOC108986871 PE=3 SV=1	20	9	23	3	440	49.7	8.63	72.4	135.1	135.6	136.3	141.7	142.9	136.6	58.5	61	63	63.9	62.1	63.3
A0A2I4DDL1	AP-1 complex subunit mu-2 OS=Juglans regia OX=51240 GN=LOC108979101 PE=3 SV=1	22	10	19	3	427	48.9	6.73	52.53	84.6	88.1	86.1	77.7	79.3	79.7	124.7	128	126.3	106	109.1	110.4
A0A2I4HEM8	ras-related protein RABA2a OS=Juglans regia OX=51240 GN=LOC109016637 PE=4 SV=1	45	8	19	3	215	23.8	7.24	54.71	50.4	51.1	53.6	47.4	49.9	51.1	165.2	168	166.7	127.2	134.7	134.6
A0A833TFF2	TOG domain-containing protein OS=Juglans regia OX=51240 GN=F2P56_033517 PE=4 SV=1	14	12	20	2	1041	115.1	4.84	54.94	73.5	74	74.3	73.5	77	74.2	153.7	147.5	141	105.3	101.5	104.6
A0A833XSF8	Uncharacterized protein OS=Juglans regia OX=51240 GN=F2P56_003229 PE=4 SV=1	17	10	14	10	700	78.2	5.78	49.69	126.9	129.3	128.8	122.6	123	124.8	76.9	75	71.6	72.8	74.6	73.6
A0A2I4FQY9	mitochondrial phosphate carrier protein 3, mitochondrial-like OS=Juglans regia OX=51240 GN=LOC109001303 PE=3 SV=1	29	11	30	2	370	39.7	9.16	79.91	120.2	110.3	110.8	103.8	104.2	103.4	95	94.8	93	88.6	88.4	87.6
A0A2I4H2E2	Eukaryotic translation initiation factor 5A OS=Juglans regia OX=51240 GN=LOC109012880 PE=3 SV=1	42	7	21	5	161	17.6	5.76	65.76	114.4	116.9	122.3	111.5	111.3	113.9	86.7	83.7	81.8	91.8	83.8	81.8
A0A2I4EGM2	heat shock protein 90-5, chloroplastic OS=Juglans regia OX=51240 GN=LOC108989413 PE=3 SV=2	14	10	18	8	795	90.4	5.03	52.93	106.6	106.7	103.1	126.4	125	124	78.6	83.5	85.2	87.7	84.8	88.4
A0A2I4FG18	ras-related protein Rab11C-like OS=Juglans regia OX=51240 GN=LOC108998488 PE=4 SV=1	48	10	26	5	217	24	6.21	69.18	128.4	124.6	125.8	115.6	115.7	115.5	84.3	84.9	86.2	73.6	71.8	73.5
A0A2I4DL69	Lon protease homolog, mitochondrial OS=Juglans regia OX=51240 GN=LOC108981232 PE=3 SV=1	11	9	12	9	990	109.2	5.78	38.49	101.5	96.7	106.4	113	103.9	105.6	96.4	93.4	94	94.3	98	96.7
A0A2I4DZ41	14-3-3 protein 7-like isoform X1 OS=Juglans regia OX=51240 GN=LOC108984816 PE=3 SV=1	29	11	33	7	253	28.9	5.14	81.84	109.9	107.6	103.3	107.7	106.1	105.2	91.1	95.6	92.8	95.9	91	93.8
A0A2I4G605	Methylenetetrahydrofolate reductase OS=Juglans regia OX=51240 GN=LOC109005021 PE=3 SV=1	22	11	21	3	595	66.7	6.28	53.36	81.9	80.9	84.9	83.1	83.6	82.8	115	113.9	109.1	123.4	122.2	119.1
A0A2I4FGE4	Proteasome subunit alpha type OS=Juglans regia OX=51240 GN=LOC108998588 PE=3 SV=1	22	4	16	1	250	27.2	5.74	57.54	74.4	60	65.8	74	66.3	62.8	129.6	128	129.9	127.1	141.4	140.9
A0A2I4GTV6	nuclear valosin-containing protein-like OS=Juglans regia OX=51240 GN=LOC109010848 PE=4 SV=2	10	7	17	2	836	93.3	6.1	56	172.5	178.8	181.6	160.1	164.6	162.9	27.3	26.6	31.6	29.6	32.9	31.5
A0A6P9E072	Phosphoribosylformylglycinamidine cyclo-ligase OS=Juglans regia OX=51240 GN=LOC109000610 PE=3 SV=1	13	3	10	3	402	42.9	6.86	37.51	88.2	89.7	94.7	99.4	99.3	103.8	103.8	97.7	102.5	104.1	108.2	108.7
A0A2I4EU63	Glycerol-3-phosphate dehydrogenase OS=Juglans regia OX=51240 GN=LOC108992756 PE=3 SV=1	12	7	32	1	630	68.6	8.43	80.85	166.9	169.7	162.6	162.4	166.4	164.1	31.5	29.4	36.1	38.5	35.6	36.8
A0A2I4HNA5	Glucose-6-phosphate 1-dehydrogenase OS=Juglans regia OX=51240 GN=LOC109019736 PE=3 SV=2	24	11	28	2	516	59.2	6.81	75.05	86.6	97.3	79.8	75.1	74.4	77.8	121.3	121.3	119.9	116.6	117.2	112.5
A0A6P9EHF6	exocyst complex component SEC3A-like OS=Juglans regia OX=51240 GN=LOC108983479 PE=3 SV=1	12	11	15	3	879	99.5	6.05	46.45	111.4	116.8	111.4	112.4	106.5	105.7	95.8	91.9	96	84	83.1	85
A0A2I4FEM7	exocyst complex component SEC10b-like OS=Juglans regia OX=51240 GN=LOC108998104 PE=4 SV=1	17	13	17	4	835	91.3	5.45	55.2	98.5	98.6	99.6	103	105.5	102.8	109.9	113.5	112.1	84.4	85.6	86.4
A0A2I4EEH8	Polyadenylate-binding protein OS=Juglans regia OX=51240 GN=LOC108988866 PE=3 SV=1	13	6	14	4	647	70.9	7.3	44.97	101.3	102.9	101	108.4	111.4	103.6	91	93.6	89.9	100.2	99.1	97.6
A0A2I4G9H4	Glutamine synthetase OS=Juglans regia OX=51240 GN=LOC109005909 PE=3 SV=1	22	6	16	4	432	47.7	6.93	42.33	125.6	127.2	126.6	140.2	137	140.1	62.2	59.6	67.2	71.9	72.2	70.3
A0A2I4GU28	probable methyltransferase PMT25 OS=Juglans regia OX=51240 GN=LOC109010898 PE=3 SV=1	10	6	17	3	755	85.2	5.59	56.02	140.5	137.4	142.2	115	117	114.9	67.4	66.6	69.4	79	75.2	75.2
A0A2I4GE05	Fructose-bisphosphatase OS=Juglans regia OX=51240 GN=LOC109007069 PE=3 SV=1	19	6	15	2	339	37	6.46	55.33	174.9	172.5	182.6	162.5	161.9	165.6	23.6	29.5	34.2	31.1	31.8	29.7
A0A2I4GCK8	Transaldolase OS=Juglans regia OX=51240 GN=LOC109006717 PE=3 SV=2	16	8	25	4	439	47.5	7.74	80.37	81.6	82.2	81.8	84.7	87.2	87.2	119.1	117.6	116.1	117.3	114.4	110.6
A0A6P9EGZ5	putative 3,4-dihydroxy-2-butanone kinase OS=Juglans regia OX=51240 GN=LOC109021077 PE=4 SV=1	12	6	17	2	594	61.7	5.1	51.18	106.2	108.5	99.2	102.3	98.3	95.2	98.2	103.5	102.1	92.4	97.1	97.1
A0A2I4FTI6	Chlorophyll a-b binding protein, chloroplastic OS=Juglans regia OX=51240 GN=LOC109001908 PE=3 SV=1	32	7	11	7	291	31	5.71	39.11	24.2	26.7	25.7	31.2	30.3	29.8	164.9	164.3	162.4	176.2	184.4	180
A0A2I4H139	Aminomethyltransferase OS=Juglans regia OX=51240 GN=LOC109012601 PE=3 SV=1	21	9	24	3	408	44.3	8.98	66.83	95.9	95.8	95.2	94.9	96.4	96.2	97.9	98.3	99.4	108.8	112	109.4
A0A2I4F8R1	spliceosome-associated protein 130 A-like OS=Juglans regia OX=51240 GN=LOC108996541 PE=4 SV=2	9	10	15	2	1213	134.4	5.38	49.51	71.9	73	75.6	70.7	65	66.9	130.3	123.8	123.2	137	133.3	129.2
A0A833Y217	Inorganic diphosphatase OS=Juglans regia OX=51240 GN=F2P56_007759 PE=3 SV=1	25	6	33	3	236	26.9	5.97	88.85	129.3	138	156.8	137.2	144.6	151.7	61	62	63.8	55.2	53.6	46.7
A0A2I4EI97	Pyruvate dehydrogenase E1 component subunit alpha OS=Juglans regia OX=51240 GN=LOC108989818 PE=4 SV=1	17	9	27	5	400	44	7.94	69.58	127.1	129.9	127.5	130.3	133.4	135.1	68.2	69.9	71.2	68.9	69.1	69.3
A0A2I4FD85	Vacuolar protein sorting-associated protein 35 OS=Juglans regia OX=51240 GN=LOC108997701 PE=3 SV=1	15	10	14	10	790	89.5	5.45	48.53	93	87.9	92	87	90.5	87.9	115.8	109.8	110.2	108.1	110.1	107.6
A0A2I4EAK2	L-ascorbate oxidase homolog OS=Juglans regia OX=51240 GN=LOC108987823 PE=3 SV=2	8	4	17	4	552	61.8	9.33	66.75	193.4	184.9	192.3	162.4	160.3	155.8	23	22.9	27.6	26	24.8	26.6
A0A2I4GMB7	Proteasome subunit alpha type OS=Juglans regia OX=51240 GN=LOC109009132 PE=3 SV=1	27	7	20	7	279	30.5	5.05	56.9	72.8	74.6	74.4	69.2	71.3	70.4	126.2	129	123.5	132.1	129.4	127.2
A0A2I4DZS6	eukaryotic initiation factor 4A-3 OS=Juglans regia OX=51240 GN=LOC108984990 PE=4 SV=1	24	8	18	6	409	46.4	6.89	53.41	81.3	79	81.1	80.2	79.3	83.6	123	123.5	121	115.6	116.2	116.3
A0A2I4GE60	ras-related protein RABH1e OS=Juglans regia OX=51240 GN=LOC109007102 PE=4 SV=1	38	8	20	4	207	23.2	6.79	58.66	119.6	116.8	121.6	120.7	118.2	119.5	87.1	86.9	87.9	74.6	73.9	73.4
A0A2I4F0U9	enoyl-[acyl-carrier-protein] reductase [NADH], chloroplastic-like OS=Juglans regia OX=51240 GN=LOC108994493 PE=3 SV=1	23	7	27	5	391	41.5	7.93	73.29	68.3	70.1	70.1	70.1	73.5	73.9	132	134.8	133.1	124.4	125.2	124.5
A0A6P9E9H6	Dihydrolipoyl dehydrogenase OS=Juglans regia OX=51240 GN=LOC108994825 PE=3 SV=1	13	7	16	3	511	54.3	6.73	53.06	104.8	105.7	103.9	108.2	103.1	101.9	95.2	100.1	94	94.6	89.9	98.6
A0A6P9EWG0	DExH-box ATP-dependent RNA helicase DExH12 OS=Juglans regia OX=51240 GN=LOC109007727 PE=4 SV=1	7	12	13	11	2176	246.3	6.07	42.43	86.7	83.5	94.3	92.4	82.3	83.5	110.3	109.1	111.2	116.3	116.5	113.8
A0A2I4G8Q0	probable voltage-gated potassium channel subunit beta OS=Juglans regia OX=51240 GN=LOC109005678 PE=3 SV=1	22	9	31	2	328	36.6	6.92	77.18	47.1	45.3	45.8	46.6	49.6	48.2	167.5	169.7	161.4	141.8	140.1	136.9
A0A2I4DZE6	probable alpha,alpha-trehalose-phosphate synthase [UDP-forming] 7 OS=Juglans regia OX=51240 GN=LOC108984893 PE=3 SV=1	11	8	14	4	855	96.3	6.13	42.11	117.7	119.4	121.9	110.7	112.7	113	79.5	79.1	82.1	88.2	89.1	86.5
A0A2I4DMK4	Alkaline/neutral invertase OS=Juglans regia OX=51240 GN=LOC108981610 PE=3 SV=1	13	7	17	4	557	63.5	6.64	54.78	87.2	91.8	89.2	72.4	73.5	72.9	112.9	107.6	109.1	128.9	127.3	127.3
A0A2I4EVR7	putative 3,4-dihydroxy-2-butanone kinase OS=Juglans regia OX=51240 GN=LOC108993156 PE=4 SV=1	18	8	15	4	594	61.5	5.19	47.54	111.7	108.2	109.6	99.7	101.4	99.5	100	98.8	97.8	92.1	90	91.4
A0A2I4DQU3	Pantothenate kinase 2 OS=Juglans regia OX=51240 GN=LOC108982557 PE=3 SV=1	11	9	13	9	911	100.6	5.9	40.04	99.3	100.3	101.2	84.1	84.2	84.2	113.8	110.2	109.2	103.8	106.7	103
A0A2I4GBB4	UDP-glucuronate decarboxylase OS=Juglans regia OX=51240 GN=LOC109006382 PE=3 SV=2	29	10	20	7	441	49.6	9.04	59.43	103.8	103.5	110.1	107.3	108.5	104.8	91	94.8	93.6	94.9	91.5	96.1
A0A2I4GIE4	cytochrome P450 98A2-like OS=Juglans regia OX=51240 GN=LOC109008127 PE=3 SV=1	16	8	24	1	509	57.8	8.29	62.56	42.6	41.6	50	52.2	54.9	52.6	155.1	145.9	144.2	160.4	148.9	151.8
A0A2I4FJ54	FAM10 family protein At4g22670-like OS=Juglans regia OX=51240 GN=LOC108999267 PE=4 SV=1	17	4	15	4	396	43.1	5.07	46.47	113.8	114.5	113.6	141	128.3	126.9	77.5	78.1	82.3	72.3	73.7	78
A0A2I4ETQ0	Conserved oligomeric Golgi complex subunit 4 OS=Juglans regia OX=51240 GN=LOC108992641 PE=3 SV=1	16	11	19	11	746	83.5	5.26	49.27	109.9	110.4	109.6	114.1	115.3	112.5	95.4	95.2	94.5	79.4	82.6	81
A0A2I4H864	14-3-3-like protein GF14 iota OS=Juglans regia OX=51240 GN=LOC109014362 PE=3 SV=1	24	7	24	4	259	29.6	4.86	70.83	175.4	175.4	183.1	169.4	164.4	174.5	23.7	23.5	27.4	26.8	28.8	27.6
A0A2I4H3D0	elongation factor 1-gamma-like OS=Juglans regia OX=51240 GN=LOC109013138 PE=4 SV=1	22	8	34	2	423	48.1	6.18	84.36	78.7	77.9	78.4	74.2	74.1	75.9	127.7	128.4	122.5	121.6	117.6	123
A0A2I4EB67	auxin transport protein BIG OS=Juglans regia OX=51240 GN=LOC108988016 PE=3 SV=1	3	14	18	14	5114	567.3	6.02	49.18	87.2	88	92.6	78.6	77.3	81.8	119.9	112.1	115.2	113.8	118.3	115.2
A0A2I4FMR5	Proline--tRNA ligase OS=Juglans regia OX=51240 GN=LOC109000489 PE=3 SV=1	15	7	14	2	511	58	6.93	44.92	80.7	80.9	81.1	82.9	82.3	81.1	112.5	115.5	115.6	121.9	123.3	122.1
A0A2I4EQ83	exocyst complex component SEC3A OS=Juglans regia OX=51240 GN=LOC108991682 PE=3 SV=1	10	9	13	1	886	100	6.04	42.84	106.6	108.3	107.1	117.2	108.2	104.9	101.4	99.6	98.4	79.5	83.8	85
A0A6P9EBM4	splicing factor 3B subunit 1-like OS=Juglans regia OX=51240 GN=LOC109002782 PE=3 SV=1	15	15	15	15	1269	141.5	5.99	42.71	79.1	76.4	77.1	86.5	85	85.5	115.2	116.8	112.1	122	123.2	120.9
A0A2I4DS29	chaperone protein ClpB1 OS=Juglans regia OX=51240 GN=LOC108982926 PE=3 SV=2	11	7	10	6	910	100.8	6.24	37.59	58.9	59.5	58.3	45.8	49.5	42.5	168.2	162.1	170.6	124.6	132.4	127.6
A0A833Y1S1	Uncharacterized protein (Fragment) OS=Juglans regia OX=51240 GN=F2P56_002408 PE=3 SV=1	9	12	18	2	1530	173.1	8.24	49.99	44.2	44.8	49.7	48.3	36.4	39.3	180.8	158.5	142.9	143.9	159.3	151.9
A0A2I4G3L3	ras-related protein RABA1f OS=Juglans regia OX=51240 GN=LOC109022316 PE=4 SV=1	43	9	23	3	217	24.1	5.95	56.44	89.3	91	93.4	94.4	87.1	96.4	117.9	118	112.2	95.8	101.3	103.2
A0A2I4DKQ7	3-phosphoshikimate 1-carboxyvinyltransferase OS=Juglans regia OX=51240 GN=LOC108981100 PE=3 SV=2	11	5	13	5	522	55.7	7.39	51.26	49.4	50.6	54.6	34.3	33.6	38.6	137.4	135.3	131.5	184.5	180.3	169.8
A0A2I4F9C0	40S ribosomal protein S8 OS=Juglans regia OX=51240 GN=LOC108996677 PE=3 SV=1	32	6	17	6	220	25	10.43	56.59	154.9	153.4	150.8	111.4	114.5	116	64.8	65.6	66.8	67.3	67.7	66.9
A0A2I4EYE5	importin beta-like SAD2 isoform X1 OS=Juglans regia OX=51240 GN=LOC108993848 PE=4 SV=1	8	7	13	2	1042	120	5.05	40.06	49.3	62.9	62.2	60.6	48.8	50.7	149	140.2	162.2	139.2	130.9	144
A0A2I4H1M2	60S ribosomal protein L22-3-like OS=Juglans regia OX=51240 GN=LOC109012705 PE=3 SV=1	49	6	26	3	124	14.1	9.55	68.6	112.2	109.6	110.2	118.9	115.8	117.2	77	78.9	79.3	92.8	94.5	93.7
A0A2I4DSC5	Peptidyl-prolyl cis-trans isomerase OS=Juglans regia OX=51240 GN=LOC108983000 PE=3 SV=1	27	5	27	4	204	22.3	9.23	81.98	117.4	119.9	115.6	121.3	124.1	121.8	85.9	85.9	87.1	74.5	73.1	73.5
A0A2I4F5E9	dynamin-related protein 3A-like isoform X2 OS=Juglans regia OX=51240 GN=LOC108995716 PE=4 SV=1	13	9	13	2	829	91.5	6.76	43.39	130.7	124.8	128	136.5	134.3	129.7	78.1	78.1	61.4	63	62.5	73
A0A2I4F2B2	Fructose-bisphosphate aldolase OS=Juglans regia OX=51240 GN=LOC108994846 PE=3 SV=1	12	5	23	2	357	38.4	7.3	82.82	77.1	81.6	83	85.3	86.8	81.7	130.9	121.3	116.8	123.5	108.7	103.3
A0A2I4H292	H(+)-exporting diphosphatase OS=Juglans regia OX=51240 GN=LOC109012858 PE=3 SV=1	10	7	22	6	800	85.2	5.95	61.51	79.5	80.3	80.3	83.2	76.4	78.1	111.2	114.2	116.2	118.3	129.1	133.2
A0A7D7JTR4	Photosystem II CP47 reaction center protein OS=Engelhardia roxburghiana OX=139932 GN=psbB PE=3 SV=1	21	9	12	9	508	56	6.77	41.13	29.3	32.8	35.3	33.7	40.4	35.3	170.1	166.7	165.1	161.5	165.2	164.5
A0A2I4F1Q3	cellulose synthase-like protein D4 OS=Juglans regia OX=51240 GN=LOC108994705 PE=4 SV=1	8	7	13	5	1126	126.1	6.77	43.58	175.5	175.7	171.7	149.9	151.7	147.4	34.3	34.8	37.6	39.4	41	41
A0A6P9ECX8	UDP-D-apiose/UDP-D-xylose synthase 2-like OS=Juglans regia OX=51240 GN=LOC108985441 PE=4 SV=1	24	9	28	9	388	43.3	6.1	72.88	137.1	137.4	134.7	139.1	141.5	139.2	58.9	57.4	63.2	63.4	63	65.1
A0A2I4F357	cullin-1 OS=Juglans regia OX=51240 GN=LOC108995054 PE=3 SV=1	18	15	20	9	744	86.6	6.95	54.06	87.4	87	89.4	106.2	102.8	102.6	98	100.2	100.3	105.6	110.3	110.2
A0A2I4GTG9	Eukaryotic translation initiation factor 5A OS=Juglans regia OX=51240 GN=LOC109010735 PE=3 SV=1	54	6	17	4	160	17.4	5.99	56.58	105.1	106.9	107.5	108.2	98.5	104.8	86.2	90.6	93.7	97.3	99.6	101.5
A0A2I4FX70	Sucrose-phosphate synthase OS=Juglans regia OX=51240 GN=LOC109002797 PE=3 SV=2	11	13	20	9	1056	117.6	6.42	47.68	153.4	151.8	150.6	138	142.6	141	47.9	51.4	56.9	56.6	54.8	55.1
A0A2I4GET2	Isocitrate dehydrogenase [NADP] OS=Juglans regia OX=51240 GN=LOC109007253 PE=3 SV=1	18	10	25	5	497	55.6	8.47	65.35	86.6	90.8	86.9	76.1	90.3	83.7	112.9	122.1	113.1	115.8	113.7	107.9
A0A2I4GV50	probable calcium-binding protein CML13 OS=Juglans regia OX=51240 GN=LOC109011146 PE=4 SV=1	42	8	24	8	147	16.6	4.96	69.12	77.6	77.3	74.7	86.1	83	84.8	140	145.5	139	97.7	96.3	97.9
A0A6P9ECX3	1,3-beta-glucan synthase OS=Juglans regia OX=51240 GN=LOC109020928 PE=3 SV=1	6	10	16	8	1951	226	9.03	43.5	48.6	48.6	49.9	48.3	48.7	49.6	137	131.3	133.7	163.8	169.8	170.7
A0A2I4E0S4	actin-interacting protein 1-2-like OS=Juglans regia OX=51240 GN=LOC108985245 PE=4 SV=1	12	6	16	6	610	66	6.87	51.63	110.5	118.3	120.2	100.3	97.9	99.9	94.3	92.4	93.6	89.1	92.1	91.5
A0A2I4G6D8	villin-4-like OS=Juglans regia OX=51240 GN=LOC109005119 PE=3 SV=1	9	7	22	1	960	107.2	6.13	60.52	87.4	110.4	100.3	83.2	122.2	110.5	97.9	108.9	79.4	94.9	114.4	90.5
A0A833TZE8	Ribosomal_L7Ae domain-containing protein OS=Juglans regia OX=51240 GN=F2P56_032835 PE=3 SV=1	26	3	24	1	107	11.9	9.25	74.12	79	80.2	81.4	94.6	93.3	98.8	78.5	77	81.1	139.1	145.3	151.7
A0A2I4ERQ2	Uridine kinase OS=Juglans regia OX=51240 GN=LOC108992088 PE=3 SV=1	24	9	15	5	485	54.2	6.54	50.32	119.5	115.2	122.8	117.8	111.5	111.9	86.7	82.4	83.6	82.3	82.7	83.5
A0A2I4ES45	DEAD-box ATP-dependent RNA helicase 15 OS=Juglans regia OX=51240 GN=LOC108992202 PE=4 SV=1	32	12	19	3	427	48.2	5.81	49.73	88.9	90.5	89.5	94.7	94.8	90.3	101.1	104.8	104.5	110	115.2	115.6
A0A6P9F3L6	Arginine--tRNA ligase OS=Juglans regia OX=51240 GN=LOC109002835 PE=3 SV=1	14	8	12	8	589	66.5	5.92	35.41	105.5	105.7	108.1	109.7	110.7	110.9	87.3	81.8	90.9	94.8	95.9	98.7
A0A2I4H8L5	GMP synthase (glutamine-hydrolyzing) OS=Juglans regia OX=51240 GN=LOC109014469 PE=3 SV=1	19	7	13	7	538	59.6	6.74	43.81	124.1	120.7	122.6	118	115	115	74	72.2	79.2	82.8	87.8	88.8
A0A6P9EYF8	Inositol hexakisphosphate and diphosphoinositol-pentakisphosphate kinase OS=Juglans regia OX=51240 GN=LOC108992859 PE=3 SV=1	13	10	12	2	1053	119.8	6.43	39.75	149.3	150.6	142.4	133.2	134.6	129.9	57.8	54	59.6	63	61.2	64.4
A0A2I4H138	Dihydrolipoyllysine-residue succinyltransferase OS=Juglans regia OX=51240 GN=LOC109012598 PE=3 SV=1	12	5	18	1	479	52	9.16	61.05	104.7	103.2	104.2	119.6	121.1	116.3	89.1	102.3	92.5	79.2	85	82.8
A0A2I4EVK7	protein argonaute 1-like OS=Juglans regia OX=51240 GN=LOC108993130 PE=3 SV=1	12	10	13	1	1064	117.4	9.38	42.9	47.5	33.6	44.6	50.8	42.5	48.6	169.2	168.4	153.6	146.7	146.7	147.8
A0A2I4EXX7	50S ribosomal subunit assembly factor BipA OS=Juglans regia OX=51240 GN=LOC108993713 PE=4 SV=1	16	7	10	7	677	73.6	7.15	33.83	133.1	139	134.7	134.8	137.8	132.5	67.8	65.4	68	63.8	60.8	62.3
A0A2I4GTL3	galactokinase OS=Juglans regia OX=51240 GN=LOC109010775 PE=3 SV=1	18	7	19	3	500	54.6	6.05	58.67	142.9	144.1	144.5	139.6	139.7	142.9	51.6	49.9	56.7	60.8	62.8	64.3
A0A2I4FUA1	26S proteasome non-ATPase regulatory subunit 8 homolog A-like OS=Juglans regia OX=51240 GN=LOC109002083 PE=3 SV=1	25	5	12	5	267	30.9	5.01	49.12	91	89.5	92.9	104.9	98.4	100.9	95.8	92.5	101	110.9	110.7	111.4
A0A2I4GNS5	Eukaryotic translation initiation factor 3 subunit L OS=Juglans regia OX=51240 GN=LOC109009510 PE=3 SV=1	17	9	23	9	523	61.2	6.07	63.47	97.2	96.3	94	99.4	97.4	95.6	100.3	100.4	100.5	104.1	107.2	107.5
A0A6P9EAX3	monodehydroascorbate reductase, seedling isozyme-like OS=Juglans regia OX=51240 GN=LOC109005339 PE=4 SV=1	14	6	26	3	434	47.4	6.58	60.82	125.9	124.5	121.3	102.7	106.1	103.1	83.1	87.5	87.2	85.4	87.1	86.2
A0A2I4FP09	NADP-dependent glyceraldehyde-3-phosphate dehydrogenase-like OS=Juglans regia OX=51240 GN=LOC109000833 PE=3 SV=1	23	9	13	2	496	53.2	7.52	39.89	19.2	24.4	23.3	23.4	28	34.2	173.1	168.5	157.1	180.8	183.9	184.2
A0A6P9ESZ6	ras-related protein RABC1-like OS=Juglans regia OX=51240 GN=LOC109002181 PE=4 SV=1	38	7	17	3	213	23.7	7.62	51.68	126.4	121.9	128.1	124.5	118.1	123.1	76.1	79.1	79.3	70.3	75.2	77.9
A0A833SWX2	Uncharacterized protein OS=Juglans regia OX=51240 GN=F2P56_029315 PE=3 SV=1	29	8	19	8	279	31.8	6.55	52.69	88.3	86.4	87.1	112.2	110.1	107.8	100.7	101.7	103.4	98.7	102.4	101.3
A0A2I4FQY1	Glutamine--fructose-6-phosphate transaminase (isomerizing) OS=Juglans regia OX=51240 GN=LOC109001291 PE=4 SV=1	18	11	18	11	691	76	6.54	49.29	162.9	161.1	167.3	148.8	148.8	153.1	38.3	39.1	45.8	45.2	44.9	44.6
A0A7M1CHZ7	Photosystem II CP43 reaction center protein OS=Engelhardia fenzelii OX=210133 GN=psbC PE=3 SV=1	18	7	11	7	473	51.8	7.18	38.04	33.8	34.3	37.5	34.9	35.3	37.6	172.5	170.3	165.4	159.5	161.9	157.1
A0A833UI10	Uncharacterized protein OS=Juglans regia OX=51240 GN=F2P56_021469 PE=4 SV=1	10	10	17	3	1165	129.4	5.81	51.12	86.9	89.3	86.5	78.3	77.3	81.5	136	134.3	132	98.8	98.2	101.1
A0A2I4F6F5	Methyltransferase OS=Juglans regia OX=51240 GN=LOC108995978 PE=3 SV=1	16	10	21	6	615	70.4	6.23	62.21	153.8	151.5	155.1	142.1	142.1	141.6	52.3	49.3	56.1	50.2	54.5	51.4
A0A833XE11	Uncharacterized protein (Fragment) OS=Juglans regia OX=51240 GN=F2P56_014795 PE=3 SV=1	14	8	21	8	625	66.8	8.28	64.47	103.6	103.7	99.8	95.2	98.2	98.8	96.8	97	96.1	106	101.3	103.6
A0A2I4FZZ1	Mitogen-activated protein kinase OS=Juglans regia OX=51240 GN=LOC109003519 PE=3 SV=1	27	9	16	5	372	42.9	6.42	46.42	59.4	62.8	65.1	64.2	63.1	64.5	155.7	151.6	143.9	125.3	120.3	123.8
A0A2I4EV94	40S ribosomal protein S15a-1-like OS=Juglans regia OX=51240 GN=LOC108993009 PE=3 SV=1	56	7	25	7	130	14.7	9.82	90.67	111.5	112.6	113.4	97.7	102.4	99.9	95.9	93.9	90.8	100	90.8	91.1
A0A2I4G958	Cysteine synthase OS=Juglans regia OX=51240 GN=LOC109005833 PE=3 SV=1	21	7	17	6	395	42	8.37	47.53	75.4	78.5	74.9	78	76.8	80.8	124.3	120.8	117.2	124.4	125.7	123.1
A0A2I4EWM6	translocase of chloroplast 120, chloroplastic-like OS=Juglans regia OX=51240 GN=LOC108993368 PE=3 SV=1	9	8	12	4	1194	129.2	4.89	34.76	110.4	106.9	106.8	116.6	117.5	115	83	86	86.3	87.9	92	91.6
A0A2I4H0Y9	Alpha-1,4 glucan phosphorylase OS=Juglans regia OX=51240 GN=LOC109012557 PE=3 SV=1	8	6	12	2	844	95.8	7.37	39.47	90.7	93.4	94	85.6	91	91	98.3	97.8	100.1	119.3	119.5	119.1
A0A834D1S1	Uncharacterized protein (Fragment) OS=Juglans regia OX=51240 GN=F2P56_009792 PE=3 SV=1	16	8	23	1	533	60.4	8.21	60.82	8.3	6.6	6.5	8.4	10.2	6.1	188.7	202	203	199.5	194.2	166.5
A0A2I4H7A1	Phosphoserine aminotransferase OS=Juglans regia OX=51240 GN=LOC109014128 PE=3 SV=1	13	5	20	5	423	46.8	8.72	54.93	102.8	107.8	105.2	111.3	112.8	107.3	87.1	90.2	88.2	96.8	94.7	95.6
A0A2I4E6Y7	peroxisomal fatty acid beta-oxidation multifunctional protein AIM1 OS=Juglans regia OX=51240 GN=LOC108986842 PE=3 SV=1	8	6	11	2	754	81.8	9.35	40.47	99.4	99	97.6	103.1	104.9	100.2	98.8	97.5	97.4	104.5	99.7	97.9
A0A2I4HM92	villin-3-like isoform X1 OS=Juglans regia OX=51240 GN=LOC109019451 PE=4 SV=2	12	9	15	3	978	107.1	5.54	41.21	68.8	69.4	70.1	57.6	58.6	61.7	152	153.8	147.7	122.2	119.2	118.8
A0A6P9DWQ1	Coatomer subunit delta OS=Juglans regia OX=51240 GN=LOC109006976 PE=3 SV=1	13	7	22	1	530	58.1	5.52	51.87	102	102.4	100.5	106.6	108.7	109.4	101.2	99.4	98.3	91.3	89.4	90.8
A0A2I4DX48	Elongation factor Tu OS=Juglans regia OX=51240 GN=LOC108984280 PE=3 SV=1	21	8	19	7	489	52.9	6.67	53.4	63.1	65.2	69.8	61.7	61.8	63.9	133.2	138.4	141.3	132.9	136.3	132.3
A0A2I4GD60	translationally-controlled tumor protein homolog OS=Juglans regia OX=51240 GN=LOC109006848 PE=3 SV=1	29	6	18	3	168	19.1	4.56	53.42	86.5	82.3	86.5	100.2	107.4	108.4	103.2	104.8	106.4	101.4	105.3	107.6
A0A2I4G8Y8	Ketol-acid reductoisomerase OS=Juglans regia OX=51240 GN=LOC109005769 PE=3 SV=1	9	4	19	1	590	63.8	7.21	70.94	94.8	92.4	116.6	103.8	88.4	97	105.2	103.6	98	87.7	97.4	115.1
A0A2I4ED70	Dihydroorotate dehydrogenase (quinone), mitochondrial OS=Juglans regia OX=51240 GN=LOC108988520 PE=3 SV=1	11	4	14	4	455	48.4	9.22	51.69	123.4	123.2	122	116.3	115.7	118	76.7	77	81.2	80.9	83.1	82.5
A0A833XMZ7	Dihydrolipoamide acetyltransferase component of pyruvate dehydrogenase complex OS=Juglans regia OX=51240 GN=F2P56_012690 PE=3 SV=1	9	4	22	2	514	53.7	9.04	65.57	93.3	89.1	86.2	81.6	98.1	80	109.7	103.7	111.5	111.8	119.8	115.2
A0A2I4EDN4	Transmembrane 9 superfamily member OS=Juglans regia OX=51240 GN=LOC108988648 PE=3 SV=1	9	4	17	3	640	73.6	8.59	45.72	85.6	84.7	89	78.9	78.1	86.7	126.6	119.8	122.5	106.7	111.1	110.3
A0A2I4EQI2	gamma carbonic anhydrase 1, mitochondrial-like OS=Juglans regia OX=51240 GN=LOC108991729 PE=4 SV=1	25	6	23	2	273	29.7	6.32	62.48	97.9	98.6	99.5	108.9	108.5	110	97.2	93.3	92.7	98.3	97	98.2
A0A6P9EH28	Protein ROOT HAIR DEFECTIVE 3 homolog OS=Juglans regia OX=51240 GN=LOC108988646 PE=3 SV=1	12	10	16	2	811	89.8	5.94	48.03	89.1	92.6	94.9	94	91.5	86.8	102.9	98	109.5	115.6	107	118.1
A0A834D096	Glutamate-1-semialdehyde 2,1-aminomutase (Fragment) OS=Juglans regia OX=51240 GN=F2P56_003261 PE=3 SV=1	16	5	9	5	501	53.9	7.44	29.68	81.5	84.2	83.7	83.6	87	87.2	114.5	109.3	106.3	117.7	123.5	121.6
A0A2I4FTV4	developmentally-regulated G-protein 2 OS=Juglans regia OX=51240 GN=LOC109001992 PE=4 SV=1	28	10	16	10	399	44.5	8.76	47.93	100.5	102.2	97.4	111	109.3	113.7	92.9	91.8	94.3	93.4	97.2	96.4
A0A2I4GET7	Eukaryotic translation initiation factor 3 subunit C OS=Juglans regia OX=51240 GN=LOC109007258 PE=3 SV=1	13	9	17	9	944	106.6	5.3	49.52	120.5	121.4	119.2	128.9	119.6	119.1	76.4	74.2	73.9	81.2	81.8	83.8
A0A2I4E887	ubiquitin-NEDD8-like protein RUB2 OS=Juglans regia OX=51240 GN=LOC108987188 PE=4 SV=1	53	8	97	2	154	17.1	6.06	197.25	71	78.3	70.2	126.9	118	122.3	99.9	106.2	100.3	99.4	106.2	101.3
A0A2I4F3S5	ferredoxin-dependent glutamate synthase, chloroplastic-like OS=Juglans regia OX=51240 GN=LOC108995228 PE=3 SV=2	6	7	12	7	1637	178.4	6.89	37.23	67.3	69.3	68.7	62.6	62.6	61.1	131.3	130.6	127.8	134.9	144.9	138.7
A0A2I4E563	actin-depolymerizing factor 2-like OS=Juglans regia OX=51240 GN=LOC108986377 PE=3 SV=1	32	3	20	1	139	16	5.71	47.99	28.9	27.9	27.6	40.2	39.8	37.5	189.5	189	189.6	141.6	140	148.3
A0A2I4ETV4	dnaJ homolog subfamily C GRV2 isoform X1 OS=Juglans regia OX=51240 GN=LOC108992669 PE=4 SV=1	7	16	18	16	2596	283.5	6.13	42.42	86.7	85.2	92.4	88.1	89.4	87.6	118.7	118	119.4	107.4	101	106
A0A2I4E7Y3	AP-1 complex subunit gamma OS=Juglans regia OX=51240 GN=LOC108987110 PE=3 SV=1	13	8	15	8	879	96.3	6.33	43.27	86.7	84.6	86.4	81.9	84.6	81.4	124.4	117.5	123.1	106.8	111.6	111
A0A2I4E5F6	dynamin-related protein 1C-like OS=Juglans regia OX=51240 GN=LOC108986464 PE=3 SV=1	21	12	20	1	610	68.2	7.61	52.93	94.4	95.1	96	96.7	98.7	97.8	110	107.3	106.1	100.2	102.2	95.5
A0A2I4G559	ras-related protein RABC1-like isoform X1 OS=Juglans regia OX=51240 GN=LOC109004803 PE=4 SV=1	27	5	13	1	209	23.4	6.99	42.64	119.5	118.1	112.6	112	107.5	109.2	84	88.5	87.2	84.5	89.4	87.6
A0A6P9E888	actin-depolymerizing factor 2-like OS=Juglans regia OX=51240 GN=LOC108999532 PE=3 SV=1	32	3	18	1	139	16	5.71	40.72	52.4	48.8	57.8	57.1	57.2	54.6	149	159.7	157	126.7	134.6	145
A0A2I4GZQ2	nascent polypeptide-associated complex subunit alpha-like protein 1 OS=Juglans regia OX=51240 GN=LOC109012282 PE=4 SV=1	28	4	16	1	203	22.2	4.53	44.96	120.8	119.8	125.9	149.6	147.6	148.9	61.1	57.9	61.5	68.4	70	68.4
A0A834D2Y8	14_3_3 domain-containing protein (Fragment) OS=Juglans regia OX=51240 GN=F2P56_009623 PE=3 SV=1	15	7	33	2	307	35	5.35	76.16	88.6	86.9	83	79.9	83.4	82.3	124.6	122.9	119.8	109.9	107.7	111
A0A833T8F0	NADH dehydrogenase [ubiquinone] iron-sulfur protein 3 OS=Juglans regia OX=51240 GN=F2P56_037260 PE=3 SV=1	33	5	19	5	190	22.6	7.44	52.66	86.3	90.4	85.9	106.5	104.5	104.5	106.8	105.1	106.7	101.3	101.7	100.5
A0A6P9EFD1	Protein disulfide-isomerase OS=Juglans regia OX=51240 GN=LOC109009065 PE=3 SV=1	12	7	20	4	569	63.5	4.64	63.04	117.1	119.2	118	110.7	113.3	112.3	80	83.2	84.6	86.5	86.3	89.1
A0A2I4E257	AP-1 complex subunit mu-2-like OS=Juglans regia OX=51240 GN=LOC108985585 PE=3 SV=1	17	8	17	1	427	49	6.73	47.24	87.5	89.7	80.7	72.7	80	76.8	125.7	135.1	135.5	102.3	107	106.9
A0A2I4G950	60S ribosomal protein L5-like OS=Juglans regia OX=51240 GN=LOC109005829 PE=3 SV=1	27	7	21	7	299	34.4	9.09	53.72	141.9	142.7	145.7	142.1	134.9	140.4	52.3	53.1	56.9	60.3	62.8	66.9
A0A2I4EG86	probable voltage-gated potassium channel subunit beta OS=Juglans regia OX=51240 GN=LOC108989313 PE=3 SV=1	19	8	29	1	328	36.6	6.92	74.09	82.7	87.9	88.5	77.1	62.4	66.5	108.9	117.3	109.6	147.3	123.8	127.9
A0A2I4F566	Sucrose-phosphate synthase OS=Juglans regia OX=51240 GN=LOC108995651 PE=3 SV=1	11	9	15	5	1055	117.9	6.47	37.3	150	146.7	145.5	139.5	136.9	136.3	60.4	56.2	60.3	54.2	57	57
A0A2I4H6R6	protein STRICTOSIDINE SYNTHASE-LIKE 3-like OS=Juglans regia OX=51240 GN=LOC109014003 PE=3 SV=1	18	5	11	1	392	44	7.34	40.17	41.7	51	40.9	38.6	46	48.4	169.5	152.3	161.5	145.8	145	159.4
A0A2I4DMP7	probable glycerol-3-phosphate acyltransferase 8 OS=Juglans regia OX=51240 GN=LOC108981658 PE=4 SV=2	19	11	20	11	500	55.3	9.36	50.26	24.1	24.8	26	28.3	29.5	29.9	264.7	269.6	249.7	81.8	85.7	85.9
A0A2I4F281	galactokinase-like isoform X1 OS=Juglans regia OX=51240 GN=LOC108994829 PE=3 SV=2	15	5	15	1	499	54.7	6.38	50.52	132.4	140.1	139	168.9	161.7	156.1	41.2	36.3	44.9	57.4	58.1	63.9
A0A2I4GNJ0	ATP-dependent 6-phosphofructokinase OS=Juglans regia OX=51240 GN=LOC109009465 PE=3 SV=1	15	6	16	3	490	54.1	7.14	49.41	102.4	97.8	98.9	92.7	93.9	90.4	94.9	98.2	100.5	107.8	108.6	113.9
A0A2I4ET41	probable fructokinase-4 OS=Juglans regia OX=51240 GN=LOC108992456 PE=3 SV=1	20	6	25	1	332	35.5	5.35	74.49	110.4	113.1	118.5	110.5	104.4	116.4	86.6	94.1	86.2	82.6	87.2	89.9
A0A2I4GQX0	ras-related protein RABA1c OS=Juglans regia OX=51240 GN=LOC109010042 PE=4 SV=1	42	9	23	3	218	24.2	5.95	57.24	83.8	82.3	82.4	81.6	81.8	83.1	128.7	126.1	125.1	108.6	107.4	109.1
A0A2I4HNA1	Adenylate kinase OS=Juglans regia OX=51240 GN=LOC109019734 PE=3 SV=1	22	6	12	4	245	26.8	8.05	31.55	99.1	105.2	97.9	109.6	111.8	110	93.8	92.9	96.4	93.3	94.2	95.8
A0A6P9ES92	AP-1 complex subunit mu-2-like OS=Juglans regia OX=51240 GN=LOC109015343 PE=3 SV=1	18	8	17	1	428	49.1	6.04	47.59	27.6	28.5	27.8	27	28.6	29.4	233.7	243.3	246.2	94.6	106.3	107.1
A0A2I4FBS4	Transaldolase OS=Juglans regia OX=51240 GN=LOC108997328 PE=3 SV=1	16	7	22	3	438	47.4	7.31	72.69	86.3	86	81	79.2	85.6	85.7	117.8	119.9	120.2	116.6	111.4	110.4
A0A2I4G936	protein transport protein Sec61 subunit alpha-like OS=Juglans regia OX=51240 GN=LOC109005819 PE=3 SV=1	17	9	35	1	476	52.2	8.91	78.22	127.1	121.4	119.6	118.7	124	116.2	80.3	76.8	78.5	79.1	79.5	78.7
A0A2I4E4L6	Glycerol-3-phosphate dehydrogenase [NAD(+)] OS=Juglans regia OX=51240 GN=LOC108986233 PE=3 SV=1	21	6	11	6	390	42.6	5.39	38.36	192.3	190.5	190.9	166.4	169	165.9	16.4	16.7	21.6	23.3	23.4	23.6
A0A833U4G9	Proteasome subunit beta OS=Juglans regia OX=51240 GN=F2P56_027759 PE=3 SV=1	26	6	15	6	257	28.5	8.06	51.34	68.7	69.9	66	71.4	73.1	70	128	126.6	123.9	136.5	131.5	134.6
A0A2I4H383	urease accessory protein G OS=Juglans regia OX=51240 GN=LOC109013086 PE=3 SV=1	24	5	9	5	287	31.4	6.42	30.8	92.6	93.9	95.1	116.2	112.3	113.4	104.5	101.6	103.6	89.7	87	90.1
A0A2I4FTI0	eukaryotic peptide chain release factor subunit 1-3-like OS=Juglans regia OX=51240 GN=LOC109001905 PE=3 SV=1	20	8	20	4	436	49	5.6	46.4	93	93.4	93.3	95.9	94.8	91.3	105	106.2	107.6	106.7	104.4	108.4
A0A2I4GME8	N-terminal acetyltransferase A complex auxiliary subunit NAA15-like OS=Juglans regia OX=51240 GN=LOC109009151 PE=4 SV=1	12	10	12	2	901	103.1	7.69	34.76	107.3	118.1	117	112.1	103.7	119.9	75.5	82.3	77.4	91.3	98.1	97.2
A0A2I4FHN6	ATP-dependent 6-phosphofructokinase OS=Juglans regia OX=51240 GN=LOC108998886 PE=3 SV=1	12	5	13	3	521	57.6	6.9	46.07	83.1	91.7	92	96.1	92.6	92	103.7	105.5	104.4	109.2	111.7	117.9
A0A2I4FSI7	Formate--tetrahydrofolate ligase OS=Juglans regia OX=51240 GN=LOC109001687 PE=3 SV=1	10	6	10	6	636	67.8	7.33	38.02	111.5	109.8	113.1	111.9	101.7	104.9	89.2	87.1	93.8	87.1	96.7	93.3
A0A2I4G9V1	Transmembrane 9 superfamily member OS=Juglans regia OX=51240 GN=LOC109005979 PE=3 SV=1	7	5	10	2	657	74.2	6.96	33.25	119.7	115.2	109.9	100.1	109.1	104	95	96.9	93.2	82.3	88.7	86
A0A6P9DW83	DEAD-box ATP-dependent RNA helicase 15-like OS=Juglans regia OX=51240 GN=LOC109013901 PE=4 SV=1	26	10	17	1	427	48.2	5.72	45.11	94.5	94.5	111.5	104.6	99.9	84.5	95.9	79.1	102.8	128.2	95.5	108.8
A0A6P9DU78	Delta-1-pyrroline-5-carboxylate synthase OS=Juglans regia OX=51240 GN=LOC108982231 PE=3 SV=1	12	8	18	5	753	81.8	7.09	46.51	134.3	132.4	133.6	132.8	132.9	127.1	59.2	59.8	62.3	73.1	76.2	76.4
A0A2I4G329	1,3-beta-glucan synthase OS=Juglans regia OX=51240 GN=LOC109004236 PE=3 SV=2	7	10	17	6	1764	205.8	9.07	39.6	69.3	66.6	74.2	66.8	66	66.9	139.8	125.9	136.3	133.1	123.9	131.2
A0A2I4GLK4	Inositol hexakisphosphate and diphosphoinositol-pentakisphosphate kinase OS=Juglans regia OX=51240 GN=LOC109008927 PE=3 SV=1	11	9	11	1	1029	117.3	6.44	34.67	145	125	140.8	126.7	121.8	116.5	60.9	71.3	73.9	71.9	67.5	78.5
A0A2I4F862	ras-related protein RABC1 isoform X1 OS=Juglans regia OX=51240 GN=LOC108996407 PE=4 SV=1	27	5	15	2	209	23.3	6.65	43.28	104.3	107.6	106.4	93.6	94.2	92.3	107.3	108	106.4	91	96.2	92.7
A0A2I4GQY2	BEACH domain-containing protein C2 isoform X2 OS=Juglans regia OX=51240 GN=LOC109010050 PE=4 SV=2	5	12	15	12	2981	325.3	5.69	39.17	132.4	129.5	130.4	118.1	116.8	118	83.9	81.6	85.6	65.8	70.3	67.6
A0A834D2J8	Glutaredoxin-dependent peroxiredoxin OS=Juglans regia OX=51240 GN=F2P56_005741 PE=3 SV=1	19	4	17	4	283	30.6	9.04	48.69	124.4	120.4	122.3	184.1	185.2	186.1	43.8	45	50.5	46.8	45.8	45.5
A0A2I4EZN6	ATP synthase subunit gamma OS=Juglans regia OX=51240 GN=LOC108994195 PE=3 SV=1	21	6	15	1	322	35	9.13	51.35	160	164.6	164.5	170	165.6	165.6	28.9	26.9	33.6	42.3	37.2	40.7
A0A2I4GXS0	HECT-type E3 ubiquitin transferase OS=Juglans regia OX=51240 GN=LOC109011819 PE=4 SV=2	3	11	14	1	3657	402.7	5.21	42.5	65.3	84.6	83	79.8	74.5	70.2	118.7	109.7	142.4	118.4	126.5	127.1
A0A2I4HPZ7	Methylenetetrahydrofolate reductase OS=Juglans regia OX=51240 GN=LOC109020262 PE=3 SV=1	19	9	20	1	596	66.6	6.92	46.67	164.9	170	167.9	127.1	132.9	128.1	50.4	57.4	56.7	49.9	48.6	46.2
A0A2I4EQR6	26S proteasome non-ATPase regulatory subunit 7 homolog A OS=Juglans regia OX=51240 GN=LOC108991816 PE=3 SV=1	14	5	9	5	310	34.8	6.4	35.25	89.1	89.5	83.1	91.4	90.1	94.5	113.6	113.2	108.1	107.6	111	108.9
A0A2I4GIF1	nascent polypeptide-associated complex subunit alpha-like protein 1 OS=Juglans regia OX=51240 GN=LOC109008138 PE=4 SV=1	29	4	15	1	200	21.8	4.54	36.76	78.3	84	84.2	71.6	88	109.3	110.6	123.2	116.3	102.5	119.8	112.3
A0A2I4F6J2	Glutathione reductase OS=Juglans regia OX=51240 GN=LOC108996011 PE=3 SV=1	19	9	13	9	575	62.4	7.8	38	82.2	87.1	88.5	88.2	84.1	84.5	114.8	112	109.3	115.4	115.4	118.6
A0A2I4HRY0	Lactoylglutathione lyase OS=Juglans regia OX=51240 GN=LOC109020833 PE=3 SV=1	18	4	20	1	291	32.7	5.62	70.81	47.5	45.9	48	48.5	44.2	40.3	142	145.6	154.3	152.4	165.8	165.6
A0A2I4G8Y0	Ribose-phosphate diphosphokinase OS=Juglans regia OX=51240 GN=LOC109005754 PE=3 SV=1	19	7	11	2	411	44.5	6.64	35.22	112.7	113	115.8	124	119.7	121.2	75.8	74.6	80.4	85.8	90.4	86.5
A0A6P9ECA0	[Acyl-carrier-protein] S-malonyltransferase OS=Juglans regia OX=51240 GN=LOC118348401 PE=4 SV=1	12	5	11	2	421	44.6	8.35	39.28	105	105	104.2	101.6	104.1	104.7	92	91.6	93.2	99.3	100.1	99.2
A0A834D084	Coatomer subunit delta OS=Juglans regia OX=51240 GN=F2P56_009576 PE=3 SV=1	13	7	23	1	508	55.9	5.5	51.26	112.4	113.2	115.8	99.4	106.2	106.5	105.3	100.4	99.4	82.3	77.6	81.3
A0A2I4G155	transcription factor Pur-alpha 1 OS=Juglans regia OX=51240 GN=LOC109003780 PE=3 SV=1	34	12	16	12	290	32	5.71	42.25	83.7	87.4	82.8	87.6	86.5	85.9	116.8	118.8	120.9	107.3	111.2	111.3
A0A2I4DKZ5	ras-related protein Rab7 OS=Juglans regia OX=51240 GN=LOC108981172 PE=4 SV=2	38	7	14	4	205	23	5.48	45.6	102.3	99.3	98.4	93.6	97	99.4	108.2	110.4	107	92.7	95.2	96.4
A0A2I4DYE4	Mitogen-activated protein kinase OS=Juglans regia OX=51240 GN=LOC108984609 PE=3 SV=1	23	7	20	3	400	45.6	5.73	54.03	88.3	93.8	94	96.4	96.7	93.3	117.6	115.7	115.5	94.8	100.3	93.8
A0A2I4EZA1	Serine/threonine-protein phosphatase OS=Juglans regia OX=51240 GN=LOC108994090 PE=3 SV=1	26	7	10	5	305	34.8	5.44	28.72	75.3	80.2	83.2	72.1	70.5	74.2	120.1	121.6	113.6	123.3	135.7	130.1
A0A833X5P6	Phospho-2-dehydro-3-deoxyheptonate aldolase (Fragment) OS=Juglans regia OX=51240 GN=F2P56_020124 PE=3 SV=1	10	5	17	2	529	58.6	8	48.78	98.4	101.1	95.2	102.9	114.6	107.5	95.3	95.1	88.7	96.3	104.9	100.1
A0A2I4GAS8	NADH-cytochrome b5 reductase OS=Juglans regia OX=51240 GN=LOC109006259 PE=3 SV=1	19	6	12	6	328	36.2	9.06	38.79	108.5	103.2	112	118.8	124.1	120.6	91.2	82	92.6	81.4	84.8	80.8
A0A2I4GHB5	ATP-dependent 6-phosphofructokinase OS=Juglans regia OX=51240 GN=LOC109007871 PE=3 SV=1	10	6	14	1	576	63.3	7.44	43.21	127.2	123.3	128.7	116.6	114.5	116.7	75.1	76.5	75.1	84.6	79.9	81.9
A0A2I4G9E5	DUF21 domain-containing protein At4g14240-like OS=Juglans regia OX=51240 GN=LOC109005895 PE=4 SV=1	14	5	10	3	486	53	5.74	33.11	147.2	136.3	138.4	152.7	144.1	140.5	53.7	55.4	60.2	56.3	55.9	59.5
A0A6P9EM32	Phosphoglucomutase (alpha-D-glucose-1,6-bisphosphate-dependent) OS=Juglans regia OX=51240 GN=LOC108998598 PE=3 SV=1	14	8	14	8	639	69.2	6.7	39.2	54.5	53.3	51.2	56.9	57.9	57.2	144.2	144.6	143.5	141.7	149	146
A0A2I4HQF3	V-type proton ATPase subunit E-like OS=Juglans regia OX=51240 GN=LOC109020393 PE=3 SV=1	37	9	25	9	230	26.4	6.44	66.4	90.4	88.4	87.2	92.1	94.6	94.1	120.5	119.7	115.4	98.8	99.9	98.9
A0A2I4G2R1	Mitogen-activated protein kinase OS=Juglans regia OX=51240 GN=LOC109004185 PE=3 SV=1	17	5	11	1	379	43.1	6.98	33.4	33.1	32.1	39.2	38.7	40.4	36.4	191.5	174.5	172.6	150.5	151.2	139.9
A0A2I4EZN2	ATP synthase subunit gamma, mitochondrial-like OS=Juglans regia OX=51240 GN=LOC108994194 PE=3 SV=2	19	7	15	2	322	34.9	9.23	50.71	131.5	131.5	130.8	133.9	132.7	126.8	58.9	54.7	60.7	84	75.2	79.3
A0A2I4EHX3	Amine oxidase OS=Juglans regia OX=51240 GN=LOC108989738 PE=3 SV=1	12	7	14	3	781	87.2	7.23	40.12	92.1	92.3	90.5	96	92.1	90.9	98	95.8	96.6	121.4	114.9	119.4
A0A2I4H8Z7	ras-related protein Rab11A OS=Juglans regia OX=51240 GN=LOC109014562 PE=4 SV=1	30	7	16	4	228	25	7.37	46.84	36.3	33.4	34.6	34.5	36.1	35.7	181.6	187.2	178.1	145.2	149.1	148.2
A0A2I4H0X5	60S ribosomal protein L30-like OS=Juglans regia OX=51240 GN=LOC109012540 PE=3 SV=1	21	4	26	2	112	12.6	9.44	74.9	108.1	106.1	107.8	98.4	98.9	102.5	76.3	78.5	76.9	114.2	116.7	115.5
A0A2I4GVI3	Phosphoglycerate kinase OS=Juglans regia OX=51240 GN=LOC109011248 PE=3 SV=1	15	6	20	3	401	42.5	5.83	57.41	102.5	96.6	97.6	111.1	107.5	108.3	89.5	88.8	94.1	97.4	102.1	104.4
A0A2I4GC23	translocase of chloroplast 120, chloroplastic-like OS=Juglans regia OX=51240 GN=LOC109006579 PE=3 SV=1	9	7	10	3	1174	128.4	5.02	29.1	96.6	100.7	97.9	98	101.9	106.2	99.1	98.3	96	95.4	102.9	107.2
A0A2I4GWA8	serine decarboxylase OS=Juglans regia OX=51240 GN=LOC109011426 PE=3 SV=1	18	6	8	5	469	52.3	6.34	26.13	166.1	164.1	163	179.3	173.4	172.4	20.7	24.2	31.7	36	33.6	35.7
A0A6P9EEQ1	Succinate-semialdehyde dehydrogenase OS=Juglans regia OX=51240 GN=LOC108983566 PE=3 SV=1	14	8	15	8	572	61.4	8.27	41.43	81.6	81.7	86.5	85	87.7	87.5	118.5	119	115.3	110.6	114.4	112.1
A0A2I4G242	Methyltransferase OS=Juglans regia OX=51240 GN=LOC109004019 PE=3 SV=1	14	8	16	3	600	68.7	8.66	49.09	141.3	143.8	147	147.1	145.2	140.5	53.7	53.5	61.6	52	57.8	56.5
A0A2I4GGY8	Proline--tRNA ligase OS=Juglans regia OX=51240 GN=LOC109007779 PE=3 SV=1	14	6	12	1	511	57.8	6.58	38.11	77.5	88.7	89.5	51.7	72.5	70.9	164.8	149.6	119.6	130.7	94.9	89.6
A0A6P9EBK4	Serine/threonine-protein phosphatase 2A 55 kDa regulatory subunit B OS=Juglans regia OX=51240 GN=LOC109008856 PE=3 SV=1	18	6	10	1	511	57.1	5.71	32.52
A0A6P9EGE9	uncharacterized protein LOC108994897 isoform X2 OS=Juglans regia OX=51240 GN=LOC108994897 PE=3 SV=1	5	6	9	6	1369	146.6	6.38	29.15	137.2	130.2	134.4	122.4	116.7	121.5	65.1	64.4	62.9	79.8	82	83.4
A0A6P9EZR1	casein kinase II subunit alpha-like OS=Juglans regia OX=51240 GN=LOC118349021 PE=3 SV=1	17	6	11	3	447	52.2	9.16	26.22	105.2	114.2	111.5	109.5	104.8	102.2	88.5	103.4	87.8	86	91.7	95.2
A0A833UP28	Methyltransferase OS=Juglans regia OX=51240 GN=F2P56_025263 PE=3 SV=1	15	5	11	2	375	42.1	6.71	36.72	131.8	129.9	127.3	174.7	165.5	167.8	45.1	44	48.8	54.5	54.6	55.9
A0A2I4E8A9	basic leucine zipper and W2 domain-containing protein 2-like OS=Juglans regia OX=51240 GN=LOC108987215 PE=3 SV=1	23	7	17	3	411	47.1	5.54	47.33	125	124	129.8	149.5	143.3	139.5	62.2	61	63.2	67.5	66.3	68.8
A0A2I4E8F1	Malic enzyme OS=Juglans regia OX=51240 GN=LOC108987244 PE=3 SV=1	14	8	17	3	588	64.8	7.01	46.29	90.6	85.5	83	78	75.3	83.8	123.2	124.3	126.7	105.5	113.3	110.8
A0A2I4DTC0	(S)-2-hydroxy-acid oxidase OS=Juglans regia OX=51240 GN=LOC108983267 PE=3 SV=1	22	8	25	8	367	40.3	9.26	59.02	128.6	131.4	130.5	122.2	122.9	119.9	68.8	70.6	72.1	77.5	76.4	79.1
A0A2I4ET63	Serine hydroxymethyltransferase OS=Juglans regia OX=51240 GN=LOC108992466 PE=3 SV=1	19	9	15	9	527	57	7.93	39.85	106	105	104.6	115.7	120.3	117.6	82.7	83.7	80.7	97.2	94.9	91.6
A0A833T835	PKS_ER domain-containing protein OS=Juglans regia OX=51240 GN=F2P56_036820 PE=3 SV=1	12	5	12	5	386	42.1	6.77	36.74	18.4	20.1	19.6	20.1	18.2	20.5	166.9	164.5	162.7	192.3	197	199.8
A0A2I4H2X4	uncharacterized protein LOC109013033 OS=Juglans regia OX=51240 GN=LOC109013033 PE=4 SV=1	7	9	13	9	1615	175.3	8.27	39.16	103	103.5	103.2	106.7	106	105.2	102.8	101.6	98.8	89.7	90	89.5
A0A2I4DMR6	UDP-glucose 4-epimerase OS=Juglans regia OX=51240 GN=LOC108981660 PE=3 SV=1	20	7	17	7	382	42.4	7.53	49.62	132.1	133.3	130	113.8	113.2	117.9	71.8	73.3	76.2	77.6	81.6	79.1
A0A288XPQ1	ATP synthase subunit alpha, chloroplastic OS=Juglans cathayensis OX=91213 GN=atpA PE=3 SV=1	19	8	20	7	507	55.4	5.21	64.94	79.4	80	75.8	80.3	86.4	85.3	118.8	115.3	116.3	119.9	118.8	123.7
A0A833UVS4	VWFA domain-containing protein OS=Juglans regia OX=51240 GN=F2P56_018919 PE=3 SV=1	8	2	8	2	404	42.8	4.67	29.55	70.9	69.6	71.4	81.7	83.3	77	115.9	123.2	117.8	133.3	129.2	126.7
A0A2I4GSY9	Sulfate adenylyltransferase OS=Juglans regia OX=51240 GN=LOC109010590 PE=4 SV=1	16	9	20	3	484	54.1	7.96	48.44	143.2	145.6	145.4	136.2	134.7	133.5	62.5	60.9	62.7	57.2	58.7	59.4
A0A6P9EW36	Mitochondrial Rho GTPase OS=Juglans regia OX=51240 GN=LOC109007813 PE=3 SV=1	9	5	8	4	647	71.9	5.43	29.13	97.1	99.2	97.6	102.1	99.7	101.6	102.5	97.8	101.4	100.2	99.9	100.9
A0A2I4DVN7	basic leucine zipper and W2 domain-containing protein 2-like OS=Juglans regia OX=51240 GN=LOC108983856 PE=3 SV=1	19	6	17	2	411	47.1	5.64	46.52	138.3	131.8	134.3	152.9	157.5	161.3	45	51.4	55.9	58	57.4	56.1
A0A2I4GCX1	Histone H4 OS=Juglans regia OX=51240 GN=LOC109006786 PE=3 SV=1	42	6	25	6	127	14.2	10.84	68.68	72.3	68.3	73.4	61.8	66.7	61	102.5	98.9	105.9	163	166.8	159.4
A0A833XNM2	Mitogen-activated protein kinase (Fragment) OS=Juglans regia OX=51240 GN=F2P56_013219 PE=3 SV=1	21	10	21	3	529	60	8.18	53.63	154.7	149.2	155.5	158.4	158.8	152.6	39.3	43.6	45.3	46.5	48.4	47.8
A0A2I4HAM3	probable N-succinyldiaminopimelate aminotransferase DapC isoform X1 OS=Juglans regia OX=51240 GN=LOC118343702 PE=4 SV=2	18	6	11	3	450	49.5	8.6	37.99	54.6	53.8	51.4	50.7	49.7	50.4	149.3	143.6	144.5	152	150.4	149.5
A0A2I4FTA8	mitochondrial phosphate carrier protein 3, mitochondrial-like OS=Juglans regia OX=51240 GN=LOC109001858 PE=3 SV=1	22	9	29	1	370	39.9	9.33	68.12	200.6	176.4	186.2	159.3	150.9	160.1	19.2	21.5	28.7	31	31.3	34.9
A0A833TU46	40S ribosomal protein S4 OS=Juglans regia OX=51240 GN=F2P56_032269 PE=3 SV=1	22	7	32	2	277	31.3	9.8	70.07	147.1	147.7	143.8	141.5	145.5	140.9	37.2	35.5	38.6	75	75.3	71.9
A0A1Z2RQ17	Photosystem II D2 protein OS=Platycarya strobilacea OX=91224 GN=psbD PE=3 SV=1	20	5	10	5	353	39.5	5.55	35.45	46.5	49.7	50.4	44.2	47.7	45.8	153.3	158.8	151.2	147.4	151.8	153.4
A0A2I4GMQ8	40S ribosomal protein S9-2 OS=Juglans regia OX=51240 GN=LOC109009236 PE=3 SV=1	42	8	30	8	197	23.1	10.37	67.14	135.1	135.9	132.7	127.9	131	130.6	56.1	59.4	59.8	77.9	77	76.6
A0A6P9ENZ2	Calcium-transporting ATPase OS=Juglans regia OX=51240 GN=LOC108980137 PE=3 SV=1	8	10	16	7	1073	117.1	6.93	43.58	85.7	82	86.9	86.4	84.7	83.7	118.6	119.3	127.2	107.2	109.2	109.1
A0A2I4HTS1	ATP citrate synthase OS=Juglans regia OX=51240 GN=LOC109021384 PE=3 SV=1	15	7	21	2	423	46.6	5.39	59.3	97.8	95.9	92.4	91.4	94.4	92.3	98.1	100.5	98.9	111.3	114.1	112.9
A0A833WUG9	Uncharacterized protein OS=Juglans regia OX=51240 GN=F2P56_036066 PE=4 SV=1	8	3	12	3	556	61.8	9.38	56.71	101.3	105.1	103.3	111.1	105.2	104.8	99.3	96.3	98.7	94.6	89.4	90.9
A0A2I4GMJ1	protein TPLATE-like isoform X2 OS=Juglans regia OX=51240 GN=LOC118343660 PE=4 SV=1	11	9	13	2	1031	114.1	6.58	36.7	89.9	85.1	90.3	75.8	79.9	82.9	139.2	131.2	128.6	105.2	102.1	89.7
A0A2I4F376	Glutamine synthetase OS=Juglans regia OX=51240 GN=LOC108995063 PE=3 SV=1	17	4	9	2	432	47.7	7.74	34.63	95.5	93.1	102	176	181.7	172.5	77.2	67.7	87.2	46.6	51.7	48.8
A0A2I4EA84	Protein disulfide-isomerase OS=Juglans regia OX=51240 GN=LOC108987759 PE=3 SV=1	16	5	17	1	360	39.4	5.72	49.5	102.7	105.3	105.9	105.6	111.6	111.9	96.5	98.4	92.5	96.3	87.3	86.1
A0A2I4GYV0	protein transport protein Sec61 subunit alpha-like OS=Juglans regia OX=51240 GN=LOC109012060 PE=3 SV=1	17	9	34	1	476	52.2	8.91	75.6	118.8	121.2	125.4	117.9	124	113.9	85.5	71.3	75.3	88.6	77.3	80.9
A0A2I4H932	dnaJ protein homolog OS=Juglans regia OX=51240 GN=LOC108979498 PE=3 SV=1	18	6	14	2	418	46.3	6.28	39.33	112	112.9	105	106	113.3	111	84.8	90.3	89	98.7	90.4	86.5
A0A2I4FV98	presequence protease 1, chloroplastic/mitochondrial-like OS=Juglans regia OX=51240 GN=LOC109002334 PE=4 SV=1	9	10	16	10	1086	121.7	5.72	46.48	95.9	93.5	90.6	94.3	97.1	94.8	102.2	101	98.7	108.7	112	111.2
A0A2I4F6M7	Succinate--CoA ligase [ADP-forming] subunit beta, mitochondrial OS=Juglans regia OX=51240 GN=LOC108996030 PE=3 SV=1	15	9	19	3	422	45.4	6.44	55.86	123	120.1	121.8	116.4	125.3	123.4	85.5	83.2	83.4	72.7	72.7	72.5
A0A2I4EI09	ras-related protein RABH1b OS=Juglans regia OX=51240 GN=LOC108989755 PE=4 SV=1	31	7	22	3	208	23	5.74	49.69	89.3	86.2	85.4	98.3	96.1	95.8	112.6	108.5	109	102.6	109.5	106.9
A0A833Y7E3	PfkB domain-containing protein OS=Juglans regia OX=51240 GN=F2P56_000170 PE=4 SV=1	16	5	42	5	344	36.8	6.33	123.37	174.9	173.7	174.3	183.2	182.3	180.2	17.8	19.6	23.2	23.6	23.8	23.3
A0A2I4GP23	Plasma membrane ATPase OS=Juglans regia OX=51240 GN=LOC109009578 PE=3 SV=2	7	5	18	1	824	90	5.86	54.67	95.5	95.8	105.5	103.5	89	96.2	100.2	95.8	103.4	105	97.2	112.9
A0A2I4EYK6	40S ribosomal protein S23 OS=Juglans regia OX=51240 GN=LOC108993887 PE=3 SV=1	28	4	17	4	142	15.7	10.45	48.85	159.8	163.8	166.4	130.4	131.6	132.9	52.2	49.5	51.7	53.8	54.3	53.6
A0A2I4GHY8	dynamin-related protein 1E-like OS=Juglans regia OX=51240 GN=LOC109008032 PE=3 SV=1	21	9	12	1	615	68.8	7.42	42.54	90.9	62.1	72.8	67.1	89	71	136.1	119.5	127.1	118.1	122.5	123.8
A0A2I4FDH0	guanine nucleotide-binding protein subunit beta-like protein OS=Juglans regia OX=51240 GN=LOC108997770 PE=3 SV=1	17	7	22	7	326	36.2	7.17	59.55	117.2	115.6	114.2	92.4	95.6	95.2	88.9	91.7	87.6	101.3	101.4	98.9
A0A2I4F622	Dihydroxy-acid dehydratase OS=Juglans regia OX=51240 GN=LOC108995890 PE=3 SV=1	13	7	14	7	613	65.5	6.84	38.32	67.8	69.4	65.6	73	72.5	74.6	126.4	125.6	126	133.5	131.7	134
A0A2I4FTI2	CLP protease regulatory subunit CLPX1, mitochondrial-like OS=Juglans regia OX=51240 GN=LOC109001910 PE=4 SV=2	10	7	10	7	697	75.5	7.21	32.65	143.2	150.4	148.1	166.1	164.6	165.1	40.8	42.2	46.5	45.2	45.2	42.5
A0A6P9DTY5	Calcium-transporting ATPase OS=Juglans regia OX=51240 GN=LOC108983177 PE=3 SV=1	8	7	13	1	1020	111.2	5.91	34.87	103.7	107.8	117.1	111.9	101	100.2	81.3	86.2	92.2	98.2	99.9	100.6
A0A2I4FTB3	V-type proton ATPase subunit C OS=Juglans regia OX=51240 GN=LOC109001860 PE=3 SV=1	18	6	14	6	376	42.9	6.09	44.96	91.2	93.5	95.5	93.7	93.7	98.6	114.9	117.4	116	97.2	94.5	93.7
A0A2I4GKQ6	protein STRICTOSIDINE SYNTHASE-LIKE 3-like OS=Juglans regia OX=51240 GN=LOC109008731 PE=3 SV=1	15	5	10	1	392	43.6	8.18	35.65	38.3	39.8	38.4	35.5	37.5	35.3	180.3	168.8	165.6	153.8	153.2	153.5
A0A2I4FKG0	Serine C-palmitoyltransferase OS=Juglans regia OX=51240 GN=LOC108999641 PE=3 SV=1	12	4	7	4	488	54	8.72	26.18	117.8	115.6	119.9	108.5	107.1	103.8	84	83.4	82.4	89.1	95	93.4
A0A833XS88	Alpha-1,4 glucan phosphorylase OS=Juglans regia OX=51240 GN=F2P56_010985 PE=3 SV=1	9	6	11	2	792	89.8	7.4	35.37	82.9	78.5	76.4	75.1	69.1	87.7	96.8	106.4	101.6	139.5	134.2	151.7
A0A2I4GHR6	vacuolar-sorting protein BRO1-like OS=Juglans regia OX=51240 GN=LOC109007972 PE=4 SV=2	12	9	14	3	869	97.6	6.57	38.73	84.4	85.8	90.2	86.8	88	84.8	125.7	127.6	127.7	99.9	100.8	98.3
A0A6P9E4V8	Protein ROOT HAIR DEFECTIVE 3 homolog OS=Juglans regia OX=51240 GN=LOC109007925 PE=3 SV=1	11	11	18	3	810	89.6	5.73	52.25	96.7	97.7	92.1	87.5	88.1	90.3	116.2	120.4	112.8	102.3	99.5	96.5
A0A6P9EKC0	uncharacterized protein LOC109009381 OS=Juglans regia OX=51240 GN=LOC109009381 PE=3 SV=1	13	4	9	2	319	35.4	4.87	32.65	64.2	63.8	61.3	59.7	60.9	58.9	136.4	140.5	135.3	147.1	134	137.8
A0A6P9F3T2	Eukaryotic translation initiation factor 3 subunit B OS=Juglans regia OX=51240 GN=LOC109000947 PE=3 SV=1	12	7	12	7	715	82.5	5.12	36.07	95.2	97.2	94.4	87.7	92.1	90.9	103	103.1	98.4	114.7	111.5	111.7
A0A2I4GKC4	N-terminal acetyltransferase A complex auxiliary subunit NAA15-like OS=Juglans regia OX=51240 GN=LOC109008634 PE=4 SV=1	11	10	12	2	903	103.4	7.17	33.31	116.4	118.1	117	110.2	113.1	108.4	83.4	84.2	86.6	89.5	86.6	86.5
A0A833X248	MPN domain-containing protein OS=Juglans regia OX=51240 GN=F2P56_026059 PE=3 SV=1	25	7	12	7	353	39.6	5.2	32.46	78.4	76.9	78.7	89.6	83.5	89	112.7	112.2	108.8	121.2	124.4	124.7
A0A6P9EH65	Exocyst complex component Sec8 OS=Juglans regia OX=51240 GN=LOC108992760 PE=3 SV=1	10	10	12	4	1072	119.4	6.06	34.77	105.7	109.8	112.4	108.2	105.8	106.1	101.4	97.4	101.7	83.7	84.5	83.4
A0A2I4FER8	peroxisomal ATPase pex6-like OS=Juglans regia OX=51240 GN=LOC108998137 PE=4 SV=2	9	7	12	6	1012	113.9	6	40.35	157.8	158.3	160.4	167.3	167.4	163.5	31	30.7	38.8	40.8	41.9	42.1
A0A2I4H0H3	60S ribosomal protein L30-like OS=Juglans regia OX=51240 GN=LOC109012456 PE=3 SV=1	21	3	24	1	112	12.4	9.69	71.5	81.4	77.1	84	82.2	84.1	91.6	91.2	95.9	94.6	130.4	147.9	139.5
A0A2I4HII1	bifunctional aspartate aminotransferase and glutamate/aspartate-prephenate aminotransferase-like OS=Juglans regia OX=51240 GN=LOC109018267 PE=3 SV=2	15	5	13	3	482	52.3	8.13	42.23	33.5	33.6	34	40.8	40.2	38	161.2	160.5	154	164.5	169.8	169.8
A0A2I4H6J1	Methyltransferase OS=Juglans regia OX=51240 GN=LOC109013948 PE=3 SV=1	17	5	12	2	360	40.1	6.54	38.06	111.9	120	118.5	112	109.5	117.6	66.2	88.3	72.3	97.4	97.2	89
A0A6P9EW83	protein TOPLESS-like isoform X2 OS=Juglans regia OX=51240 GN=LOC109005758 PE=4 SV=1	9	11	14	3	1138	124.9	7.12	38.62	81.8	80.6	82.4	83.5	82	79.5	114.8	116	111.1	123.2	124.5	120.6
A0A2I4DPW4	gamma carbonic anhydrase 1, mitochondrial OS=Juglans regia OX=51240 GN=LOC108982315 PE=4 SV=1	25	5	16	1	273	29.7	6.32	45.45	85.4	98	100.4	106.7	87.8	104.7	94.8	93.8	119.5	76.9	124	108.1
A0A2I4ER41	Ferritin OS=Juglans regia OX=51240 GN=LOC108991900 PE=3 SV=1	18	5	15	5	278	31.2	6.09	53.38	102.6	100.5	103.9	97.5	100.9	99.3	101.8	104.3	104.8	94.7	95.4	94.3
A0A2I4DGT3	Phospho-2-dehydro-3-deoxyheptonate aldolase OS=Juglans regia OX=51240 GN=LOC108980005 PE=3 SV=1	14	6	16	2	511	56.7	7.64	33.48	48.2	53.2	53.1	64.3	65.3	63.5	136.3	143.7	142.4	142.8	145.1	142.3
A0A2I4FY05	spliceosome-associated protein 130 A OS=Juglans regia OX=51240 GN=LOC109003022 PE=4 SV=1	9	10	14	2	1213	134.7	5.4	39.79	67.7	66.8	60.8	60.8	57.3	59.4	137.1	131.1	126.5	143.7	151.3	137.5
A0A2I4HMA2	GDP-mannose 4,6-dehydratase OS=Juglans regia OX=51240 GN=LOC109019459 PE=3 SV=2	20	8	23	8	368	41.3	7.44	60.96	100.1	102.9	100.5	101.2	103.3	102.3	96.5	98.3	98.6	98.6	97.1	100.6
A0A2I4GTG2	Cellulose synthase OS=Juglans regia OX=51240 GN=LOC109010729 PE=3 SV=1	8	7	11	2	1055	120.2	7.65	27.59	33.5	34.7	34.6	33.2	35.6	34.1	162.7	162.2	160.7	167.1	173.3	168.3
A0A6P9EHA5	elongation factor 1-gamma-like isoform X1 OS=Juglans regia OX=51240 GN=LOC108983723 PE=4 SV=1	12	6	24	2	423	48.2	6.58	64.45	119.5	109	104.1	109.6	118.3	112.2	86.3	95.8	88.2	84.8	87.5	84.7
A0A2I4F261	Protein-synthesizing GTPase OS=Juglans regia OX=51240 GN=LOC108994814 PE=4 SV=1	16	7	13	1	464	50.9	8.47	39.99	110.7	117.5	121.4	114.6	99.3	105	87	86.6	92.2	85.6	87.8	92.3
A0A2I4GLW3	RuvB-like helicase OS=Juglans regia OX=51240 GN=LOC109009020 PE=3 SV=1	17	5	7	5	458	50.3	6.1	26.86	69.6	67.1	72.9	88.8	81.1	77.5	123.6	118.9	123.9	119.9	129	127.7
A0A2I4E6C1	Lactoylglutathione lyase OS=Juglans regia OX=51240 GN=LOC108986682 PE=3 SV=1	21	7	17	6	359	39.9	7.4	49.69	62.6	62.7	63.2	64.3	62.8	63.4	134.2	132.1	128.3	137.2	144.7	144.5
A0A2I4H4R4	40S ribosomal protein S5 OS=Juglans regia OX=51240 GN=LOC109013482 PE=3 SV=1	30	8	21	8	207	23	9.48	56.13	95.1	95.2	97.3	108.9	109.7	107.4	95.7	95.3	93	104.4	98.7	99.3
A0A2I4DJC3	Protein disulfide-isomerase OS=Juglans regia OX=51240 GN=LOC108980698 PE=3 SV=1	18	5	17	2	361	40	5.33	46.73	124.3	127.6	122.4	123.2	122.4	116.9	71.4	77.2	76.2	80.4	78.5	79.4
A0A2I4E4K2	Glucose-6-phosphate 1-epimerase OS=Juglans regia OX=51240 GN=LOC108986102 PE=3 SV=1	18	7	10	3	311	35.3	6.62	31.17	104.4	101.8	104.2	91.6	86.3	87.3	104.9	106.3	103.2	95.9	105.8	108.3
A0A2I4FSF8	3-dehydroquinate synthase, chloroplastic-like OS=Juglans regia OX=51240 GN=LOC109001666 PE=3 SV=2	15	4	7	4	461	50	8.66	29.02	55.3	51.4	50.2	51.3	53.2	55.7	140.6	153	138.6	145.4	152.2	153
A0A286QZ20	Sucrose synthase OS=Juglans sigillata OX=224355 GN=SUS PE=2 SV=1	7	7	20	7	810	92.3	6.48	62.85	84.7	83.9	84.3	94.4	92.1	87.8	114	112.3	112.2	110.1	111.9	112.2
A0A2I4DKI1	Malate dehydrogenase OS=Juglans regia OX=51240 GN=LOC108981044 PE=3 SV=2	15	5	13	1	332	35.5	6.79	43.99	206	38.3	179.3	31.7	152.2	35.4	159.5	27.8	183.4	23.6	134.7	27.9
A0A2I4EIM0	exocyst complex component SEC10b-like OS=Juglans regia OX=51240 GN=LOC108989933 PE=4 SV=1	15	11	14	2	823	90.4	5.38	40.95	96.1	99.4	106.4	102.2	98.3	101.6	118.5	109	97.2	85.9	92	93.4
A0A2I4EAC9	villin-3-like OS=Juglans regia OX=51240 GN=LOC108987796 PE=4 SV=1	10	8	14	2	964	105.6	6.06	34.4	58.2	55.3	55.7	44.4	46.6	45.4	154.4	152.5	147	149	143.8	147.8
A0A2I4HVX2	50S ribosomal protein L23, chloroplastic OS=Juglans regia OX=51240 GN=LOC109021970 PE=3 SV=1	38	6	21	1	154	17.5	10.26	53.33	141	144.3	140.3	131.5	130.5	136.7	54.8	56.2	56.7	71.1	68.7	68.1
A0A2I4FD01	protein VAC14 homolog isoform X1 OS=Juglans regia OX=51240 GN=LOC108997630 PE=3 SV=1	14	9	13	9	720	80.8	5.87	38.04	100.2	103.1	105	103.3	103.1	100.8	102.8	96.7	98.1	93.2	97.7	96
A0A833TSC1	Ribosomal_S13_N domain-containing protein OS=Juglans regia OX=51240 GN=F2P56_028285 PE=3 SV=1	34	7	18	7	185	21.2	10.08	63.32	113	111	112.7	122	123	128.1	65.5	68	72.2	95.5	94.7	94.4
A0A343J2B8	Acetyl-CoA carboxylase submit beta-CT OS=Juglans regia OX=51240 PE=2 SV=1	9	5	14	5	498	56	4.7	39.06	92.5	94.6	95.6	99.5	97.6	98.2	112.1	109.4	114	95.5	96.9	94
A0A6P9E2I1	Eukaryotic translation initiation factor 5B OS=Juglans regia OX=51240 GN=LOC109018998 PE=4 SV=1	4	3	6	1	1384	152.6	5.34	24.94	116	110.1	119.4	112	111.4	107.6	87.1	82.4	85.6	90	91.7	86.8
A0A2I4FFR5	Pyruvate decarboxylase OS=Juglans regia OX=51240 GN=LOC108998404 PE=3 SV=1	12	6	15	4	585	63	6.28	47	68	70.8	69.3	64.2	61.7	62.1	137.5	135.8	133.2	133.1	130.6	133.7
A0A2I4DPI1	Catalase OS=Juglans regia OX=51240 GN=LOC108982204 PE=3 SV=1	12	5	19	3	492	56.9	7.14	54.18	154	153.3	151	140.7	139.7	139.7	47.5	45.9	49.1	58.8	61.9	58.5
A0A2I4HL76	ABC transporter B family member 20 isoform X1 OS=Juglans regia OX=51240 GN=LOC109019145 PE=4 SV=1	7	8	11	3	1399	155.1	6.52	30.68	46.2	47.1	49.5	52.9	55.2	56.4	162.7	170.2	163.7	131.6	129.7	134.8
A0A2I4F9P9	Tripeptidyl-peptidase II OS=Juglans regia OX=51240 GN=LOC108996808 PE=3 SV=1	8	9	14	5	1358	149.7	6.48	41.38	78.3	80.2	78.9	78.5	77.9	79.5	112.2	112.7	114.4	128.3	129.3	129.9
A0A2I4EAV1	ATP citrate synthase OS=Juglans regia OX=51240 GN=LOC108987913 PE=3 SV=1	18	6	19	1	423	46.7	5.67	50.51	141.7	150.1	141.9	157.1	154.7	153.5	37.4	38.9	43.5	60.4	60	60.7
A0A2I4GXD2	Protein transport protein SEC23 OS=Juglans regia OX=51240 GN=LOC109011706 PE=3 SV=1	8	6	11	5	771	84.7	5.68	42.25	86.8	89.2	88.1	79.8	83	80.8	127.6	129.2	125.9	100.6	105.2	103.9
A0A2I4DX02	4-hydroxy-4-methyl-2-oxoglutarate aldolase OS=Juglans regia OX=51240 GN=LOC108984202 PE=3 SV=1	32	4	11	4	166	17.8	5.31	37.36	88.5	87.7	93.7	94.8	87.9	92	109	106.6	105.4	107.8	112	114.5
A0A2I4H0D9	MA3 DOMAIN-CONTAINING TRANSLATION REGULATORY FACTOR 1-like OS=Juglans regia OX=51240 GN=LOC109012431 PE=3 SV=1	12	8	20	3	702	77.6	5.1	50.22	92.8	94.4	93.4	104.6	103.5	101	102.3	104	103.5	97.6	101.8	101.1
A0A2I4FLW9	mitochondrial phosphate carrier protein 3, mitochondrial-like OS=Juglans regia OX=51240 GN=LOC109000282 PE=3 SV=1	17	7	27	1	369	39.7	9.28	68.14	69.5	68.5	72.8	75.7	74.3	70.6	129.3	120.4	126.6	122.7	136	133.8
A0A2I4H8Y4	leucine aminopeptidase OS=Juglans regia OX=51240 GN=LOC109014554 PE=3 SV=1	13	6	15	6	612	69.4	5.55	36.26	94.6	94.3	97.9	88.9	88.9	87.1	109.6	108.6	109.1	107.6	104.8	108.6
A0A2I4EIS2	3-deoxy-8-phosphooctulonate synthase OS=Juglans regia OX=51240 GN=LOC108989961 PE=3 SV=1	24	6	17	6	290	31.6	6.93	47.41	118.5	115.2	113.6	115.1	115.9	115.8	75.6	79.7	79.2	90.9	89.5	91
A0A2I4FPN4	patellin-3 OS=Juglans regia OX=51240 GN=LOC109000981 PE=3 SV=1	10	5	19	2	546	61.3	5.14	60.58	42.1	40.5	40.9	39.3	40.6	40.8	154.3	155.9	152.4	162.8	168.1	162.2
A0A2I4EYW2	kinesin-like protein KIN-5D OS=Juglans regia OX=51240 GN=LOC108993968 PE=4 SV=1	11	11	13	11	1048	117.4	5.71	37.27	55.8	55.9	56.6	60.3	58.1	58.9	154.3	151.6	149	131	133.9	134.6
A0A0F6TFG5	Ribulose-1,5-bisphosphate carboxylase/oxygenase large subunit (Fragment) OS=Juglans regia OX=51240 GN=rbcL PE=4 SV=1	29	6	14	4	145	16	7.68	49.91	8.6	9.5	8.9	13.4	14.1	13.2	154.4	162.3	158.6	215.2	220.7	221.1
A0A2I4FCH2	40S ribosomal protein S27 OS=Juglans regia OX=51240 GN=LOC108997487 PE=3 SV=1	45	3	14	3	86	9.6	8.75	49.86	123	121	120.9	127.8	127.3	125.3	71.2	69.9	76.1	76.7	81.3	79.6
A0A2I4H1U5	developmentally-regulated G-protein 3 OS=Juglans regia OX=51240 GN=LOC109012785 PE=4 SV=1	29	9	12	9	368	41.2	8.56	34.55	94.1	87.9	91.4	99.2	99.8	97.1	102.2	102.4	103.7	103.5	109.7	108.9
A0A2I4FEZ0	oxygen-evolving enhancer protein 1, chloroplastic-like OS=Juglans regia OX=51240 GN=LOC108998186 PE=3 SV=1	24	5	8	2	331	35	5.9	23.85	36.8	33.7	33	36.8	39.4	37.7	161.8	152.5	154.3	167.1	169.9	176.8
A0A2I4DSN9	AP-4 complex subunit epsilon OS=Juglans regia OX=51240 GN=LOC108983090 PE=3 SV=1	9	10	19	5	982	107.5	6.29	44.53	86.7	85.6	85.4	84.8	85.4	84.4	118.1	118.8	116.1	109.3	114.3	111.2
A0A2I4EQV8	ARF guanine-nucleotide exchange factor GNOM OS=Juglans regia OX=51240 GN=LOC108991852 PE=4 SV=1	10	14	17	12	1467	164	6.02	37.73	93.7	96.4	100.2	93.6	95.4	94.7	108.3	107.3	107.6	100.6	100.4	101.9
A0A6P9EMX0	40S ribosomal protein S10-1-like OS=Juglans regia OX=51240 GN=LOC108997311 PE=4 SV=1	16	3	10	3	180	19.8	9.73	35.79	93.5	90.1	99.5	125.8	120.9	122.2	84.3	83	84.2	98.8	96.5	101
A0A2I4DUC2	40S ribosomal protein S15 OS=Juglans regia OX=51240 GN=LOC108983534 PE=3 SV=1	20	3	23	3	152	17.3	10.43	46.65	153	154.6	143.9	157	156.8	163	38.3	40.4	43.7	48.4	51.5	49.5
A0A2I4HC36	Transmembrane 9 superfamily member OS=Juglans regia OX=51240 GN=LOC109015699 PE=3 SV=1	7	4	8	1	658	74.2	6.62	26.21	100.6	84.2	103.3	102.7	83.8	100.3	103	108.8	105.9	89.5	110.3	107.6
A0A2I4E7K2	Alkaline/neutral invertase OS=Juglans regia OX=51240 GN=LOC108986996 PE=3 SV=1	13	6	12	3	571	65.3	6.71	38.97	76.6	74.3	72.8	62.1	67.6	62.2	118.6	133.1	122.1	128.4	144.5	137.8
A0A2I4E702	ABC-type xenobiotic transporter OS=Juglans regia OX=51240 GN=LOC108986854 PE=3 SV=1	5	8	14	7	1503	168.9	7.17	39.09	167.1	168.2	166.4	143.6	144.8	147.8	37.2	37	45.3	47.2	48	47.3
A0A2I4EP49	AP-4 complex subunit mu-like OS=Juglans regia OX=51240 GN=LOC108991394 PE=3 SV=1	18	7	12	4	476	53.7	8.34	35.58	84.4	85.3	86.3	79.8	77.1	79.7	125.5	125.4	121.3	108.6	112.1	114.5
A0A2I4HUY9	Phosphotransferase OS=Juglans regia OX=51240 GN=LOC109021721 PE=3 SV=1	10	4	12	3	498	53.8	6.33	39.06	102.8	101.3	103.6	77.6	83.8	78.1	104.2	109.6	105.6	115.1	112.8	105.5
A0A2I4EBJ2	Pro-apoptotic serine protease NMA111 OS=Juglans regia OX=51240 GN=LOC108988100 PE=3 SV=1	9	9	10	9	1113	122.5	6.01	33.79	95.4	96.1	101	97.9	98.6	97	100.7	99.8	95.1	100.1	108	110.3
A0A6P9F0L2	50S ribosomal protein L23, chloroplastic OS=Juglans regia OX=51240 GN=LOC109019150 PE=3 SV=1	39	6	20	1	155	17.6	10.18	51.14	138.8	133.2	133.8	114.4	116.2	123.1	62.6	63	63.7	75.3	87.6	88.2
A0A2I4E5T8	1,3-beta-glucan synthase OS=Juglans regia OX=51240 GN=LOC108986572 PE=3 SV=1	6	10	18	4	1896	216.7	8.15	44.62	73.3	74.1	73.6	75.5	75.3	76.1	124.9	130.7	121.8	124.6	126.5	123.7
A0A2I4EEQ0	elongation factor 1-gamma OS=Juglans regia OX=51240 GN=LOC108988927 PE=4 SV=1	14	6	28	1	422	48.2	6.28	71.18	118.8	124.4	120.7	118.5	118	116.6	70.7	82.3	72.7	89.7	79.4	88.2
A0A2I4EU47	Methionine--tRNA ligase OS=Juglans regia OX=51240 GN=LOC108992747 PE=3 SV=1	11	8	13	8	810	91.2	6.62	39.99	103	100.6	101.7	90.4	93.9	90.7	100.3	97.3	94.7	107.2	112.2	108.2
A0A2I4HND1	Protein-synthesizing GTPase OS=Juglans regia OX=51240 GN=LOC109019717 PE=4 SV=1	16	8	14	2	464	50.9	8.63	36.9	108.3	108.7	115.1	99.4	98.6	99	96	90.4	97	98.5	93.7	95.3
A0A2I4FAY0	Phosphoglucomutase (alpha-D-glucose-1,6-bisphosphate-dependent) OS=Juglans regia OX=51240 GN=LOC108997121 PE=3 SV=2	13	6	11	6	543	57.8	6.27	31.51	97.4	97.3	96.8	104.6	105.1	107	98.2	96.7	96.3	98.2	98.8	103.5
A0A2I4GAW6	RNA helicase OS=Juglans regia OX=51240 GN=LOC109006251 PE=4 SV=1	7	5	16	2	617	68.1	7.93	42.62	132	143.5	154.6	97.6	98.4	95.7	78	75.9	79.6	78.1	89.1	77.5
A0A2I4HVZ3	Thiamine thiazole synthase, chloroplastic OS=Juglans regia OX=51240 GN=LOC109022013 PE=3 SV=1	19	6	13	6	356	37.9	5.66	38.66	50.7	46.9	56.5	76.5	75.7	76.2	111.3	105.4	104.2	164.5	168.6	163.5
A0A2I4DQJ7	Proteasome subunit alpha type OS=Juglans regia OX=51240 GN=LOC108982478 PE=3 SV=2	26	6	16	6	278	30.7	9.67	51.92	73.2	74.9	76.4	73.2	79.8	77.3	121.5	123.5	117.1	135	123.3	124.7
A0A2I4DNN6	Profilin OS=Juglans regia OX=51240 GN=LOC108981956 PE=2 SV=1	24	2	24	1	131	14	5.02	77.61	159	160	159.4	169.4	167.7	182.2	31.1	31.9	35.5	32.4	36.8	34.7
A0A2I4GVJ9	2,4-dienoyl-CoA reductase ((3E)-enoyl-CoA-producing) OS=Juglans regia OX=51240 GN=LOC109011254 PE=4 SV=1	20	4	7	4	297	31.7	9.11	21.81	149.4	156.3	154.7	148	153.1	143.5	45.8	43.4	47.2	52.2	52.9	53.5
A0A2I4F974	Aspartate aminotransferase OS=Juglans regia OX=51240 GN=LOC108996646 PE=3 SV=1	19	8	15	8	424	47.7	7.36	45.55	144.2	141.9	137.6	150	152.9	149.3	48	47.7	55	58.2	58.4	56.9
A0A2I4F2X2	Mitogen-activated protein kinase OS=Juglans regia OX=51240 GN=LOC108994997 PE=3 SV=1	16	8	13	3	550	62.4	8.13	38.85	93.4	97.4	88.5	106.7	104.9	96.7	99.4	108	101.7	99.9	98	105.4
A0A2I4DTC3	Pyruvate dehydrogenase E1 component subunit beta OS=Juglans regia OX=51240 GN=LOC108983269 PE=4 SV=1	26	7	12	7	407	44.4	6.84	34.48	102.8	103.6	115.1	106.8	118.5	120.2	80.5	77.6	77.5	98.8	83	115.7
A0A833UDM5	Uncharacterized protein OS=Juglans regia OX=51240 GN=F2P56_029677 PE=3 SV=1	20	8	10	8	486	55.2	8.81	30.17	81.6	80.5	81.6	74.4	73.9	72.6	120.6	119.6	122.4	127.6	124.2	121
A0A2I4FD67	rac-like GTP-binding protein ARAC1 isoform X2 OS=Juglans regia OX=51240 GN=LOC108997691 PE=3 SV=1	27	6	11	2	197	21.5	9.11	32.62	165	166.4	181	143	150.5	143.8	37.7	33.9	36.8	39.7	60.6	41.4
A0A2I4HEE1	protein transport protein SEC13 homolog B OS=Juglans regia OX=51240 GN=LOC109016601 PE=3 SV=2	24	6	12	3	301	32.7	6.16	37.11	100.1	100.7	107.1	93.6	98.3	95	114.4	108.5	106.3	99	87.4	89.8
A0A2I4H540	D-3-phosphoglycerate dehydrogenase OS=Juglans regia OX=51240 GN=LOC109013564 PE=3 SV=1	10	6	25	1	597	63	6.81	68.27	40.3	37.8	35.5	39.3	41.3	39.9	136.5	146.7	139.4	180.5	182.2	180.6
A0A2I4FEH4	ABC transporter B family member 9 OS=Juglans regia OX=51240 GN=LOC108998061 PE=4 SV=2	7	7	10	2	1279	137.7	8.31	28.45	105.9	105.6	125.3	102.7	109.5	88.3	89.5	87.9	80.5	90.8	85.8	128.3
A0A2I4EWF5	NAD(P)H dehydrogenase (quinone) OS=Juglans regia OX=51240 GN=LOC108993306 PE=3 SV=1	13	3	31	3	203	21.7	6.55	86.04	74.9	73.3	70.6	75.9	73.6	73.8	121.3	123.9	118.6	134.5	130.8	128.7
A0A2I4GRT4	vacuolar protein sorting-associated protein 32 homolog 2-like OS=Juglans regia OX=51240 GN=LOC109010274 PE=4 SV=1	35	6	12	1	217	24.2	4.89	41.39	80.9	101.3	95.6	122.4	103.3	119.4	105.4	91.6	97.3	94.2	95.7	92.7
A0A2I4EP35	uncharacterized TPR repeat-containing protein At1g05150-like OS=Juglans regia OX=51240 GN=LOC108991372 PE=4 SV=1	9	8	10	2	796	89.4	6.25	30.07	68.2	64.1	70.1	66.5	66.6	69.7	152.1	154.2	150	113.8	111.8	113
A0A2I4EF24	Ribosomal protein L19 OS=Juglans regia OX=51240 GN=LOC108989019 PE=3 SV=1	17	3	21	3	209	24.4	11.5	49.94	187	188.6	192.6	112.2	114.6	117.1	50.7	52.8	55.2	44.4	43.2	41.5
A0A833XHW3	Glycerol kinase OS=Juglans regia OX=51240 GN=F2P56_016693 PE=3 SV=1	15	7	28	7	471	50.6	6.35	65.65	184.7	184.9	181.9	147.8	157.1	153.1	27.6	26.4	33.3	33.1	36.6	33.5
A0A833XHL8	Serine/threonine-protein phosphatase 2A 55 kDa regulatory subunit B OS=Juglans regia OX=51240 GN=F2P56_016391 PE=3 SV=1	16	6	10	1	511	57.1	5.97	29.75	114.7	111.7	120.2	122.3	114.1	114.3	81.1	85.3	84.7	83.9	82.7	85
A0A2I4EF39	Eukaryotic translation initiation factor 3 subunit I OS=Juglans regia OX=51240 GN=LOC108989027 PE=3 SV=1	21	6	13	6	326	35.8	7.37	41.2	112.2	111.6	109.2	116.4	117	119.6	84.6	86.9	88.5	85.4	83.2	85.4
A0A2I4E1X7	ureidoglycolate hydrolase OS=Juglans regia OX=51240 GN=LOC108985520 PE=4 SV=2	14	5	7	5	471	51.1	5.73	24.09	72.5	65.8	73	75.9	73.9	74.6	128.1	120.7	116	133.6	135.4	130.6
A0A2I4F2K8	Pyruvate decarboxylase OS=Juglans regia OX=51240 GN=LOC108994918 PE=3 SV=1	9	5	15	3	606	65.2	6.15	43.1	131.1	132.5	129.2	124	113.7	119.3	77.4	73.5	71.9	74.3	74.3	78.8
A0A2I4FI19	Inosine-5'-monophosphate dehydrogenase OS=Juglans regia OX=51240 GN=LOC108998973 PE=3 SV=2	10	4	9	4	499	53.4	6.11	29.96	137.2	143.2	140.2	132.1	130.5	132.5	65.3	61	60.9	67.2	67.8	62.1
A0A2I4GD19	60S ribosomal protein L22-2 OS=Juglans regia OX=51240 GN=LOC109006844 PE=3 SV=1	40	5	21	2	124	14.1	9.55	54.78	118	109.7	113.3	126.2	130.5	130.2	64.3	66	67	89.8	90	95
A0A2I4H5E4	Ubiquitin-fold modifier 1 OS=Juglans regia OX=51240 GN=LOC109013661 PE=3 SV=1	62	5	12	5	93	9.7	9.25	36.95	119.9	120.6	123	143.2	143	142.6	66.9	62.7	66.4	70.5	71.1	70.2
A0A2I4EHI7	Carbamoyl-phosphate synthase (glutamine-hydrolyzing) OS=Juglans regia OX=51240 GN=LOC108989639 PE=3 SV=1	6	8	15	8	1197	131.1	5.97	40.35	84.7	82.9	88.1	84.9	83.2	86.7	108.2	113.3	114	119.3	117.2	117.5
A0A6P9E3F3	Mitogen-activated protein kinase OS=Juglans regia OX=51240 GN=LOC109013778 PE=3 SV=1	16	8	17	1	630	71.5	7.72	47.11	137.6	162	169	163.4	157.7	142.1	44.4	35.9	39.1	54.1	45.3	49.3
A0A2I4GAC5	Ribose-phosphate diphosphokinase OS=Juglans regia OX=51240 GN=LOC109006127 PE=3 SV=2	13	6	9	1	414	44.9	8.35	30.99	107.4	131.5	104.5	112.4	102.5	114	88.5	77.4	79.9	98.2	92.1	91.6
A0A2I4GM74	Nicotinate phosphoribosyltransferase OS=Juglans regia OX=51240 GN=LOC109009093 PE=3 SV=1	10	4	5	4	562	62.8	6.65	19.53	146	148.3	146	134.8	133.1	123	51.9	53	56.3	71.4	69.9	66.5
A0A2I4GJN5	Threonine dehydratase OS=Juglans regia OX=51240 GN=LOC109008462 PE=3 SV=2	12	7	8	7	619	67.7	6.24	26.72	110.3	107.6	117.5	111.2	112.5	112	94.6	95.4	98.2	81.2	80.1	79.2
A0A2I4FZK9	Sucrose-phosphate synthase OS=Juglans regia OX=51240 GN=LOC109003426 PE=3 SV=2	10	10	14	9	1066	119.8	6.44	33.16	171.2	168.2	171.3	178.4	175.8	180.1	16.7	21.8	30.8	28.4	28	29.3
A0A2I4FSB2	vacuolar protein sorting-associated protein 32 homolog 2-like OS=Juglans regia OX=51240 GN=LOC109001638 PE=4 SV=1	34	6	11	1	218	24.2	4.94	37.45	90.7	89.6	93.4	124.3	116.2	120.6	96.5	92.2	99.1	88.8	92.2	96.3
A0A6P9EHH0	L-ascorbate peroxidase OS=Juglans regia OX=51240 GN=LOC109017737 PE=3 SV=1	11	6	15	4	444	48	8.57	42.49	91	100.6	100.8	106.1	107.3	113.6	103.4	97.8	98.3	99	88.8	93.3
A0A2I4F0A4	Acyl-coenzyme A oxidase OS=Juglans regia OX=51240 GN=LOC108994365 PE=3 SV=1	15	12	22	6	664	74.1	7.78	50.56	139.5	136.8	131.9	113.1	117.4	117	66.8	71.6	72.4	82.5	76.1	74.8
A0A2I4GAY9	Non-specific serine/threonine protein kinase OS=Juglans regia OX=51240 GN=LOC109006307 PE=4 SV=1	18	8	11	8	505	57.8	8.78	28.68	107.2	102.3	104.3	104.4	101.8	99.7	97.6	97.7	98.1	92.5	99.8	94.7
A0A2I4EDD3	RuvB-like helicase OS=Juglans regia OX=51240 GN=LOC108988561 PE=3 SV=1	16	6	11	6	464	51.2	5.47	38.18	79.4	80.3	79.7	82.9	80.2	80	120.9	117.1	110.7	125	117	126.7
A0A833XVR2	GATase domain-containing protein OS=Juglans regia OX=51240 GN=F2P56_005459 PE=3 SV=1	16	6	8	6	497	54.9	6.42	22.02	83	85.1	80.4	91.1	90.6	94.9	109.5	108.9	111.6	114.4	114	116.6
A0A2I4HS03	60S ribosomal protein L10 OS=Juglans regia OX=51240 GN=LOC109020863 PE=4 SV=1	28	7	15	7	220	25	10.55	45.36	148.4	153.6	154.9	133	137.1	138.7	47.1	45.6	47.7	62.9	65.6	65.4
A0A2I4F3M4	ERBB-3 BINDING PROTEIN 1-like isoform X1 OS=Juglans regia OX=51240 GN=LOC108995182 PE=3 SV=1	13	5	15	1	395	43.6	6.42	37.77	141.7	142.5	136.8	126.8	143.9	139.9	60.7	61.9	66.2	58.8	58.6	62.2
A0A6P9F2Y9	ABC transporter B family member 4-like OS=Juglans regia OX=51240 GN=LOC109000486 PE=4 SV=1	8	9	12	1	1295	140.3	8.51	31.88	179.1	180.2	178	135.3	134.9	139	38.7	43.8	44.2	43.9	41.3	41.4
A0A2I4GRR3	40S ribosomal protein S18 OS=Juglans regia OX=51240 GN=LOC109010259 PE=3 SV=1	29	4	19	4	152	17.5	10.56	43.93	110.3	109.4	109	108.1	115.6	115.8	81.8	77.3	81.4	99.4	97.1	94.7
A0A833XN61	Iso_dh domain-containing protein OS=Juglans regia OX=51240 GN=F2P56_008587 PE=3 SV=1	22	6	15	6	326	36	7.42	56.18	132.3	128.1	129.9	130.7	132.3	129.9	69.9	67.6	69.7	73.5	67.3	68.8
A0A2I4F963	ATP-dependent zinc metalloprotease FTSH 2, chloroplastic OS=Juglans regia OX=51240 GN=LOC108996638 PE=3 SV=1	15	6	7	6	691	74.2	6.06	22.48	59.7	58.5	66.7	72.8	67	67.7	134	135.5	130.7	128.8	139.8	138.8
A0A2I4DEV8	Methyltransferase OS=Juglans regia OX=51240 GN=LOC108979473 PE=3 SV=1	12	7	11	5	612	69.3	8.03	32.87	148.8	147	148.9	144.1	146.3	143.1	50.4	54.6	55.2	54.2	51.5	56
A0A2I4E7W4	60S ribosomal protein L7a OS=Juglans regia OX=51240 GN=LOC108987080 PE=3 SV=1	29	7	20	7	259	29.3	10.24	48.93	140.6	139.4	139.1	135.9	138.7	137	51.4	51.4	54.5	72.8	68.9	70.4
A0A2I4HKA0	Mitochondrial proton/calcium exchanger protein OS=Juglans regia OX=51240 GN=LOC109018848 PE=3 SV=1	9	5	7	1	758	85.5	5.82	25.39	100	109.8	108.3	128.5	122.8	137.1	79.5	85.9	83.6	78.1	78.1	88.4
A0A2I4DJ78	protein usf OS=Juglans regia OX=51240 GN=LOC108980651 PE=4 SV=1	12	2	10	2	277	29.9	7.05	30.17	29.9	29.4	28.4	32.2	35.2	35.5	194.4	192.3	190.6	143.6	143.9	144.6
A0A833YAJ0	Uncharacterized protein OS=Juglans regia OX=51240 GN=F2P56_003088 PE=3 SV=1	7	9	11	3	1510	170.7	7.72	34.91	31.3	35.7	33	32.6	39	34.6	192	184.4	184.7	144.8	146.3	141.5
A0A2I4ENX0	Ornithine carbamoyltransferase OS=Juglans regia OX=51240 GN=LOC108991348 PE=3 SV=1	12	4	11	4	385	42.3	7.75	29.04	101.2	102	103.5	113.3	108.2	111.7	94.5	92.8	89.1	95.2	91.6	96.8
A0A2I4GBS4	SH3 domain-containing protein 2-like OS=Juglans regia OX=51240 GN=LOC109006528 PE=4 SV=1	13	4	10	1	371	41.3	6.47	32.34	85.4	87.2	87.1	94.1	84.9	88.1	125.1	121	118.8	103.7	109.5	95
A0A833TEN4	Glyco_hydro_3 domain-containing protein OS=Juglans regia OX=51240 GN=F2P56_032010 PE=4 SV=1	13	5	11	2	434	47.6	9.2	35.55	183.6	184.3	187.7	122.7	121.2	122.4	43.1	44.1	47	48.2	50.9	44.8
A0A2I4DV10	ABC transporter B family member 21-like isoform X2 OS=Juglans regia OX=51240 GN=LOC108983709 PE=4 SV=1	7	9	13	1	1285	139.3	8.81	36.94	96.9	97.8	101.8	85.5	86.3	86.4	111.5	107.2	106.9	108.6	105.1	106
A0A6P9EQR9	Endoglucanase OS=Juglans regia OX=51240 GN=LOC108999468 PE=3 SV=1	11	6	7	6	618	68.4	8.85	24.42	30.7	31	34.7	36.9	36.1	40.6	156.8	158.6	157	174.8	172.5	170.3
A0A288XQT3	Photosystem II protein D1 OS=Juglans major OX=91217 GN=psbA PE=3 SV=1	20	6	12	6	353	38.9	5.25	31.2	65.7	64	64.3	61	61.7	64.7	144.8	139.5	134.6	132.2	132.5	135
A0A2I4DRL8	protein GID8 homolog isoform X1 OS=Juglans regia OX=51240 GN=LOC108982782 PE=4 SV=1	27	5	6	5	242	27.5	4.67	27.04	111.5	108.2	109	142.2	129.9	137.2	73.4	71.2	78.4	78.3	79.6	81.2
A0A2I4HV41	probable fructokinase-6, chloroplastic OS=Juglans regia OX=51240 GN=LOC109021747 PE=3 SV=1	23	8	16	6	384	41.3	5.63	40.36	95.5	94.1	88.9	88.6	87.4	86	112.9	107.7	108.2	108.4	113.1	109.2
A0A2I4FIW5	hypersensitive-induced response protein-like protein 1 OS=Juglans regia OX=51240 GN=LOC108999215 PE=4 SV=1	22	6	14	2	285	31.3	5.94	39.27	50.7	54.1	51.2	59.2	57.5	55.4	167.3	168.7	160.3	128.5	123.8	123.4
A0A2I4DY25	Aspartate carbamoyltransferase OS=Juglans regia OX=51240 GN=LOC108984511 PE=3 SV=1	18	7	10	7	398	44.9	5.66	30.21	80.6	82.3	82.1	82.6	80.8	83.5	124.2	125.4	124.7	108.5	112.7	112.5
A0A2I4DZM2	Sulfate adenylyltransferase OS=Juglans regia OX=51240 GN=LOC108984940 PE=4 SV=2	14	7	14	1	483	54.3	7.4	40.09	100	96.8	99.6	81.5	86.4	90.9	111.2	121.5	108.4	111	98.5	94.2
A0A2I4FCA1	uncharacterized protein LOC108997437 isoform X1 OS=Juglans regia OX=51240 GN=LOC108997437 PE=4 SV=1	8	6	12	1	844	93.6	6.24	33.24	135.3	150.3	161.8	159	139.8	154.9	47.8	44.2	41.7	48.7	66.8	49.8
A0A2I4EEB5	GDSL esterase/lipase At5g33370-like OS=Juglans regia OX=51240 GN=LOC108988817 PE=3 SV=1	20	4	7	2	371	40.6	8.13	23.64	37.1	31	39.4	32.9	44.5	36.2	279.1	263.9	271	52	54.9	57.9
A0A833XT43	Malate dehydrogenase OS=Juglans regia OX=51240 GN=F2P56_003726 PE=3 SV=1	18	5	17	4	298	31.8	5.39	52.65	94.1	96.9	93.1	93.8	98.7	103.7	106.2	109.8	106.1	103.6	98	96.2
A0A2I4ENT0	calcium-dependent protein kinase 11-like OS=Juglans regia OX=51240 GN=LOC108991330 PE=3 SV=1	21	8	9	3	498	56	5.91	23.64	139.1	139.9	144.8	134.9	136.1	133.8	60.3	64	58.6	63.2	64.4	60.8
A0A2I4EIZ8	Phosphoglycerate mutase (2,3-diphosphoglycerate-independent) OS=Juglans regia OX=51240 GN=LOC108990002 PE=3 SV=1	8	6	23	6	559	61.3	5.53	50.09	110.2	107.5	103.9	109.2	110.9	106.8	86.7	88.4	88.3	101.3	93.6	93.1
A0A2I4FMU2	chaperone protein dnaJ 10-like OS=Juglans regia OX=51240 GN=LOC109000508 PE=4 SV=1	13	4	6	4	397	43.9	5.8	22.61	42	41.3	39.8	48.8	46.8	48.3	180.9	188.4	178.8	125.2	131.1	128.6
A0A833X1W6	Lysine--tRNA ligase OS=Juglans regia OX=51240 GN=F2P56_025832 PE=3 SV=1	11	8	16	8	665	75.5	6.71	37.08	87.4	86.5	85.4	92	87.8	90.1	107.2	107.5	105.3	116.7	117.2	117
A0A2I4DPJ8	probable manganese-transporting ATPase PDR2 OS=Juglans regia OX=51240 GN=LOC108982215 PE=3 SV=1	6	8	12	2	1193	132.3	8.44	33.57	113.4	117.4	126	98	95.1	99.7	99.2	100.9	103.8	80.4	85	81
A0A2I4FYT1	Glucose-6-phosphate 1-dehydrogenase OS=Juglans regia OX=51240 GN=LOC109003215 PE=3 SV=1	14	8	10	4	602	67.7	8.44	29.12	104.8	109	104.7	103.2	98.5	100.6	97.1	96.8	100.8	97.8	95.8	91
A0A2I4EH25	Terpene cyclase/mutase family member OS=Juglans regia OX=51240 GN=LOC108989528 PE=3 SV=1	10	8	13	8	757	86	6.68	36.16	130.3	132.3	130.9	118.6	121	120.8	66.7	65.6	66.9	80.4	82.6	84.1
A0A2I4EJ21	Ethanolamine-phosphate cytidylyltransferase OS=Juglans regia OX=51240 GN=LOC108990014 PE=3 SV=1	20	7	8	7	414	46	7.59	26.87	138.4	131.2	138.8	123.4	120.8	123.4	73.4	69.7	72	73	67.2	68.8
A0A2I4HE98	bifunctional dTDP-4-dehydrorhamnose 3,5-epimerase/dTDP-4-dehydrorhamnose reductase OS=Juglans regia OX=51240 GN=LOC108990870 PE=4 SV=1	14	4	22	1	302	33.6	6.57	48.08	150.7	173	216.4	112.7	160.5	169.4	40.5	41.4	38.1	37.6	29.4	30.2
A0A2I4EZI6	Importin subunit alpha OS=Juglans regia OX=51240 GN=LOC108994156 PE=3 SV=1	12	6	8	2	529	58.5	5.21	26.36	55.3	51.2	59.9	58.5	50.9	56.4	156	153.5	168.1	117.1	143.2	129.8
A0A2I4FEU6	NADH dehydrogenase [ubiquinone] flavoprotein 2, mitochondrial OS=Juglans regia OX=51240 GN=LOC108998150 PE=3 SV=1	22	6	13	6	253	28.4	8.27	29.97	97.7	96.1	97.8	123.6	122.4	121.6	82.5	89.7	89.8	93	95.8	90.1
A0A833X793	Methenyltetrahydrofolate cyclohydrolase (Fragment) OS=Juglans regia OX=51240 GN=F2P56_018522 PE=3 SV=1	20	4	8	4	331	35.4	8.88	27	109.6	106.3	108.9	108.5	112.3	110.8	83.9	81.6	85.8	96.7	96.3	99.3
A0A2I4F4W8	Glucose-6-phosphate isomerase OS=Juglans regia OX=51240 GN=LOC108995559 PE=3 SV=1	9	5	16	5	572	62.9	6.86	42.45	122.9	123.5	126	110.4	113	113.2	85.9	78.4	80	86.8	78.5	81.4
A0A6P9E8S7	spermidine synthase 1 OS=Juglans regia OX=51240 GN=LOC109019840 PE=3 SV=1	12	3	10	2	344	37.9	5.19	34.46	99.8	96.2	100.5	116.7	123.5	117.3	82.3	84.8	89.2	92.3	94.7	102.5
A0A2I4DHC8	Isoleucine--tRNA ligase OS=Juglans regia OX=51240 GN=LOC108980148 PE=3 SV=1	7	8	14	8	1181	134.3	6.32	41.79	91.3	93.1	93.2	97.8	92.1	92.3	101.9	101.3	100.4	111.6	112.1	112.8
A0A2I4FRJ9	AP-4 complex subunit epsilon OS=Juglans regia OX=51240 GN=LOC109001428 PE=3 SV=1	7	7	13	2	975	107.2	5.95	41.57	78	79.9	82.8	75.2	75.8	76.4	127.3	119.9	122.3	116.6	127.3	118.4
A0A2I4GDQ6	serine/threonine-protein kinase SRK2A OS=Juglans regia OX=51240 GN=LOC109007013 PE=3 SV=1	16	5	8	1	354	40.3	6.32	27.6	102.2	104.2	101.4	115.6	116.9	108.8	96.7	92.4	100	93.9	84.7	83.2
A0A2I4GVW2	hsp70-Hsp90 organizing protein 3-like OS=Juglans regia OX=51240 GN=LOC109011336 PE=4 SV=1	11	8	15	2	576	65.1	6.07	34.27	112.4	113.3	116.6	97.2	107.9	105.3	98.9	99.4	101.8	87.3	80.5	79.5
A0A2I4GD13	60S ribosomal protein L18-2-like OS=Juglans regia OX=51240 GN=LOC109006837 PE=3 SV=1	28	5	14	2	187	20.9	11.08	39.88	175.1	175.2	164.6	147.8	146.4	148.9	29.5	31.2	35.2	48.4	49.7	48.1
A0A2I4FRU3	Clustered mitochondria protein homolog OS=Juglans regia OX=51240 GN=LOC109001509 PE=3 SV=1	7	9	10	9	1407	153.4	6.35	30.39	135.5	137.7	142.2	137.8	130.6	136	55	57.6	59.7	70.1	71.6	66.2
A0A343J2B7	Acetyl-CoA carboxytransferase OS=Juglans regia OX=51240 PE=2 SV=1	8	5	10	1	769	85.7	9.17	33.25	108.3	114.8	110.3	127.2	120.9	119.3	87.9	91.9	92.6	77.8	72.6	76.4
A0A2I4ER46	Superoxide dismutase OS=Juglans regia OX=51240 GN=LOC108991905 PE=3 SV=1	7	2	6	2	223	24.9	8.28	28.58	64.6	61.6	58.8	79.5	83.8	82	129	128.9	131.5	127.8	126.5	126
A0A2I4GVH5	rac-like GTP-binding protein RHO1 OS=Juglans regia OX=51240 GN=LOC109011240 PE=3 SV=1	32	7	10	2	196	21.6	8.98	27.41	122	125	127	112.2	112.5	112.4	85.6	84.8	89.9	75.7	72.3	80.5
A0A2I4FJ33	probable aldehyde dehydrogenase isoform X2 OS=Juglans regia OX=51240 GN=LOC108999249 PE=3 SV=1	14	7	15	7	554	61.7	6.96	42.94	115.6	118.1	116.4	122.1	118.4	120.5	84.3	86	83.4	78.7	80.8	75.7
A0A2I4FY02	ABC transporter B family member 20-like OS=Juglans regia OX=51240 GN=LOC109003031 PE=4 SV=2	7	7	8	2	1399	155.4	6.4	25.44	79	78.3	68.3	77.7	94.7	79.7	126.6	114.3	117.4	122	122.2	119.7
A0A2I4DJG2	Conserved oligomeric Golgi complex subunit 8 OS=Juglans regia OX=51240 GN=LOC108980743 PE=3 SV=1	11	6	11	6	573	63.7	5.15	27.98	99.2	103.5	105.1	106.5	104.3	104.5	94.5	100.1	104.5	88.5	96.2	93
A0A385G2L2	Ribulose bisphosphate carboxylase large chain (Fragment) OS=Juglans regia OX=51240 GN=rbcL PE=3 SV=1	39	4	16	2	184	20.4	7.24	52.89	34.1	31.8	35.4	26.9	27.7	31.1	150.1	152	145.4	186.7	190.9	188
A0A2I4EAS8	Importin subunit alpha OS=Juglans regia OX=51240 GN=LOC108987897 PE=3 SV=1	11	5	8	1	540	59.8	5.27	26.01	84.1	79.5	76.3	85.9	80.8	88.8	113.5	119	123.3	127.7	115.3	105.6
A0A2I4GWA1	Eukaryotic translation initiation factor 5B OS=Juglans regia OX=51240 GN=LOC109011424 PE=4 SV=1	3	3	5	1	1372	151.1	5.25	21.62	129.4	130.7	133.1	130.2	133.7	133.4	71.1	62.3	77.4	67.3	66.7	64.6
A0A2I4H7Y8	Dihydrolipoyllysine-residue succinyltransferase OS=Juglans regia OX=51240 GN=LOC109014304 PE=3 SV=1	10	5	14	1	471	51.6	9.26	35.69	107	108.5	114	121.3	121.8	129.8	84.5	91	96	71.6	81.7	72.7
A0A2I4EG22	dynamin-related protein 5A OS=Juglans regia OX=51240 GN=LOC108989253 PE=3 SV=1	18	8	12	1	609	68.5	7.61	33.29	52.7	48.8	53.4	61.7	58.2	56.2	145.2	140.2	153.9	151.1	146.5	132.3
A0A2I4F474	oxygen-evolving enhancer protein 1, chloroplastic OS=Juglans regia OX=51240 GN=LOC108995342 PE=3 SV=1	16	4	7	1	332	35.2	7.71	22.8	39.3	45.4	42.7	44.4	39.5	51.3	167.8	156.3	144.2	152.8	165.5	150.8
A0A6P9ECZ0	uncharacterized protein LOC109021181 isoform X2 OS=Juglans regia OX=51240 GN=LOC109021181 PE=4 SV=1	9	6	13	1	739	82.1	6.29	38.89	199.8	199.1	181.9	169.9	178.4	180.4	9.2	8.7	17.2	18.1	19.3	18.1
A0A834DAI7	3-hydroxyacyl-[acyl-carrier-protein] dehydratase (Fragment) OS=Juglans regia OX=51240 GN=F2P56_001529 PE=3 SV=1	22	5	16	5	261	28.5	9.51	33.52	64.3	66.7	65.7	76.7	77.8	72.8	125.1	122.8	127.7	132.3	135.4	132.6
A0A2I4GVV3	Assimilatory sulfite reductase (ferredoxin) OS=Juglans regia OX=51240 GN=LOC109011330 PE=3 SV=1	10	7	9	1	688	77.6	9.26	24.02	80.1	89	94.7	92.8	94.7	99.7	98.1	95.8	99.7	112.3	117.7	125.5
A0A2I4DIK0	brefeldin A-inhibited guanine nucleotide-exchange protein 2-like OS=Juglans regia OX=51240 GN=LOC108980487 PE=4 SV=1	4	8	12	2	1767	197.2	5.87	32.07	89.5	87.7	87.7	81.1	82.9	81.3	131	123.8	123.2	99.5	107.6	104.7
A0A2I4GRK9	ATP-dependent 6-phosphofructokinase OS=Juglans regia OX=51240 GN=LOC109010220 PE=3 SV=1	9	5	10	2	492	54.2	6.48	30.5	60.8	64.8	58.3	71.3	63.7	68.4	138.7	132.1	138.7	133.2	134.9	135.1
A0A2I4G999	Long-chain-fatty-acid--CoA ligase OS=Juglans regia OX=51240 GN=LOC109005861 PE=4 SV=1	6	5	10	2	694	76.3	7.49	26.98	159.6	158.6	154.8	132.4	135.1	131.5	48.9	50.7	54.9	57.7	58.8	57
A0A833TPC8	UDP-glucuronate decarboxylase (Fragment) OS=Juglans regia OX=51240 GN=F2P56_027339 PE=3 SV=1	16	8	15	3	499	56.1	9.14	40.46	146.8	134.8	137.6	147.3	143	136	58.6	63.2	56.5	55.3	61.1	59.6
A0A2I4EBH7	microsomal glutathione S-transferase 3-like OS=Juglans regia OX=51240 GN=LOC108988095 PE=4 SV=1	13	4	8	4	145	16.3	9.74	29.74	69	63.8	67.3	62.2	57.1	63.5	137.5	139.2	135.1	130.3	136.2	138.9
A0A2I4GRZ3	brefeldin A-inhibited guanine nucleotide-exchange protein 2 OS=Juglans regia OX=51240 GN=LOC109010322 PE=4 SV=1	4	7	12	1	1771	197.2	5.6	31.3	82.8	87	86.3	86.3	84.5	82.8	127.8	122.8	112.7	109.4	103.7	113.7
A0A2I4GCG0	ankyrin repeat domain-containing protein 2B OS=Juglans regia OX=51240 GN=LOC109006688 PE=4 SV=1	12	5	13	2	349	37.6	4.67	38.45	96.4	94.2	98.9	119.9	114.4	119	92.5	89.3	93.3	92.1	95.5	94.5
A0A2I4ESD2	Polyadenylate-binding protein OS=Juglans regia OX=51240 GN=LOC108992262 PE=3 SV=1	8	3	6	1	655	71.4	7.9	17.46	69.4	67.6	67.8	59.1	61.6	60.5	142.7	152.8	140.1	127.6	124.3	126.5
A0A2I4HRR9	S-(hydroxymethyl)glutathione dehydrogenase OS=Juglans regia OX=51240 GN=LOC109020766 PE=3 SV=1	21	4	8	2	380	40.7	7.34	27.39	60.9	58.7	70.8	56.8	65.9	41.2	131.7	138.3	111.8	164.2	137.8	162
A0A834CV57	Delta-1-pyrroline-5-carboxylate synthase OS=Juglans regia OX=51240 GN=F2P56_008402 PE=3 SV=1	7	5	12	2	734	79.2	6.93	36.95	153.5	150.9	151.9	148.9	132.5	137.9	49.2	47.9	51.6	60	57	58.4
A0A834CZA2	Vps53_N domain-containing protein (Fragment) OS=Juglans regia OX=51240 GN=F2P56_009018 PE=3 SV=1	11	7	7	7	896	100.2	8.28	22.07	88.1	91.2	94.1	118.2	106.1	113.3	96.7	97.4	97.9	96	100.5	100.5
A0A2I4FQJ3	protein FAM91A1 OS=Juglans regia OX=51240 GN=LOC109001195 PE=3 SV=1	10	8	11	8	1006	111.2	5.53	30.87	112.6	108.8	111.9	112.9	108	106.2	91.7	88.5	88.2	87.5	93.3	90.4
A0A2I4GSI0	40S ribosomal protein S16-like OS=Juglans regia OX=51240 GN=LOC109010459 PE=3 SV=1	36	5	15	5	144	16.5	10.11	46.81	115	114.3	115.4	103.5	112.6	114.2	72.9	74.3	74.5	102.1	98.7	102.6
A0A6P9EA24	probable ADP-ribosylation factor GTPase-activating protein AGD6 OS=Juglans regia OX=51240 GN=LOC108999014 PE=4 SV=1	15	7	14	7	458	49.5	8.06	31.1	119.2	113.2	115	169.6	171.6	164.6	54.6	55.4	60.1	60.4	59	57.1
A0A2I4GU53	putative DUF21 domain-containing protein At1g03270 OS=Juglans regia OX=51240 GN=LOC109010914 PE=4 SV=1	10	3	7	1	494	54.3	6.61	23.57	136	135	141.9	151.6	145	153.6	50.5	48.4	58.2	59.2	58.8	61.9
A0A2I4GDH8	Lactoylglutathione lyase OS=Juglans regia OX=51240 GN=LOC109006942 PE=3 SV=1	14	4	18	1	290	32.4	5.36	56.03	38	38.4	35.4	34.4	37.3	33.8	164.8	168.5	161.5	168.5	162.2	157.2
A0A2I4FZZ0	40S ribosomal protein S2-3-like OS=Juglans regia OX=51240 GN=LOC109003514 PE=3 SV=1	21	6	15	3	269	29.6	10.23	46.25	120.4	120.1	124.4	122.7	114.7	118	60.7	61.2	63	94.4	99.9	100.5
A0A833TJC8	Xyloglucan endotransglucosylase/hydrolase (Fragment) OS=Juglans regia OX=51240 GN=F2P56_029643 PE=3 SV=1	24	7	12	7	330	38.3	8.72	29.36	29.1	29.1	31.3	32.7	34.8	37.3	252.1	232.2	227.3	96.8	95.6	101.9
A0A2I4G615	uncharacterized protein LOC109005031 OS=Juglans regia OX=51240 GN=LOC109005031 PE=3 SV=1	10	3	7	1	317	35.1	4.88	27.21	60.4	63.5	67.9	60.6	65.3	64	139.1	133.2	134.9	137.1	135.8	138.1
A0A2I4GNU5	Beta-adaptin-like protein OS=Juglans regia OX=51240 GN=LOC109009524 PE=3 SV=1	9	6	8	6	843	92.9	5.44	26.18	74.8	81.5	79.6	80.7	85.2	82	123.5	125.1	122.2	111.3	116	118.1
A0A2I4F279	probable histone-arginine methyltransferase 1.3 OS=Juglans regia OX=51240 GN=LOC108994824 PE=4 SV=1	10	4	6	4	541	60.5	5.53	22.46	87.5	91.5	93.4	97.9	95.8	84.8	108.1	103.8	107.4	113.7	109.5	106.5
A0A2I4H2F0	Trafficking protein particle complex subunit OS=Juglans regia OX=51240 GN=LOC109012897 PE=3 SV=1	25	5	8	5	194	21.7	8	26.47	68.6	72.4	73.3	76.4	71.4	76.4	120.5	130.8	132.4	123.4	124.7	129.6
A0A2I4FU01	Acetyltransferase component of pyruvate dehydrogenase complex OS=Juglans regia OX=51240 GN=LOC109002018 PE=3 SV=1	12	5	10	5	547	60.1	8.13	30.15	108.9	108.9	114.7	124	120	122.4	82.7	75.6	78.8	86.9	89.3	87.7
A0A2I4EQQ7	Serine/threonine-protein phosphatase OS=Juglans regia OX=51240 GN=LOC108991802 PE=3 SV=1	22	7	12	3	316	35.9	5.74	40.94	92	87.8	90.5	99.5	102.2	96.7	99.7	101.6	98.7	108.4	111.9	110.9
A0A6P9EW74	Signal peptidase I OS=Juglans regia OX=51240 GN=LOC109015575 PE=3 SV=1	31	4	10	4	180	20	7.61	30.47	80.6	82.2	76.1	75.7	83.3	80.4	119.5	118.4	117.3	119.1	126.1	121.2
A0A2I4G660	Acyl-[acyl-carrier-protein] desaturase OS=Juglans regia OX=51240 GN=LOC109005061 PE=3 SV=1	22	8	11	6	396	45.2	6.92	30.3	130.7	131.6	132	121.7	127.7	130.2	87.1	81.5	82.5	61.5	58.1	55.6
A0A2I4HH53	protein TOC75-3, chloroplastic-like OS=Juglans regia OX=51240 GN=LOC109017747 PE=4 SV=1	11	7	8	7	801	87.7	8.29	25.23	80.8	73.9	76.3	84.1	77.5	80.4	116.1	115	106.8	133.7	127.2	128.2
A0A2I4EL78	NADH:ubiquinone reductase (non-electrogenic) OS=Juglans regia OX=51240 GN=LOC108990600 PE=3 SV=1	13	5	7	5	582	65.6	7.97	24.52	113.4	109	103.3	103.8	96.1	96.6	101.8	95.4	104.2	90.5	91.2	94.8
A0A2I4DPJ2	uncharacterized TPR repeat-containing protein At1g05150-like OS=Juglans regia OX=51240 GN=LOC108982213 PE=4 SV=1	9	8	10	2	797	89.5	6.44	26.74	53.8	54.3	56.9	51.8	52.9	57.2	178.9	174.8	174.6	105.1	116.1	123.6
A0A2I4H5J1	Carbonic anhydrase OS=Juglans regia OX=51240 GN=LOC109013692 PE=3 SV=1	13	2	4	1	257	28	6.77	21.75	165.1	151.1	162.7	191.9	194.6	194	21.9	21.7	23.7	23.3	25.6	24.6
A0A6P9DZB5	beta-glucosidase BoGH3B-like isoform X1 OS=Juglans regia OX=51240 GN=LOC109014152 PE=4 SV=1	6	4	10	1	703	77.3	8.03	31.75	36.8	42.3	45.2	36.8	39.2	38.1	191.1	195.9	163.8	176.3	119.2	115.5
A0A2I4EWL2	triosephosphate isomerase, chloroplastic OS=Juglans regia OX=51240 GN=LOC108993359 PE=3 SV=1	15	4	13	3	312	33.4	8.31	43.08	58.4	56.5	55	66.2	66.8	69.7	126.6	127.5	127.1	143.3	153.1	149.9
A0A2I4H094	V-type proton ATPase subunit H OS=Juglans regia OX=51240 GN=LOC109012401 PE=3 SV=1	13	5	9	5	452	51.7	6.73	29.22	101.6	104.1	101.2	103.4	103.9	102.9	108.9	99.6	103.9	90.4	88.9	91.1
A0A833X505	Uncharacterized protein (Fragment) OS=Juglans regia OX=51240 GN=F2P56_020312 PE=3 SV=1	26	6	17	3	214	24	9.47	52.86	123.7	124.8	116.7	112.1	115.4	116.3	77.2	80.2	78.1	84.5	85.5	85.6
A0A2I4H4T3	Sucrose-phosphatase OS=Juglans regia OX=51240 GN=LOC109013498 PE=3 SV=1	7	2	7	2	426	48.4	6.21	23.99	150.1	156.3	155.4	155.4	161.3	158.5	38.2	42.6	44.3	44.4	47.5	46.1
A0A2I4HD94	Elongation factor G, mitochondrial OS=Juglans regia OX=51240 GN=LOC109016143 PE=3 SV=1	10	7	7	7	757	84.1	6.6	23.55	145.3	142.7	145.3	148.6	152.9	150.3	48.5	49.7	53.5	55.1	55	53.1
A0A2I4DFT6	vacuolar-sorting receptor 3-like OS=Juglans regia OX=51240 GN=LOC108979735 PE=3 SV=1	12	7	12	6	629	69.7	5.53	24.99	109.7	112.8	108.6	116.7	118.3	118.7	83	81	86.9	87.6	89.5	87.2
A0A2I4G793	monodehydroascorbate reductase, seedling isozyme-like isoform X2 OS=Juglans regia OX=51240 GN=LOC109005337 PE=4 SV=1	10	5	14	2	431	47	6.1	34.52	117.2	108.1	124.6	107.7	109.9	114.2	73.9	88.4	92	82	92.1	90.1
A0A2I4HLX5	60S ribosomal protein L11 OS=Juglans regia OX=51240 GN=LOC109019293 PE=3 SV=1	21	4	21	4	182	20.8	9.99	59.74	107.1	107.2	102	101.6	102.3	101.2	86.7	90.2	88.8	104.5	106.2	102.1
A0A2I4E1Q6	Peptidyl-prolyl cis-trans isomerase OS=Juglans regia OX=51240 GN=LOC108985469 PE=3 SV=1	19	5	7	4	253	27.1	9.58	23.73	82.5	82.9	93.6	94.2	108.8	103.7	111.8	110	110.5	103.3	97	101.8
A0A2I4DVJ3	serine/threonine-protein kinase SAPK7-like OS=Juglans regia OX=51240 GN=LOC108983840 PE=3 SV=1	13	4	7	2	357	41.1	6.35	24.53	94.8	100.3	98	104.6	105.5	103.8	103.9	102.7	100.1	95.6	94.6	96.1
A0A2I4FTN3	25.3 kDa vesicle transport protein-like OS=Juglans regia OX=51240 GN=LOC109001951 PE=3 SV=1	23	4	6	4	218	25.5	9.01	23.62	106.8	110.7	107.5	138.4	135.5	130.6	80	79.6	84	72.5	75.8	78.6
A0A2I4FC36	Glyceraldehyde-3-phosphate dehydrogenase OS=Juglans regia OX=51240 GN=LOC108997409 PE=3 SV=1	23	8	10	6	403	43	8.27	22.82	47.1	44.6	47.2	54.1	49.6	49.1	152.5	155.7	151.4	145.1	151.8	152
A0A2I4GTE3	Succinate--CoA ligase [ADP-forming] subunit beta, mitochondrial OS=Juglans regia OX=51240 GN=LOC109010722 PE=3 SV=1	14	7	13	1	422	45.4	5.5	37.97	148.9	165.9	147.6	126.8	115	134	58.8	67.6	58.3	50.1	61.7	65.2
A0A2I4HEN0	COP9 signalosome complex subunit 7-like isoform X1 OS=Juglans regia OX=51240 GN=LOC109016602 PE=3 SV=1	25	4	7	4	256	29.1	5.44	25.07	75.9	78.7	79.7	95.3	92.2	95.4	115.9	112.8	113.2	105	115.5	120.3
A0A2I4F147	HECT-type E3 ubiquitin transferase OS=Juglans regia OX=51240 GN=LOC108994567 PE=4 SV=1	3	9	11	1	3785	414.2	5.07	25.17	92.8	107.2	99.3	107	112.2	97.5	87.7	95.1	105	91.6	97.3	107.4
A0A2I4HRL1	ras-related protein RABF2a OS=Juglans regia OX=51240 GN=LOC109020717 PE=4 SV=1	27	4	8	2	200	21.8	7.28	25.42	106.9	107.1	108	109.7	103.1	100.1	101	103.6	97.8	87	88.5	87.3
A0A2I4DQK6	mitochondrial dicarboxylate/tricarboxylate transporter DTC-like OS=Juglans regia OX=51240 GN=LOC108982493 PE=3 SV=1	18	5	12	5	299	31.8	9.38	42.87	102.2	103.7	101.5	93.2	96.5	97.6	102.3	96.9	101.1	99.3	104.6	101.2
A0A6P9EI91	Dolichyl-diphosphooligosaccharide--protein glycotransferase OS=Juglans regia OX=51240 GN=LOC108986604 PE=3 SV=1	12	6	9	6	626	69.9	9.29	29.26	126.4	125.8	131.6	114	111.9	116.7	84.8	73.9	85	74.3	76.7	78.7
A0A2I4GZ12	Transmembrane 9 superfamily member OS=Juglans regia OX=51240 GN=LOC109012097 PE=3 SV=1	9	5	17	5	591	67.8	7.09	57.41	110	112.2	109.8	97.1	97	99.4	95.3	100.7	100.5	88.9	96.4	92.9
A0A2I4G6Q5	Transmembrane 9 superfamily member OS=Juglans regia OX=51240 GN=LOC109005213 PE=3 SV=1	7	4	10	1	642	73.8	8.22	26.91	141.9	123.5	123.5	117.9	104.7	125	76.6	83.1	78	75.8	75.1	74.7
A0A2I4GD02	Serine--tRNA ligase OS=Juglans regia OX=51240 GN=LOC109006830 PE=4 SV=1	12	6	13	6	483	55.6	7.69	38.69	89.5	85.1	85.1	81.5	79.9	74.6	111.4	119	120.4	120.3	115.4	117.7
A0A2I4EQJ3	COP9 signalosome complex subunit 4 isoform X2 OS=Juglans regia OX=51240 GN=LOC108991739 PE=4 SV=1	17	5	9	5	397	44.9	5.33	23.96	89.3	93.3	89.9	94.4	89.9	90.3	105	116.8	113.4	104.2	107.5	106
A0A2I4FUW8	cullin-1-like OS=Juglans regia OX=51240 GN=LOC109002241 PE=3 SV=1	12	8	10	2	739	86.2	6.83	27.7	123.4	122.5	136.2	135.5	129.9	142.5	67.6	71	69.6	64.3	62.7	74.7
A0A2I4E7H3	5'-methylthioadenosine nucleosidase-like OS=Juglans regia OX=51240 GN=LOC108986981 PE=4 SV=1	15	2	7	2	261	27.8	4.84	23.66	73.9	69.6	67.8	69	68.4	67.5	130.4	131.9	129.2	128.2	131.2	133
A0A2I4GFE6	Neutral ceramidase OS=Juglans regia OX=51240 GN=LOC109007403 PE=3 SV=1	7	4	7	1	780	85.9	6.92	26.13	125.9	129.8	141.9	167.7	153.6	157	56.8	45.2	51.8	61.7	58.9	49.5
A0A2I4HS90	Calcium-transporting ATPase OS=Juglans regia OX=51240 GN=LOC109020940 PE=3 SV=1	8	7	12	1	1020	111.6	6.51	28.74	199.9	195.1	211.5	174.7	150	162.7	16.1	19.5	20.1	15.3	19.9	15.2
A0A833X103	Uncharacterized protein OS=Juglans regia OX=51240 GN=F2P56_025054 PE=4 SV=1	6	7	11	0	1212	130.8	7.85	30.23	124.5	152.6	161	111.7	131.1	106.5	84.1	59.2	74.6	89.4	59.6	45.7
A0A2I4GEJ9	nodal modulator 1 OS=Juglans regia OX=51240 GN=LOC109007201 PE=4 SV=2	5	5	9	5	1200	130.9	5.81	25.68	119.9	119.9	127.2	102.7	104.8	109.6	93	83.1	84.8	90.3	80.2	84.4
A0A2I4GC33	Beta-galactosidase OS=Juglans regia OX=51240 GN=LOC109006597 PE=3 SV=1	6	5	9	4	832	93.4	8.34	29.7	191.6	191.3	186.1	141	145.4	142.2	27.9	30.6	36	35.1	36	36.9
A0A2I4GBV0	Fructose-bisphosphate aldolase OS=Juglans regia OX=51240 GN=LOC109006536 PE=3 SV=2	10	5	10	4	397	42.9	8.25	28.44	55.4	61.6	66.2	49.5	46.7	50.1	166.8	150	142.4	158.8	126.4	126.1
A0A6P9E2K5	probable manganese-transporting ATPase PDR2 isoform X2 OS=Juglans regia OX=51240 GN=LOC109001201 PE=3 SV=1	10	11	14	5	1156	128.5	8.38	30.52	115.6	114.8	115.3	100.3	96.7	100.3	96.2	93.6	96.3	89.7	90.5	90.7
A0A833XHA2	Threonine synthase OS=Juglans regia OX=51240 GN=F2P56_016333 PE=3 SV=1	8	3	6	1	549	60.4	8.78	19.33	109.2	114.8	128.6	107.3	105.3	103.5	78.7	75.3	83.3	94.2	95.1	104.8
A0A2I4FH52	Assimilatory sulfite reductase (ferredoxin) OS=Juglans regia OX=51240 GN=LOC108998735 PE=3 SV=1	13	8	9	2	687	77.6	9.04	22.57	99.7	103.1	103.3	96.6	103.8	104.6	94.4	95.9	93.1	100.3	103.2	102
A0A2I4GLX7	Aldehyde dehydrogenase (NAD(+)) OS=Juglans regia OX=51240 GN=LOC109009030 PE=3 SV=1	8	3	9	3	509	54.6	5.87	24.14	85	86.1	85.5	67.1	75.6	74.7	124.8	127.1	121.5	124	116.5	112.3
A0A2I4DKZ8	L-galactono-1,4-lactone dehydrogenase, mitochondrial-like OS=Juglans regia OX=51240 GN=LOC108981186 PE=4 SV=2	9	7	11	7	601	68	8.32	33.76	88.3	91.8	93.6	90.3	88.7	87.4	116.9	116.8	107	107.5	107.1	104.7
A0A2I4DGH4	40S ribosomal protein S17-3-like OS=Juglans regia OX=51240 GN=LOC108979914 PE=3 SV=1	22	5	10	5	144	16.2	9.94	32.56	145	139.7	139.3	147.4	148.3	150.2	37.8	37.9	42.3	69.1	72.4	70.6
A0A2I4E697	Phenylalanine--tRNA ligase OS=Juglans regia OX=51240 GN=LOC108986685 PE=3 SV=1	9	5	13	5	602	67.1	5.22	29.92	92.9	95.5	95.2	100.6	99.8	100.7	104.5	96.6	96.6	105.7	105.8	106.1
A0A2I4F2E9	protein DNA-DAMAGE INDUCIBLE 1 isoform X1 OS=Juglans regia OX=51240 GN=LOC108994885 PE=3 SV=1	20	7	10	7	411	45	5.11	31.23	108.2	114.2	109.7	113.1	111.7	120.6	92.7	89.4	90	83.3	83.5	83.4
A0A2I4EKZ9	SKP1-like protein OS=Juglans regia OX=51240 GN=LOC109015676 PE=3 SV=1	26	2	6	2	155	17.7	4.65	28.5	78.9	81.1	83.1	98.4	90.3	97.8	106.5	109.1	103.4	113.8	117.5	120.1
A0A2I4E4Y0	heat shock cognate 70 kDa protein-like OS=Juglans regia OX=51240 GN=LOC108986328 PE=3 SV=1	6	2	17	1	644	71.5	6.2	59.13	93.5	93.2	93.3	86.8	87.4	88.1	100.3	102.7	101.4	117.9	117.7	117.7
A0A2I4DK24	MA3 DOMAIN-CONTAINING TRANSLATION REGULATORY FACTOR 1-like OS=Juglans regia OX=51240 GN=LOC108980899 PE=3 SV=1	9	7	15	1	709	78	5.25	35.54	94.8	92.8	96.1	109.6	97.1	103	100.1	99.7	104	99.1	105.1	98.5
A0A2I4DVW9	ABC transporter G family member 11-like OS=Juglans regia OX=51240 GN=LOC108983950 PE=4 SV=1	11	5	6	5	707	79	8.21	17.18	30.4	27.2	26.9	29.5	28.1	30.7	255	258.8	248.9	89.5	81.7	93.2
A0A2I4H141	Protein transport protein SEC23 OS=Juglans regia OX=51240 GN=LOC109012619 PE=3 SV=2	7	3	6	2	763	84.3	6.24	22.88	114.5	108.4	114.8	120.6	117.4	114.9	83.4	73.2	92.3	86.8	87.2	86.4
A0A6P9ETN8	Valine--tRNA ligase OS=Juglans regia OX=51240 GN=LOC108981981 PE=3 SV=1	7	9	12	9	1115	127.1	6.84	28.3	106	106	99.9	95.3	93.8	95.2	100.9	101.2	99.2	101.6	100.9	100
A0A2I4GVF4	serine-threonine kinase receptor-associated protein-like OS=Juglans regia OX=51240 GN=LOC109011221 PE=4 SV=2	13	3	6	3	351	38.2	5.54	19.53	116.7	104.7	115.9	125.1	117.6	119.6	76	79.5	76.7	88	88.2	92
A0A2I4GX76	Threonine--tRNA ligase OS=Juglans regia OX=51240 GN=LOC109011668 PE=3 SV=1	10	9	12	9	721	82.7	7.21	31.11	93.1	93.7	96.1	94	92.1	94.4	106.1	106.3	103.2	107	106.2	107.8
A0A833UZI0	Uncharacterized protein (Fragment) OS=Juglans regia OX=51240 GN=F2P56_020920 PE=3 SV=1	18	4	10	4	231	24.7	9.52	30.23	85.1	83.4	90.4	97	101.8	98.5	108	104.5	102.4	111	111.1	106.7
A0A2I4G1Z9	alpha,alpha-trehalose-phosphate synthase [UDP-forming] 6 OS=Juglans regia OX=51240 GN=LOC109004002 PE=3 SV=1	11	7	7	5	854	96.8	6.1	17.31	62	64.4	63.2	64.6	62.6	62.9	131.6	143.7	129.3	137.5	137.1	141.1
A0A2I4FP20	serine/threonine protein phosphatase 2A regulatory subunit B''beta-like isoform X2 OS=Juglans regia OX=51240 GN=LOC109000817 PE=4 SV=2	14	7	8	7	527	60.8	4.98	27.25	110.5	109.7	113.4	107.6	104.6	103.1	93	91.5	93.7	91.5	91.5	89.9
A0A2I4HMR9	protein transport protein Sec24-like At3g07100 OS=Juglans regia OX=51240 GN=LOC109019549 PE=3 SV=1	7	7	10	7	1029	113.8	7.56	27.14	93	94	96.7	90.8	89.5	81.6	110.4	113.1	111.8	106.1	105.3	107.7
A0A2I4HLT4	ras-related protein Rab11D OS=Juglans regia OX=51240 GN=LOC109019310 PE=4 SV=1	24	5	13	1	217	24.3	6.93	34.16	58.1	51.3	54.1	59.9	57.6	57.2	160.2	153.8	145.2	138.6	123.5	140.4
A0A833U027	PRK domain-containing protein OS=Juglans regia OX=51240 GN=F2P56_029886 PE=4 SV=1	18	9	12	4	600	67.5	8.53	31.91	110.6	110.6	111.8	119	115	111.9	98.4	91.3	92.7	79.9	79.1	79.7
A0A2I4EKP2	Malate dehydrogenase OS=Juglans regia OX=51240 GN=LOC108990441 PE=3 SV=2	15	5	11	4	356	37.4	8.22	32.34	107.8	101.6	97.7	104.5	106.5	105.6	92.5	98.6	93.5	101.3	96	94.5
A0A833Y2K1	Neutral ceramidase OS=Juglans regia OX=51240 GN=F2P56_007936 PE=3 SV=1	8	5	10	1	696	77	6.95	30.29	88.8	88.9	80.4	92.8	96.7	91.6	107.7	99.5	112.8	119.7	119.8	101.3
A0A2I4E7J1	NADP-dependent D-sorbitol-6-phosphate dehydrogenase-like OS=Juglans regia OX=51240 GN=LOC108986997 PE=4 SV=2	21	7	9	7	309	34.8	6.39	27.73	75.9	74.8	73.5	80.7	83.8	82.8	129.1	130.5	124.8	115.2	114.1	114.7
A0A2I4GQQ2	26S proteasome non-ATPase regulatory subunit 12 homolog A OS=Juglans regia OX=51240 GN=LOC109009985 PE=3 SV=1	18	8	17	8	442	50.6	6.67	37.92	91	89.4	95.2	92.9	93.1	91.9	111	109.8	108.3	105.9	106.5	104.9
A0A2I4F5F5	Inorganic diphosphatase OS=Juglans regia OX=51240 GN=LOC108995721 PE=3 SV=1	27	7	11	5	295	33	6.93	29.67	78.3	88.2	83.1	96.6	91.3	93.6	104.8	106.7	101.6	116.8	122.7	116.1
A0A2I4DR99	BAHD acyltransferase DCR OS=Juglans regia OX=51240 GN=LOC108982684 PE=4 SV=1	6	2	12	2	452	50.3	5.67	34.31	21.2	21.8	22.8	23.6	25.6	25.4	244.5	237.5	223.3	118.4	115.7	120.2
A0A2I4GCR6	Eukaryotic translation initiation factor 3 subunit A OS=Juglans regia OX=51240 GN=LOC109006781 PE=3 SV=1	6	7	9	4	978	114.2	8.95	25.03	118.9	117.4	122.8	114	109.7	115.6	81.8	82.1	85.1	85.3	82.5	84.8
A0A2I4EL92	DNA-directed RNA polymerase subunit beta OS=Juglans regia OX=51240 GN=LOC108990620 PE=3 SV=1	9	10	11	10	1192	135.2	7.72	30.21	74	72.3	79.1	80.5	81.9	82	112.6	116.5	111.6	129.5	132.3	127.7
A0A2I4F3Z8	aminopeptidase P1 OS=Juglans regia OX=51240 GN=LOC108995303 PE=3 SV=1	4	1	5	1	659	73.4	5.35	23.45	79.6	114	93.9	91.1	96.6	96.1	103.5	101.9	100	109.8	110.3	103.2
A0A2I4DS06	DExH-box ATP-dependent RNA helicase DExH14 OS=Juglans regia OX=51240 GN=LOC108982901 PE=4 SV=1	5	10	11	9	2090	236.8	6.43	22.67	108.3	109.8	111.6	98	99.3	98	101.1	99.1	90.4	97.1	94	93.1
A0A6P9E4T1	DNA-directed RNA polymerase subunit OS=Juglans regia OX=51240 GN=LOC109016614 PE=3 SV=1	5	8	8	8	1847	206.4	6.04	23.31	75.3	77.3	83.4	74.4	71.5	80.4	107.4	112.2	112.5	131.5	139.8	134.4
A0A2I4HMU2	Mannose-1-phosphate guanylyltransferase OS=Juglans regia OX=51240 GN=LOC109019608 PE=4 SV=1	16	4	7	1	361	39.4	7.74	18.57	128.8	127.8	139.1	116.4	96	103.6	91.7	89.5	94.8	62.8	70	79.5
A0A2I4FV41	UDP-glucose:glycoprotein glucosyltransferase OS=Juglans regia OX=51240 GN=LOC109002294 PE=3 SV=1	5	7	11	7	1635	184.8	6.32	26.29	94.1	99.1	95.4	91.8	95.3	95.6	109	107.8	104.1	105.1	102	100.7
A0A833XJY9	Carboxypeptidase OS=Juglans regia OX=51240 GN=F2P56_016922 PE=3 SV=1	6	3	6	3	515	57.5	5.38	19.34	72.7	74.2	74	106.9	98.8	99	100.3	102.5	101.8	122.2	120.9	126.7
A0A2I4GCJ1	calcium-dependent protein kinase 26 OS=Juglans regia OX=51240 GN=LOC109006664 PE=4 SV=1	10	5	9	1	562	62.9	5.87	24.19	103.9	95.6	109.3	98.2	94.5	101.2	93.2	92.8	104.7	96	104.6	106.1
A0A2I4E1H9	HECT-type E3 ubiquitin transferase OS=Juglans regia OX=51240 GN=LOC108985410 PE=4 SV=1	3	9	11	1	3779	413.8	5.11	21.64	97.2	93.8	97.7	100	99.3	98.2	105.6	101	98	100.7	104.5	104.1
A0A833YA62	Nucleoside diphosphate kinase (Fragment) OS=Juglans regia OX=51240 GN=F2P56_004682 PE=3 SV=1	15	5	14	5	285	31.3	9.35	40.64	153.5	154.3	157.2	154.9	161.6	160.5	41.5	44.5	49.5	42	39.4	41
A0A2I4DM23	Amine oxidase OS=Juglans regia OX=51240 GN=LOC108981457 PE=3 SV=1	8	5	11	1	805	89.4	6.68	30.15	98.3	103.9	88.3	79.9	90.1	76.6	110.2	114.2	99.1	140.1	106.4	92.8
A0A2I4EI67	hypersensitive-induced response protein-like protein 1 OS=Juglans regia OX=51240 GN=LOC108989798 PE=4 SV=1	17	5	13	1	286	31.5	5.76	35.58	27.6	16.9	23	23.2	29.3	22.3	219.8	197.1	193.6	145.3	154.9	146.7
A0A2I4FAQ2	60S ribosomal protein L24-like OS=Juglans regia OX=51240 GN=LOC108997078 PE=3 SV=1	24	4	9	4	164	18.5	10.65	31.97	173.8	168.3	166.1	151.1	148.8	153.1	22.3	23.8	32	54.7	52.4	53.7
A0A833X7W2	Uncharacterized protein (Fragment) OS=Juglans regia OX=51240 GN=F2P56_032529 PE=3 SV=1	15	4	21	3	292	31.5	6.54	68.51	98.2	99.9	94.1	90.5	98.2	98.5	100.8	102.2	101	104.8	104.4	107.3
A0A2I4EKE1	Polyadenylate-binding protein OS=Juglans regia OX=51240 GN=LOC108990379 PE=3 SV=1	10	4	7	3	651	71.3	8.03	22.2	106	111.4	112.5	105.8	109.8	107.2	91.6	96.2	93.5	92.1	83.2	90.7
A0A2I4GQV8	Mannose-1-phosphate guanylyltransferase OS=Juglans regia OX=51240 GN=LOC109010025 PE=4 SV=1	19	5	8	2	361	39.5	7.46	16.2	87.4	85.9	88.4	83.2	78.8	81.6	117.2	109.7	112.7	120.3	114.7	119.9
A0A2I4E5X5	elongation factor 1-delta-like OS=Juglans regia OX=51240 GN=LOC108986587 PE=3 SV=1	12	3	12	3	232	25.3	4.56	27.08	95.2	97.7	97.4	103.7	98.4	103.4	97	98.9	99.3	102.4	101.7	104.8
A0A2I4G0V9	golgin candidate 5 isoform X2 OS=Juglans regia OX=51240 GN=LOC109003716 PE=4 SV=2	7	9	11	2	989	111	4.89	30.64	112	110.7	111.1	123.8	118.5	118.6	98	95.3	99.5	71.1	69	72.3
A0A833TX17	Uncharacterized protein OS=Juglans regia OX=51240 GN=F2P56_028833 PE=3 SV=1	16	3	8	1	237	26.8	9.23	30.49	84.6	90.4	85.9	88.1	84.1	86.3	110.3	110.7	111.8	119	115.5	113.3
A0A2I4HHA7	Eukaryotic translation initiation factor 3 subunit G OS=Juglans regia OX=51240 GN=LOC109017816 PE=3 SV=2	9	3	6	3	394	42.8	8.15	19.56	107	105.2	112.4	136.8	134.3	140.9	73.6	78.1	81.1	74	75.7	80.9
A0A2I4G230	acyl-CoA-binding protein isoform X2 OS=Juglans regia OX=51240 GN=LOC109004014 PE=3 SV=1	35	4	20	4	84	9.6	7.4	43.86	85.6	81.5	80.4	122.4	124.8	126.6	96.5	104.9	100.9	92.6	91.1	92.8
A0A2I4FRX0	ras-related protein RABA4c OS=Juglans regia OX=51240 GN=LOC109001517 PE=4 SV=1	22	5	10	1	223	24.8	7.37	29.52	130.7	135.3	144.8	144.3	136.5	142	71.7	61.6	68.3	45.8	58.3	60.7
A0A2I4FXN4	Dolichol-phosphate mannosyltransferase subunit 1 OS=Juglans regia OX=51240 GN=LOC109002931 PE=3 SV=1	19	3	5	3	238	26.7	9.09	18.38	100.1	101	106.7	106.7	102.4	100.4	97.3	97.7	100.5	92.6	97.8	96.9
A0A833U757	Uncharacterized protein (Fragment) OS=Juglans regia OX=51240 GN=F2P56_022107 PE=4 SV=1	7	3	13	3	294	34	8.98	37.81	101.5	102.3	107.2	117.9	116.1	116.9	87.5	91.1	91.7	89.2	88.6	90
A0A833WSJ1	Aldedh domain-containing protein (Fragment) OS=Juglans regia OX=51240 GN=F2P56_035749 PE=3 SV=1	11	7	15	1	542	58.5	6.99	41.43	59.6	59.3	56.1	59.6	59.6	56.9	131.7	137.8	129.8	150.5	150.8	148.2
A0A2I4EYA1	UDP-glucose 4-epimerase OS=Juglans regia OX=51240 GN=LOC108993800 PE=3 SV=1	17	5	9	4	347	38	6.65	32.93	107.5	104.7	102.6	117.1	117.6	111.5	81.1	81.5	79.6	96.8	100.6	99.4
A0A2I4HN96	Prohibitin OS=Juglans regia OX=51240 GN=LOC108982238 PE=3 SV=1	27	5	9	5	278	30.3	7.5	27.23	96.2	99.6	96.4	109.8	109.5	110.4	91.9	92.6	97.2	97.1	100.9	98.5
A0A2I4FRD3	bifunctional aspartokinase/homoserine dehydrogenase 1, chloroplastic-like OS=Juglans regia OX=51240 GN=LOC109001407 PE=3 SV=2	9	9	14	2	914	100.3	6.79	30.87	72.3	81.7	71.3	69	74.2	63.7	128.5	118.6	131.1	121.6	127	141.1
A0A2I4DIY3	putative clathrin assembly protein At2g01600 isoform X1 OS=Juglans regia OX=51240 GN=LOC108980589 PE=4 SV=2	14	7	10	7	567	62.6	5.3	27.66	69.9	66.2	65.4	68.6	67.1	65.5	147.2	147.3	149.9	119	116.9	117.1
A0A6P9E4Y5	pentatricopeptide repeat-containing protein At1g26460, mitochondrial-like isoform X1 OS=Juglans regia OX=51240 GN=LOC109021632 PE=4 SV=1	6	3	3	3	625	70.4	7.24	15.06	109	109.4	112.7	139.6	133.3	133.4	73.1	72.1	79.1	78.5	77.6	82.1
A0A2I4DU00	uncharacterized protein LOC108983448 OS=Juglans regia OX=51240 GN=LOC108983448 PE=4 SV=2	11	3	6	3	450	49.6	5.54	20.41	100.1	93.3	93.8	125.1	120.3	119	89.1	89.8	90.2	88.4	92.5	98.4
A0A6P9EP77	peroxisomal fatty acid beta-oxidation multifunctional protein AIM1-like OS=Juglans regia OX=51240 GN=LOC108997856 PE=3 SV=1	8	5	9	1	724	78.3	9.2	24.02	105.3	106.5	99.6	101.7	88.9	71.4	99.6	107.1	120	76.2	101.2	122.5
A0A6P9EPK4	eukaryotic translation initiation factor 5-like OS=Juglans regia OX=51240 GN=LOC109002228 PE=3 SV=1	13	6	8	4	445	49	6.61	22.82	127.6	130.3	125.9	180.8	174.4	170.3	42.9	42.6	47.9	52.4	51.8	53.2
A0A2I4FAC0	Coatomer subunit epsilon OS=Juglans regia OX=51240 GN=LOC108996987 PE=3 SV=2	15	4	12	4	290	32.3	5.35	33.83	102.4	101.9	101.9	100.9	105.4	106.5	106.9	109.3	113.8	80.6	83.2	87.1
A0A834D1J1	M20_dimer domain-containing protein OS=Juglans regia OX=51240 GN=F2P56_004376 PE=4 SV=1	15	4	10	4	395	43.3	5.73	29.74	90.9	90.8	88	93.4	93.3	92.8	102.8	108.3	108.3	110.8	113.8	106.9
A0A2I4GVC2	cyclase-associated protein 1-like OS=Juglans regia OX=51240 GN=LOC109011191 PE=3 SV=1	10	8	12	8	470	50.5	6.93	33.18	123.4	125	125.8	115.9	118	120.1	78	79.3	79.1	77.1	80	78.3
A0A2I4DE38	delta(24)-sterol reductase OS=Juglans regia OX=51240 GN=LOC108979238 PE=4 SV=1	13	7	9	7	563	65.5	8.18	26.23	101.4	103.9	102.6	113.9	111.7	108.1	77.4	76.3	79.8	111.1	108.2	105.7
A0A833Y9N3	Tripeptidyl-peptidase II (Fragment) OS=Juglans regia OX=51240 GN=F2P56_001170 PE=3 SV=1	4	6	9	2	1369	151.4	6.34	29.91	67.5	72.8	74.1	70.9	75.2	78.2	123.7	128.5	128	132.3	125.1	123.8
A0A2I4G639	Mitogen-activated protein kinase OS=Juglans regia OX=51240 GN=LOC109005059 PE=3 SV=1	16	5	11	1	390	44.6	5.55	33.13	83.4	73	83.2	54.1	61.7	65.4	144.7	160.8	118	123.6	117.1	115
A0A833XAD7	Ubiquitin-like modifier-activating enzyme 5 OS=Juglans regia OX=51240 GN=F2P56_019958 PE=3 SV=1	11	4	5	4	476	52.6	5.12	19.39	96.2	92.3	96.2	102	99.5	103.6	105	98	105.5	95.7	97.1	108.9
A0A2I4EEQ7	uncharacterized protein At5g49945-like OS=Juglans regia OX=51240 GN=LOC108988925 PE=4 SV=1	6	2	5	1	483	54	6.87	19.45	105.9	106.9	106.5	115.7	117.2	113.9	94.7	93.3	91	90.9	79.1	84.9
A0A2I4ETR6	rRNA 2'-O-methyltransferase fibrillarin 2-like OS=Juglans regia OX=51240 GN=LOC108992647 PE=3 SV=1	18	5	9	5	311	33	10.23	27.05	98.1	107.5	118	90.4	91.5	96.9	95.3	88.9	83.4	124.9	107.4	97.8
A0A2I4DJQ0	Hexosyltransferase OS=Juglans regia OX=51240 GN=LOC108980824 PE=3 SV=1	10	7	11	7	598	69.1	9.58	23.47	139.9	136.2	131.9	139.1	137	136.7	69.7	64.3	68.2	58.4	58.1	60.5
A0A2I4ECL0	probable N-succinyldiaminopimelate aminotransferase DapC isoform X1 OS=Juglans regia OX=51240 GN=LOC108988346 PE=4 SV=1	11	4	7	1	485	53.7	6.73	25.81	58.6	51.9	59	58.5	51.1	51.6	150	140.8	151.6	133.3	150.5	143
A0A2I4EJG0	Protein disulfide-isomerase OS=Juglans regia OX=51240 GN=LOC108990116 PE=3 SV=1	9	5	10	2	569	63.6	4.72	36.05	116	124.4	120.2	107.7	107.9	112.5	84.7	80.8	93.1	86.6	85.1	81.1
A0A6P9DXH1	aldehyde dehydrogenase family 2 member B7, mitochondrial-like isoform X5 OS=Juglans regia OX=51240 GN=LOC108985444 PE=3 SV=1	10	6	14	1	542	59.3	7.33	39.78	33.6	27.4	22.9	29.7	30.7	28.9	154.3	162	156.1	181.2	185.7	187.5
A0A833UV02	Uncharacterized protein OS=Juglans regia OX=51240 GN=F2P56_020947 PE=4 SV=1	15	3	5	3	310	34.2	7.36	18.02	90.6	87.2	87.4	101	102.1	97.2	107.8	106.9	89.4	95.8	120.3	114.3
A0A2I4F634	vesicle-associated membrane protein 722 OS=Juglans regia OX=51240 GN=LOC108995895 PE=3 SV=1	23	6	10	2	219	24.7	8.75	22.6	80.7	77.9	78.8	113.3	113.9	114.3	102.9	109.8	107.4	101.8	98.1	101.3
A0A2I4FBV9	calcium-dependent protein kinase 26 OS=Juglans regia OX=51240 GN=LOC108997367 PE=4 SV=1	13	6	10	2	565	63.3	5.67	23.39	116.7	117.3	122.9	100.3	97.5	99.5	88.1	93.9	93.7	84.3	92.8	93
A0A6P9DVK5	Tubulin gamma chain OS=Juglans regia OX=51240 GN=LOC108998371 PE=3 SV=1	20	8	10	2	474	53.2	5.85	26.72	72.8	78.9	75.5	78.3	77.1	71.4	140.1	130.2	131.4	112.7	114.5	117.2
A0A2I4G5J8	protein transport protein SEC13 homolog B-like OS=Juglans regia OX=51240 GN=LOC109004902 PE=3 SV=2	13	4	10	1	301	32.7	5.86	33.1	106.7	113.7	98	97.6	108.3	105.4	95.9	105.4	98.1	96.7	92.5	81.8
A0A6P9DV77	S-(hydroxymethyl)glutathione dehydrogenase OS=Juglans regia OX=51240 GN=LOC109020545 PE=3 SV=1	18	4	11	2	379	40.7	7.05	31.32	58.4	58.8	57	53.1	49.9	49.6	138.7	142.6	137	148.3	154.8	151.8
A0A2I4G8V0	V-type proton ATPase subunit a OS=Juglans regia OX=51240 GN=LOC109005733 PE=3 SV=1	8	7	13	2	818	93	6.21	35.14	76.6	80.3	72.8	70.2	73.1	73.3	126.4	127.1	128.4	128.6	121.5	121.7
A0A2I4FQE3	DEAD-box ATP-dependent RNA helicase 40 isoform X2 OS=Juglans regia OX=51240 GN=LOC109001168 PE=4 SV=1	5	5	9	4	1168	127.6	9.79	21.95	100.8	106.2	113	102.8	92.7	106.4	98.2	90.3	90.5	98	101.3	99.9
A0A6P9ESY3	bifunctional aspartokinase/homoserine dehydrogenase 1, chloroplastic-like OS=Juglans regia OX=51240 GN=LOC108998779 PE=3 SV=1	8	9	16	2	915	100.3	7.25	32.59	107.7	109.1	103.8	89.8	91.9	89.7	101.2	103.3	98	104.6	100.6	100.4
A0A833UD37	Serine/threonine-protein phosphatase OS=Juglans regia OX=51240 GN=F2P56_024736 PE=3 SV=1	7	5	7	2	885	96.7	6.24	25.26	56.7	58.6	43.5	46.3	52.4	47.9	163.5	144.2	143.1	164	143.3	136.4
A0A2I4GZB9	sorting nexin 1-like isoform X1 OS=Juglans regia OX=51240 GN=LOC109012189 PE=4 SV=1	16	5	8	5	401	46.1	8.16	19.8	84	86	85.6	96	89	93.4	110	107.3	113.2	108.3	111.4	115.6
A0A833WLV8	Phosphotransferase OS=Juglans regia OX=51240 GN=F2P56_025323 PE=3 SV=1	15	5	6	4	433	46.6	5.12	20.07	94.6	93.6	102.9	75.8	78.2	84.5	104.3	106.1	103.6	116.3	123.4	116.7
A0A2I4GNB3	K(+) efflux antiporter 2, chloroplastic-like OS=Juglans regia OX=51240 GN=LOC109009387 PE=4 SV=2	5	5	6	5	1214	130.6	5.2	18.96	93.8	91.9	98.5	93.2	91.9	93.9	110	108.9	105.3	102.6	103.5	106.5
A0A6P9ENT0	Neutral ceramidase OS=Juglans regia OX=51240 GN=LOC109000811 PE=3 SV=1	7	5	9	1	785	86.5	8.18	28.3	124	122.6	117.3	129.9	132.8	127.4	75.7	70.8	75.6	77.8	74.3	71.8
A0A2I4EGG8	erlin-2-B OS=Juglans regia OX=51240 GN=LOC108989372 PE=3 SV=1	18	8	13	8	369	42.1	6.21	29.39	92.3	93.7	95	94.2	92.2	94.4	111.4	109.8	108.7	105.6	101.8	100.7
A0A2I4DYM1	hsp70-Hsp90 organizing protein 3-like OS=Juglans regia OX=51240 GN=LOC108984669 PE=4 SV=1	11	8	14	2	592	66.3	6.64	32.13	112.8	112.2	111	118.7	116.2	118.8	84.3	87.7	90.1	83.5	82.3	82.6
A0A6P9E0H4	60S acidic ribosomal protein P0 OS=Juglans regia OX=51240 GN=LOC109009837 PE=3 SV=1	8	3	13	1	321	34.4	6.06	33.53	113.2	129.5	106	108.6	89.9	92.4	95.7	87.8	93.1	97.4	89.2	97.2
A0A833TTC6	Uncharacterized protein OS=Juglans regia OX=51240 GN=F2P56_024908 PE=3 SV=1	10	7	10	4	820	90.1	8.43	27.51	157.4	157.7	158.7	160.5	151.2	152	39.2	39.5	48.2	45.5	45.5	44.6
A0A2I4GN53	isovaleryl-CoA dehydrogenase, mitochondrial OS=Juglans regia OX=51240 GN=LOC109009331 PE=3 SV=1	8	3	8	3	408	44.6	8.02	25.48	83	79.3	80.8	88.8	88.4	86	112.5	107.6	107.6	121.4	121.3	123.4
A0A834CRQ8	UDENN domain-containing protein OS=Juglans regia OX=51240 GN=F2P56_013104 PE=4 SV=1	6	6	8	4	1234	136.5	5.87	21.93	93.9	90.1	95.4	103	98.1	99.1	106.4	104.7	108.6	100.2	100.7	99.9
A0A2I4E4A8	V-type proton ATPase subunit D-like OS=Juglans regia OX=51240 GN=LOC108986170 PE=3 SV=1	23	8	11	8	261	29.2	9.64	32.97	96.7	96.9	98.2	100.1	105	100.8	108.2	111.9	108.1	93.6	90.6	89.9
A0A2I4GBX1	V-type proton ATPase proteolipid subunit OS=Juglans regia OX=51240 GN=LOC109006542 PE=3 SV=1	11	1	16	1	164	16.5	8.46	30.6	95.7	94.4	94.3	93.6	91	92.6	109.7	101.9	104.5	105.5	110	106.8
A0A2I4FDU0	UDP-arabinopyranose mutase OS=Juglans regia OX=51240 GN=LOC108997873 PE=3 SV=1	8	3	14	2	351	39.1	5.48	39.79	129.7	130.5	125.2	121.3	121.4	121.4	80.2	73.6	73.4	74.3	77.5	71.5
A0A2I4HPB0	phosphomethylethanolamine N-methyltransferase OS=Juglans regia OX=51240 GN=LOC109020045 PE=4 SV=1	11	7	9	4	491	55.9	5.36	20.39	176.7	189	181.7	156.4	154	163.1	20.7	25.1	30.1	35.7	33.4	34
A0A6P9F022	Mitochondrial proton/calcium exchanger protein OS=Juglans regia OX=51240 GN=LOC109013648 PE=3 SV=1	8	5	6	1	762	86.4	5.99	21.02	127.7	123.8	123.7	134.8	127.5	128.8	73	75.4	79.7	67	71.1	67.5
A0A2I4E9F3	Exocyst subunit Exo70 family protein OS=Juglans regia OX=51240 GN=LOC108987561 PE=3 SV=2	11	6	9	4	649	73.5	7.66	23.48	93.5	90.6	90.6	105.5	100.9	98.2	110.8	109.8	108.7	93.8	100	97.7
A0A2I4HLF7	golgin candidate 5-like OS=Juglans regia OX=51240 GN=LOC109019206 PE=4 SV=1	6	8	11	1	1020	114.4	4.88	29.91	102	101.1	102.8	105.6	110.3	100	103.8	98.9	102.2	92.3	86.9	94.1
A0A833UD40	Hexosyltransferase OS=Juglans regia OX=51240 GN=F2P56_028251 PE=3 SV=1	8	6	11	1	686	78.2	9.28	28	138.2	148.9	163.9	137.3	125.8	128.9	56.8	60.2	54.1	54	69.4	62.4
A0A6P9F3K8	gamma aminobutyrate transaminase 3, chloroplastic isoform X1 OS=Juglans regia OX=51240 GN=LOC109010285 PE=4 SV=1	13	2	8	2	193	21.2	7.39	27.77	78.5	77	75.3	84.1	83	83.6	124.1	120.4	124.7	114.8	117.7	116.8
A0A2I4HNX1	ATP citrate synthase OS=Juglans regia OX=51240 GN=LOC109019920 PE=3 SV=1	9	4	14	2	423	46.7	6.71	35.39	102.3	106	100.5	91	99.5	99.4	96.3	91.5	91.3	107.9	105.4	109
A0A2I4GC34	synaptotagmin-1-like OS=Juglans regia OX=51240 GN=LOC109006593 PE=3 SV=1	8	5	11	2	542	61.9	7.59	29.25	92.2	92.3	90.4	81.6	93.5	85.9	110.4	117	112.2	104.9	102.3	117.5
A0A2I4FBQ1	probable beta-1,4-xylosyltransferase IRX10 OS=Juglans regia OX=51240 GN=LOC108997329 PE=3 SV=1	18	6	10	6	413	47.2	7.03	31.26	28.1	29.5	31.1	31.7	32.1	32	177.4	174.1	164.1	164.3	170.5	165
A0A2I4FB29	alpha-dioxygenase 1-like OS=Juglans regia OX=51240 GN=LOC108997157 PE=4 SV=1	6	4	7	3	644	73.8	6.81	24.41	17	15.2	18.5	18.2	17.3	19.2	224.7	226.5	224.7	139.8	137.3	141.8
A0A2I4F2H9	AMP deaminase OS=Juglans regia OX=51240 GN=LOC108994905 PE=3 SV=2	8	7	8	6	840	95.7	7.01	26.54	71.5	77.1	76	72.6	73	72.8	129.3	125.8	128.7	123.7	126.5	122.9
A0A2I4GAJ6	probable inactive receptor kinase At1g48480 OS=Juglans regia OX=51240 GN=LOC109006189 PE=4 SV=1	7	4	10	3	651	70.5	6.64	28.54	26.2	28.3	28.9	32.3	32.4	33.9	231	232.2	221	109.7	113.3	111
A0A2I4DVP5	eukaryotic translation initiation factor 2 subunit alpha homolog OS=Juglans regia OX=51240 GN=LOC108983888 PE=3 SV=1	23	8	14	8	344	38.9	5.27	37.44	97.1	96.8	96.2	102.5	104.3	102.5	97.7	100.8	95.6	103.1	104.4	99
A0A2I4H8A0	Pyruvate kinase OS=Juglans regia OX=51240 GN=LOC109014376 PE=3 SV=1	11	6	17	2	508	55	6.73	35.29	108.9	109.2	103.2	99.1	96.1	98.4	98.4	93.6	98.6	99.8	100.4	94.3
A0A2I4FSJ2	1,3-beta-glucan synthase OS=Juglans regia OX=51240 GN=LOC109001689 PE=3 SV=1	4	7	12	3	1907	219	8.1	25.16	102.7	86.5	85.6	89.4	89.3	81.1	117.7	119.7	128.7	99.8	104	95.6
A0A833XKN9	Peroxidase (Fragment) OS=Juglans regia OX=51240 GN=F2P56_011943 PE=3 SV=1	22	6	7	6	361	39.4	5.12	20.21	25	27.4	25.5	25.4	27.7	30.4	205.5	214.1	193.4	143.8	141.3	140.7
A0A2I4EPM4	exocyst complex component SEC6 OS=Juglans regia OX=51240 GN=LOC108991528 PE=3 SV=1	10	7	9	7	756	86.3	4.84	23.05	108.2	108.1	114.8	117.6	113.6	116.2	95.1	85.7	93.2	80.7	84.4	82.2
A0A6P9ETK0	uncharacterized protein LOC108980890 isoform X2 OS=Juglans regia OX=51240 GN=LOC108980890 PE=4 SV=1	5	3	11	3	859	96.1	5.74	28.46	50.6	52.5	60	59.1	55.2	58.6	122.7	127.3	122.7	162.3	167.3	161.6
A0A2I4E611	actin-depolymerizing factor OS=Juglans regia OX=51240 GN=LOC108986621 PE=3 SV=1	30	3	8	1	139	16	6.57	27.79	86.7	88	83.7	79.4	84.3	80.3	141.4	144.6	127.8	108.8	92	83
A0A833UU72	Tyrosine--tRNA ligase (Fragment) OS=Juglans regia OX=51240 GN=F2P56_020518 PE=3 SV=1	10	4	15	4	417	47.2	7.12	32.19	88.9	86.7	88.9	90.6	84.8	86.9	111.8	111.5	105.8	115.6	113.6	115
A0A2I4E1F3	polyadenylate-binding protein RBP47B' isoform X2 OS=Juglans regia OX=51240 GN=LOC108985390 PE=4 SV=1	14	3	4	3	421	46.4	5.35	19.1	94.8	94.7	87.8	93	87.3	91.3	112.5	108.2	101.3	114.4	101.5	113.1
A0A2I4F6P0	NADH dehydrogenase [ubiquinone] 1 alpha subcomplex subunit 9, mitochondrial OS=Juglans regia OX=51240 GN=LOC108996031 PE=4 SV=1	15	7	13	7	400	43.7	9	30.52	82	82.7	79.4	107.7	108.8	107.6	104.4	104.4	105	106.9	107.7	103.3
A0A2I4E766	protein argonaute 4A-like OS=Juglans regia OX=51240 GN=LOC108986895 PE=3 SV=1	9	7	9	2	928	103.8	8.65	19.59	37.7	41.2	42.3	38.2	39.5	40	147.7	145.7	137.4	176.6	177	176.7
A0A833Y762	Phosphoserine phosphatase OS=Juglans regia OX=51240 GN=F2P56_003834 PE=3 SV=1	11	2	8	2	302	33	6.92	22.12	53	54	48.8	53.6	54.7	60.4	141.4	144.8	143.5	138.8	154.3	152.6
A0A2I4GFE4	Pyruvate kinase OS=Juglans regia OX=51240 GN=LOC109007410 PE=3 SV=1	8	5	8	3	650	71.9	8.38	24.68	134.3	143	138.1	133.5	125.1	130.5	68.1	72.3	71.9	63.9	58.3	61
A0A2I4EU36	1-aminocyclopropane-1-carboxylate oxidase OS=Juglans regia OX=51240 GN=LOC108992749 PE=3 SV=1	10	3	5	3	318	36	5.33	17.82	30.5	30.9	30	34.9	32.9	34	159.2	163	169.3	165.2	175.6	174.7
A0A6P9E2S9	ADP-ribosylation factor-like protein 8a isoform X1 OS=Juglans regia OX=51240 GN=LOC109021666 PE=3 SV=1	21	2	5	1	184	20.5	5.24	20.67	119.7	101.6	119.5	115.4	117.3	109.3	84.9	98.7	77.6	90.8	84.8	80.5
A0A2I4E6R2	2-methylene-furan-3-one reductase-like OS=Juglans regia OX=51240 GN=LOC108986779 PE=3 SV=1	9	3	8	2	384	40.8	8.51	26.8	18.8	21.4	19.7	19.5	22	21.2	180.8	181.7	175.6	173.6	183.6	182.1
A0A833XE87	Uncharacterized protein OS=Juglans regia OX=51240 GN=F2P56_014931 PE=4 SV=1	4	5	7	1	1261	136.4	7.8	21.11	59.9	82.2	57.9	56.1	68.7	56.7	151.4	131.7	155.6	124.3	130.8	124.4
A0A2I4DL18	uncharacterized protein LOC108981175 OS=Juglans regia OX=51240 GN=LOC108981175 PE=4 SV=1	8	9	11	9	1321	142.2	7.37	21.95	86.7	82.9	86.8	82.2	84.8	81.7	127.6	130.3	123.1	102.1	105.3	106.7
A0A2I4G0H5	farnesyl pyrophosphate synthase 1-like OS=Juglans regia OX=51240 GN=LOC109003627 PE=3 SV=1	16	6	13	6	342	39.5	5.92	30.04	126.6	128.7	128.6	118.5	115.9	115.1	76.8	74.9	76.5	81.1	79.7	77.6
A0A2I4G021	CAAX prenyl protease OS=Juglans regia OX=51240 GN=LOC109003529 PE=3 SV=1	13	6	8	6	424	48.5	7.71	23.58	120.1	119.4	122.3	116.2	107.6	107.8	79.2	81.8	80.2	86.2	89	90.1
A0A834CY36	4-alpha-glucanotransferase OS=Juglans regia OX=51240 GN=F2P56_006221 PE=3 SV=1	8	7	9	7	976	112.5	6.49	25.34	132.2	134	136.3	128.3	120.6	131.6	69.5	65.6	68	69	71.4	73.5
A0A2I4DP25	Glucose-6-phosphate 1-dehydrogenase OS=Juglans regia OX=51240 GN=LOC108982085 PE=3 SV=2	10	6	8	2	594	67.8	8.72	24.19	58.1	53.3	63.8	49.8	58.2	58.9	157	145	152.2	136	131.8	135.9
A0A2I4H629	Exocyst complex component Sec8 OS=Juglans regia OX=51240 GN=LOC109013848 PE=3 SV=2	7	7	8	1	1062	118	5.85	23.84	90.8	96.2	114.3	106.2	81.9	97.8	101.8	88	102.2	130.7	98	92.1
A0A6P9F6V8	Eukaryotic translation initiation factor 3 subunit A OS=Juglans regia OX=51240 GN=LOC109005263 PE=3 SV=1	6	5	8	2	936	108.7	8.9	22.8	103.5	104	108.5	111.7	110.2	111.1	99.8	91.1	105	85	79.9	90.2
A0A2I4H513	Thioredoxin-dependent peroxiredoxin OS=Juglans regia OX=51240 GN=LOC109013543 PE=4 SV=1	15	3	8	3	269	29.7	8.5	27.2	65.1	65.2	64.6	74.5	73.9	72.7	118.1	116.6	121.6	138.9	143.5	145.3
A0A2I4FFC4	ATP-dependent 6-phosphofructokinase OS=Juglans regia OX=51240 GN=LOC108998278 PE=3 SV=1	7	3	8	3	529	58.1	7.68	24.73	96.7	100.4	107.2	102.9	96.4	102.3	87.7	90.3	92.1	108.8	105.5	109.6
A0A2I4E905	Conserved oligomeric Golgi complex subunit 7 OS=Juglans regia OX=51240 GN=LOC108987411 PE=3 SV=1	6	5	7	5	839	92.7	5.38	18.71	109.7	112.7	116.6	114	108.2	108.8	102.9	90.5	95.9	79.7	85.9	74.9
A0A834D1B6	Uncharacterized protein OS=Juglans regia OX=51240 GN=F2P56_009452 PE=4 SV=1	11	2	13	1	205	21.9	4.96	34.12	32.9	30.7	26.9	34.4	39.4	32.1	105.2	104.8	100.4	240.8	234.9	217.6
A0A1C9M3A2	Photosystem I P700 chlorophyll a apoprotein A2 OS=Juglans sigillata OX=224355 GN=psaB PE=3 SV=1	10	5	7	5	734	82.4	7.17	18.99	57.5	52.7	60.5	60.7	58.1	57.7	146.6	149.4	146.4	133	137.2	140.2
A0A2I4FNI2	Small nuclear ribonucleoprotein-associated protein OS=Juglans regia OX=51240 GN=LOC109000676 PE=3 SV=1	17	4	7	4	275	29.2	10.9	20.73	73.1	81.1	86	76.8	84.5	80.6	135.4	125.4	110.3	122.6	111.5	112.7
A0A6P9E8W9	Calcium-transporting ATPase OS=Juglans regia OX=51240 GN=LOC109021132 PE=3 SV=1	5	5	9	2	1091	119.1	7.42	24.05	116.4	123.8	126.5	117.3	127.7	122.6	77.5	80	75.9	82.3	73.4	76.6
A0A2I4FSV0	protein MOR1-like OS=Juglans regia OX=51240 GN=LOC109001777 PE=3 SV=1	5	8	10	8	2029	223.5	7.68	24.91	96	98.1	99.5	117	111.6	113.9	97.7	99.5	103	86.6	87.8	89.3
A0A2I4FAD5	[Acyl-carrier-protein] S-malonyltransferase OS=Juglans regia OX=51240 GN=LOC108996994 PE=4 SV=1	11	4	6	1	414	44	8.28	20.22	98.8	108.7	125	75	85.6	84.7	117.8	112.9	107	121.6	85.3	77.7
A0A2I4EV03	Histone H2B OS=Juglans regia OX=51240 GN=LOC108992962 PE=3 SV=1	34	5	11	5	148	16.2	10.08	32.5	86.7	82.3	84.8	80.2	85.8	80.7	115.6	112	109	121.5	126.8	114.6
A0A6P9DXN7	V-type proton ATPase subunit a OS=Juglans regia OX=51240 GN=LOC109017190 PE=3 SV=1	9	8	13	3	819	93.2	5.83	32.89	95.4	91.7	95.2	83.7	83.1	85.7	125.5	119.4	110.3	105.6	103.8	100.7
A0A2I4GHA7	Mitochondrial-processing peptidase subunit alpha OS=Juglans regia OX=51240 GN=LOC109007870 PE=3 SV=1	5	2	11	2	505	54.5	6.21	30.14	113.3	112.6	108.3	118	110.4	116.4	79.1	73.9	80	90	98.1	99.9
A0A2I4DYV9	17.1 kDa class II heat shock protein OS=Juglans regia OX=51240 GN=LOC108984742 PE=3 SV=1	32	4	7	4	157	17.6	5.73	22.35	93.2	103	85.7	81.2	71.9	70.2	120.1	135.1	116.2	102.6	112.2	108.6
A0A2I4FQZ8	Aspartokinase OS=Juglans regia OX=51240 GN=LOC109001299 PE=3 SV=1	8	4	6	2	548	59.9	7.3	16.67	117.8	118.9	123.2	125.7	125.3	118.7	72	66.4	71.8	89.4	86.5	84.2
A0A834D707	Uncharacterized protein OS=Juglans regia OX=51240 GN=F2P56_005364 PE=3 SV=1	32	5	13	1	135	15.2	4.53	31.38	76.4	83.5	77.8	83.8	85.6	85.9	115.1	117	124.8	115.3	117.8	117
A0A834CWY9	Hexosyltransferase OS=Juglans regia OX=51240 GN=F2P56_016790 PE=3 SV=1	9	7	11	2	674	76.9	9.44	27.35	146.5	146.5	146.6	142.5	135.2	139.5	58.4	59.9	63.1	53.1	54.3	54.4
A0A6P9EJC3	Prefoldin subunit 3 OS=Juglans regia OX=51240 GN=LOC109010771 PE=3 SV=1	13	2	6	2	205	22.9	6.34	21.25	78	76.7	74.4	73.1	82.6	79.1	128.6	125.3	128.7	115.9	119.7	118
A0A834CSD1	Uncharacterized protein (Fragment) OS=Juglans regia OX=51240 GN=F2P56_016867 PE=3 SV=1	14	5	7	5	399	43.4	7.34	20.67	114.2	109.3	109.2	118.9	121	124.3	76.8	82.7	82.6	83.2	86.8	91.1
A0A2I4H0U5	vacuolar-sorting protein BRO1-like OS=Juglans regia OX=51240 GN=LOC109012513 PE=4 SV=1	8	7	10	1	867	97.4	6.44	24.81	90.4	95.7	114.4	105.6	101.6	111.1	92	94.3	113.4	90.6	88.8	102
A0A2I4GYI9	Serine/threonine-protein phosphatase OS=Juglans regia OX=51240 GN=LOC109012011 PE=3 SV=1	22	7	10	2	316	35.9	5.91	25.32	59	59.5	78.5	63.6	65.5	63	141.5	135.6	124.9	139	128.5	141.3
A0A2I4GAF3	transducin beta-like protein 2 OS=Juglans regia OX=51240 GN=LOC109006159 PE=4 SV=1	12	5	10	5	434	47	8.95	24.08	131.2	129.2	128	118.6	118	115.7	86.2	74.1	78	72	79.8	69
A0A2I4GT64	LL-diaminopimelate aminotransferase, chloroplastic-like OS=Juglans regia OX=51240 GN=LOC109010645 PE=3 SV=1	9	4	9	4	461	50.1	6.64	26.58	62.6	59.7	60.6	68.5	68.6	72.7	129.1	132.1	123.6	141.7	141.9	139
A0A6P9EA25	Cellulose synthase OS=Juglans regia OX=51240 GN=LOC109011298 PE=3 SV=1	5	8	10	3	1414	157.4	6.89	13.55	26.6	28.6	28.9	26.8	29.4	27.6	184.3	185.6	176.3	155.7	165.9	164.3
A0A2I4GVX4	protein BTR1-like isoform X3 OS=Juglans regia OX=51240 GN=LOC109011343 PE=4 SV=2	11	3	7	3	304	32.5	8.12	24.84	149	151	146.2	152.6	158.2	150.9	51.2	46.6	49.9	48	46.5	49.9
A0A2I4GUG2	shikimate O-hydroxycinnamoyltransferase-like OS=Juglans regia OX=51240 GN=LOC109010986 PE=4 SV=2	11	4	9	4	436	48.5	6.4	26.59	30.2	33.6	32.7	31.7	31.6	31.9	149.6	149.2	149	181.7	188.9	189.7
A0A2I4G522	alpha-soluble NSF attachment protein 2 OS=Juglans regia OX=51240 GN=LOC109004758 PE=3 SV=1	12	3	13	3	289	32.8	5.17	37.71	99.6	100	96.4	109.5	107.8	109.2	103.7	102.6	104.9	86.1	89.5	90.8
A0A2I4GNB6	Phosphomannomutase OS=Juglans regia OX=51240 GN=LOC109009383 PE=3 SV=1	27	6	11	3	248	28.1	6.04	27.49	69.7	67.9	71.1	78	79.9	71.8	123	123	112	137.7	126.5	139.3
A0A2I4DLY6	probable inactive serine/threonine-protein kinase scy1 OS=Juglans regia OX=51240 GN=LOC108981444 PE=4 SV=1	8	6	8	1	790	86	6.74	23.29	95.9	99.4	88.3	108.3	101.1	109	105.3	110.1	111.8	91.5	89.9	89.4
A0A834CNI2	Acylaminoacyl-peptidase OS=Juglans regia OX=51240 GN=F2P56_016002 PE=3 SV=1	4	2	4	2	773	84.5	5.57	16.74	40.3	42.2	45.9	44.1	40.8	44.2	139.5	137.8	138.6	171.4	176.9	178.4
A0A2I4F543	40S ribosomal protein S3a OS=Juglans regia OX=51240 GN=LOC108995628 PE=3 SV=1	14	6	18	6	261	29.8	9.82	42.08	138.1	136.4	135.1	127.8	133.1	129.4	59	62.4	63	74.1	71.5	70.1
A0A2I4F0G5	RGG repeats nuclear RNA binding protein A OS=Juglans regia OX=51240 GN=LOC108994390 PE=4 SV=1	7	3	8	3	362	39	6.3	22.3	100.2	102.2	99.2	184	179.9	180.7	53.5	56.7	60.3	59.8	61.1	62.3
A0A2I4FVM5	ATP-dependent RNA helicase DBP2-like isoform X2 OS=Juglans regia OX=51240 GN=LOC109002414 PE=3 SV=1	10	5	13	3	510	55.3	6.76	35.96	76.7	77.3	74.6	71.4	80.2	73.9	126.1	129.8	121.3	123.9	124.7	120
A0A2I4EHS1	UMP-CMP kinase OS=Juglans regia OX=51240 GN=LOC108989674 PE=3 SV=1	19	4	11	4	233	26.5	8.32	35.01	132.9	138.8	123.2	189.9	193.2	185.2	41.2	38.5	46.1	37.2	37.4	36.2
A0A2I4EX83	protein translation factor SUI1 homolog 1-like OS=Juglans regia OX=51240 GN=LOC108993512 PE=3 SV=1	42	3	7	3	113	12.6	8.43	24.21	123.9	117.2	116.2	150.5	166.1	157.7	56.7	56.6	61.1	63.7	63.3	67
A0A2I4ENS6	Exocyst complex component SEC5 OS=Juglans regia OX=51240 GN=LOC108991329 PE=3 SV=1	6	7	11	7	1094	123.4	5.63	26.06	120.3	119.9	120.1	122.5	120.2	116.5	93.9	88.3	90.4	68	68.9	70.9
A0A2I4FBB9	protein TOPLESS-RELATED PROTEIN 2-like isoform X2 OS=Juglans regia OX=51240 GN=LOC108997219 PE=4 SV=1	5	7	8	1	1134	125.3	7.33	23.69	78.4	85	86.9	85.5	75.2	84.5	114.2	119.8	114.1	118.9	126.1	111.3
A0A2I4GM14	Serine/threonine-protein phosphatase 2A 55 kDa regulatory subunit B OS=Juglans regia OX=51240 GN=LOC109009056 PE=3 SV=2	7	3	5	1	513	57.1	5.92	15.06	105.8	109.6	106.5	138.2	127.4	130.7	66.7	73.4	70.6	83.1	87.8	100
A0A2I4EIM7	Ribosomal protein L15 OS=Juglans regia OX=51240 GN=LOC108989936 PE=3 SV=1	20	3	13	3	204	24.3	11.43	38.26	207.4	206.2	197	120.1	124.9	125.3	34.4	35.2	38	37.1	36.2	38.1
A0A2I4DJ83	60S ribosomal protein L18-2-like OS=Juglans regia OX=51240 GN=LOC108980661 PE=3 SV=1	30	5	14	2	187	20.9	11.06	38.37	169.7	172.7	174.1	146.7	149.5	153.9	38	30.6	37.1	43.4	42.6	41.6
A0A2I4HMA4	Mg-protoporphyrin IX chelatase OS=Juglans regia OX=51240 GN=LOC109019438 PE=3 SV=1	20	7	10	7	423	45.9	6.67	23.93	72.9	74.1	77.1	72.6	68.6	68	120.9	118.4	122.7	136.4	134	134.4
A0A2I4G0G6	acetyl-CoA acetyltransferase, cytosolic 1 OS=Juglans regia OX=51240 GN=LOC109003620 PE=3 SV=1	12	3	6	3	417	43	8.21	20.45	117	121.2	125.9	129.9	123.7	132.7	73.8	73.6	75.5	76.4	76.3	74
A0A2I4GKP7	N-terminal acetyltransferase A complex catalytic subunit NAA10 OS=Juglans regia OX=51240 GN=LOC109008719 PE=3 SV=1	17	3	11	3	200	22.9	7.53	25.88	100.3	101.6	103.4	99.9	102.4	102.6	94.7	97.4	99.9	99.7	99.1	98.9
A0A2I4EJ09	vacuolar-sorting receptor 1-like OS=Juglans regia OX=51240 GN=LOC108990013 PE=3 SV=1	8	5	10	4	619	68.6	5.3	22.64	66.8	70.2	68	74.6	72.7	70.8	117.1	112.2	116.7	138.1	149.9	142.9
A0A2I4DM01	DEAD-box ATP-dependent RNA helicase 20 OS=Juglans regia OX=51240 GN=LOC108981456 PE=3 SV=1	7	4	8	2	662	70.8	10.02	22.04	91	101	96.1	130.1	121.5	111.6	91.4	101.2	91.1	85.8	86.9	92.4
A0A2I4E5W0	probable aspartyl aminopeptidase OS=Juglans regia OX=51240 GN=LOC108986585 PE=3 SV=1	9	4	6	1	490	54	6.74	19.72	91.8	90.7	88.7	83.7	86.9	85.1	107	107.7	105.6	118.9	117	116.9
A0A6P9DYD5	Ribonucloprotein OS=Juglans regia OX=51240 GN=LOC109006247 PE=3 SV=1	25	2	5	1	128	13.9	7.12	19.05	84.3	76.9	80.5	101.5	101.8	95.7	90.4	100.5	94.9	131.1	115.3	127.1
A0A833TMT1	Fn3_like domain-containing protein OS=Juglans regia OX=51240 GN=F2P56_036647 PE=4 SV=1	5	3	5	2	791	85.8	7.74	17.74	25.5	27.6	27.6	30.1	28.8	24.6	162.4	178.1	173.7	168.7	176.4	176.5
A0A2I4F775	Acetolactate synthase OS=Juglans regia OX=51240 GN=LOC108996161 PE=3 SV=1	9	4	5	4	661	71.7	6.99	18.4	107.4	113.8	108.5	141.2	132.7	116.4	83.9	73.6	75.5	86.7	80.3	80
A0A2I4H253	uncharacterized protein At4g28440-like OS=Juglans regia OX=51240 GN=LOC109012841 PE=4 SV=1	33	3	4	2	152	16.7	6.57	14.87	81.7	89.3	85.4	133.9	122.8	124	96.7	79.3	99.7	99.1	89.7	98.3
A0A2I4FGA3	uncharacterized protein LOC108998567 isoform X2 OS=Juglans regia OX=51240 GN=LOC108998567 PE=4 SV=1	5	4	5	4	885	97	4.69	15.7	103.4	109.7	117.2	95.7	96	101.9	98.9	98.7	102.2	91.7	95.2	89.4
A0A6P9E1H3	Adenylate kinase OS=Juglans regia OX=51240 GN=LOC108999611 PE=3 SV=1	16	5	8	3	247	27	7.8	20.5	115	116.3	113.6	114.7	107.5	114.4	92.9	90.2	97.8	85.8	77.5	74.3
A0A2I4HPM6	Delta-aminolevulinic acid dehydratase OS=Juglans regia OX=51240 GN=LOC109020143 PE=3 SV=1	10	3	6	3	430	47	6.29	18.06	78.5	73.2	75.5	99.4	93.3	83.2	116.1	114.9	106.9	118.9	119.5	120.5
A0A2I4GHI2	DEAD-box ATP-dependent RNA helicase 20 OS=Juglans regia OX=51240 GN=LOC109007912 PE=3 SV=2	11	5	9	3	504	55.8	9.01	19.35	90.2	85.7	94.7	101.8	87.4	92.8	99.4	111.1	107.7	112.7	108.9	107.4
A0A2I4FPC3	uncharacterized protein LOC109000915 OS=Juglans regia OX=51240 GN=LOC109000915 PE=4 SV=1	9	3	7	2	378	41.6	9.74	21.26	78.9	76.1	73.5	78.8	80.4	76.6	117.2	117.1	125.4	120.5	130.7	124.9
A0A2I4H5K6	AP-4 complex subunit mu isoform X1 OS=Juglans regia OX=51240 GN=LOC109013702 PE=3 SV=1	10	4	8	1	451	50.6	6.73	25.54	74.2	73.6	87.1	73.4	63.3	76.2	115	118	126.1	130.7	123	139.4
A0A2I4EB32	60S ribosomal protein L6-like OS=Juglans regia OX=51240 GN=LOC108987972 PE=3 SV=1	20	6	15	5	233	26.1	10.23	40.86	152.3	152.9	142.5	136.2	144.9	141.7	40.4	42.2	44.4	69.5	68.5	64.4
A0A2I4GIX1	V-type proton ATPase subunit a OS=Juglans regia OX=51240 GN=LOC109008274 PE=3 SV=2	6	5	9	1	816	92.7	5.85	24.52	137.3	139.7	127.5	133.3	130.1	107.3	57.6	73	61.7	83.6	76.9	72
A0A2I4F7I4	myosin-11-like OS=Juglans regia OX=51240 GN=LOC108996274 PE=4 SV=1	4	5	16	3	1379	155	4.75	38.69	26	28.5	29	28.3	28.6	29.3	214.6	230.2	217.6	120.7	123.2	124
A0A2I4ECI5	TOM1-like protein 1 OS=Juglans regia OX=51240 GN=LOC108988333 PE=3 SV=1	18	7	9	6	394	44	4.84	23.07	74.9	82	80.4	85.6	83.5	84.7	123.3	129.5	122.3	110.2	112.5	111.2
A0A2I4GNP5	nucleosome assembly protein 12-like OS=Juglans regia OX=51240 GN=LOC109009493 PE=3 SV=1	10	3	7	3	371	42.6	4.5	21.5	50.4	47.7	55.3	66.1	62.4	63.8	137.6	143.7	137.5	140.4	144.8	150.2
A0A2I4H461	DNA gyrase subunit B OS=Juglans regia OX=51240 GN=LOC109013350 PE=3 SV=1	10	5	5	5	744	82.8	8.78	16.61	91.3	94.6	100.9	94.7	94.5	103.6	96.4	95.3	102	106.6	109.1	111
A0A6P9EPL1	Phospho-2-dehydro-3-deoxyheptonate aldolase OS=Juglans regia OX=51240 GN=LOC118348394 PE=3 SV=1	27	5	7	2	198	22.2	9.36	16.37	96.5	106.2	103.4	115.4	103.5	108.8	85.8	74.5	82.2	103.8	112.7	107.2
A0A2I4GNC3	Acyl-coenzyme A oxidase OS=Juglans regia OX=51240 GN=LOC109009398 PE=3 SV=1	11	7	8	7	689	77.5	8.59	23.32	76.8	80.8	79.8	76.5	73.4	69	115.3	116.5	122.6	123.3	130.5	135.5
A0A2I4EX55	Trafficking protein particle complex subunit OS=Juglans regia OX=51240 GN=LOC108993490 PE=3 SV=1	23	5	11	1	186	20.8	4.46	25.26	79.9	80.1	81.3	86	83.9	85.3	118.4	123.1	121.5	113.9	113.5	113.1
A0A2I4FU69	ABC transporter G family member 31 OS=Juglans regia OX=51240 GN=LOC109002064 PE=3 SV=1	3	4	6	3	1429	160	8.76	18.98	199.8	189.2	185.1	169.5	168.5	166.1	14.6	17.9	23.3	23.2	21.4	21.4
A0A2I4EHA3	ATPase family AAA domain-containing protein 1-B-like isoform X1 OS=Juglans regia OX=51240 GN=LOC108989584 PE=3 SV=1	10	3	7	2	391	43.5	6.02	22.11	108.3	112.1	121.6	134.5	134.9	123.4	73.7	75.5	77.8	74.4	78.7	85
A0A2I4DWZ5	polypyrimidine tract-binding protein homolog 3 OS=Juglans regia OX=51240 GN=LOC108984238 PE=4 SV=1	9	3	4	3	443	49.4	7.4	14.88	85.3	85	91	80.8	78.9	80.5	123.2	112.2	107.2	123.8	116.8	115.3
A0A2I4EVV3	ADP,ATP carrier protein OS=Juglans regia OX=51240 GN=LOC108993173 PE=3 SV=1	8	5	9	5	625	68.5	9.41	23.74	90.8	86	89.6	103.2	103.2	100.1	91	88.3	90.2	116.7	120.3	120.5
A0A2I4HS20	protein transport protein SEC24 OS=Juglans regia OX=51240 GN=LOC109020880 PE=4 SV=1	8	5	9	5	744	82.5	5.06	25.79	110.7	114.4	107.2	96.5	93.2	97.7	102.7	105.6	104.6	89.9	89.1	88.4
A0A2I4FSL0	enoyl-[acyl-carrier-protein] reductase [NADH], chloroplastic-like OS=Juglans regia OX=51240 GN=LOC109001699 PE=3 SV=1	10	3	10	1	392	41.2	8.9	23.29	66.5	64.5	70.7	78.2	74.6	83.5	132.3	124	128.6	124.6	125.6	126.8
A0A2I4GUT5	solanesyl diphosphate synthase 3, chloroplastic/mitochondrial isoform X1 OS=Juglans regia OX=51240 GN=LOC109011071 PE=3 SV=2	13	5	8	2	421	46.5	6.84	18.8	137.2	136.4	140	148.6	146.7	148.5	55.3	56.9	59.2	54.7	57.2	59.4
A0A6P9EKE1	Alanine transaminase OS=Juglans regia OX=51240 GN=LOC109013066 PE=3 SV=1	8	4	9	2	537	59	5.88	24.44	96.1	102.1	102.6	90.2	91.2	93.9	98.6	96.5	100.5	113.1	110.6	104.6
A0A2I4G166	protein CDI-like OS=Juglans regia OX=51240 GN=LOC109003797 PE=4 SV=1	20	4	10	4	256	29.6	6.43	24.25	155.5	156.2	155.7	153.7	153	157	40.5	43.1	48.9	46.5	43.9	45.9
A0A2I4DKB8	EH domain-containing protein 1-like OS=Juglans regia OX=51240 GN=LOC108980984 PE=4 SV=2	10	4	7	4	545	61.4	7.06	21.41	91.8	82.9	90.1	87.7	89.9	84.4	114.4	112.7	122.2	102.7	112.2	108.8
A0A2I4EL95	monothiol glutaredoxin-S17 OS=Juglans regia OX=51240 GN=LOC108990624 PE=3 SV=2	9	3	6	3	492	53.6	5.26	18.81	112.8	111.3	108.3	127.1	117.8	117.2	80.1	82.6	82.8	84.6	89.7	85.7
A0A2I4H1S9	patellin-3-like OS=Juglans regia OX=51240 GN=LOC109012759 PE=3 SV=2	9	6	14	2	618	68.5	4.73	45.04	21.6	22.6	23.7	24.8	24.9	24.1	193.1	195.1	181.2	161.8	164.7	162.3
A0A2I4EIH2	60S ribosomal protein L37a-1-like OS=Juglans regia OX=51240 GN=LOC108989886 PE=3 SV=1	35	3	11	3	92	10.2	10.36	33.51	158.8	152	153.8	131.1	135.6	132.2	40.8	42.6	48.8	67.1	68.6	68.5
A0A6P9F3B3	ADP-ribosylation factor 1 isoform X2 OS=Juglans regia OX=51240 GN=LOC108991149 PE=3 SV=1	25	3	4	3	175	19.6	5.19	14.77	100.8	105.2	99.9	99.6	109.6	103.9	103	100.6	108.1	86	90.4	92.8
A0A2I4HPN9	Protein disulfide-isomerase OS=Juglans regia OX=51240 GN=LOC109020152 PE=3 SV=1	9	4	15	3	502	55.9	5.02	34.24	82.2	75.4	82.5	102.3	99.3	103.3	82.2	105.2	105.2	114.3	121.3	126.8
A0A6P9EE65	Peptidylprolyl isomerase OS=Juglans regia OX=51240 GN=LOC109008514 PE=4 SV=1	8	6	10	4	562	63	5.5	22.58	93.6	93.3	93.4	104.7	104.7	103.6	105.9	104.2	100	99.5	99.9	97.1
A0A2I4HKM0	serine/threonine-protein kinase SAPK10-like isoform X1 OS=Juglans regia OX=51240 GN=LOC109018966 PE=3 SV=1	15	5	7	2	362	41.1	4.88	21.57	89.7	90.5	87	102.2	100.1	102.3	107.5	108.9	108.9	98.5	99.6	104.8
A0A2I4E4G4	topless-related protein 4-like OS=Juglans regia OX=51240 GN=LOC108986207 PE=4 SV=1	7	9	10	4	1132	124.5	7.21	24.31	87.8	80.7	84.2	89.1	84.6	80.9	109.5	106.3	101.9	118.7	131.2	125.1
A0A2I4EWW0	synaptotagmin-1-like OS=Juglans regia OX=51240 GN=LOC108993422 PE=3 SV=1	10	6	12	1	538	61.5	7.31	32.6	82	83.5	83.8	79.9	81.8	80.6	118.7	123.2	122.2	108.3	118.1	117.8
A0A834CU35	Beta-amylase OS=Juglans regia OX=51240 GN=F2P56_015787 PE=3 SV=1	11	6	6	6	636	70.9	7.06	15.44	115.5	113.7	115.9	157.8	155.5	155.2	60.1	62.8	60	66.5	64.5	72.4
A0A2I4H087	Prohibitin OS=Juglans regia OX=51240 GN=LOC109012399 PE=3 SV=1	11	3	8	3	297	32.7	9.39	25.18	99.5	92.6	94.7	106.6	114	112.2	95.8	92.4	95.7	100.9	98.7	97.1
A0A6P9EJS4	ATPase LOC109011040 OS=Juglans regia OX=51240 GN=LOC109011040 PE=3 SV=1	10	5	9	5	357	40.2	4.89	20.23	135.5	134.7	132.2	138.6	130.6	135.7	63.9	67.2	66.5	62.9	67.4	64.8
A0A6P9DWC6	AT-hook motif nuclear-localized protein OS=Juglans regia OX=51240 GN=LOC108980488 PE=4 SV=1	11	3	6	3	336	34.7	9.19	16.1	23.6	26.3	25.8	24	29.6	31.1	168.2	167.6	165	182.1	173.1	183.8
A0A2I4F276	aldehyde dehydrogenase 22A1 OS=Juglans regia OX=51240 GN=LOC108994823 PE=3 SV=1	8	4	9	4	596	66	7.44	27.82	99.8	103.9	102.7	103.4	101.2	100.8	104	100.9	99.6	92.3	95	96.5
A0A2I4E7E2	probable receptor-like protein kinase At4g39110 OS=Juglans regia OX=51240 GN=LOC108986963 PE=4 SV=2	6	4	6	2	872	95.8	6.01	19.28	126.6	127.1	126.1	103.4	102	108.8	94.9	99.4	95.7	71.9	71.4	72.6
A0A2I4GZ05	Phosphomannomutase OS=Juglans regia OX=51240 GN=LOC109012105 PE=3 SV=1	24	6	9	3	248	28.1	6.35	20.08	76.6	80	84.8	82.2	81.9	87.6	113.3	116	108.7	123.7	122.2	123.1
A0A6P9EIF5	Beta-galactosidase OS=Juglans regia OX=51240 GN=LOC109008414 PE=3 SV=1	5	5	13	5	892	100.5	6.86	35.3	70.9	67.9	71.6	70.5	64.7	65.5	131.5	126.5	119.2	144.1	134.3	133.3
A0A2I4EC53	40S ribosomal protein S19-3 OS=Juglans regia OX=51240 GN=LOC108988231 PE=3 SV=1	34	6	14	6	143	15.9	10.15	32.76	99.2	100.6	103.6	103.1	105.3	105.2	98.9	90.2	90.9	103.5	99.5	100.2
A0A2I4HNP8	60S ribosomal protein L35a-1-like OS=Juglans regia OX=51240 GN=LOC109019864 PE=3 SV=1	30	3	9	3	112	12.8	10.7	28.87	133.7	135.2	136.5	118.4	117.7	112.8	47.9	46.7	49.8	100.1	103.9	97.3
A0A2I4EVZ6	Chlorophyll a-b binding protein, chloroplastic OS=Juglans regia OX=51240 GN=LOC108993199 PE=3 SV=1	27	4	7	4	271	29.1	5.26	22.49	21.9	70.8	24	71.8	25	26.6	154.7	158.3	155.6	157.9	170.7	162.6
A0A6P9DV75	PTI1-like tyrosine-protein kinase 3 OS=Juglans regia OX=51240 GN=LOC108985205 PE=4 SV=1	20	6	6	6	369	41.1	8.82	16.8	94.3	100.3	100	96.4	98.4	101.1	118.5	119.4	113.9	93.3	81.1	83.3
A0A2I4FYU3	integrin-linked protein kinase 1-like OS=Juglans regia OX=51240 GN=LOC109003225 PE=3 SV=1	16	8	13	2	431	48.9	8.21	35.5	94.3	90.5	95.8	95.5	94.3	96.1	123.3	121.2	121.1	87.3	91.4	89.2
A0A6P9E8S3	60S ribosomal protein L13a-4-like OS=Juglans regia OX=51240 GN=LOC109006026 PE=3 SV=1	26	5	12	2	208	23.8	10.32	23.74	126.9	124.4	128.3	132.5	127.8	124.5	64	60.1	55	89.3	80.7	86.6
A0A6P9EX66	phenylcoumaran benzylic ether reductase Betv6-like isoform X2 OS=Juglans regia OX=51240 GN=LOC118348784 PE=4 SV=1	12	3	9	1	310	34.7	5.73	23.81	41.4	41.9	41.1	45.7	57	57.1	144	154.3	134	159.2	163.3	161.1
A0A2I4DUW8	Alkaline/neutral invertase OS=Juglans regia OX=51240 GN=LOC108983681 PE=3 SV=1	6	3	8	1	558	63.4	6.67	27.51	100.9	101.8	112.6	96.1	92.8	90	100.4	94.2	95.2	104.2	97.8	114.1
A0A2I4F9V0	Pre-mRNA cleavage factor Im 25 kDa subunit OS=Juglans regia OX=51240 GN=LOC108996839 PE=3 SV=1	21	4	6	4	200	22.9	9.22	19.7	77.1	73.6	77.7	88.8	83.1	82.6	113.5	112.4	114.7	121.5	128.5	126.4
A0A2I4FW17	Choline-phosphate cytidylyltransferase OS=Juglans regia OX=51240 GN=LOC109002517 PE=3 SV=1	15	4	9	1	313	36.5	5.78	23.54	122.8	118.1	130.6	135.8	136.8	127.4	64.8	61.4	63.3	76.4	79.7	83
A0A2I4E7J0	SH3 domain-containing protein 2-like OS=Juglans regia OX=51240 GN=LOC108986995 PE=4 SV=1	12	4	8	1	370	41.1	7.05	22.83	81.4	84.5	83.1	80.3	80	81	126.9	130	127.3	105.5	109.4	110.5
A0A2I4DP70	synaptotagmin-2 OS=Juglans regia OX=51240 GN=LOC108982114 PE=3 SV=1	13	8	10	4	541	61.5	7.02	26.95	108.2	103.8	106	100.2	99.7	98.8	107.1	102.5	99.7	93.5	92.1	88.4
A0A2I4H8F1	Eukaryotic translation initiation factor 3 subunit D OS=Juglans regia OX=51240 GN=LOC109014421 PE=3 SV=1	14	7	11	7	568	64.6	5.43	22.99	112	113.5	112.4	116	115.3	115	84.7	82.8	82.6	93	87.3	85.4
A0A2I4FRI0	cytochrome c OS=Juglans regia OX=51240 GN=LOC109001418 PE=3 SV=1	36	4	10	4	113	12.4	9.32	24.98	131.1	133	139	103.1	96.6	100.8	81.4	78.7	82.5	87.5	81	85.3
A0A2I4F2A1	glyoxysomal fatty acid beta-oxidation multifunctional protein MFP-a-like OS=Juglans regia OX=51240 GN=LOC108994835 PE=3 SV=1	6	3	4	1	726	79.5	8.78	14.59	122.3	111.7	119.5	83.7	93.8	84.3	98.1	109.5	99.9	85.6	94.5	97
A0A833X576	Pyr_redox_2 domain-containing protein (Fragment) OS=Juglans regia OX=51240 GN=F2P56_020486 PE=4 SV=1	11	5	11	5	509	55.9	7.78	30.92	134.9	137.2	135.1	117.8	113.6	115.7	73.4	70.4	72.5	77.2	75.3	77
A0A833U4G3	1-phosphatidylinositol 4-kinase OS=Juglans regia OX=51240 GN=F2P56_036482 PE=3 SV=1	4	7	9	7	2037	224.7	6.38	19.1	107.1	110.8	110	104.6	100.4	96.4	103.1	105.2	105.4	84.2	85.7	86.9
A0A2I4GNT0	Aspartate aminotransferase OS=Juglans regia OX=51240 GN=LOC109009513 PE=3 SV=2	11	4	18	1	392	43.1	7.36	55.89	154.1	150	141.2	147.2	132.7	134.4	61	54.1	56.4	58.7	56	54.2
A0A2I4HFI5	ATP synthase subunit delta', mitochondrial-like OS=Juglans regia OX=51240 GN=LOC109017045 PE=3 SV=1	17	3	7	2	204	21.8	6.54	19.17	114.1	117.4	115.1	153.4	153.9	154	60.4	61.4	60	69.6	69.6	71
A0A833UJC2	Threonine synthase OS=Juglans regia OX=51240 GN=F2P56_027918 PE=3 SV=1	10	4	7	2	542	59.5	8.88	17.16	115.7	111	115.7	112.8	113.8	110.2	80.7	82.6	81.7	87.8	96.1	91.8
A0A833XBL8	Long-chain-fatty-acid--CoA ligase (Fragment) OS=Juglans regia OX=51240 GN=F2P56_019331 PE=4 SV=1	5	4	6	1	728	80.6	7.36	18.19	70	79.1	76.8	81.9	87.4	64.8	113.3	113.8	110.6	116.6	142.2	143.4
A0A2I4FMP0	pto-interacting protein 1 OS=Juglans regia OX=51240 GN=LOC109000476 PE=3 SV=1	19	5	8	5	362	39.1	6.95	10.92	73.6	73.1	74.3	82.5	78.1	81.2	141.4	133.5	130.2	107.5	113.5	111.1
A0A2I4FJ12	phosphatidylinositol 3,4,5-trisphosphate 3-phosphatase and protein-tyrosine-phosphatase PTEN2A-like OS=Juglans regia OX=51240 GN=LOC108999238 PE=3 SV=1	8	5	11	1	615	67.1	5.94	30.28	78.3	93.9	105.7	104.9	103	99.8	103.1	101.2	101	89.3	102.7	117.1
A0A2I4GM19	NADH dehydrogenase [ubiquinone] iron-sulfur protein 7, mitochondrial OS=Juglans regia OX=51240 GN=LOC109009058 PE=3 SV=1	11	3	6	3	213	23.6	9.66	18.86	88.7	81.6	93.4	105.6	97.4	99	104.1	104.9	101.4	101.6	106.5	116
A0A2I4G6R2	Protein-serine/threonine phosphatase OS=Juglans regia OX=51240 GN=LOC109005219 PE=3 SV=1	10	3	5	1	361	39.6	5.27	16.69	87.1	95.2	96.1	107.7	89.2	94.5	115.3	97.6	97.2	126.4	97.3	96.4
A0A6P9E7G7	transportin MOS14-like isoform X1 OS=Juglans regia OX=51240 GN=LOC108999228 PE=4 SV=1	6	5	6	5	960	107	5.49	17.99	70.3	75.5	80.2	73.8	77.4	70.9	130.2	123.4	119	126.3	123.1	129.9
A0A2I4FV43	importin-4 OS=Juglans regia OX=51240 GN=LOC109002293 PE=4 SV=1	4	4	8	4	1048	115.2	4.98	21.29	64.6	61.4	65.8	64.5	59.6	62.3	155.9	151.7	145.3	122.7	125.8	120.3
A0A2I4GM96	phosphatidylinositol 3,4,5-trisphosphate 3-phosphatase and protein-tyrosine-phosphatase PTEN2A-like OS=Juglans regia OX=51240 GN=LOC109009112 PE=3 SV=1	8	5	11	1	614	67	6.15	29.68	102.5	106.2	97.2	106.8	103.9	104	99.1	97.2	103.1	92.4	93.9	93.8
A0A6P9EH64	mannose-1-phosphate guanyltransferase alpha-like isoform X3 OS=Juglans regia OX=51240 GN=LOC108999188 PE=4 SV=1	13	4	5	2	392	43.2	8.16	15.88	90.7	90.5	87.6	79	83.2	84.3	115.1	113.9	107	108.7	119.6	120.3
A0A2I4EE98	cullin-3B OS=Juglans regia OX=51240 GN=LOC108988802 PE=3 SV=1	12	8	8	5	732	85.4	6.81	15.35	120.8	116.5	123.8	136	120.5	128.1	71.6	74.1	79.1	73.7	76	79.8
A0A2I4GKZ9	quinone oxidoreductase 1 OS=Juglans regia OX=51240 GN=LOC109008795 PE=4 SV=2	14	6	8	6	392	42.2	9.23	19.28	108.9	110.9	103.6	114.4	104.4	104.4	87.3	83.5	83.1	101.8	98.4	99.4
A0A2I4EZ17	probable phosphopantothenoylcysteine decarboxylase isoform X2 OS=Juglans regia OX=51240 GN=LOC108994021 PE=4 SV=1	15	2	3	2	216	24.1	7.69	12.25	55.1	56.9	56.4	55.3	58.9	52.7	136.2	123.7	129.6	160.4	157.5	157.4
A0A2I4HRB6	Homoserine dehydrogenase OS=Juglans regia OX=51240 GN=LOC109020641 PE=3 SV=1	16	6	8	6	377	40.4	5.77	20.52	75.6	78.7	81.2	82.8	84.6	83.6	116.9	117	114.9	122.8	119.7	122.2
A0A2I4F5I3	Methylmalonate-semialdehyde dehydrogenase (CoA acylating) OS=Juglans regia OX=51240 GN=LOC108995743 PE=3 SV=1	6	3	8	3	539	58	8.06	22.4	89.7	86.9	93.8	86.1	90.8	93.4	111.4	104.8	114	108.3	108.6	112.3
A0A2I4G2J3	3-hydroxyisobutyryl-CoA hydrolase-like protein 3, mitochondrial isoform X2 OS=Juglans regia OX=51240 GN=LOC109004122 PE=4 SV=2	7	3	8	3	430	47	7.9	28.47	64	65	67.9	70.9	68.7	70.4	130.2	127.2	132.2	133.2	132.1	138.1
A0A2I4H599	2-alkenal reductase (NADP(+)-dependent)-like OS=Juglans regia OX=51240 GN=LOC109013644 PE=4 SV=1	13	4	8	4	349	38.5	6.64	20.3	57.1	61.1	54.4	77.1	77.9	77.9	135.6	136.6	134.1	130	128.4	129.9
A0A6P9E027	probable aspartyl aminopeptidase isoform X2 OS=Juglans regia OX=51240 GN=LOC109013972 PE=3 SV=1	10	4	5	2	527	57.9	7.24	16.1	79.1	77	82.9	89	74.4	82.3	108.1	103	119.8	119	136.2	129.2
A0A2I4DF17	protein unc-13 homolog OS=Juglans regia OX=51240 GN=LOC108979512 PE=4 SV=1	7	6	6	6	985	109.4	7.83	16.38	57	57.4	51	55.4	67.7	55.7	174.2	182.4	152.3	113.8	114.2	119.1
A0A2I4DM10	berberine bridge enzyme-like 8 OS=Juglans regia OX=51240 GN=LOC108981445 PE=3 SV=1	6	4	8	4	548	61.5	8.06	21.73	181.4	171.1	175.5	128.9	129.6	136.4	43.1	44.5	49.2	46.7	47.9	45.6
A0A2I4GX35	Autophagy-related protein OS=Juglans regia OX=51240 GN=LOC109011619 PE=3 SV=1	27	4	6	4	119	13.8	9.13	16.46	131.4	125.4	132.5	146.2	149.9	147.2	61.2	61.6	68.3	54	58.8	63.6
A0A2I4EM37	Beta-galactosidase OS=Juglans regia OX=51240 GN=LOC108990817 PE=3 SV=1	7	5	6	3	832	92.3	7.05	17.19	112.4	117.3	123	97.3	90.5	92.7	100.1	90.4	98.1	93.9	89.9	94.6
A0A833XY01	Uncharacterized protein OS=Juglans regia OX=51240 GN=F2P56_010252 PE=3 SV=1	12	3	8	3	270	29.8	9.2	24.59	119.8	126.2	124.3	105	111.2	109.3	88.2	86.9	88.4	84.6	77.5	78.6
A0A833WLW2	ATP-sulfurylase domain-containing protein OS=Juglans regia OX=51240 GN=F2P56_025336 PE=4 SV=1	39	4	7	1	116	13.2	9.36	20.64	145.4	142.6	140.9	153.4	133.2	157.4	54.8	50	51.7	63.7	49.8	57.3
A0A2I4F7G1	Fumarylacetoacetase OS=Juglans regia OX=51240 GN=LOC108996262 PE=3 SV=1	6	2	9	2	420	45.6	6.33	27.34	48.2	46.8	49.5	45.1	46.1	46.2	152.3	154.6	144.7	158.2	154.2	154.2
A0A2I4FN45	calcium-dependent protein kinase 34-like OS=Juglans regia OX=51240 GN=LOC109000584 PE=4 SV=1	8	4	8	1	533	59.5	6.24	22.44	133.4	137.8	140.3	117.6	109.4	119.1	73.6	72.8	72.4	71.2	80.1	72.4
A0A2I4FNI8	60S ribosomal protein L32-1-like OS=Juglans regia OX=51240 GN=LOC109000709 PE=3 SV=1	24	3	13	3	133	15.6	10.71	44.4	169.4	160.8	155.4	139.1	147.6	138.9	48.6	51	50.1	48.2	45.3	45.6
A0A2I4F8C1	Tubulin gamma chain OS=Juglans regia OX=51240 GN=LOC108996450 PE=3 SV=1	16	7	8	1	474	53.2	5.83	21.58	60.9	61.5	64.3	60.9	57.6	58.7	151.7	161.5	148.7	126.7	121.3	126.3
A0A2I4GK71	probable receptor-like protein kinase At2g42960 OS=Juglans regia OX=51240 GN=LOC109008584 PE=4 SV=1	16	7	9	7	511	56.9	8.18	20.78	53.4	52.8	60.6	56.4	52.7	52.6	167	167.8	164.9	122.7	126.6	122.4
A0A2I4FEB9	ESCRT-related protein CHMP1B OS=Juglans regia OX=51240 GN=LOC108998019 PE=4 SV=1	20	5	9	5	203	22.7	7.2	18.92	97.5	105.3	93.6	139.3	131.2	129.1	79	83.6	81.2	88	86.8	85.3
A0A2I4GQZ0	cinnamoyl-CoA reductase 1-like OS=Juglans regia OX=51240 GN=LOC109010062 PE=4 SV=1	11	4	7	4	338	37	7.05	19.24	21.3	21.5	21.5	22.7	21.7	22.5	120	124.1	117.9	241.6	231.9	233.3
A0A2I4FA36	protein TIC110, chloroplastic isoform X1 OS=Juglans regia OX=51240 GN=LOC108996918 PE=4 SV=1	5	5	7	5	1022	112.6	5.92	19.21	98.1	96.5	100.6	100.5	99.8	96.8	98.4	100.4	101.1	99.5	101.1	107.2
A0A2I4EGW9	Sulfate adenylyltransferase OS=Juglans regia OX=51240 GN=LOC108989481 PE=4 SV=1	14	6	9	4	465	52.2	7.74	23.76	73.1	75.8	80.2	87.4	80.4	78.3	144.8	142.6	132.9	103.5	101.7	99.3
A0A2I4G341	L-ascorbate oxidase homolog OS=Juglans regia OX=51240 GN=LOC109004277 PE=3 SV=1	8	4	8	1	548	60.5	9.26	23.4	46.1	55.1	58.3	71.5	63.1	60.4	181.8	185.9	164.6	100.3	98.8	114.2
A0A2I4GF48	calcium-dependent protein kinase 2-like OS=Juglans regia OX=51240 GN=LOC109007338 PE=4 SV=1	8	4	7	1	533	59.6	6.24	19.16	225.8	196.8	202.8	163.9	159.5	145.4	11	13.9	21.2	19.3	16.6	23.8
A0A2I4GR27	Profilin OS=Juglans regia OX=51240 GN=LOC109010092 PE=3 SV=1	18	2	23	1	131	14.2	4.7	57.25	91.8	93	96.6	98.2	86.9	90.5	112	104.9	106.2	104.9	105.7	109.3
A0A6P9ENW5	Serine/threonine-protein phosphatase OS=Juglans regia OX=51240 GN=LOC109006839 PE=3 SV=1	14	5	9	2	327	36.9	5.49	23.92	136.2	132.1	142.4	142	131.1	134.7	64.2	60.9	64.6	65.8	62.7	63.2
A0A2I4E5H5	Aspartate-semialdehyde dehydrogenase OS=Juglans regia OX=51240 GN=LOC108986474 PE=3 SV=2	9	2	3	2	375	40.7	6.8	13.69	83.3	81.1	90.5	90.8	101.5	89.1	139.9	115.6	106.3	120.7	85.3	96
A0A2I4GVC3	Amine oxidase OS=Juglans regia OX=51240 GN=LOC109011198 PE=3 SV=1	6	3	4	3	731	82.4	6.29	13.95	62.8	64	56.5	58.7	60.7	55	142.4	140.7	145.7	136	140.4	137.4
A0A2I4DYZ8	fimbrin-1 OS=Juglans regia OX=51240 GN=LOC108984777 PE=4 SV=1	10	7	8	5	691	77	5.6	12.81	134.3	132.8	136.1	126.2	125	127.7	67.1	68.8	65.9	71.7	71.2	73.4
A0A2I4DWF7	probable ADP-ribosylation factor GTPase-activating protein AGD8 OS=Juglans regia OX=51240 GN=LOC108984091 PE=4 SV=1	10	4	8	1	403	43.4	8.82	25.54	123.3	124.8	130.7	169.1	175.2	165.1	49.5	49.7	51.9	53.9	54.9	51.8
A0A2I4E969	malignant T-cell-amplified sequence 1 homolog OS=Juglans regia OX=51240 GN=LOC108987470 PE=4 SV=1	19	3	6	3	181	20.1	8.38	19.26	115	117.5	122.3	141.5	141.4	135.9	67.8	69.3	67.6	72.6	73.9	75.2
A0A2I4F260	universal stress protein PHOS32-like OS=Juglans regia OX=51240 GN=LOC108994810 PE=4 SV=1	12	2	4	2	164	18.1	6.55	15.33	108.1	110.3	108	123.5	114.8	118.8	78	68.9	74.2	95	102	98.4
A0A2I4EYB3	Long-chain-fatty-acid--CoA ligase OS=Juglans regia OX=51240 GN=LOC108993803 PE=4 SV=1	9	5	8	5	662	73.9	7.08	20.97	41.4	39.6	42.6	42.4	43.3	44.7	175.5	177.6	173	141.1	137.9	140.9
A0A2I4GKS3	plant UBX domain-containing protein 10-like OS=Juglans regia OX=51240 GN=LOC109008742 PE=4 SV=1	9	4	7	4	473	51.8	5.07	17.11	129.1	130.6	140.4	110.3	115.7	116.1	80.2	79.4	81.5	72.6	71	73.1
A0A6P9ED80	Beta-glucosidase OS=Juglans regia OX=51240 GN=LOC109007633 PE=3 SV=1	6	5	7	4	612	67	5.86	19.74	65.9	65.6	65.5	64.5	68.8	63.1	140.2	140.6	132.8	128.5	129.8	134.9
A0A2I4GSW2	Glycerol-3-phosphate dehydrogenase [NAD(+)] OS=Juglans regia OX=51240 GN=LOC109010571 PE=3 SV=1	12	4	5	4	464	51.9	6.48	14.86	75.3	75.3	84	79.1	82.7	81.8	120.2	117.7	121	117.1	121	124.8
A0A2I4F8P8	cation-chloride cotransporter 1-like OS=Juglans regia OX=51240 GN=LOC108996537 PE=4 SV=1	7	6	9	6	990	108.1	6.49	16.6	99.9	103.9	100	93.3	92.7	91.1	97.7	100.5	102.6	104.5	104.3	109.7
A0A2I4FBL1	60S ribosomal protein L38-like OS=Juglans regia OX=51240 GN=LOC108997277 PE=3 SV=1	54	3	11	3	69	8	10.01	32.05	123.4	121.9	125.3	121.6	119.8	120.1	57.5	60.5	58	93.1	97.4	101.4
A0A2I4DN59	pre-mRNA-splicing factor SYF1-like OS=Juglans regia OX=51240 GN=LOC108981789 PE=4 SV=2	10	8	9	8	913	106.2	6.28	21.32	82.3	79.9	85.3	87.7	83.5	88.5	111.8	113.7	111.9	112.8	125	117.7
A0A2I4FU74	protein KINESIN LIGHT CHAIN-RELATED 1-like OS=Juglans regia OX=51240 GN=LOC109002075 PE=4 SV=2	7	5	8	5	604	66.4	5.74	23.23	21	22.7	22.1	24.4	23.6	28.9	211	221.2	205.9	137.5	140.5	141.2
A0A2I4EXT8	RNA helicase OS=Juglans regia OX=51240 GN=LOC108993689 PE=4 SV=2	10	7	8	7	733	82.9	7.66	17.59	81.3	87.4	86.6	88.8	89.9	90.5	108.1	104.2	104.2	121.1	119.5	118.4
A0A833U7G5	Uncharacterized protein OS=Juglans regia OX=51240 GN=F2P56_022231 PE=3 SV=1	11	6	8	6	451	49.1	9.14	20.09	92.1	91.7	103.2	105.4	101.1	108.7	95.8	96.7	97.8	100.6	103.9	103.1
A0A2I4HUW4	Phosphoribosylamine--glycine ligase OS=Juglans regia OX=51240 GN=LOC109021685 PE=3 SV=1	8	3	5	3	532	56.2	5.86	16.29	86.2	84	84.4	86.9	82.2	78.6	112.7	113.7	108.6	121.4	120.4	120.9
A0A833Y3D5	Acetyl-CoA carboxytransferase OS=Juglans regia OX=51240 GN=F2P56_007945 PE=3 SV=1	9	5	10	1	783	88	7.27	31.05	108.3	109.6	113.7	123.3	120.1	116.9	83.5	78.8	75.7	79.1	91.7	99.4
A0A2I4H3W5	bifunctional aspartate aminotransferase and glutamate/aspartate-prephenate aminotransferase-like OS=Juglans regia OX=51240 GN=LOC109013250 PE=3 SV=1	7	3	6	1	482	51.8	8.18	19.04	42.1	37.7	31.9	49.9	46.2	48.8	150.3	141.8	147.5	170.2	168.2	165.4
A0A6P9EE79	acyl-coenzyme A oxidase 4, peroxisomal isoform X2 OS=Juglans regia OX=51240 GN=LOC108995162 PE=3 SV=1	6	3	4	3	376	41	8.97	16.69	106	88.7	94.1	85.9	78.2	95	102.1	92.1	90	119.6	128.1	120.2
A0A2I4G258	Germin-like protein OS=Juglans regia OX=51240 GN=LOC109004037 PE=3 SV=1	20	4	7	4	217	22.7	8.75	21.66	30.8	32.3	30.3	27.3	31.3	31.5	196.8	205	180.2	155	143.4	136.2
A0A833YDK5	Uncharacterized protein OS=Juglans regia OX=51240 GN=F2P56_001653 PE=3 SV=1	19	5	10	1	230	26.1	5.67	19.17	68.8	59.1	65.4	66.3	73	66.6	134.9	124.2	126.7	137.1	134	143.8
A0A833UKA3	Uncharacterized protein (Fragment) OS=Juglans regia OX=51240 GN=F2P56_028322 PE=4 SV=1	15	3	5	1	239	26	6.21	15.8	116.7	114.1	111.8	108.1	99.2	104	98.2	86.8	92.8	89.6	89.2	89.6
A0A2I4E1A0	vesicle-associated protein 1-2-like OS=Juglans regia OX=51240 GN=LOC108985350 PE=4 SV=2	19	5	7	2	265	29.2	8.65	19.86	140.3	128.1	139.1	138.9	131.7	127.7	62.3	62.9	65.3	67.9	68.9	66.9
A0A2I4GW66	Transaldolase OS=Juglans regia OX=51240 GN=LOC109011398 PE=3 SV=1	9	5	11	5	397	43.2	6.57	30.5	110.9	116.5	118.4	117.5	122.8	122.3	93.9	90.9	86.7	79.4	71.1	69.6
A0A2I4GSH9	RAN GTPase-activating protein 2 OS=Juglans regia OX=51240 GN=LOC109010462 PE=4 SV=1	9	4	6	3	539	58.9	4.74	18.01	77.1	77.9	75.3	86.1	85.9	86.6	116.8	121.7	116.7	117	117.9	121
A0A2I4FBV7	ankyrin repeat domain-containing protein 2B-like OS=Juglans regia OX=51240 GN=LOC108997371 PE=4 SV=1	12	4	10	1	351	37.7	4.64	28.3	99.4	104.7	95.1	108.3	123.7	119.6	91.1	86.4	93.8	94.1	95.4	88.4
A0A2I4HSW5	Phytochrome OS=Juglans regia OX=51240 GN=LOC109021135 PE=3 SV=1	6	5	5	4	1124	124.4	6.16	16.39	66.1	68.6	74.3	68.8	66.3	69.8	142.5	136.3	136.2	117.6	125.5	128
A0A2I4H5B9	Acetohydroxy-acid synthase small subunit OS=Juglans regia OX=51240 GN=LOC109013645 PE=3 SV=1	9	4	9	2	485	53.4	9.14	27.07	125.8	128.9	115.2	126.5	128	129	73.3	75.4	74.8	75.1	74.6	73.4
A0A2I4EZ87	65-kDa microtubule-associated protein 1-like OS=Juglans regia OX=51240 GN=LOC108994074 PE=3 SV=1	8	4	5	3	584	65.5	5.11	17.54	39.8	40.9	42.7	41.8	40.1	40.8	161.2	159.1	161.3	153.4	160.5	158.4
A0A2I4HQA6	Small nuclear ribonucleoprotein Sm D2 OS=Juglans regia OX=51240 GN=LOC109020313 PE=3 SV=1	34	4	13	4	109	12.5	9.86	29.23	79.7	83.7	78.6	85.5	81.3	82	117.2	114	111.2	124	118.4	124.2
A0A2I4FGA9	Choline-phosphate cytidylyltransferase OS=Juglans regia OX=51240 GN=LOC108998563 PE=3 SV=1	18	5	7	2	319	37.4	5.1	20.93	127.5	126.4	133.6	138.2	129.1	133.5	67.7	64	75.2	65.8	70.9	68
A0A2I4G2S8	mitochondrial uncoupling protein 1-like OS=Juglans regia OX=51240 GN=LOC109004201 PE=3 SV=1	17	5	10	5	305	32.4	9.55	29.95	112.3	114.1	110.8	112.5	112.8	108.3	84.9	84.6	84.1	89.2	92.3	94.1
A0A2I4GXX6	Indole-3-glycerol-phosphate synthase OS=Juglans regia OX=51240 GN=LOC109011861 PE=3 SV=1	9	3	5	3	397	43.8	8.27	15.99	102.6	104.6	102.9	111.6	101.3	104.8	92.2	90.3	97.1	98.8	89.4	104.5
A0A834CPU4	Uncharacterized protein OS=Juglans regia OX=51240 GN=F2P56_017127 PE=4 SV=1	9	2	15	1	416	45.7	5.57	47.66	97.3	98.2	103.8	94.8	76.7	83.8	96.5	99.2	98.3	96.6	129.9	125
A0A2I4EH34	WD-40 repeat-containing protein MSI1-like OS=Juglans regia OX=51240 GN=LOC108989531 PE=3 SV=1	15	5	5	5	423	48.1	4.87	16.83	82.4	86.2	87.2	83.4	78.3	84.6	100.9	109.1	108.9	123.6	123.5	132.1
A0A2I4F786	S-methyl-5-thioribose kinase OS=Juglans regia OX=51240 GN=LOC108996191 PE=3 SV=1	12	5	10	5	417	47.7	6.54	30.61	47.9	49	51.9	58.5	56.7	60.3	139.2	142.9	139.2	149.7	152.7	152
A0A2I4FRC7	histidine--tRNA ligase, cytoplasmic OS=Juglans regia OX=51240 GN=LOC109001402 PE=3 SV=2	7	5	5	5	876	97	6.6	15.61	92.8	97.4	91.6	95.5	93.6	93.8	104.3	104.9	102.3	107.7	109.8	106.3
A0A2I4EQM6	Anthranilate synthase OS=Juglans regia OX=51240 GN=LOC108991762 PE=3 SV=1	7	3	5	2	587	65.7	6.95	16.18	78.2	77.3	81.1	86.2	83.5	77.3	113.8	116	118.8	125.5	116.1	126
A0A2I4HT26	protein SABRE isoform X1 OS=Juglans regia OX=51240 GN=LOC109021173 PE=4 SV=2	2	6	7	6	2635	295.4	8.46	14.6	155.8	154.2	162	144.5	134.8	145.1	48.8	47	48.5	55.2	52	52.1
A0A2I4ENL5	GLABRA2 expression modulator-like OS=Juglans regia OX=51240 GN=LOC108991264 PE=3 SV=1	14	4	8	3	293	32.2	6.07	20.69	96.9	94.5	93.6	90.7	99.9	94.1	119.8	117.4	114.2	92.4	93.5	93
A0A833XA99	Uncharacterized protein OS=Juglans regia OX=51240 GN=F2P56_023431 PE=4 SV=1	6	4	6	3	725	80.4	5.99	19.74	217.7	208.6	215.6	160.2	156.2	158.7	7.8	10.3	15.2	16.3	16.8	16.5
A0A6P9ESW0	CLIP-associated protein-like isoform X2 OS=Juglans regia OX=51240 GN=LOC109021584 PE=4 SV=1	6	6	6	6	1430	157.8	6.86	14.67	62.9	63	73.3	67.6	69.4	77.3	139.9	130	139.4	124.4	124.7	128
A0A2I4GFH3	NADH-cytochrome b5 reductase OS=Juglans regia OX=51240 GN=LOC109007432 PE=3 SV=1	13	3	7	3	278	31	8.56	19.97	57.4	56.3	57.8	64.1	67.3	63.5	112.8	116.3	111.6	167	164.6	161.4
A0A2I4F5J0	GTP cyclohydrolase II OS=Juglans regia OX=51240 GN=LOC108995744 PE=3 SV=1	11	4	4	4	520	56.2	5.81	14.87	112.2	114.4	119.5	131.4	133.4	131.2	74.6	75.6	75.5	78.1	75.8	78.1
A0A2I4EZS4	glycine-rich RNA-binding protein 3, mitochondrial-like OS=Juglans regia OX=51240 GN=LOC108994219 PE=4 SV=1	9	1	2	1	315	31.2	4.81	12.36	107.3	102	95.4	121.1	144.9	150.5	67.9	64.3	85.7	81.1	82.7	97.2
A0A833TLK5	PPR_long domain-containing protein OS=Juglans regia OX=51240 GN=F2P56_037060 PE=3 SV=1	5	3	5	3	640	72.7	7.49	15.75	104.5	106.2	98	186.6	185.2	174.6	51	49.3	62.2	61.8	59.4	61.2
A0A2I4GB63	12-oxophytodienoate reductase 2-like OS=Juglans regia OX=51240 GN=LOC109006345 PE=3 SV=2	13	4	9	4	370	41.2	6.89	17.47	114.3	118.6	114.6	138.7	135.2	127.1	67.2	66.2	80	79.1	75.1	83.8
G8D4I4	Ribulose bisphosphate carboxylase large chain (Fragment) OS=Carya cordiformis OX=139928 GN=rbcL PE=3 SV=1	23	5	11	1	202	22.3	6.57	33.21	28.8	23.5	22	19.1	22	25.2	149.3	160.7	151.7	189.6	209.8	198.4
A0A2I4EXF5	Tryptophan synthase OS=Juglans regia OX=51240 GN=LOC108993551 PE=3 SV=1	9	4	4	4	462	50.4	7.31	13.8	134.9	127	134.6	144.6	152.3	152.7	59.8	55.8	61.9	62.9	56	57.5
A0A2I4DRA0	Proline--tRNA ligase OS=Juglans regia OX=51240 GN=LOC108982683 PE=3 SV=1	8	3	4	3	557	62.5	7.06	13.46	90.3	85.7	88.3	87.9	92.6	88.2	118.7	114.3	110.4	102.8	103.4	117.3
A0A2I4F1H3	Protein VACUOLELESS1 OS=Juglans regia OX=51240 GN=LOC108994650 PE=3 SV=1	5	4	5	4	849	95.1	6.38	17.32	73.4	80.6	84.2	79.4	75.2	72	130	131.2	119.7	117	117	120.3
A0A2I4HQ84	60S ribosomal protein L22-2-like OS=Juglans regia OX=51240 GN=LOC109020322 PE=3 SV=1	24	3	16	1	125	14.1	9.55	37.97
A0A2I4FS16	40S ribosomal protein S2-4-like OS=Juglans regia OX=51240 GN=LOC109001546 PE=3 SV=1	19	6	10	3	268	29.6	10.3	26.52	138.6	132.1	132	124.2	134.6	127.5	47.4	48.4	53.6	91.2	84	86.4
A0A2I4EKS7	autophagy-related protein 3 OS=Juglans regia OX=51240 GN=LOC108990471 PE=4 SV=1	22	4	5	3	313	35.4	4.89	17.38	123.4	122.6	119.9	131.5	139.9	125.5	66.5	71.1	75.4	68.4	77	79
A0A2I4HHF0	Serine/threonine-protein phosphatase OS=Juglans regia OX=51240 GN=LOC109017858 PE=3 SV=1	19	6	9	2	303	34.7	5.34	22.33	102.7	97.8	105.5	111.5	98.5	107.2	98.5	81.2	94.9	107.1	90.4	104.8
A0A2I4F7R6	Acetate--CoA ligase OS=Juglans regia OX=51240 GN=LOC108996314 PE=3 SV=1	8	5	8	5	703	78.3	6.06	22.78	110.9	112.8	112.7	102.1	108.3	104.4	88.6	85.7	84	96.5	94.6	99.3
A0A2I4HKI3	Profilin OS=Juglans regia OX=51240 GN=LOC109018861 PE=3 SV=1	10	1	22	1	133	14.3	5.2	63.25	132	134	129.8	128.9	129	129.6	69.8	68.9	70.8	70.2	68.8	68.2
A0A2I4FA68	eukaryotic translation initiation factor 2 subunit beta-like OS=Juglans regia OX=51240 GN=LOC108996944 PE=3 SV=1	18	7	10	7	269	30	5.86	24.64	111.5	110.8	111.2	152.9	151.5	146.1	67.7	67.5	66.1	71.4	71.1	72.2
A0A2I4GV42	40S ribosomal protein S6 OS=Juglans regia OX=51240 GN=LOC109011147 PE=3 SV=1	22	6	10	1	249	28.3	10.68	22.87	156	181.1	169.3	148.3	144.9	134.5	41.4	47.3	55.4	47.1	35.6	39.1
A0A2I4DWG1	mitochondrial carnitine/acylcarnitine carrier-like protein OS=Juglans regia OX=51240 GN=LOC108984095 PE=3 SV=1	8	2	3	2	297	30.6	9.57	13.32	76.8	82.8	86.8	82.1	79.8	73.7	116.7	112.1	115.4	118	128.7	127
A0A2I4EEI5	Leucine--tRNA ligase OS=Juglans regia OX=51240 GN=LOC108988877 PE=3 SV=1	3	3	7	3	1087	122.8	6.07	23.7	97.5	96.9	98	93.2	91.6	92.2	109.3	109	108.5	102.1	101.7	99.8
A0A6P9ET79	Phospho-2-dehydro-3-deoxyheptonate aldolase OS=Juglans regia OX=51240 GN=LOC109014560 PE=3 SV=1	10	2	3	1	307	33.8	7.02	12.14	71.3	59.9	48.4	71.5	65.9	73	126.6	119	116.7	160.8	127.8	159.2
A0A2I4H8J7	Glutathione peroxidase OS=Juglans regia OX=51240 GN=LOC109014459 PE=3 SV=1	13	4	12	4	238	26.3	9.1	32.27	101.8	104.1	101.6	213.3	225.2	217	31.9	31.2	39.9	46	43.6	44.3
A0A2I4GTJ7	Ribonucloprotein OS=Juglans regia OX=51240 GN=LOC109010760 PE=3 SV=1	25	2	3	1	128	13.9	7.12	13.35	62.2	59.9	64	94.5	92.4	92.6	104.4	110	109.7	135.1	137.7	137.5
A0A2I4FC87	Glutamate--cysteine ligase, chloroplastic OS=Juglans regia OX=51240 GN=LOC108997432 PE=3 SV=1	10	5	8	5	526	59.2	7.62	17.37	79.6	87.6	80.5	91.3	88.9	86.4	118.5	112.8	116.9	114.6	113.4	109.6
A0A833XYG4	PfkB domain-containing protein OS=Juglans regia OX=51240 GN=F2P56_001092 PE=3 SV=1	12	4	10	3	415	45.2	5.99	31.88	172.1	172.8	173.8	162	156.4	159.6	29.2	30	33.2	34.3	37.7	38.9
A0A2I4DKF0	Phospholipase D OS=Juglans regia OX=51240 GN=LOC108981014 PE=3 SV=2	7	5	8	5	847	96	7.34	21.86	94.7	93.2	94.6	81.5	86.3	86.4	113.7	108.3	112.6	111	109.3	108.3
A0A2I4FNJ2	UDP-glucuronate 4-epimerase 1 OS=Juglans regia OX=51240 GN=LOC109000715 PE=4 SV=1	7	3	5	2	431	47.6	9.6	17.79	175.8	154.7	160.7	143.3	150.2	152.7	45.7	47.2	48.1	41.2	40.1	40.3
A0A2I4G1A8	endoplasmic reticulum-Golgi intermediate compartment protein 3-like isoform X3 OS=Juglans regia OX=51240 GN=LOC109003827 PE=4 SV=1	11	3	5	3	347	39	6.39	16.87	79.2	79.4	81.6	62	60.8	62.4	130.8	131.7	134.8	125.7	128.3	123.3
A0A2I4GKB9	3-isopropylmalate dehydrogenase OS=Juglans regia OX=51240 GN=LOC109008627 PE=3 SV=2	11	4	8	4	408	43.8	6.44	22.49	71.7	75.1	72.7	81.4	86.1	82.5	120.2	123.4	120.7	126.3	121.1	118.9
A0A2I4EV90	osmotin-like protein OS=Juglans regia OX=51240 GN=LOC108993002 PE=3 SV=1	13	3	5	3	263	28.5	7.75	15.24	25.6	28	28.7	27.8	28.2	22.4	105.6	106.5	94.2	239.6	247.6	245.8
A0A2I4GF29	Branched-chain-amino-acid aminotransferase OS=Juglans regia OX=51240 GN=LOC109007327 PE=3 SV=1	12	5	10	5	418	45.7	7.01	24.87	110.8	111.9	115.4	121.9	118.5	116.3	79.5	76.4	77.8	87.8	90.1	93.7
A0A2I4H3J1	heat shock 70 kDa protein 16-like isoform X2 OS=Juglans regia OX=51240 GN=LOC109013165 PE=4 SV=1	7	4	4	3	781	87.5	6	16.11	104.4	121.2	132.3	123.5	111	114.4	79.6	77.1	88.3	87.9	78	82.2
A0A2I4EJY6	solanesyl diphosphate synthase 3, chloroplastic/mitochondrial-like OS=Juglans regia OX=51240 GN=LOC108990258 PE=3 SV=1	10	4	7	1	419	46.4	7.85	19.14	174.4	173	171.3	207	187.5	195.5	9.8	7.1	19	20.8	16.9	17.6
A0A6P9F6N8	ABC transporter D family member 1-like isoform X1 OS=Juglans regia OX=51240 GN=LOC109001572 PE=4 SV=1	4	4	5	4	1369	153.4	8.95	14.61	138.6	125	133.9	128.1	118.5	118.5	75.1	67.9	67.6	75.2	78.6	73
A0A2I4EAG7	Hexosyltransferase OS=Juglans regia OX=51240 GN=LOC108987821 PE=3 SV=2	6	4	9	1	611	70.4	7.65	20.25	20	17.7	21.8	23.3	25.4	24.6	165.7	162.5	153.6	186.3	197.8	201.2
A0A2I4FC21	NPC intracellular cholesterol transporter 1-like OS=Juglans regia OX=51240 GN=LOC108997405 PE=3 SV=1	5	5	8	4	1295	141.3	5.24	18.19	67	65.7	64.4	70.8	69	70.5	137.9	134	132.3	128.2	130.2	130
A0A2I4GFT0	nascent polypeptide-associated complex subunit alpha-like protein 2 OS=Juglans regia OX=51240 GN=LOC109007524 PE=4 SV=1	14	2	8	1	221	24.3	4.51	22.59	106.1	107.1	109.5	140.7	133.9	140.7	72.8	78.6	69.3	73.4	88	79.8
A0A2I4H8I9	oxalate--CoA ligase-like OS=Juglans regia OX=51240 GN=LOC109014451 PE=3 SV=1	7	3	5	3	524	56.4	6.84	14.26	135.6	140	142.6	201.2	183.8	189.7	28.8	26.7	34.1	38.4	40.6	38.5
A0A2I4FV60	Methionine aminopeptidase 2 OS=Juglans regia OX=51240 GN=LOC109002308 PE=3 SV=1	13	5	7	5	431	48.6	5.94	19.55	96.8	94.8	95.2	93.9	90.3	91.4	98.1	94.5	93.7	116.8	116.7	117.9
A0A2I4DY30	L-ascorbate oxidase homolog OS=Juglans regia OX=51240 GN=LOC108984516 PE=3 SV=2	11	5	10	3	547	60.4	8.79	25	137.1	130.1	123.4	104.7	111	108.7	102.6	102.2	95.7	62.9	60.2	61.4
A0A2I4DN12	FT-interacting protein 3 OS=Juglans regia OX=51240 GN=LOC108981746 PE=3 SV=1	10	7	8	2	776	89.3	9.09	16.65	31.2	35.2	37.3	30.6	36.2	33	161.8	155.9	159.6	171.6	178.5	169.1
A0A2I4EYQ2	Signal recognition particle subunit SRP68 OS=Juglans regia OX=51240 GN=LOC108993924 PE=3 SV=1	8	5	6	5	594	67.9	9.04	19.11	110.6	107.3	110.2	111.1	110.7	106.7	90.2	82.8	85.6	99.1	93.9	91.9
A0A833XY22	Adenylyl-sulfate kinase OS=Juglans regia OX=51240 GN=F2P56_005669 PE=3 SV=1	10	2	5	2	240	26.6	7.84	14.96	174.5	171.8	165.3	161.3	165.1	173	23.6	28.7	33.8	36	34.1	32.9
A0A2I4H1C4	Eukaryotic translation initiation factor 4C OS=Juglans regia OX=51240 GN=LOC109012652 PE=3 SV=1	30	4	12	4	142	16.2	5.15	31.3	166.8	163.7	156.3	128	125.7	130.4	50.6	52.5	56.9	54.5	58	56.5
A0A833WCP8	Uncharacterized protein (Fragment) OS=Juglans regia OX=51240 GN=F2P56_036448 PE=3 SV=1	7	2	4	2	395	43.7	8.19	13.85	87.4	92.5	87.8	117.3	109.3	111	92.2	90.7	95.7	107.5	103.5	105.1
A0A2I4GVZ3	UDP-glucuronate 4-epimerase 3 OS=Juglans regia OX=51240 GN=LOC109011356 PE=4 SV=1	5	3	7	1	438	48.6	9.95	22.49	189.3	185	180.6	153.8	144.1	144.8	32.8	32.7	36.7	34.3	30.5	35.5
A0A6P9FAG0	Serine/threonine-protein phosphatase OS=Juglans regia OX=51240 GN=LOC109012694 PE=3 SV=1	11	4	8	1	323	36.4	5.38	21.61	138.4	129.8	122.9	145.1	141.1	143.8	70.5	64.9	70.7	54.9	58.1	59.7
A0A2I4EUX0	integrin-linked protein kinase 1-like isoform X1 OS=Juglans regia OX=51240 GN=LOC108992918 PE=3 SV=1	15	7	11	1	440	49.7	8.37	25.16	76.5	72.9	102.1	89.2	77.4	79.2	135.3	138.4	91.3	120.7	104.1	113
A0A2I4EUL6	Carbonic anhydrase OS=Juglans regia OX=51240 GN=LOC108992857 PE=3 SV=1	8	2	6	1	335	36.4	7.43	19.45	145.9	143.7	139.1	163.8	164.8	155	47	49	48.6	45.2	50.6	47.2
A0A2I4FV64	dnaJ homolog subfamily C member 2-like OS=Juglans regia OX=51240 GN=LOC109002309 PE=4 SV=1	7	4	4	4	648	74.1	8.15	13.68	120.5	126.4	131.6	136.8	149.2	141.1	57.9	60.6	66.2	70.2	68.1	71.3
A0A6P9EAL7	beta-glucosidase BoGH3B-like OS=Juglans regia OX=51240 GN=LOC108997882 PE=4 SV=1	10	4	6	1	636	69.5	8.44	16.9	18.5	27.5	13.1	20.7	17.9	17.8	184.2	200.4	205.3	146.7	171.3	176.6
A0A2I4F7M7	ras-related protein RABA5b-like OS=Juglans regia OX=51240 GN=LOC108996293 PE=4 SV=2	20	4	7	1	214	23.7	5.22	20.58	79.3	111	77.7	80.5	80.4	62.4	131.3	123	121.9	98.7	127.7	106.2
A0A2I4DWK6	calcium-dependent protein kinase 2-like OS=Juglans regia OX=51240 GN=LOC108984131 PE=4 SV=1	7	3	7	3	534	60.1	6.4	18.25	33.5	35.7	34.9	36.5	38	38.9	182.2	183.2	175.7	142.4	149.6	149.4
A0A2I4GXZ1	transmembrane emp24 domain-containing protein p24beta2 OS=Juglans regia OX=51240 GN=LOC109011863 PE=3 SV=1	10	1	3	1	214	24.7	5.9	18.1	116.7	110.4	118.4	120.9	112.3	116.4	86.3	82.1	86.4	81	84.4	84.7
A0A2I4DKI0	subtilisin-like protease SBT1.7 OS=Juglans regia OX=51240 GN=LOC108981048 PE=3 SV=2	6	3	6	3	767	80.7	6.49	19.78	35.4	38.4	37.8	39.5	41.2	40.1	166.4	159.9	160	155.3	164.9	161.2
A0A2I4E0F0	probable clathrin assembly protein At4g32285 OS=Juglans regia OX=51240 GN=LOC108985146 PE=4 SV=1	5	3	6	3	660	72.2	5.67	19.16	60.6	58.5	62.6	73.9	68.9	69.8	164.8	162.5	165.2	107.1	102.5	103.6
A0A2I4HR88	signal recognition particle receptor subunit alpha homolog OS=Juglans regia OX=51240 GN=LOC109020615 PE=3 SV=1	7	5	7	5	624	68.7	7.75	19.91	144.6	137.4	148.7	136.4	130.1	139.2	62.1	59.4	67.9	61.6	55.8	56.7
A0A2I4GXW7	acetyl-CoA acetyltransferase, cytosolic 1 isoform X2 OS=Juglans regia OX=51240 GN=LOC109011858 PE=3 SV=1	7	4	6	4	408	41.3	6.87	18.24	121.4	120.9	121.4	140	140	138.7	68.3	68.2	72.4	65.1	69.3	74.3
A0A2I4GHD9	eukaryotic peptide chain release factor subunit 1-3 OS=Juglans regia OX=51240 GN=LOC109007891 PE=3 SV=1	11	5	9	1	437	49.1	5.71	17.77	124.7	102.9	91.5	131.8	105.4	110.6	86.6	86	103.7	87.7	80.8	88.2
A0A2I4GKW8	omega-amidase, chloroplastic OS=Juglans regia OX=51240 GN=LOC109008778 PE=4 SV=2	8	3	4	3	397	43.4	7.69	16.24	86.7	79.3	84.5	72.9	69.9	71.9	118	115.5	124.8	122.8	130.4	123.3
A0A2I4GV21	Small ubiquitin-related modifier OS=Juglans regia OX=51240 GN=LOC109011119 PE=3 SV=1	33	4	7	1	103	11.5	5.1	22.92	48.6	50.6	54.4	55.4	51.5	52.6	144.5	135.9	140.8	156.8	150.9	157.9
A0A2I4DRH3	cullin-4-like OS=Juglans regia OX=51240 GN=LOC108982749 PE=3 SV=1	7	5	6	5	827	94.4	8.09	18.44	94.6	94.3	91.8	91.6	91.1	88.9	101.4	101.7	104	108.7	117.3	114.6
A0A2I4DLT0	40S ribosomal protein S12 OS=Juglans regia OX=51240 GN=LOC108981396 PE=3 SV=1	14	3	8	2	140	15	6.19	26.87	139	128.4	137.4	152.8	173.2	158.4	53.2	43.4	61.3	49.8	55.5	47.6
A0A2I4FWA7	Cysteine desulfurase OS=Juglans regia OX=51240 GN=LOC109002577 PE=3 SV=1	15	6	10	6	466	51.2	6.9	20.55	116.3	121.2	120.9	137.7	126.3	125.3	74	73.8	72.9	76.9	76.2	78.5
A0A6P9E5X5	Hexosyltransferase OS=Juglans regia OX=51240 GN=LOC108990476 PE=3 SV=1	5	4	7	1	639	73.7	7.59	17.98	15.5	17	15.9	14.8	15.5	15.7	181.7	178.8	174.3	189.2	185.3	196.4
A0A2I4F4J9	Geranylgeranyl diphosphate reductase OS=Juglans regia OX=51240 GN=LOC108995457 PE=3 SV=1	9	3	5	3	464	50.9	9.14	10.47	52.5	62.3	60.7	57.4	60	50.4	124.5	117.6	124	169.3	158.8	162.3
A0A2I4DTW4	probable protein phosphatase 2C 33 OS=Juglans regia OX=51240 GN=LOC108983394 PE=4 SV=1	13	5	6	4	491	54.4	5.67	13.92	107.2	110.1	111.5	118.1	119.6	122	92.1	99.8	101.4	69.1	72.4	76.6
A0A2I4FS06	ATP synthase subunit O, mitochondrial-like OS=Juglans regia OX=51240 GN=LOC109001540 PE=3 SV=1	6	2	5	2	243	26.9	9.48	17.26	107.9	108	106.7	127.2	119.3	129.7	82.3	83.1	86	81	85.7	83.2
A0A2I4HBU3	Non-specific serine/threonine protein kinase OS=Juglans regia OX=51240 GN=LOC109015605 PE=3 SV=1	12	6	7	6	489	54.4	7.72	16.86	126.6	132.8	131.2	122.6	120.8	124.9	76.5	72.7	82	68.9	71.3	69.7
A0A6P9DWE8	mRNA-decapping enzyme subunit 2-like OS=Juglans regia OX=51240 GN=LOC109008975 PE=3 SV=1	11	3	5	3	328	36.9	6.57	17.19	67.3	72.7	73.3	73.2	76.7	70.6	126.6	126.2	125	123.6	131.3	133.4
A0A2I4EC20	Eukaryotic translation initiation factor 3 subunit M OS=Juglans regia OX=51240 GN=LOC108988218 PE=3 SV=1	7	2	4	2	410	46.2	5.11	14.01	85.4	88.3	83.7	105.3	107.6	102.1	89.4	97.1	99.1	104.4	118.9	118.6
A0A2I4GUZ6	peptidyl serine alpha-galactosyltransferase OS=Juglans regia OX=51240 GN=LOC109011072 PE=4 SV=1	6	4	5	4	807	92	7.85	14.63	127.1	128.6	122.4	111.6	112.1	117.7	81.1	75.4	75.3	81.8	82.9	84
A0A2I4E2R3	cell division protein FtsZ homolog 2-2, chloroplastic OS=Juglans regia OX=51240 GN=LOC108985721 PE=3 SV=1	11	4	5	4	485	51.3	6.43	15.69	75.2	73.2	76.3	73.1	74.8	73.1	129.4	132.6	122.3	118.8	124.9	126.2
A0A833XEJ8	Uncharacterized protein (Fragment) OS=Juglans regia OX=51240 GN=F2P56_015257 PE=4 SV=1	15	5	8	2	258	28.7	5.11	22.21	24.6	26.6	25.9	30.6	26.2	28.1	196.7	203.8	196.7	144.4	144.9	151.6
A0A2I4DL97	glycine-rich cell wall structural protein-like OS=Juglans regia OX=51240 GN=LOC108981265 PE=4 SV=1	20	2	11	2	454	35.3	10.61	28.42	211.4	190.5	225	135.9	150.6	146	30.8	28.8	32.4	17.8	15	15.8
A0A2I4EUR2	mannose-1-phosphate guanyltransferase alpha-like OS=Juglans regia OX=51240 GN=LOC108992887 PE=4 SV=1	9	3	4	1	415	45.8	6.47	13.19	76.8	82.3	73.7	71.1	81.6	67.6	133.1	134.6	124.4	110.7	127.5	116.6
A0A834CNT3	Glutathione reductase OS=Juglans regia OX=51240 GN=F2P56_015016 PE=3 SV=1	9	5	11	1	503	54.2	6.01	30.19	88.8	86.9	88	82.4	79.6	83.1	109	105.2	108.7	114.8	123.6	129.8
A0A833Y144	FAD-binding PCMH-type domain-containing protein OS=Juglans regia OX=51240 GN=F2P56_007217 PE=3 SV=1	2	2	7	2	532	60	7.74	21.75	171.3	176.3	164.2	120.6	121.7	125.1	64	62.1	72.4	41.6	39.7	41
A0A2I4ERF3	Peroxidase OS=Juglans regia OX=51240 GN=LOC108991997 PE=3 SV=2	15	4	8	4	332	36.5	9	15.58	56.7	54.2	54.9	57	56.8	58.3	149.8	154.2	140	143.3	138	136.6
A0A2I4EWT3	heterogeneous nuclear ribonucleoprotein 1-like isoform X2 OS=Juglans regia OX=51240 GN=LOC108993403 PE=4 SV=1	6	2	3	2	483	51.1	8.54	11.15	112.6	108	98.4	122.1	121.3	117	100.7	90.6	85.7	76.5	85.7	81.4
A0A2I4FM92	putative GPI-anchor transamidase isoform X1 OS=Juglans regia OX=51240 GN=LOC109000368 PE=3 SV=1	9	3	5	3	404	46.7	6.42	15.58	117.1	109.3	121.1	116.4	114.9	115	81.2	88.8	80.7	82.7	88.3	84.5
A0A2I4F0A6	gamma carbonic anhydrase-like 2, mitochondrial OS=Juglans regia OX=51240 GN=LOC108994370 PE=4 SV=1	9	3	7	3	255	27.6	8.18	23.4	106.3	103.7	105.8	110.5	107.2	107.5	95.7	93	95.9	90.7	90.8	93
A0A2I4HQF2	chaperone protein dnaJ 50 OS=Juglans regia OX=51240 GN=LOC109020380 PE=4 SV=1	11	2	3	2	300	35	9.17	12.83	142	137.5	128.4	142.2	143.4	140.3	59	61	63.7	58.6	62.3	61.7
A0A834D9D0	M20_dimer domain-containing protein (Fragment) OS=Juglans regia OX=51240 GN=F2P56_002522 PE=3 SV=1	3	2	3	2	487	53.5	6.99	15.86	82.7	82	85.9	88.9	88	80	106.5	112	108.9	114.1	127.1	124
A0A2I4GJV1	Peptidylprolyl isomerase OS=Juglans regia OX=51240 GN=LOC109008515 PE=4 SV=1	9	1	6	1	155	16.6	8.25	20.09	139.2	134	134.2	150.7	146	148.5	59.1	55.4	56.8	58.3	57.8	59.9
A0A2I4FTL6	Thioredoxin reductase OS=Juglans regia OX=51240 GN=LOC109001926 PE=3 SV=1	11	2	4	2	394	41.7	8.15	12.59	103.1	103.8	108.7	105.2	105.4	103.9	82.2	92.2	88.7	97.8	105.7	103.2
A0A2I4E068	Calreticulin OS=Juglans regia OX=51240 GN=LOC108985082 PE=3 SV=1	10	4	7	4	421	49.3	5.91	19.45	47.6	47.8	49.6	49.9	47.3	47	158.8	160.6	158	143.6	144.2	145.6
A0A833X884	Uncharacterized protein OS=Juglans regia OX=51240 GN=F2P56_029268 PE=4 SV=1	9	4	4	4	573	63.4	5.6	7.71	95.6	92.9	97.7	98.5	99.3	97.5	92.5	93.6	100.3	104.8	116.1	111.1
A0A2I4EUJ6	2-methylene-furan-3-one reductase-like OS=Juglans regia OX=51240 GN=LOC108992834 PE=3 SV=1	12	3	5	2	323	34.5	5.83	13.83	27.7	29.3	27.8	35.7	36.5	34.2	167.1	167.3	175.9	159.6	169.9	168.9
A0A2I4EW09	Transmembrane 9 superfamily member OS=Juglans regia OX=51240 GN=LOC108993212 PE=3 SV=1	6	4	8	2	640	73.8	7.8	23.78	136.7	135.5	128.4	115.7	119.2	121	68.8	69.3	71.3	75.3	78.4	80.4
A0A2I4H2L2	3-deoxy-manno-octulosonate cytidylyltransferase, mitochondrial OS=Juglans regia OX=51240 GN=LOC109012948 PE=3 SV=1	14	3	6	3	303	33.4	6.93	17.47	66.3	64.5	71	67.7	65.4	68.5	130.4	135.3	127.3	128.5	135.3	139.8
A0A2I4EWL9	HECT-type E3 ubiquitin transferase OS=Juglans regia OX=51240 GN=LOC108993367 PE=3 SV=1	3	6	7	6	1894	203.1	6.24	13.52	92.1	97.5	98	100.7	103.3	104.6	101.5	98	100.4	103	102.9	98.1
A0A2I4GIC5	FT-interacting protein 3-like OS=Juglans regia OX=51240 GN=LOC109008109 PE=3 SV=1	9	7	7	2	774	89	9.01	15.57	54.5	55.2	56.5	58	56.8	57.9	149.9	145.5	141.2	145.2	140.4	138.9
A0A833Y5L0	Nascent polypeptide-associated complex subunit beta (Fragment) OS=Juglans regia OX=51240 GN=F2P56_000151 PE=3 SV=1	23	3	4	3	186	20.8	8.94	13.36	93.2	94.1	103.8	127.4	125.6	127.4	90.6	102.5	82	86.1	86.1	81.3
A0A2I4F0J3	nuclear transcription factor Y subunit C-1-like OS=Juglans regia OX=51240 GN=LOC108994406 PE=4 SV=1	17	4	7	3	226	24.8	5.54	19.51	101.3	103.5	98.4	144.6	139.8	134.6	79.5	79.2	81.5	78.6	77.5	81.5
A0A2I4E2D5	calcineurin B-like protein 3 OS=Juglans regia OX=51240 GN=LOC108985638 PE=3 SV=1	25	5	7	5	226	26	4.94	18.31	85.8	87.9	87.5	98.3	97.6	98.2	114	116.6	116.3	99.8	98.7	99.4
A0A2I4G5Y5	protein transport protein Sec24-like At4g32640 OS=Juglans regia OX=51240 GN=LOC109005014 PE=3 SV=1	4	4	9	4	1100	118.6	7.83	12.91	82.6	87	93.4	88.5	81	85	113.1	118.2	117	115.6	108.9	109.6
A0A2I4GV63	dnaJ protein P58IPK homolog OS=Juglans regia OX=51240 GN=LOC109011167 PE=4 SV=2	7	3	4	3	488	54	6.92	14.53	136.4	138	137.7	176.2	157.3	171.9	48.5	40.9	39.7	47.7	58.3	47.3
A0A2I4HNR4	28 kDa heat- and acid-stable phosphoprotein-like OS=Juglans regia OX=51240 GN=LOC109019873 PE=4 SV=1	10	2	3	2	162	18.7	6.37	10.86	78.7	76.1	75.8	185.6	176.6	167.3	64.6	64.5	79	72.5	80.1	79.3
A0A2I4GE94	phenylcoumaran benzylic ether reductase Betv6 OS=Juglans regia OX=51240 GN=LOC109007127 PE=4 SV=1	14	4	11	2	308	34.1	7.21	25.55	86.5	83.7	85	100.6	101.4	100	101.2	108.6	105.8	108.3	110.7	108.3
A0A6P9EW03	ISWI chromatin-remodeling complex ATPase CHR17 isoform X3 OS=Juglans regia OX=51240 GN=LOC108995062 PE=3 SV=1	7	7	7	7	1037	120.3	5.76	17.4	99.2	95	103	100.9	98.6	102.4	92.3	94.3	91.6	103	108.1	111.6
A0A6P9EYX4	dnaJ protein ERDJ3B-like OS=Juglans regia OX=51240 GN=LOC109008298 PE=4 SV=1	7	3	4	3	346	39.1	6.13	16.76	137.3	135.2	139.3	144.6	131.9	133.6	65	67.7	69.9	64.4	56.6	54.6
A0A6P9EG06	vacuolar protein sorting-associated protein 26A-like isoform X2 OS=Juglans regia OX=51240 GN=LOC109006950 PE=3 SV=1	17	4	6	2	263	31	5.76	17.66	65.1	68.7	67.8	67.8	65	63.4	136.1	139.3	138.1	129.6	133.6	125.4
A0A2I4FI45	H/ACA ribonucleoprotein complex subunit 4 OS=Juglans regia OX=51240 GN=LOC108999000 PE=3 SV=1	10	5	5	5	614	68.3	9.25	14.77	50.9	45.6	45	42.5	44.6	42.7	138.9	139.3	137.2	174.1	165.5	173.8
A0A6P9EUP4	probable mannitol dehydrogenase OS=Juglans regia OX=51240 GN=LOC108984582 PE=3 SV=1	8	4	8	4	363	39	6.4	21.98	151.7	141.6	140.4	157.4	154.6	155.4	48	55.4	57.5	44.2	46.9	46.8
A0A834CMD8	Uncharacterized protein OS=Juglans regia OX=51240 GN=F2P56_014079 PE=4 SV=1	27	3	4	3	154	17.1	5.3	16.12	84.8	81.2	79.8	98.1	89.7	89.5	108	113.7	120.9	106.3	116.9	111.2
A0A2I4DNX9	GEM-like protein 1 OS=Juglans regia OX=51240 GN=LOC108982031 PE=3 SV=1	12	3	6	2	301	32.6	6.23	13.29	109.2	110.8	105.9	133.2	128.6	126.6	92.4	83.6	86.3	76.8	73.7	72.8
A0A2I4FHP6	Conserved oligomeric Golgi complex subunit 3 OS=Juglans regia OX=51240 GN=LOC108998875 PE=3 SV=1	7	6	7	6	789	88.6	6.39	16.68	103.7	105.8	104	125.7	132.7	126.2	94.8	89.5	90.1	76.4	77.2	74.1
A0A2I4EJD0	serine/threonine-protein phosphatase 6 regulatory subunit 3-like isoform X1 OS=Juglans regia OX=51240 GN=LOC108990106 PE=3 SV=1	6	6	7	4	853	94.1	4.67	19.39	107	109.1	108.3	131	124.7	123.3	85.1	80	83	81.6	82.6	84.2
A0A833X6R7	Uncharacterized protein OS=Juglans regia OX=51240 GN=F2P56_017590 PE=4 SV=1	11	4	4	4	346	39	6.6	13.58	90.1	91.5	85.5	92.2	94.5	89.5	123.8	124.8	126.1	94	96.2	91.8
A0A2I4HMY5	UDP-glucose 4-epimerase OS=Juglans regia OX=51240 GN=LOC109019638 PE=3 SV=1	10	3	8	1	348	38.1	6.54	22.11	120.5	127.6	125.9	144.6	132.5	138.1	61.6	62.4	66.5	68.5	74	77.7
A0A2I4FP90	VAMP-like protein YKT61 OS=Juglans regia OX=51240 GN=LOC109000890 PE=3 SV=1	23	4	7	4	199	22.7	7.83	15.98	115.8	112.6	110.9	125.3	128.1	128.9	82.6	82.1	82.4	78.8	73.8	78.7
A0A2I4FNU2	uncharacterized protein LOC109000757 OS=Juglans regia OX=51240 GN=LOC109000757 PE=4 SV=2	6	4	5	4	573	65.7	5.57	14.65	79.7	82.6	84	77.5	78.3	81.9	119.2	133.6	124.3	111.2	112.1	115.5
A0A6P9EA46	accelerated cell death 11-like isoform X2 OS=Juglans regia OX=51240 GN=LOC108996579 PE=4 SV=1	15	2	4	2	177	19.2	7.97	14.32	101.8	100.6	101.9	127.4	111.1	125.5	76.6	77.7	79.3	95	100.3	103
A0A2I4DVD1	GDSL esterase/lipase APG-like OS=Juglans regia OX=51240 GN=LOC108983791 PE=3 SV=1	9	2	3	2	359	38.6	8.57	8.54	39	42.8	36.9	40.5	41.9	42.2	170.1	171.2	175.3	140.1	148.9	151
A0A6P9EM38	beta-fructofuranosidase, insoluble isoenzyme 1-like OS=Juglans regia OX=51240 GN=LOC109018686 PE=3 SV=1	6	3	6	3	571	64.3	8.09	20.71	158.3	158.5	160.7	143.3	138.9	141.2	44.8	46.1	46	53.4	55.1	53.7
A0A2I4EBL5	Alpha-1,4 glucan phosphorylase OS=Juglans regia OX=51240 GN=LOC108988119 PE=3 SV=1	5	4	5	4	990	111.8	5.29	14.76	90.7	97.5	108	97.9	105.4	106.1	95.2	95.1	103.6	94.6	102.1	103.9
A0A833U0G6	Uncharacterized protein OS=Juglans regia OX=51240 GN=F2P56_033678 PE=4 SV=1	6	5	6	2	859	97.7	8.44	12.02	21.5	21.8	21.9	21.4	18.9	20.5	186.2	176.2	181.9	177.1	176.1	176.4
A0A2I4E5N2	serine/threonine-protein kinase STY13-like OS=Juglans regia OX=51240 GN=LOC108986516 PE=4 SV=1	11	5	6	1	401	44.6	6.79	17	54.1	56	58.9	59.3	56.9	60.9	154.9	158	161.5	124.5	121.8	133.1
A0A2I4DSE0	mRNA cap-binding protein OS=Juglans regia OX=51240 GN=LOC108983011 PE=3 SV=1	7	1	4	1	197	22.7	6.8	12.81	109.7	106.3	102.2	108.5	105.2	104.5	95.7	95.2	90	102.5	86.7	93.5
A0A2I4E007	haloacid dehalogenase-like hydrolase domain-containing protein 3 OS=Juglans regia OX=51240 GN=LOC108985046 PE=4 SV=2	14	4	8	4	253	28.8	6.55	21.86	30.9	31.6	35	40	36.9	42.1	184	188.5	180.2	135.3	147.5	147.8
A0A2I4F5F9	beta-ureidopropionase-like OS=Juglans regia OX=51240 GN=LOC108995725 PE=4 SV=1	10	2	3	2	418	46.7	6.48	11.54	85.7	83.3	83.9	95.3	84.1	85	102.4	95.2	104.1	124.7	121.5	135
A0A2I4GFT7	caffeic acid 3-O-methyltransferase OS=Juglans regia OX=51240 GN=LOC109007527 PE=3 SV=1	6	2	19	2	365	39.7	5.67	53.38	13.9	13.8	14.3	15.1	14.6	16.2	157	153.6	153.1	209.1	222.2	217
A0A2I4FB00	serine/threonine-protein kinase STY13-like isoform X1 OS=Juglans regia OX=51240 GN=LOC108997136 PE=4 SV=1	18	7	8	4	365	41.1	7.37	20.14	70.8	74	75.8	63.9	61.8	65.6	144.3	132.5	135	126.9	124.6	124.8
A0A833U5I9	DUF3700 domain-containing protein OS=Juglans regia OX=51240 GN=F2P56_020830 PE=4 SV=1	11	2	3	2	224	24.7	6.77	10.98	21.8	21.1	21.9	19.5	22.3	20.9	167.7	165.2	164.4	195.4	191.9	188
A0A2I4GHJ8	60S ribosomal protein L36 OS=Juglans regia OX=51240 GN=LOC109007913 PE=3 SV=1	21	3	10	3	110	12.4	11.31	27.18	167.9	168.7	160.2	141.3	139.5	137	42.8	45.1	47.6	49.6	49.2	51
A0A2I4EKH7	low-temperature-induced cysteine proteinase-like OS=Juglans regia OX=51240 GN=LOC108990396 PE=3 SV=1	7	2	9	2	471	51.5	5.67	20.43	156.5	153.8	147.8	146.3	134.2	140.4	54.8	48.7	53.8	54.2	53.4	56
A0A2I4EIK3	Acyl-coenzyme A oxidase OS=Juglans regia OX=51240 GN=LOC108989910 PE=3 SV=1	9	7	14	1	664	74.4	7.5	30.07	105.3	113.9	128.6	81.8	95.1	98.8	93.3	101.2	100.3	103.2	88.3	90.4
A0A2I4GN26	60S ribosomal protein L13-1 OS=Juglans regia OX=51240 GN=LOC109009315 PE=3 SV=1	18	5	10	5	206	23.8	11.09	29.58	160.7	159	148.3	153.2	162	161	34.8	35	39.6	47.7	49.7	49.2
A0A834CNF4	Serine/threonine-protein phosphatase OS=Juglans regia OX=51240 GN=F2P56_015916 PE=3 SV=1	13	5	9	1	358	40.5	6.43	21.84	77.7	80.7	82.8	80.2	72.8	76.3	120.7	115.3	111.1	120	130.5	131.8
A0A833WZ67	Uncharacterized protein (Fragment) OS=Juglans regia OX=51240 GN=F2P56_027462 PE=3 SV=1	11	4	5	4	423	46.3	8.28	12.17	75.9	79.7	84.8	83	77.3	81.5	111.1	114.3	114.6	128.5	124.1	125.1
A0A2I4EIG6	6-phosphofructo-2-kinase/fructose-2, 6-bisphosphatase-like OS=Juglans regia OX=51240 GN=LOC108989881 PE=4 SV=1	6	4	5	2	758	84.5	6.65	11.66	129.9	132.5	137.5	133.5	122.9	128.8	64.8	62.5	69.9	68.6	75.8	73.3
A0A2I4DZ61	Ubiquinone biosynthesis O-methyltransferase, mitochondrial OS=Juglans regia OX=51240 GN=LOC108984831 PE=3 SV=1	5	1	2	1	317	35.2	7.28	10.66	114	118.7	125.8	155.5	130.4	147.3	61	57.8	54.4	73.4	84.7	77
A0A2I4GKM9	Inorganic diphosphatase OS=Juglans regia OX=51240 GN=LOC109008709 PE=3 SV=1	13	3	6	1	294	32.7	6.58	17.44	83	111.7	83.9	107.5	131.8	109.6	87.8	85.7	71.3	109	104	114.7
A0A2I4EXP0	Peptidyl-prolyl cis-trans isomerase OS=Juglans regia OX=51240 GN=LOC108993640 PE=3 SV=1	17	3	7	2	174	18.9	7.83	20.72	93.9	96.5	95.2	95.1	99.3	90.7	102	102.7	101.6	102.1	110.2	110.8
A0A2I4DUU1	uncharacterized membrane protein At1g16860-like OS=Juglans regia OX=51240 GN=LOC108983661 PE=4 SV=1	6	2	4	1	481	51.6	9.55	12.84	68.5	59.3	73.7	79	68	74.8	136.2	116.9	125.9	130.6	130.1	137.1
A0A2I4G1J6	pentatricopeptide repeat-containing protein At2g37230 OS=Juglans regia OX=51240 GN=LOC109003890 PE=4 SV=2	5	4	7	4	766	86.5	8.37	17.8	127	126.5	131.5	133.2	129.4	133.1	64	65.8	69.2	74.3	73.3	72.5
A0A2I4HVZ9	60S ribosomal protein L13a-4 OS=Juglans regia OX=51240 GN=LOC109021990 PE=3 SV=1	22	5	14	2	206	23.5	10.46	23.78	166.3	153.4	156.2	126.4	131.5	131.7	34.4	38	43.3	76.8	71.9	70
A0A2I4GJP8	RNA-binding protein 38-like isoform X3 OS=Juglans regia OX=51240 GN=LOC109008474 PE=4 SV=1	16	4	7	3	282	31.7	9.48	17.82	47	49.2	50.7	54.4	48.3	49.3	162	156.4	157.8	137	141.8	146
A0A2I4DY53	Prolyl endopeptidase OS=Juglans regia OX=51240 GN=LOC108984529 PE=3 SV=1	7	4	7	4	798	90.2	6.24	16.49	101.2	99	99.9	86.3	85.5	88	90.2	92.5	92.2	117.8	124	123.4
A0A6P9FAE7	Vacuolar protein sorting-associated protein 51 homolog OS=Juglans regia OX=51240 GN=LOC109009940 PE=3 SV=1	5	5	6	5	785	88.6	6.15	16.15	94.1	91.6	94.5	99.9	98.7	96.1	97.2	102	97.1	111.2	111	106.4
A0A2I4GNN1	thioredoxin-related transmembrane protein 2 OS=Juglans regia OX=51240 GN=LOC109009483 PE=4 SV=2	16	3	3	3	256	29.4	7.53	11.51	96	97.6	100.7	88.3	83.2	89.4	125.2	105.5	108.7	101.3	105.3	98.7
A0A833U1T9	Methylcrotonoyl-CoA carboxylase OS=Juglans regia OX=51240 GN=F2P56_028711 PE=3 SV=1	8	3	4	3	520	56.3	7.14	9.75	113.4	108.7	124.5	109.8	101.2	103.8	87.7	87.1	79.9	94.9	98.6	90.3
A0A2I4GJI4	selenium-binding protein 2-like OS=Juglans regia OX=51240 GN=LOC109008429 PE=3 SV=1	7	3	4	1	491	54.2	5.73	12.1	50.2	55.6	57.3	58.3	60.2	59.5	132.3	133.2	125	151.1	162.2	155.1
A0A2I4DE51	phosphomethylpyrimidine synthase, chloroplastic OS=Juglans regia OX=51240 GN=LOC108979240 PE=3 SV=1	10	5	6	5	648	71.7	6.15	10.72	77.3	84.3	81.5	117.1	109.1	115	81.4	82.2	80.9	121.9	125.5	124
A0A2I4EHU0	Carboxypeptidase OS=Juglans regia OX=51240 GN=LOC108989706 PE=3 SV=2	4	2	5	2	517	57.5	5.81	16.6	62.3	63	67	90.1	84.9	84.1	79.4	82.5	74	172.8	168.4	171.5
A0A2I4EBI5	uncharacterized protein LOC108988097 OS=Juglans regia OX=51240 GN=LOC108988097 PE=4 SV=1	2	5	5	5	2154	241.1	6.62	14.95	85.8	86.4	93.8	88.9	85.6	87.3	118	114.9	116.1	107	108.2	108
A0A6P9DVW1	protein argonaute 10-like isoform X2 OS=Juglans regia OX=51240 GN=LOC109005092 PE=3 SV=1	5	4	6	1	803	90.3	9.25	16.74	39.7	39.2	40.7	40.3	38	37.5	162.2	175.3	175	151.6	151	149.5
A0A2I4GFE7	Proliferating cell nuclear antigen OS=Juglans regia OX=51240 GN=LOC109007405 PE=3 SV=1	16	4	6	1	264	29.4	4.79	18.4	75.6	82.2	72.3	70.3	90.3	103.9	88.3	109.5	97.5	102.9	136.6	170.5
A0A2I4EM24	actin-related protein 3 OS=Juglans regia OX=51240 GN=LOC108990804 PE=3 SV=1	9	3	3	3	428	47.6	6.09	9.49	64.6	73.8	72.6	70	75.8	70.4	131	111.1	107.5	147.4	137.4	138.3
A0A2I4EEJ4	protein CYPRO4-like OS=Juglans regia OX=51240 GN=LOC108988887 PE=4 SV=1	5	2	3	2	643	71.4	6.04	11.59	116.8	106.3	108.7	127.3	116.3	130.3	81.2	89.2	90.2	76.6	80.2	76.7
A0A2I4FDG7	eukaryotic peptide chain release factor GTP-binding subunit ERF3A isoform X1 OS=Juglans regia OX=51240 GN=LOC108997765 PE=3 SV=1	10	5	10	5	519	58.1	5.68	25.5	111.4	114.1	111.9	109.3	105.4	106.4	95	95.1	97.4	89	85	80.2
A0A2I4EVQ9	eukaryotic translation initiation factor-like isoform X1 OS=Juglans regia OX=51240 GN=LOC108993151 PE=3 SV=1	6	4	5	2	793	87	7.84	11.96	107	107.9	112.3	124.4	118	118.3	82.9	83.3	92.4	78.6	89.7	85.3
A0A2I4HKD8	enoyl-CoA hydratase 2, peroxisomal OS=Juglans regia OX=51240 GN=LOC109018894 PE=4 SV=1	9	2	4	2	308	34.1	7.72	16.84	108.7	114	117.5	114.2	109.3	112.1	78.1	78.9	76.3	99.4	100.9	90.8
A0A2I4E4J4	Succinate dehydrogenase [ubiquinone] iron-sulfur subunit, mitochondrial OS=Juglans regia OX=51240 GN=LOC108986223 PE=3 SV=1	11	3	7	3	277	31.1	8.79	17.86	106.1	104.7	109.8	127.8	128	117.6	85.6	85.8	80.7	84.8	84.9	84.2
A0A833XVR3	Uncharacterized protein (Fragment) OS=Juglans regia OX=51240 GN=F2P56_011773 PE=3 SV=1	4	2	4	1	654	72.1	7.27	11.97	58.1	47	33.3	45.5	53.7	50.9	145.1	175.8	148.1	159.3	139.2	144
A0A3G1VTM7	Flavanone 3-hydroxylase OS=Juglans sigillata OX=224355 GN=F3H PE=2 SV=1	13	4	6	4	364	41	5.97	14.01	26.8	26.6	25.3	30.1	33.1	33.7	210.4	196.6	193.5	148	141.9	133.8
A0A2I4FYK2	60S ribosomal protein L17-2 OS=Juglans regia OX=51240 GN=LOC109003161 PE=3 SV=1	17	4	8	2	183	20.8	10.36	21.73	139.6	147.9	139	140.7	138.2	151.1	41.2	39	44.3	78.8	69.2	71
A0A2I4GYL7	universal stress protein PHOS32-like OS=Juglans regia OX=51240 GN=LOC109012032 PE=4 SV=1	12	3	6	3	162	18.1	6.55	14.08	20.8	22.5	21.8	24.4	22	21.7	164.8	163.5	166.1	185.1	191.8	195.5
A0A2I4HSW6	flowering locus K homology domain-like OS=Juglans regia OX=51240 GN=LOC109021136 PE=4 SV=1	13	5	8	5	461	48.9	5.3	20	87.6	82.2	89.7	92.5	94.7	98.2	106	107.6	99.8	111.5	116.6	113.6
A0A2I4E8L0	glyoxysomal fatty acid beta-oxidation multifunctional protein MFP-a-like OS=Juglans regia OX=51240 GN=LOC108987297 PE=3 SV=2	5	3	5	3	728	79.2	5.62	12.97	148.3	148.3	150.4	140.2	138.6	141.5	48.7	46.1	48	60.3	66.4	63.2
A0A6P9E544	Carbonic anhydrase OS=Juglans regia OX=51240 GN=LOC108986777 PE=3 SV=1	9	2	5	1	276	30.3	7.61	17.92	174.1	164.8	160.4	189.5	201.2	192.8	13.8	18.4	25.6	20.1	20.6	18.8
A0A6P9EHT5	Lon protease homolog 2, peroxisomal OS=Juglans regia OX=51240 GN=LOC109011450 PE=3 SV=1	7	5	5	5	889	98.3	7.24	12.8	100.1	114.6	101.6	117	111.8	105.9	90.7	101.2	89	91	88.3	88.8
A0A2I4G2T6	Peroxidase OS=Juglans regia OX=51240 GN=LOC109004171 PE=3 SV=1	8	2	6	2	330	35.8	8.57	16.63	38	38.5	40.5	32.6	37.6	36.9	177.5	182.3	176.4	140.5	152.5	146.6
A0A2I4EH87	ATPase family AAA domain-containing protein 3-like OS=Juglans regia OX=51240 GN=LOC108989569 PE=4 SV=1	12	8	10	5	640	70.9	9.22	20.32	108.3	112.4	110.9	107.7	111.7	105.3	93.5	94	96.9	101.2	79.1	78.9
A0A2I4GQB9	Acetylornithine transaminase OS=Juglans regia OX=51240 GN=LOC109009895 PE=3 SV=1	8	3	7	3	452	48.6	6.9	20.54	90.2	89.4	93.7	92.7	90.5	84.1	104.5	105.4	106.2	115.6	112.3	115.4
A0A2I4FMK1	Mitochondrial proton/calcium exchanger protein OS=Juglans regia OX=51240 GN=LOC109000457 PE=3 SV=1	6	4	4	1	756	85.5	5.62	14.34	118.8	101	108.6	124	129.7	128.3	71.7	89.5	97.7	75.5	75.1	80.1
A0A2I4DPR5	cleft lip and palate transmembrane protein 1 homolog OS=Juglans regia OX=51240 GN=LOC108982265 PE=4 SV=1	7	4	9	4	588	67.8	5.85	22.59	104.9	110.3	111.4	107.5	107.1	106.6	89.1	95.8	96.1	92.6	88.9	89.6
A0A2I4E8R9	Eukaryotic translation initiation factor 3 subunit H OS=Juglans regia OX=51240 GN=LOC108987343 PE=3 SV=1	14	4	7	4	337	38.5	4.82	13.8	89.3	93	93.9	94.6	87.1	87.1	108.3	108.3	106.3	106	113.4	112.5
A0A2I4GWQ4	dnaJ protein ERDJ2A OS=Juglans regia OX=51240 GN=LOC109011536 PE=4 SV=2	6	5	8	5	686	76.5	5.62	21.86	125.6	119	125.4	125.7	119.8	123	76.6	73.1	78.3	75.8	79	78.8
A0A2I4DFW2	zinc finger protein-like 1 homolog isoform X1 OS=Juglans regia OX=51240 GN=LOC108979742 PE=3 SV=1	8	2	5	2	356	38.8	8.35	14.5	119.5	110.2	126.2	126.3	114.7	123	74.2	65.6	74.6	90.7	90.5	84.6
A0A2I4DTJ6	COP9 signalosome complex subunit 1-like OS=Juglans regia OX=51240 GN=LOC108983336 PE=4 SV=1	10	4	7	4	447	51	6.58	18.79	90	84.5	83.5	91	83.8	84.1	119.5	117	117	107.2	112.7	109.6
A0A2I4GYZ2	Glutamate decarboxylase OS=Juglans regia OX=51240 GN=LOC109012088 PE=3 SV=2	6	3	6	2	502	56.5	6.28	15.54	28	30.7	28.1	32.6	29.2	27.6	184.5	176.1	168.9	162.9	168.8	162.6
A0A2I4HB49	protein GLUTELIN PRECURSOR ACCUMULATION 3 OS=Juglans regia OX=51240 GN=LOC109015367 PE=4 SV=1	8	3	3	3	500	55.5	6.65	11.12	82.5	104.6	76.1	77.8	73.4	73.1	121.6	109.7	117.7	121.1	118.4	124
A0A6P9E917	NAD(P)H dehydrogenase (quinone) OS=Juglans regia OX=51240 GN=LOC118343957 PE=3 SV=1	8	2	7	2	257	26.9	6.4	15.93	46.4	47.4	48.2	49.2	51.6	51.2	145.4	146.5	142.9	156.6	158.8	155.9
A0A2I4GVT3	syntaxin-41-like OS=Juglans regia OX=51240 GN=LOC109011309 PE=3 SV=2	18	5	5	5	325	36.2	8.85	12.41	117.4	116.4	106.1	141.5	125.4	130.1	80.1	79.8	80.4	70.5	75.1	77.1
A0A2I4DHL4	Glutamate--tRNA ligase OS=Juglans regia OX=51240 GN=LOC108980232 PE=3 SV=1	8	7	10	7	715	81.4	6.61	20.35	105.9	107.4	110.1	115	107.7	111.7	87	93.2	87.3	91.7	91.7	91.4
A0A2I4GT62	cytochrome c oxidase assembly protein COX11, mitochondrial-like OS=Juglans regia OX=51240 GN=LOC109010650 PE=3 SV=2	18	4	5	4	285	32.6	9.39	17.14	122.8	119.9	124.3	125.4	121.4	122.2	78	78.7	74.1	73.2	79.6	80.4
A0A2I4F9P3	Cellulose synthase OS=Juglans regia OX=51240 GN=LOC108996803 PE=3 SV=1	5	7	9	4	1045	118.5	7.03	20.57	35.9	39.3	36	35.4	39.4	38.4	177.8	172.2	169.6	161.1	146.2	148.6
A0A2I4GL67	far upstream element-binding protein 1 isoform X2 OS=Juglans regia OX=51240 GN=LOC109008855 PE=4 SV=1	5	4	7	4	700	72.4	6.34	19.3	74.1	72.1	75.8	78.7	78.9	78.5	129.6	126	127.2	125.4	117.2	116.6
A0A2I4ESB2	vesicle-associated membrane protein 711 OS=Juglans regia OX=51240 GN=LOC108992245 PE=3 SV=1	23	5	8	4	220	25.1	9.45	25.97	82.9	75.4	85.4	94	88.7	84.8	132.6	136	119.4	102.2	98.1	100.6
A0A2I4F0D9	protein PEROXIN-4 isoform X1 OS=Juglans regia OX=51240 GN=LOC108994386 PE=3 SV=1	25	4	7	4	157	17.8	8.46	16.64	107.4	115.4	117.9	123.9	117.7	117.1	79.2	81.6	90.5	86.8	77.6	84.9
A0A834CWE7	Uncharacterized protein OS=Juglans regia OX=51240 GN=F2P56_009384 PE=4 SV=1	30	4	7	1	136	15.6	7.4	19.48
A0A833XHU6	Pectinesterase OS=Juglans regia OX=51240 GN=F2P56_016216 PE=3 SV=1	6	4	8	1	599	65.4	8.82	21	12.9	11.4	17.2	17.6	20.2	13.9	272.4	290.3	254.4	91.2	95.2	103.1
A0A833Y2L1	NAD(+) diphosphatase OS=Juglans regia OX=51240 GN=F2P56_002732 PE=4 SV=1	7	2	2	2	454	49.8	6.35	7.56	85.7	100.1	97.9	74.5	87.9	82.1	91	102.6	95.9	133.7	119.5	129.2
A0A834CZR6	ACT domain-containing protein OS=Juglans regia OX=51240 GN=F2P56_010681 PE=4 SV=1	13	3	5	3	318	35.4	6.06	13.28	87.2	87.9	90.1	116.1	123.7	123.2	95.9	94.8	100.5	91.9	96.4	92.4
A0A2I4GEL4	Adenylosuccinate synthetase, chloroplastic OS=Juglans regia OX=51240 GN=LOC109007221 PE=3 SV=2	10	4	5	4	494	53.4	7.17	17.65	96.9	101	101.3	105.8	98.3	97.3	100.4	104.2	93.9	103.9	98.4	98.5
A0A6P9ETK2	U-box domain-containing protein 35 isoform X2 OS=Juglans regia OX=51240 GN=LOC108980742 PE=4 SV=1	5	3	4	1	645	71.8	9.04	12.32	158.2	169.2	159.9	136.3	139	145.1	53.7	48.3	50.7	46.8	49.5	43.4
A0A2I4HV48	aspartic proteinase-like OS=Juglans regia OX=51240 GN=LOC109021769 PE=3 SV=1	6	3	7	2	514	55.7	5.52	19.46	48.8	55.6	56.2	44.9	48.3	40.9	128.3	111.7	124.7	172.9	183	184.8
A0A2I4EYF2	probable aldo-keto reductase 2 OS=Juglans regia OX=51240 GN=LOC108993851 PE=4 SV=2	6	2	4	2	344	38.3	6.62	12.53	103	100.7	101.1	110.5	114.1	109.8	103.5	100.2	101.7	85.8	85.9	83.8
A0A2I4ELK0	Phospholipase D OS=Juglans regia OX=51240 GN=LOC108990691 PE=3 SV=1	4	3	5	3	852	95.5	7.93	15.4	50.9	48.2	48.3	46.1	47.1	47.4	156.9	156.1	142.3	142.7	161	153.1
A0A2I4G9F8	stem-specific protein TSJT1-like OS=Juglans regia OX=51240 GN=LOC109005884 PE=4 SV=1	8	2	6	2	236	25.3	6.28	18.35	19.8	20.5	21.4	18.3	23	21.8	202.3	202.9	192.8	173.3	152.9	151
A0A833X894	Amidophosphoribosyltransferase OS=Juglans regia OX=51240 GN=F2P56_029406 PE=3 SV=1	10	6	6	2	600	65.2	6.38	17.24	141.5	144.3	142.5	127.7	131.4	127.5	55.8	57.4	58.7	74.5	70.6	68.1
A0A2I4FTZ1	casein kinase 1-like protein 2 OS=Juglans regia OX=51240 GN=LOC109002012 PE=3 SV=1	10	5	8	1	474	52.8	9.66	13.77	100.6	104.1	110.4	110.8	104.8	103.3	99.9	95.4	99	92.9	92	86.9
A0A2I4DKM9	Glucose-1-phosphate adenylyltransferase OS=Juglans regia OX=51240 GN=LOC108981084 PE=3 SV=1	6	3	6	2	527	58.1	7.17	20.6	121.1	117.8	118.7	120.6	121.1	122.6	80.7	82.5	84.1	76.9	74.2	79.6
A0A834CXU4	Uncharacterized protein OS=Juglans regia OX=51240 GN=F2P56_011421 PE=4 SV=1	5	3	6	3	622	69.3	6.99	19.71	106.7	110.6	102.5	109	105.8	104.6	95.3	94.9	92.9	89.5	94.7	93.5
A0A2I4FWE6	cullin-3A-like isoform X1 OS=Juglans regia OX=51240 GN=LOC109002603 PE=3 SV=1	9	6	6	3	733	85.3	7.74	11.79	104.5	119.4	112.6	116.5	114.9	120.9	89.1	88.5	89.6	89.5	77.8	76.7
A0A2I4E6P0	probable pectinesterase/pectinesterase inhibitor 51 OS=Juglans regia OX=51240 GN=LOC108986775 PE=3 SV=1	2	2	5	2	537	58.7	6.33	10.73	62.6	62.6	63.7	66.3	63.4	60.8	130.9	127.6	129.1	146.6	138.2	148.2
A0A6P9EDQ5	insulin-degrading enzyme-like 1, peroxisomal OS=Juglans regia OX=51240 GN=LOC109003515 PE=3 SV=1	2	2	7	1	966	111.5	6.32	18.33	95.2	90.9	88.3	94.9	85.2	81.2	94.7	111.1	108.4	113.5	116.5	120.1
A0A834D126	Ribosomal_L18A domain-containing protein (Fragment) OS=Juglans regia OX=51240 GN=F2P56_009192 PE=3 SV=1	19	5	13	5	216	25.8	10.3	29.29	146.1	146.1	145.3	131.1	141.1	135.2	44.2	42.1	49.3	78.8	70.8	70
A0A6P9E2R0	UDP-sugar pyrophosphorylase-like isoform X3 OS=Juglans regia OX=51240 GN=LOC109012130 PE=4 SV=1	5	3	8	3	627	69	6.38	18.41	107.2	108.2	112.4	109	99.8	104.3	84.5	81.5	85.4	97.7	103.5	106.4
A0A2I4EJL5	AUGMIN subunit 7 OS=Juglans regia OX=51240 GN=LOC108990165 PE=4 SV=1	10	3	4	3	329	37.3	4.87	13.77	85.2	81.8	78.3	106.3	101.5	94.2	116.8	111.2	111.1	98.9	110	104.7
A0A2I4FBZ1	brefeldin A-inhibited guanine nucleotide-exchange protein 1-like isoform X1 OS=Juglans regia OX=51240 GN=LOC108997382 PE=4 SV=1	3	5	6	5	1725	191.5	5.87	16.32	142.8	138.1	135.4	137.2	125.8	125.6	67.8	65.3	72.7	60.2	65.7	63.3
A0A2I4EYU2	Conserved oligomeric Golgi complex subunit 2 OS=Juglans regia OX=51240 GN=LOC108993935 PE=3 SV=1	5	4	5	4	758	84.4	5.57	13.42	118.2	116.4	121.8	124.7	113.1	123.6	89.7	87.8	93.1	66.9	73.3	71.4
A0A6P9DV29	Calcium-transporting ATPase OS=Juglans regia OX=51240 GN=LOC109007860 PE=3 SV=1	3	3	5	3	1002	109.6	6.14	11.12	97.5	114.2	114.2	85	88.7	92	105.6	104.3	107.6	95.8	100.4	94.6
A0A2I4DX15	copper transport protein ATX1-like OS=Juglans regia OX=51240 GN=LOC108984255 PE=4 SV=1	22	2	7	2	114	12	5.01	15.97	43.9	49.2	52.2	92.9	90.6	85.9	126.3	120.8	127.8	136.7	136.4	137.5
A0A833X1K2	Uncharacterized protein (Fragment) OS=Juglans regia OX=51240 GN=F2P56_027738 PE=3 SV=1	19	5	5	5	242	28.4	6.4	14.28	120	111.3	119.1	131.5	128.4	123.5	68	75.6	75.2	75.8	87.5	84
A0A2I4F928	stomatin-like protein 2, mitochondrial OS=Juglans regia OX=51240 GN=LOC108996614 PE=3 SV=2	11	4	7	4	425	46.3	9.44	22.05	109.2	111.2	111.1	110.6	105.8	113.7	94.3	92.3	86.6	85.3	89.2	90.8
A0A6P9DUA7	Methyltransferase OS=Juglans regia OX=51240 GN=LOC108983889 PE=3 SV=1	6	3	5	3	592	67.6	8.21	13.41	115.9	124.8	129.3	126.7	116.6	116	77.2	80.2	83.6	78.2	74.6	76.9
A0A6P9EPL0	protein FMP32, mitochondrial-like isoform X1 OS=Juglans regia OX=51240 GN=LOC109010691 PE=4 SV=1	12	2	3	2	244	27.4	7.87	10.38	149.4	151.8	140.6	171.5	161.1	161.3	34.9	39.4	53.1	45.9	43	48
A0A2I4FM95	Sulfurtransferase OS=Juglans regia OX=51240 GN=LOC109000385 PE=4 SV=1	6	2	6	2	376	41.6	7.42	16.4	72.9	77.8	80.4	84.2	85.3	85.5	120	122.8	120.9	116.4	119.3	114.5
A0A2I4H159	Chlorophyll a-b binding protein, chloroplastic OS=Juglans regia OX=51240 GN=LOC109012622 PE=3 SV=1	11	3	8	1	265	28.5	5.96	27.69	26.9	29.2	26.9	31.9	33.1	31.8	175.7	173.7	167.5	168.1	165.1	169.9
A0A2I4GWE4	Adenine phosphoribosyltransferase OS=Juglans regia OX=51240 GN=LOC109011461 PE=3 SV=1	13	3	5	3	182	20	7.15	11.43	90.1	93.3	92.9	90.7	87.9	82.9	114.8	115.8	112.6	109.1	107.7	102.3
A0A2I4ECI4	cellulose synthase-like protein D3 OS=Juglans regia OX=51240 GN=LOC108988325 PE=4 SV=1	4	5	6	1	1148	128.4	7.24	14.07	116.5	102	115.1	93.7	95.4	107.4	86.4	92.9	103.3	92.4	102.3	92.5
A0A2I4E840	mitochondrial adenine nucleotide transporter ADNT1-like OS=Juglans regia OX=51240 GN=LOC108987147 PE=3 SV=1	12	4	5	3	357	38.4	9.48	11.52	97.7	92.6	94.9	148.7	142.2	144.9	87.9	92.6	94.7	67.9	69	67.1
A0A2I4FMM6	Protein transport protein SEC23 OS=Juglans regia OX=51240 GN=LOC109000488 PE=3 SV=1	7	3	4	3	869	94.9	6.67	6.92	95	108.5	114.9	94.8	95.9	96.2	110.6	112	112.2	91.1	86.7	82.3
A0A833Y7V7	Uncharacterized protein OS=Juglans regia OX=51240 GN=F2P56_001989 PE=3 SV=1	22	3	8	3	132	13.8	4.41	19.1	113.8	114.5	116.3	127.6	124.2	126.2	75.1	74.6	76.8	79.8	85.6	85.5
A0A2I4H7Z2	Nuclear pore protein OS=Juglans regia OX=51240 GN=LOC109014310 PE=3 SV=1	5	4	5	4	861	95.6	7.28	13.44	79.7	89.5	81.6	87.7	86	88.5	113.6	116.4	112.9	114.7	115	114.4
A0A2I4DKY2	uncharacterized protein LOC108981167 OS=Juglans regia OX=51240 GN=LOC108981167 PE=4 SV=1	12	2	4	2	174	19.7	6.68	12.28	113.7	105	112.3	129.3	121.8	125	83.3	77.1	85.4	80.8	80.4	85.8
A0A2I4EHK1	L-ascorbate peroxidase OS=Juglans regia OX=51240 GN=LOC108989652 PE=3 SV=1	9	2	7	2	250	27.4	6.02	17.58	34.5	31.9	29.7	39.5	42	40.7	164.8	168.4	157.8	168.1	164.2	158.4
A0A2I4H403	Ribulose-phosphate 3-epimerase OS=Juglans regia OX=51240 GN=LOC109013305 PE=3 SV=1	11	2	4	2	282	30.1	8.81	15.12	42	44.6	46.6	51	48.2	50.1	146.5	145.2	146.3	157.1	161.5	160.9
A0A2I4DYV7	Phosphoinositide phospholipase C OS=Juglans regia OX=51240 GN=LOC108984744 PE=4 SV=2	8	5	7	1	624	70.9	6.71	11.45	34.6	33.9	36.1	35.6	38.7	49.2	167.7	186.4	180.6	153.9	135.8	147.5
A0A2I4GXD6	Non-specific serine/threonine protein kinase OS=Juglans regia OX=51240 GN=LOC109011720 PE=3 SV=2	10	5	7	1	461	51.8	9.73	14.31	111.5	94.3	85.4	120.2	104.2	68.8	118	99.1	85.7	99.4	116.2	97.2
A0A2I4FVH4	6-phosphofructo-2-kinase/fructose-2, 6-bisphosphatase-like OS=Juglans regia OX=51240 GN=LOC109002381 PE=4 SV=1	4	3	5	1	757	84.2	7.11	12.75	118.8	128	135.2	130.4	119.3	117.2	72.4	72.9	67.4	68.5	88.8	81.2
A0A6P9EY18	Ubiquitin carboxyl-terminal hydrolase OS=Juglans regia OX=51240 GN=LOC109016011 PE=3 SV=1	7	4	5	4	656	73.9	7.43	13.61	97.2	91.8	93.7	95.7	99.1	95.2	106.3	103.1	98.2	102.9	111.3	105.3
A0A2I4HLE3	Conserved oligomeric Golgi complex subunit 5 OS=Juglans regia OX=51240 GN=LOC109019192 PE=4 SV=1	4	3	5	3	823	89.9	7.49	12.1	97.1	106.1	103	103.4	107.8	107.3	103.1	100.2	107.2	85.8	87.6	91.4
A0A2I4F8Z7	glutelin type-D 1-like OS=Juglans regia OX=51240 GN=LOC108996597 PE=3 SV=1	12	4	10	2	356	38.5	5.6	26.99	164	163.2	155.8	146.9	159	153.4	37.1	39.8	45.1	44.7	47	44
A0A2I4G9N5	probable serine/threonine-protein phosphatase 2A regulatory subunit B'' subunit TON2 OS=Juglans regia OX=51240 GN=LOC109005962 PE=4 SV=1	16	8	8	8	476	54.7	5.05	14.77	56.4	63.5	65.2	66	66.9	64.9	146.9	140.7	135	132.4	130.2	131.8
A0A2I4FV25	PHD finger-like domain-containing protein 5A OS=Juglans regia OX=51240 GN=LOC109002271 PE=3 SV=1	35	4	6	4	110	12.4	8.41	14.29	61	63.8	60.5	73	73.5	69.6	130.5	127.8	125.3	146	134.6	134.3
A0A2I4DPP6	LOW QUALITY PROTEIN: calcium-dependent protein kinase SK5 OS=Juglans regia OX=51240 GN=LOC108982257 PE=4 SV=2	8	3	4	1	502	56.6	5.43	12.02	30.5	34.5	24	33	30.7	31.6	142.4	149.2	167.1	170.7	191.6	194.7
A0A2I4DP19	Serine/threonine-protein phosphatase OS=Juglans regia OX=51240 GN=LOC108982072 PE=3 SV=1	17	5	8	2	305	34.6	5.49	15.2	69	97.4	89.1	89.1	75.2	71.5	104.7	97	110.4	142.8	124.2	129.5
A0A2I4GJM1	DNA topoisomerase (ATP-hydrolyzing) OS=Juglans regia OX=51240 GN=LOC109008450 PE=3 SV=1	6	6	8	6	964	105.6	8.09	12.95	97.1	107.4	101.8	92.6	98.5	100.6	99.1	96.5	93.3	101.5	106.5	105.2
A0A2I4GI13	haloacid dehalogenase-like hydrolase domain-containing protein Sgpp OS=Juglans regia OX=51240 GN=LOC109008038 PE=4 SV=2	6	1	4	1	245	27.1	5.21	10.14	156.3	167.6	167.9	154.6	137.5	142.9	46	43.8	51.2	39.9	42.9	49.5
A0A2I4EQU4	Phosphoinositide phospholipase C OS=Juglans regia OX=51240 GN=LOC108991834 PE=4 SV=1	8	5	8	1	599	68	6.67	13.36	33.9	31.3	34.7	34.2	35.4	37.9	199.5	195.1	199.2	129.4	137.3	132.1
A0A2I4FT99	uncharacterized protein LOC109001851 isoform X2 OS=Juglans regia OX=51240 GN=LOC109001851 PE=4 SV=1	7	2	3	1	424	48.4	6	9.28	150.3	107.5	96.1	118.8	103.7	123.4	88.1	69.8	93.5	85.3	88.9	74.8
A0A2I4ET44	nuclear pore complex protein NUP98A OS=Juglans regia OX=51240 GN=LOC108992458 PE=4 SV=1	4	3	4	3	1030	105.4	9.22	7.85	95.1	92.4	91.7	107.3	96.7	100.3	104.9	103.8	100.2	103.7	98.6	105.3
A0A6P9ESS4	Carboxypeptidase OS=Juglans regia OX=51240 GN=LOC109021509 PE=3 SV=1	12	4	4	4	472	52.7	6.93	12.59	98.2	104.6	111.5	178	140.9	145.1	56.1	53.2	55.5	85.4	83.1	88.3
A0A6P9E1S5	DENN domain and WD repeat-containing protein SCD1-like isoform X2 OS=Juglans regia OX=51240 GN=LOC109016591 PE=4 SV=1	3	3	5	1	1201	132.3	6.57	12.87	115	103.7	104	96.4	99.7	88.1	107.1	100.4	110	83.5	90.3	101.8
A0A2I4G187	5'-deoxynucleotidase OS=Juglans regia OX=51240 GN=LOC109003814 PE=3 SV=1	12	3	5	3	268	29.7	7.88	14.47	107.9	113.3	117.1	122.6	120.6	123.9	75.5	77.9	84	85	86	86.3
A0A2I4GFS3	IAA-amino acid hydrolase ILR1-like 3 OS=Juglans regia OX=51240 GN=LOC109007519 PE=3 SV=1	11	3	3	3	436	47.7	5.88	7.95	65.7	67.7	69.8	68.4	67.1	65.9	135.8	135	133.7	133.5	122.9	134.5
A0A833UNV0	Ubiquitin receptor RAD23 (Fragment) OS=Juglans regia OX=51240 GN=F2P56_021539 PE=3 SV=1	11	4	5	1	421	45.4	4.93	18.68	92.1	87.7	82.2	92.4	95.5	92.7	114.1	110.5	108.2	111.8	102	110.7
A0A2I4E6V2	CBS domain-containing protein CBSX3, mitochondrial-like OS=Juglans regia OX=51240 GN=LOC108986804 PE=4 SV=1	18	4	9	4	205	22.9	8.73	19.87	65.6	66.5	62.9	74.5	75.8	75.7	122.4	125.9	120	135.1	140.4	135.2
A0A2I4GST7	myosin-15 OS=Juglans regia OX=51240 GN=LOC109010545 PE=3 SV=1	3	4	6	1	1522	173.7	8.75	20.52	94.3	75.6	102.6	84.5	74.1	82.6	124.3	117.6	123.8	99.9	108.4	112.1
A0A6P9E8T7	P-loop guanosine triphosphatase YjiA-like OS=Juglans regia OX=51240 GN=LOC109003272 PE=3 SV=1	10	3	3	3	447	49.5	6.58	10.63	100.6	114.8	114.2	160.8	149.1	149.5	58.4	63.6	68.8	67.4	79.9	72.9
A0A2I4FYM5	uncharacterized protein LOC109003181 OS=Juglans regia OX=51240 GN=LOC109003181 PE=4 SV=1	15	1	4	1	91	11.1	8.18	9.83
A0A2I4E5Y3	ras-related protein RABA3 OS=Juglans regia OX=51240 GN=LOC108986596 PE=4 SV=1	17	4	8	2	237	26	5.36	21.44	62.7	56.9	59.6	60.9	61.7	53.6	168.5	155.9	165.5	115.2	114.3	125.2
A0A2I4EHS2	protein argonaute 4-like isoform X2 OS=Juglans regia OX=51240 GN=LOC108989696 PE=3 SV=1	7	6	7	1	922	102.8	8.68	13.3
A0A833UF27	RRM domain-containing protein OS=Juglans regia OX=51240 GN=F2P56_020232 PE=4 SV=1	10	3	6	3	289	30.9	8.95	15.44	95.1	101.6	100	97.4	107.9	103.4	103.7	105.4	100.4	95.4	92.5	97.3
A0A2I4HH14	pumilio homolog 2-like OS=Juglans regia OX=51240 GN=LOC109017714 PE=4 SV=1	3	3	4	3	1062	114.6	6.23	13.47	69.2	67.8	71.3	77	82.5	79.5	136.6	130.7	122.5	125.6	116.3	121
A0A2I4DLC9	Pectinesterase OS=Juglans regia OX=51240 GN=LOC108981308 PE=4 SV=1	4	2	6	2	369	40.3	7.01	17.45	212.5	206.7	211.6	154	150.1	153.4	16	16	19.1	19.6	22.6	18.4
A0A2I4HLM0	persulfide dioxygenase ETHE1 homolog, mitochondrial OS=Juglans regia OX=51240 GN=LOC109019225 PE=4 SV=1	8	2	4	2	296	32.9	8.29	12.83	138.5	140.9	142.7	139.6	133.5	130.9	63.5	56.7	63.7	63.2	61.7	65.1
A0A2I4HS43	clathrin interactor EPSIN 2 isoform X1 OS=Juglans regia OX=51240 GN=LOC109020905 PE=4 SV=1	4	4	6	3	914	97.5	5.67	17.37	123.5	117.8	120.6	146.5	139.6	136	72.7	74.3	75.8	66.8	62.1	64.3
A0A2I4E5W7	Nucleoside diphosphate kinase OS=Juglans regia OX=51240 GN=LOC108986589 PE=3 SV=1	18	4	7	4	235	26.2	8.54	20.67	91	89.1	93.1	91.9	94.6	92.9	110.9	109.6	109.7	107.5	106.3	103.6
A0A2I4EWN2	Peptidyl-prolyl cis-trans isomerase OS=Juglans regia OX=51240 GN=LOC108993371 PE=3 SV=2	28	4	12	3	174	18.2	8.69	21.53	87.7	84.8	83.2	110.2	106.1	104.5	107.5	99.2	102.3	102.3	105.4	106.8
A0A2I4EBX9	ABC transporter B family member 27-like OS=Juglans regia OX=51240 GN=LOC108988197 PE=4 SV=1	7	5	5	1	644	69.5	8.09	12.62	128.7	133.9	139.7	114.5	109.1	113.1	67.1	84	73.2	73	82.3	81.4
A0A2I4GFI8	probable arabinosyltransferase ARAD1 OS=Juglans regia OX=51240 GN=LOC109007431 PE=3 SV=1	4	2	4	2	512	58.9	8.7	12.26	160.1	172.7	168	170.2	166.8	172.2	29.5	26.2	34.8	33.6	31.1	34.9
A0A2I4DDI6	alpha-glucan water dikinase, chloroplastic isoform X2 OS=Juglans regia OX=51240 GN=LOC108979086 PE=3 SV=1	4	4	4	4	1472	165.2	7.15	13.96	129.2	131.5	129.7	145.9	147.6	146.2	52.6	48.9	56.6	69.4	74.4	68.1
A0A2I4FMM2	ABC transporter B family member 4-like OS=Juglans regia OX=51240 GN=LOC109000487 PE=4 SV=1	4	6	8	1	1304	140.3	8.25	18.7	128	120.7	129.4	115.4	118.6	119.7	72.3	74.6	70.1	82.4	87.5	81.2
A0A2I4E1I3	vesicle-associated membrane protein 721-like OS=Juglans regia OX=51240 GN=LOC108985427 PE=3 SV=1	21	5	9	3	219	24.7	8.41	9.54	58.9	50.5	62.7	79.1	76.8	77.9	112.4	112.8	119.1	148	148.7	153.1
A0A2I4FU29	syntaxin-71-like isoform X1 OS=Juglans regia OX=51240 GN=LOC109002034 PE=3 SV=1	14	3	4	3	270	30.4	5.88	9.21	52.3	58.3	58.7	76.6	72.2	68.9	150.7	162.2	154.1	118.4	110.2	117.3
A0A833XR26	FAD-binding PCMH-type domain-containing protein OS=Juglans regia OX=51240 GN=F2P56_007218 PE=3 SV=1	5	3	7	3	559	62.1	9.2	18.27	13.2	14.5	12.7	12.2	12.6	16.6	206.9	206.8	199.6	164.9	171.6	168.5
A0A2I4F845	cytochrome c oxidase subunit 5b-1, mitochondrial-like OS=Juglans regia OX=51240 GN=LOC108996392 PE=4 SV=1	21	2	7	2	164	18	6.04	21.8	114.3	114.8	123.5	149	141.2	141.2	67.2	65.8	64.5	73.6	69.1	75.8
A0A2I4EW72	Endoplasmic reticulum transmembrane protein OS=Juglans regia OX=51240 GN=LOC108993249 PE=3 SV=1	9	2	5	2	129	15	8.68	19.85	79.6	81.3	71.9	77.5	78.3	86.2	129.9	130.8	117	112.2	116	119.4
A0A833Y6P3	PKS_ER domain-containing protein OS=Juglans regia OX=51240 GN=F2P56_005164 PE=4 SV=1	8	2	3	2	336	36.6	9.39	10.35	136.2	140.8	140.1	164.4	151.9	152.1	49.9	49.1	55.5	56	53.3	50.6
A0A2I4EUC9	Formate dehydrogenase, mitochondrial OS=Juglans regia OX=51240 GN=LOC108992808 PE=3 SV=1	18	6	10	6	384	42.1	7.58	20.77	29.2	30.1	31.9	26.5	29.5	31.4	171.4	168.3	161.9	174.2	177.4	168.3
A0A2I4GFZ1	vacuolar protein sorting-associated protein 26B-like OS=Juglans regia OX=51240 GN=LOC109007554 PE=3 SV=1	19	5	6	3	302	35	7.94	15.01	76.3	73.1	71.6	76	66.1	71.6	127.2	128.3	119.8	130.8	129.4	129.9
A0A2I4F6K9	Dolichyl-diphosphooligosaccharide--protein glycosyltransferase subunit 2 OS=Juglans regia OX=51240 GN=LOC108996013 PE=3 SV=1	4	3	9	3	692	75.4	6.24	24.34	103.3	99.6	101.6	100	105.6	99.2	96.7	99.1	104.2	93.5	98.2	99
A0A2I4EPJ9	O-fucosyltransferase family protein OS=Juglans regia OX=51240 GN=LOC108991511 PE=3 SV=1	8	4	5	4	571	65.2	8.68	14.38	121.7	116.4	122.8	130.8	117.7	123.9	73.5	77.8	78.8	76.9	81.4	78.2
A0A833X303	Uncharacterized protein OS=Juglans regia OX=51240 GN=F2P56_021634 PE=3 SV=1	17	3	5	2	190	21.5	7.34	15.17	73.1	73.7	79.5	89.2	90	86.4	121.4	129.7	123.7	108.8	109	115.5
A0A2I4EDN5	glycosyltransferase-like KOBITO 1 isoform X1 OS=Juglans regia OX=51240 GN=LOC108988645 PE=4 SV=1	8	3	4	1	539	60.9	8.91	11.06	76.6	73	85.4	102.7	65.3	90.2	122.2	111.5	111.8	98.1	113.6	149.5
A0A2I4GHZ5	dynamin-related protein 1E-like OS=Juglans regia OX=51240 GN=LOC109008037 PE=3 SV=2	8	5	7	1	615	68.9	7.84	14.91	31.5	40.3	34	28	31.5	31.1	162.6	165.9	167.6	157.9	171.8	177.8
A0A6P9E1H2	Methyltransferase OS=Juglans regia OX=51240 GN=LOC109019397 PE=3 SV=1	5	2	4	2	304	34.1	6.06	10.88	128	123	118.9	149.3	141.6	141.2	66.3	68.3	68.7	62.7	66.1	65.9
A0A2I4G142	Proliferating cell nuclear antigen OS=Juglans regia OX=51240 GN=LOC109003774 PE=3 SV=1	13	4	6	1	266	29.6	4.79	18.19	58.6	54.5	53.2	52.3	54.9	50.8	127	125.8	121.3	169.2	167.7	164.8
A0A2I4F797	Beta-galactosidase OS=Juglans regia OX=51240 GN=LOC108996212 PE=3 SV=1	5	4	6	4	867	96.6	6.6	13.85	57.4	63.6	63.6	63.1	62.7	60.7	173.7	161.1	159.7	116.9	109.5	108
A0A2I4DHB7	Glutathione peroxidase OS=Juglans regia OX=51240 GN=LOC108980142 PE=3 SV=1	16	4	8	4	201	22.6	7.77	20.88	68.1	67.7	71.7	83.8	89.3	88.4	139	138.1	135.4	104.3	108.2	105.8
A0A2I4E3C6	Methyltransferase OS=Juglans regia OX=51240 GN=LOC108985887 PE=3 SV=1	6	4	5	4	598	67.1	8.27	13.3	112.4	132	135.3	102.6	113.5	105.9	90.1	84.1	87.7	88.8	75.3	72.3
A0A6P9ER86	L-lactate dehydrogenase OS=Juglans regia OX=51240 GN=LOC109013131 PE=3 SV=1	8	2	4	2	350	37.6	7.02	14.36	126.9	128.3	127.3	127	126.3	122.5	68.7	76.7	70.8	74.8	73.1	77.5
A0A2I4DYQ4	cell division protein FtsZ homolog 1, chloroplastic-like isoform X1 OS=Juglans regia OX=51240 GN=LOC108984689 PE=3 SV=1	11	3	3	3	416	43.7	6.33	9.99	97.5	92.2	99.3	103.2	94.4	97.6	102.9	98.4	101	104.5	101.2	107.7
A0A2I4GJM9	Beta-galactosidase OS=Juglans regia OX=51240 GN=LOC109008460 PE=3 SV=1	2	2	8	1	846	94.6	6.57	21.87	202.6	205.7	197.3	189.8	187.2	186	0.8	2.1	6.3	8.1	7.5	6.7
A0A2I4EQS9	Eukaryotic translation initiation factor 3 subunit F OS=Juglans regia OX=51240 GN=LOC108991819 PE=3 SV=1	9	3	5	1	285	31.3	5.73	17.2	109.6	109.9	104.4	113.8	120.2	114.3	86.4	89.7	89.9	93.9	84.9	82.9
A0A2I4ELH3	probable inactive serine/threonine-protein kinase scy1 OS=Juglans regia OX=51240 GN=LOC108990673 PE=4 SV=1	7	6	8	1	799	86.6	7.21	19.81	106	102.4	103	102.7	101.5	103.9	107.1	99.6	104.3	85.2	91.1	93.2
A0A2I4F6K4	Cellulose synthase OS=Juglans regia OX=51240 GN=LOC108996010 PE=3 SV=1	5	6	8	2	1044	118.5	7.55	12.86	34.5	25.1	27.7	34.2	30.5	30	185.9	189.6	182.2	146.1	161.4	152.7
A0A2I4F556	WD repeat-containing protein 11 OS=Juglans regia OX=51240 GN=LOC108995643 PE=4 SV=2	4	6	6	6	1348	147.9	6.76	15.31	102.5	118.4	107.4	99.3	105.1	104.6	100.2	94.7	92.5	87.8	88.3	99
A0A2I4HX61	Pectinesterase OS=Juglans regia OX=51240 GN=LOC109022340 PE=3 SV=1	4	2	7	1	587	65.7	7.5	24.27	202.4	193.4	198.1	171.1	166.2	172.2	18.4	17	18.4	13	14.6	15.1
A0A2I4EXP2	GDSL esterase/lipase At5g33370-like OS=Juglans regia OX=51240 GN=LOC108993637 PE=3 SV=1	12	4	6	2	372	41.1	5.68	17.48	45.3	41.9	46.2	51.2	52.7	54	184	183.6	171.7	121.7	125.5	122.1
A0A6P9E414	heterogeneous nuclear ribonucleoprotein 1 isoform X1 OS=Juglans regia OX=51240 GN=LOC109012630 PE=4 SV=1	6	2	3	2	491	51.8	9.13	10.41	113.2	112.4	114.4	127.1	118.9	122.7	90.3	90.2	91.7	69.6	77.1	72.4
A0A2I4FTU2	heat shock 70 kDa protein 17 OS=Juglans regia OX=51240 GN=LOC109001978 PE=4 SV=2	3	3	6	3	894	99.7	5.9	14.73	125.6	124	123.3	112.6	113.9	108.3	73.6	76	78.7	88.4	87.3	88.3
A0A2I4H1U0	alcohol dehydrogenase OS=Juglans regia OX=51240 GN=LOC109012766 PE=4 SV=1	7	2	3	2	445	48.2	7.64	11	124.2	123	129.3	111.8	107.4	110.5	85.8	81.9	77.8	82.7	88.6	77.2
A0A2I4EYS3	plasma membrane-associated cation-binding protein 1-like OS=Juglans regia OX=51240 GN=LOC108993939 PE=4 SV=1	10	2	22	2	222	24.5	5.01	24.94	29.8	29.6	30.8	30.3	31.2	32.1	181.1	194.2	183.7	149.3	156.7	151.1
A0A2I4FXU7	ATP synthase subunit d, mitochondrial OS=Juglans regia OX=51240 GN=LOC109002987 PE=3 SV=1	16	3	8	3	168	19.7	5.4	24.22	108.4	110.5	105.8	131.1	127.5	124.6	84	78	80	85	80.5	84.6
A0A2I4GPL8	DNA damage-repair/toleration protein DRT102-like OS=Juglans regia OX=51240 GN=LOC109009710 PE=4 SV=2	13	3	4	3	312	33.7	5.16	15.49	57	61	57.2	60.6	57.6	54.5	127.9	131.9	126.2	152.8	150.5	162.7
A0A2I4GAX5	Histone H2A OS=Juglans regia OX=51240 GN=LOC109006290 PE=3 SV=1	24	3	8	2	138	14.6	10.32	23.6	70.4	71.8	68.9	84	84	83.9	98.8	102.6	99.9	137.2	149.4	149
A0A2I4FY77	alpha-1,2-Mannosidase OS=Juglans regia OX=51240 GN=LOC109003082 PE=3 SV=1	7	3	4	3	584	66.8	6.92	11.77	74.2	84.4	88.7	76.6	77.8	81.6	111.2	105.5	107.5	122.4	133.4	136.6
A0A833WUP5	MSP domain-containing protein OS=Juglans regia OX=51240 GN=F2P56_031856 PE=4 SV=1	14	4	7	1	282	31.5	8.6	17.18	124.4	118.5	115.3	114.9	104.4	121.9	78.2	82.1	82.2	81.4	89.5	87.3
A0A6P9EG89	protein disulfide isomerase-like 5-1 OS=Juglans regia OX=51240 GN=LOC109009332 PE=4 SV=1	25	4	6	4	147	16.7	5.41	17.08	110.8	106.8	108	129.9	129.7	128.2	77.8	74.9	76.9	88.1	84.6	84.3
A0A833WTC1	Amidophosphoribosyltransferase OS=Juglans regia OX=51240 GN=F2P56_036370 PE=3 SV=1	9	5	6	1	592	64.6	6.67	14.28	129.1	129.5	125.7	135.3	131.6	127.7	69.1	63.7	71.7	69.7	76.5	70.4
A0A2I4GGS3	UPF0047 protein YjbQ-like OS=Juglans regia OX=51240 GN=LOC109007741 PE=3 SV=1	12	2	4	2	189	20.8	8.48	12.71	86	92.6	103.1	102.3	105.2	109.2	101.4	95.3	98.3	101.6	102.6	102.4
A0A2I4GW38	monocopper oxidase-like protein SKU5 OS=Juglans regia OX=51240 GN=LOC109011384 PE=3 SV=1	5	2	4	2	591	66.1	8.66	8.74	39.3	35.4	35	37.6	39.9	33.9	229.3	214.4	214.7	105.2	109.1	106.3
A0A2I4H386	caffeic acid 3-O-methyltransferase OS=Juglans regia OX=51240 GN=LOC109013104 PE=3 SV=1	8	2	3	2	359	39.8	5.92	10.41	77.6	83.6	92.6	93.1	88.9	80.7	103.7	120	108.8	119.4	116.2	115.5
A0A2I4FWW1	Signal peptidase complex subunit 2 OS=Juglans regia OX=51240 GN=LOC109002726 PE=3 SV=1	13	2	5	2	191	21.6	9.28	18.3	83.1	84.1	81.6	93.4	91.9	87.3	107.4	103.3	110.8	115.9	121.8	119.5
A0A2I4G5D3	NADPH-dependent aldo-keto reductase, chloroplastic-like OS=Juglans regia OX=51240 GN=LOC109004861 PE=3 SV=1	14	4	4	2	315	35.1	8.37	12.93	60.7	59.5	58.1	88.2	80.5	79.1	122.4	118.4	108.7	135.2	149.8	139.6
A0A2I4DKZ4	RNA helicase aquarius OS=Juglans regia OX=51240 GN=LOC108981188 PE=4 SV=1	4	6	6	6	1544	177.1	5.85	16.34	74.5	80.4	84.1	72.5	79.9	74.9	115.1	108.9	116	126.2	134.8	132.7
A0A2I4F075	uncharacterized protein LOC108994347 isoform X1 OS=Juglans regia OX=51240 GN=LOC108994347 PE=4 SV=1	4	4	6	3	1208	131.2	6.9	15.15	102.3	108.9	107.6	126.8	124.2	123.1	84	84.2	75	81.7	93.2	89
A0A834CPL2	Uncharacterized protein OS=Juglans regia OX=51240 GN=F2P56_015454 PE=3 SV=1	7	4	7	4	489	54.1	9.39	20.82	113.7	118.1	121.9	109.4	100.4	99.9	87.5	88.2	85.9	98.8	89.1	87.2
A0A2I4FHH2	vacuolar protein sorting-associated protein 52 A-like isoform X2 OS=Juglans regia OX=51240 GN=LOC108998843 PE=3 SV=2	5	4	5	1	732	83.4	6.04	14.08	93.6	96.7	94.9	97.9	94.8	96.7	106.4	107.5	108.5	102.6	98.6	101.8
A0A2I4F226	topless-related protein 2 OS=Juglans regia OX=51240 GN=LOC108994795 PE=4 SV=1	4	6	7	1	1131	124.7	7.18	15.97	58.6	70.1	58.8	65.7	71.6	70.9	123	140.8	106.6	156.4	130.7	147
A0A2I4EUE0	Protein arginine methyltransferase NDUFAF7 OS=Juglans regia OX=51240 GN=LOC108992822 PE=3 SV=1	7	2	4	2	495	54.4	5.69	11.23	120.9	133.5	110.4	136.3	129.7	138.4	74.1	75.6	79.9	67.2	70.6	63.5
A0A2I4G8E9	actin-related protein 4-like OS=Juglans regia OX=51240 GN=LOC109005615 PE=3 SV=2	9	3	3	1	445	49	5.27	10.31	59.4	89.2	82.5	51.1	83	74.2	113.2	110.1	122.4	123.1	152.8	138.9
A0A2I4FZ83	alpha,alpha-trehalose-phosphate synthase [UDP-forming] 5-like OS=Juglans regia OX=51240 GN=LOC109003322 PE=3 SV=1	4	3	5	1	860	97.2	6.3	11.11	147.7	153.4	155.6	140.7	141.8	136.6	51.4	47.6	50.6	59.8	57.1	57.7
A0A2I4GER5	glutaredoxin-C2-like OS=Juglans regia OX=51240 GN=LOC109007257 PE=3 SV=1	14	2	4	2	107	11.1	7.12	13.49	144.5	145.1	131.6	203	201.4	197.5	26.1	19.1	30.2	35.8	32.3	33.3
A0A2I4FCE3	U2 small nuclear ribonucleoprotein A' OS=Juglans regia OX=51240 GN=LOC108997462 PE=3 SV=1	11	3	4	3	287	32.7	5.06	11.93	72.1	77.7	72.2	93.5	88.7	93.5	118.5	113.5	106.1	116	125.7	122.4
A0A2I4E5I6	N-carbamoylputrescine amidase OS=Juglans regia OX=51240 GN=LOC108986489 PE=4 SV=1	10	2	4	2	299	33.4	6.55	13.06	67.4	80.2	81.3	100.1	92.5	91.7	101.8	101.7	102.4	125.2	122.5	133.3
A0A2I4DSD4	peroxygenase-like OS=Juglans regia OX=51240 GN=LOC108983007 PE=3 SV=1	13	3	4	3	239	26.9	5.87	10.57	80.4	74.7	82.2	82.5	93.5	89.5	88.4	80.3	80.6	161.7	134.3	151.8
A0A2I4H5X1	receptor-like protein kinase THESEUS 1 OS=Juglans regia OX=51240 GN=LOC109013786 PE=4 SV=1	3	3	5	1	855	93.6	5.5	13.62	38.7	50.6	49.7	36.1	42.3	43.4	237	211.9	186.3	97.1	85.5	121.2
A0A6P9E1C6	Cellulose synthase OS=Juglans regia OX=51240 GN=LOC109018844 PE=3 SV=1	4	5	5	1	1082	120.8	7.31	12.63	51.8	51.3	46.2	66.6	68.5	52.7	151.7	127.6	135.9	141.7	132.4	173.7
A0A2I4GXR1	calcium-dependent protein kinase 11-like OS=Juglans regia OX=51240 GN=LOC109011806 PE=3 SV=1	13	5	5	1	500	56.1	5.73	12.85	49.3	57.5	72	54.2	60.9	56.4	117.8	107.6	102.4	168.9	174.6	178.4
A0A2I4HLK4	Peptidyl-prolyl cis-trans isomerase OS=Juglans regia OX=51240 GN=LOC109019226 PE=3 SV=1	11	2	4	2	225	25.3	6.4	13.33	116.1	109.4	109.1	122	122.9	116.4	81	87.3	81.6	89.1	85	80
A0A6P9EP33	uncharacterized protein LOC108992771 OS=Juglans regia OX=51240 GN=LOC108992771 PE=4 SV=1	8	2	3	2	423	47.6	8.41	10.26	144.1	142.1	152.2	159.5	152.3	152.8	44.9	45.5	48.8	51.6	49.9	56.3
A0A2I4HCC3	Autophagy-related protein OS=Juglans regia OX=51240 GN=LOC109015794 PE=3 SV=1	30	2	3	2	117	13.5	9.06	8.26	101.4	105.1	105.4	111.5	109.4	114.1	89.6	84.8	87.8	94.4	100.8	95.6
A0A2I4ENG2	60S ribosomal protein L14-1 OS=Juglans regia OX=51240 GN=LOC108991213 PE=3 SV=1	20	3	9	3	134	15.7	10.02	27.8	81.9	81.4	80.1	82.8	84.4	82.6	108.6	117.3	115	119.7	122.7	123.5
A0A2I4F957	Peroxidase OS=Juglans regia OX=51240 GN=LOC108996632 PE=3 SV=2	5	1	6	1	318	34.7	7.9	16.67	39.7	43.4	45.8	40.6	40.8	41.5	173.7	167.6	152.9	156.6	144.3	153
A0A6P9EPP9	ABC transporter B family member 25-like OS=Juglans regia OX=51240 GN=LOC108994462 PE=4 SV=1	7	5	5	1	637	68.7	8.05	12.81	156.5	144.1	157.4	122.9	114.3	114	64.8	60.9	69.5	65.5	65.2	64.9
A0A2I4DFY4	chitinase-like protein 2 OS=Juglans regia OX=51240 GN=LOC108979761 PE=4 SV=1	10	2	3	2	355	39.3	7.12	8.35	41	44.4	49.8	45	40.4	43.6	179.4	170.2	164.3	138.8	138.8	144.4
A0A2I4G3Y1	Coproporphyrinogen oxidase OS=Juglans regia OX=51240 GN=LOC109004510 PE=3 SV=1	9	3	4	3	415	46.6	6.76	11.13	70.8	69.8	69.5	74.7	74	72.9	140.6	142.1	134.6	115.8	122.2	113.1
A0A2I4GLU2	Anthranilate synthase OS=Juglans regia OX=51240 GN=LOC109009002 PE=3 SV=1	6	3	5	2	589	65.7	7.36	15.24	89.5	90	86.3	90	89.7	97.9	108.9	111	109.7	110.6	107.4	109.1
A0A2I4EDU3	probable ADP-ribosylation factor GTPase-activating protein AGD9 OS=Juglans regia OX=51240 GN=LOC108988697 PE=4 SV=1	10	4	6	1	401	43.3	8.66	17.76
A0A6P9EPB8	Protein-serine/threonine phosphatase OS=Juglans regia OX=51240 GN=LOC109001007 PE=3 SV=1	9	3	5	1	354	39	5.2	12.17	53.6	58.5	52.1	54.3	51.9	52.2	151.1	139.9	133	171.2	144.8	137.4
A0A2I4GYH4	Serine/threonine protein phosphatase 2A regulatory subunit OS=Juglans regia OX=51240 GN=LOC109011996 PE=3 SV=2	8	5	6	4	500	57.5	6.7	15.13	130.4	132.6	127	116	125.2	129.5	69.5	78	71.4	69.8	73.8	76.7
A0A6P9EI40	PI-PLC X domain-containing protein At5g67130 isoform X1 OS=Juglans regia OX=51240 GN=LOC109009096 PE=4 SV=1	5	2	4	2	455	50	6.61	12.59	66.9	66.4	69.5	86.6	79.6	82.9	140.3	147.2	140.4	101.7	106.6	112.1
A0A2I4EHY2	anthranilate phosphoribosyltransferase OS=Juglans regia OX=51240 GN=LOC108989746 PE=4 SV=1	5	2	2	2	590	65.1	7.53	7.42	80.8	90.7	88.7	80.3	80.6	75.7	123.7	121.4	118.3	110.5	112.1	117
A0A2I4HQS3	UDP-sulfoquinovose synthase, chloroplastic OS=Juglans regia OX=51240 GN=LOC109020494 PE=4 SV=1	7	2	3	2	482	53.9	8.03	14.05	81.1	89.5	87.3	91.4	86.3	90.1	115.8	107.5	109.3	110.7	117.8	113.3
A0A2I4F7E3	UDP-N-acetylglucosamine diphosphorylase 2 isoform X1 OS=Juglans regia OX=51240 GN=LOC108996252 PE=4 SV=1	6	3	7	3	491	54.2	6.18	19.84	51.8	49.9	49.9	47.5	49	47.4	152.9	152.7	141.3	148.8	153.4	155.4
A0A2I4FV28	transmembrane emp24 domain-containing protein p24delta3-like OS=Juglans regia OX=51240 GN=LOC109002284 PE=3 SV=1	18	4	4	2	213	23.6	7.53	8.76	133.2	131	141.3	143.3	138.3	133.4	64.6	64.1	60.9	66.5	63.9	59.6
A0A2I4F2M6	Chlorophyll a-b binding protein, chloroplastic OS=Juglans regia OX=51240 GN=LOC108994925 PE=3 SV=1	11	3	4	3	284	30.9	5.94	13.64	48.3	43.8	44.1	53.5	51.4	53.1	160.4	154.9	157.8	136.4	149.9	146.4
A0A2I4DEM4	rho guanine nucleotide exchange factor 8-like OS=Juglans regia OX=51240 GN=LOC108979377 PE=4 SV=1	4	2	7	2	553	62.3	8.13	14.21	152.8	157.1	154.5	148.9	139.7	144.7	44.7	46.8	53.8	51.4	51.8	53.7
A0A2I4FMN5	(+)-neomenthol dehydrogenase OS=Juglans regia OX=51240 GN=LOC109000478 PE=3 SV=1	12	4	7	4	311	34.7	6.39	20.02	151.3	151.8	165.6	189.7	189.4	191.6	19.9	19.8	25.2	30.5	33	32.2
A0A833WYH8	Uncharacterized protein (Fragment) OS=Juglans regia OX=51240 GN=F2P56_029769 PE=3 SV=1	4	3	5	3	596	65.5	9.19	13.64	70.1	69.9	66.6	59.3	64.2	69.8	113.2	123.8	117.2	145.9	156.2	143.7
A0A6P9E257	inorganic pyrophosphatase TTM2-like isoform X2 OS=Juglans regia OX=51240 GN=LOC109003806 PE=4 SV=1	8	5	5	1	663	74.4	6.96	12.97	171.5	145	172.5	166.5	160.4	164.2	35.1	36.2	47.8	39.8	32.9	28.1
A0A833TMZ3	Peroxidase (Fragment) OS=Juglans regia OX=51240 GN=F2P56_026383 PE=3 SV=1	15	3	4	2	354	38.8	9.26	10.47	45	40.2	44.4	50.2	51	45.8	179.4	179.6	169.1	133.4	127.1	134.8
A0A2I4GKT5	Dolichyl-diphosphooligosaccharide--protein glycotransferase OS=Juglans regia OX=51240 GN=LOC109008749 PE=3 SV=1	7	5	10	5	747	83.8	9.13	23.49	102.6	98.2	97.3	101.7	96.7	102.4	99	99.2	100.7	98.2	102.1	101.9
A0A2I4DGM0	probable acyl-activating enzyme 17, peroxisomal isoform X1 OS=Juglans regia OX=51240 GN=LOC108979949 PE=4 SV=1	4	3	6	2	726	80	6.35	14.67	63.1	62.5	63.4	62.6	65.8	67.8	143.8	144.3	143.3	131.9	125.6	125.9
A0A2I4GHG2	60S ribosomal protein L28-2-like OS=Juglans regia OX=51240 GN=LOC109007896 PE=3 SV=1	20	3	5	3	150	16.8	10.81	12.88	157.3	162.4	162.2	163.4	158.7	164.2	27.6	28.6	33	50.4	47.2	45
A0A2I4EIJ1	Casein kinase II subunit beta OS=Juglans regia OX=51240 GN=LOC108989904 PE=3 SV=1	18	5	6	5	292	32.8	5.57	14.64	102.8	105.3	112.3	123	114.3	114.1	81.1	88.5	88.3	93.6	92.6	84.2
A0A2I4GZS5	Mannosyltransferase OS=Juglans regia OX=51240 GN=LOC109012295 PE=3 SV=1	7	4	7	4	574	65	8.46	16.66	118.7	116.7	118.9	104.4	108.3	95.1	82.5	93.5	89.9	90.1	91.6	90.5
A0A6P9EF25	serine/threonine-protein phosphatase 6 regulatory subunit 3-like isoform X1 OS=Juglans regia OX=51240 GN=LOC108981957 PE=3 SV=1	5	3	4	1	852	93.9	4.69	14.75	94.2	114.2	112.4	125.7	105.8	114.6	96.9	98.2	89	81.6	99.8	67.7
A0A6P9EHA1	nucleoid-associated protein At4g30620, chloroplastic-like OS=Juglans regia OX=51240 GN=LOC108996811 PE=4 SV=1	17	3	5	3	193	21	8.38	14.84	133.1	127.6	126.6	163.5	159.8	156.1	51.7	54.7	55.2	59.4	56.4	55.8
A0A2I4G970	probable prefoldin subunit 2 OS=Juglans regia OX=51240 GN=LOC109005843 PE=3 SV=1	23	3	4	1	148	16.7	5.67	12.67	57.8	79.4	58.5	115.9	85.1	108.2	90.6	124.6	106.8	121.8	110.7	140.6
A0A2I4HWQ6	Guanylate kinase OS=Juglans regia OX=51240 GN=LOC109022206 PE=3 SV=2	7	3	5	3	401	43.8	5.47	13.51	152.6	166.8	163.4	144.3	145	139.4	41.5	44.9	46.4	54.1	52.9	48.6
A0A2I4FIY9	ubiquitin-conjugating enzyme E2 2 OS=Juglans regia OX=51240 GN=LOC108999226 PE=3 SV=1	11	1	3	1	152	17.3	5.58	11.77	71.4	75.4	78.4	87.7	78.9	82	119.9	117.8	120.2	118.1	122.1	127.9
A0A2I4GEX2	probable prefoldin subunit 2 OS=Juglans regia OX=51240 GN=LOC109007287 PE=3 SV=1	20	4	5	2	148	16.5	5.47	14.81	81.5	88.8	81.6	92.9	91.7	92.2	116.9	116.6	116.8	109	105.4	106.7
A0A2I4G5T9	Alanine transaminase OS=Juglans regia OX=51240 GN=LOC109004987 PE=3 SV=2	8	4	6	2	482	52.9	5.38	16.13	85.8	94.9	93.5	90.5	89.7	81.6	105.6	90.9	103.3	125.7	120.5	118
A0A2I4HK06	protein SPIRRIG OS=Juglans regia OX=51240 GN=LOC109018767 PE=4 SV=1	1	4	4	4	3613	402.5	6.24	11.65	110.6	108.9	117.6	92.4	99.3	89	104.7	101.9	115.1	81.1	89	90.1
A0A2I4EUP7	Procollagen-proline 4-dioxygenase OS=Juglans regia OX=51240 GN=LOC108992874 PE=3 SV=2	10	3	5	2	319	35.2	5.68	9.34	130.4	128.4	133.1	125.8	127.7	122.6	78.8	67.6	81	69.1	70	65.7
A0A2I4EBY8	Hexosyltransferase OS=Juglans regia OX=51240 GN=LOC108988198 PE=3 SV=1	7	3	4	3	562	64.6	8.7	12.44	136.3	139.1	152.5	146.4	139.3	151.3	56	54.6	59.9	57.9	52.6	54
A0A2I4EXQ0	rac-like GTP-binding protein RAC2 OS=Juglans regia OX=51240 GN=LOC108993648 PE=3 SV=1	17	3	3	1	197	21.7	9.23	9.27	68.3	67.6	57.6	74	69.1	46.7	162.4	136.2	139.5	134.4	125.1	119.2
A0A2I4G125	zinc finger CCCH domain-containing protein 40-like OS=Juglans regia OX=51240 GN=LOC109003772 PE=4 SV=1	10	5	10	5	516	57.4	7.81	9.21	95	100.7	104.9	102.5	99.1	107.5	101.5	99.8	95.4	100.6	96.7	96.4
A0A2I4ERN1	cytochrome P450 84A1-like isoform X1 OS=Juglans regia OX=51240 GN=LOC108992054 PE=3 SV=1	4	2	5	1	521	58.6	6.55	13.87	46.8	45.9	50	45.3	41.9	45.8	128.2	147.5	142.2	154	181.6	170.7
A0A833USW9	Uncharacterized protein OS=Juglans regia OX=51240 GN=F2P56_021666 PE=4 SV=1	18	3	6	1	200	21.9	6.57	15.04	141.5	119	125.7	109.7	112	108.8	84.9	76.7	86.2	86.9	68.3	80.3
A0A2I4GA15	cytochrome b5, seed isoform OS=Juglans regia OX=51240 GN=LOC109006027 PE=3 SV=1	13	1	5	1	134	14.8	5.3	13.18	62.4	63.5	62.7	80.4	75	78.5	112.5	116	111	142.1	148.7	147.1
A0A2I4F6L0	guanylate-binding protein 4 isoform X2 OS=Juglans regia OX=51240 GN=LOC108996019 PE=4 SV=1	7	4	5	4	509	58.7	6.99	8.33	123.8	123	134	118.8	116.9	120.8	79	68.7	75.7	78.9	79.7	80.6
A0A2I4HVU8	glutelin type-B 5-like OS=Juglans regia OX=51240 GN=LOC109021967 PE=3 SV=2	9	3	7	1	356	38.5	6.02	19.45	160.6	203.8	210.3	118	130.5	169.5	34.5	27.3	37.9	42.3	33.5	31.8
S5R5W1	Phytochrome A (Fragment) OS=Rhoiptelea chiliantha OX=60426 PE=3 SV=1	12	2	2	1	291	32.9	6.14	8.68	64.6	59.3	83.3	66	72.4	93.9	157.7	141.7	119	112.9	129.8	99.4
A0A833WT78	Aspartate kinase OS=Juglans regia OX=51240 GN=F2P56_036162 PE=4 SV=1	6	3	4	1	568	61.8	7.24	10.37	125.4	126	120	125.7	136.4	123.1	67.8	72.4	80.1	82.8	69.2	71.1
A0A2I4E8Y5	hypersensitive-induced response protein 4 OS=Juglans regia OX=51240 GN=LOC108987405 PE=4 SV=1	19	5	7	5	291	32.4	5.57	17.23	110.5	116.5	127.6	118.4	109.2	114.2	90.9	85.6	87.4	80.3	80.7	78.7
A0A6P9DW08	exportin-2-like OS=Juglans regia OX=51240 GN=LOC109016070 PE=3 SV=1	3	3	5	1	980	110	5.66	16.48	62.7	75.9	62.2	59.4	60.9	71	131.3	156	143.7	113.8	125.5	137.7
A0A833UBJ1	Protein disulfide-isomerase (Fragment) OS=Juglans regia OX=51240 GN=F2P56_022321 PE=3 SV=1	8	3	6	1	452	50	7.03	16.53	88.1	84.3	82.8	90.5	92.6	96.6	110.6	98.5	106.7	115.9	113.8	119.4
A0A6P9EEZ0	Alkaline/neutral invertase OS=Juglans regia OX=51240 GN=LOC108984252 PE=3 SV=1	8	3	3	3	549	61.5	5.06	6.4	110	102	117.7	118.1	108.6	113.6	82.5	80	84	86.5	103.9	93.3
A0A2I4FUC1	FT-interacting protein 3-like OS=Juglans regia OX=51240 GN=LOC109002099 PE=3 SV=1	3	2	3	1	775	88.5	9.14	9.44	27.2	26.1	20.8	33.2	26.1	37.1	150.6	157.6	175.7	180.3	177.8	187.6
A0A2I4G9N3	Shikimate dehydrogenase (NADP(+)) OS=Juglans regia OX=51240 GN=LOC109005939 PE=3 SV=1	7	3	4	2	536	58	6.48	11.56	84.5	93.4	72.6	84.3	84.5	82.2	117.6	113.8	117	110.5	117.9	121.9
A0A6P9DZ65	Proline iminopeptidase OS=Juglans regia OX=51240 GN=LOC109008701 PE=3 SV=1	10	4	6	4	400	45.3	5.9	16.26	84.8	87.4	89.4	89.5	89.9	94.3	111.9	109.9	109.8	112.9	110.1	110.1
A0A2I4HU24	Ribosomal protein OS=Juglans regia OX=51240 GN=LOC109021460 PE=3 SV=1	12	3	6	3	216	24.4	9.94	21.35	99.7	94	96.7	95.6	100.8	102.1	90.7	100.7	95	103.1	113	108.7
A0A833TLG4	Methyltransf_11 domain-containing protein OS=Juglans regia OX=51240 GN=F2P56_030543 PE=4 SV=1	8	3	3	3	289	33.1	9.14	9.47	161.7	173.4	177.2	175.3	163.2	170.8	21.8	28.7	31.6	35.1	31	30.2
A0A2I4F8I0	mitochondrial adenine nucleotide transporter ADNT1 isoform X2 OS=Juglans regia OX=51240 GN=LOC108996472 PE=3 SV=1	9	3	4	2	352	38.2	9.55	10.88	115.8	120.4	109.8	167.3	178.1	170	52.4	52.2	61.4	56	57.7	58.9
A0A2I4DDT2	3-ketoacyl-CoA synthase OS=Juglans regia OX=51240 GN=LOC108979165 PE=3 SV=1	5	2	5	2	475	53.5	8.19	14.9	31.8	31.3	33	33	30.6	34.8	228.5	233.9	219.9	107.1	105.1	111
A0A6P9EAU5	alanine--glyoxylate aminotransferase 2 homolog 3, mitochondrial-like OS=Juglans regia OX=51240 GN=LOC108985282 PE=3 SV=1	9	5	8	5	481	52	7.71	17.73	126.5	124.9	126.1	124.3	119.3	121.4	73	72.2	78.3	79.6	76.9	77.6
A0A2I4EBT2	Ubiquitin receptor RAD23 OS=Juglans regia OX=51240 GN=LOC108988169 PE=3 SV=1	11	4	5	1	383	41	4.84	16.89	80.4	98	100.7	97.9	124.5	82.8	95.4	88.8	90.5	147.5	97	96.5
A0A2I4ECU5	Pyrroline-5-carboxylate reductase OS=Juglans regia OX=51240 GN=LOC108988414 PE=3 SV=1	10	2	5	2	275	28.7	7.96	18.03	133	129.9	129.3	146.9	141	141.8	59.2	58.2	64.2	63.2	66.6	66.8
A0A2I4EYM0	Rab3 GTPase-activating protein catalytic subunit OS=Juglans regia OX=51240 GN=LOC108993891 PE=3 SV=1	5	2	2	2	693	77	5.31	8.24	116	101.6	115.5	166.3	152.3	138.2	63.3	72.9	62.1	65.4	71.5	74.8
A0A2I4HX15	glutathione S-transferase DHAR2-like OS=Juglans regia OX=51240 GN=LOC109022303 PE=3 SV=1	9	2	6	2	213	23.8	6.65	17.63	67	60.1	62.7	73.2	71.5	68.4	121	122.8	117	138	148.1	150.2
A0A2I4GNJ9	uncharacterized protein LOC109009459 isoform X1 OS=Juglans regia OX=51240 GN=LOC109009459 PE=4 SV=1	3	3	3	3	1457	156.8	6.54	10.7	85.3	87.7	93	78.2	85.9	83.8	116.3	114.5	107.6	108.7	117.8	121.1
A0A2I4G3G5	Clathrin light chain OS=Juglans regia OX=51240 GN=LOC109004365 PE=3 SV=1	10	4	4	2	315	34.6	5.38	11.79	98	101.9	102.4	109.1	118.5	122.7	101.8	103.4	100.3	81.9	77.8	82.1
A0A2I4EG51	exportin-2 OS=Juglans regia OX=51240 GN=LOC108989271 PE=3 SV=1	4	4	7	2	977	109.3	5.41	18.45	65.4	68.7	67.2	68.2	65.9	64	140.4	134	144.2	128.4	132.4	121.2
A0A2I4EUX7	17.4 kDa class I heat shock protein-like OS=Juglans regia OX=51240 GN=LOC108992929 PE=3 SV=2	19	3	6	1	158	17.9	6.37	13.88	102.1	106	103.3	56.7	53.5	57.7	117.5	125.8	133.1	99.1	126.2	119
A0A834CRY6	Uncharacterized protein OS=Juglans regia OX=51240 GN=F2P56_019330 PE=4 SV=1	6	2	2	2	647	71.9	7.05	7.41	93.5	88.5	87.4	81.7	76.7	80.2	104.7	104.3	113.3	108.9	138.6	122.3
A0A2I4G408	protein SGT1 homolog OS=Juglans regia OX=51240 GN=LOC109004495 PE=3 SV=1	7	2	3	2	359	40.3	5.31	11.16	97.2	98.6	99.9	103.4	97.5	105.7	98.9	98.1	99.7	96.1	106.9	98
A0A833ULG3	Uncharacterized protein OS=Juglans regia OX=51240 GN=F2P56_020033 PE=4 SV=1	5	1	3	1	332	37.2	5.57	11.6	142.1	129.4	139.8	167.7	172.7	167.9	39.7	41.6	43.2	46.7	54.1	54.9
A0A2I4GC10	ATP synthase subunit e, mitochondrial OS=Juglans regia OX=51240 GN=LOC109006562 PE=3 SV=1	36	1	2	1	53	5.5	10.1	8.22
A0A2I4GEV8	uncharacterized protein LOC109007267 OS=Juglans regia OX=51240 GN=LOC109007267 PE=4 SV=2	5	2	2	2	705	79.8	5.06	8.33	145.7	151.9	173	142.2	130.5	126	54.1	55.5	58.1	46.4	59.1	57.5
A0A2I4EH58	GDP-L-fucose synthase OS=Juglans regia OX=51240 GN=LOC108989545 PE=3 SV=1	9	3	6	1	325	36.1	7.61	16.86	102.8	98.8	93.9	89.7	92.1	82.5	100.4	104.8	103.3	108.3	108.5	114.9
A0A833UW95	Elongation factor G, chloroplastic OS=Juglans regia OX=51240 GN=F2P56_020655 PE=3 SV=1	7	4	4	4	702	77.4	5.17	8.31	69	71.2	76.9	78.7	89.3	82.8	118.1	119.7	117.4	118.1	126.5	132.3
A0A2I4DY59	Peptide deformylase OS=Juglans regia OX=51240 GN=LOC108984533 PE=3 SV=1	9	2	3	2	253	28.5	9.2	9.52	82.4	89.7	91.1	96.2	114.4	102.1	100.6	100.8	96.2	98.8	104.2	123.4
A0A2I4GDU7	transmembrane emp24 domain-containing protein p24delta3-like OS=Juglans regia OX=51240 GN=LOC109007037 PE=3 SV=2	13	3	3	1	222	24.8	6.95	8.83	169.9	159.4	160.6	149.2	151.2	164.1	30.2	41.6	36.9	43.4	44.9	48.8
A0A6P9EJE1	diacylglycerol kinase OS=Juglans regia OX=51240 GN=LOC109004867 PE=3 SV=1	6	2	2	2	490	54.3	6.39	7.03	167.2	144.7	147.1	131.8	151.3	143.1	42.6	53.3	57.6	57.5	53.6	50.2
A0A2I4ETN9	RNA-binding protein 38-like isoform X1 OS=Juglans regia OX=51240 GN=LOC108992616 PE=4 SV=1	12	3	5	2	276	29.9	8.98	13.64	102.5	98.9	100.1	92.9	90.1	90.3	106.2	105.9	101.8	98.9	104.8	107.5
A0A2I4E3C5	proteasome activator subunit 4-like OS=Juglans regia OX=51240 GN=LOC108985890 PE=3 SV=1	2	3	3	3	1815	204.2	7.08	11.36	88.4	89.3	89.9	86.4	76.6	85.1	113.2	122.1	120.8	101.1	115	112.1
A0A2I4GJJ4	UDP-glucuronate 4-epimerase 6 OS=Juglans regia OX=51240 GN=LOC109008440 PE=4 SV=1	7	3	4	2	459	50.7	9.48	12.59	38.1	49.4	40.8	46.4	34.7	41.8	184	170.7	182.9	127.3	141.5	142.5
A0A2I4GKR5	Biotin synthase OS=Juglans regia OX=51240 GN=LOC109008739 PE=3 SV=1	14	4	4	4	376	41.6	6.73	13.56	96.3	96.1	97.1	106.3	112.2	103.3	83.6	86.6	92.6	104.3	110.7	110.9
A0A6P9EDU6	nuclear transport factor 2A isoform X1 OS=Juglans regia OX=51240 GN=LOC108980547 PE=4 SV=1	16	2	5	2	146	16.2	6.92	17.18	107.5	111.5	114.6	94.9	92.8	94.2	108.3	101.8	96.5	111.3	80.9	85.6
A0A2I4EBP9	THO complex subunit 4D OS=Juglans regia OX=51240 GN=LOC108988140 PE=4 SV=1	9	2	3	2	282	30.6	11.33	10.94	110.9	103.5	113.2	105	94.6	96.3	101.2	93.2	91	105.5	91	94.6
A0A2I4DXD5	Eukaryotic translation initiation factor 3 subunit K OS=Juglans regia OX=51240 GN=LOC108984337 PE=3 SV=2	16	4	8	4	229	26.3	5.6	18.97	108.7	104.4	99.3	112.4	110.6	107.7	89.2	90.2	93.7	94.4	93.6	95.7
A0A2I4EM84	Hydroxymethylglutaryl-CoA synthase OS=Juglans regia OX=51240 GN=LOC108990864 PE=3 SV=1	4	2	9	2	468	51.8	6.47	15.31	168.3	173.2	162.1	135.5	135.9	138.4	46	43.1	46.3	50.3	52.1	48.9
A0A2I4GCC2	glycerol-3-phosphate acyltransferase 9 OS=Juglans regia OX=51240 GN=LOC109006642 PE=3 SV=1	9	2	2	2	374	43.1	8.84	8.32	82.5	73.4	72	67.3	59.8	63.8	124.1	124.3	133.5	132.6	128.7	138.2
A0A6P9EHL3	uncharacterized protein LOC109021701 OS=Juglans regia OX=51240 GN=LOC109021701 PE=4 SV=1	14	2	4	2	155	17.4	6.34	15.04	28.1	30.8	33.1	34.4	38.6	34	187.1	186	184.7	147.2	147.2	148.8
A0A2I4FA26	ubiquitin-conjugating enzyme E2-17 kDa-like OS=Juglans regia OX=51240 GN=LOC108996917 PE=3 SV=1	26	2	6	2	148	16.4	7.4	16	91.8	88	91	92.4	95.2	92.7	101.7	104	102.4	113.5	115.5	111.8
A0A2I4H8K5	serine/threonine-protein kinase BSK7-like isoform X1 OS=Juglans regia OX=51240 GN=LOC109014463 PE=3 SV=1	10	4	5	2	488	54.5	6.11	15.84	56.1	56.5	56.6	53.9	55	53.6	159.1	143.3	157.8	133.3	136.9	137.7
A0A2I4HVW1	probable eukaryotic translation initiation factor 5-1 OS=Juglans regia OX=51240 GN=LOC109021983 PE=3 SV=2	8	3	3	1	446	49.4	6.89	10.21	132.8	130.6	141.6	198	199.7	209.4	26	26.9	27.6	35.2	37.4	34.9
A0A2I4FXL7	serine/threonine-protein kinase BSK1-like OS=Juglans regia OX=51240 GN=LOC109002918 PE=3 SV=1	7	3	3	1	525	59	6.57	9.86	40	40.1	37	39.6	42.1	30.8	192	207.4	162.8	145.2	140.2	122.8
A0A833WXW0	Uncharacterized protein OS=Juglans regia OX=51240 GN=F2P56_030699 PE=3 SV=1	14	3	6	3	201	22.9	9.39	17.21	39.9	41.3	41.8	53.2	53.8	55.1	155.2	156.7	150.8	153.3	151.8	147.2
A0A2I4E8Y7	BAG family molecular chaperone regulator 7-like OS=Juglans regia OX=51240 GN=LOC108987414 PE=4 SV=1	7	3	6	3	425	48.3	9.32	17.62	59.7	57.7	58	71.9	66	69.4	125.7	133.4	130.3	141.2	143.1	143.6
A0A2I4EHJ2	tetraspanin-3-like OS=Juglans regia OX=51240 GN=LOC108989646 PE=4 SV=1	4	2	6	2	284	32	8.54	16.17	26.7	30.4	30.3	34.6	36.8	42	179.9	188.1	172.4	146.6	156.9	155.2
A0A2I4F3C0	calcium-binding protein 39 OS=Juglans regia OX=51240 GN=LOC108995089 PE=3 SV=1	10	2	2	2	339	38.9	6.37	6.99	81.9	87.1	78.6	68.7	71.4	71.8	124.8	128	126.8	112.8	121.3	126.7
A0A833XV56	Uracil phosphoribosyltransferase OS=Juglans regia OX=51240 GN=F2P56_008401 PE=3 SV=1	14	4	5	4	285	31.2	8.84	11.76	83	88.2	90.7	98.3	97.6	92.2	110.7	113.2	105.8	117.5	97.2	105.5
A0A2I4HNA2	3-ketoacyl-CoA synthase OS=Juglans regia OX=51240 GN=LOC109019693 PE=3 SV=1	11	5	6	3	509	57.2	9.25	10.26	124	133.2	127.4	103.5	97.6	104.6	91.1	87.9	90	76.8	83.6	80.2
A0A2I4H080	WEB family protein At3g02930, chloroplastic-like OS=Juglans regia OX=51240 GN=LOC109012402 PE=3 SV=1	6	4	4	2	843	95.2	4.92	8.34	62.1	65.7	67.5	69	72.2	65.7	197	183.7	174.8	84.3	79.6	78.4
A0A833TZN3	Lipoxygenase OS=Juglans regia OX=51240 GN=F2P56_037215 PE=3 SV=1	6	4	6	4	690	77.3	8.21	16.11	41.5	38.8	39.4	41.6	38.6	37	170.4	177.4	163.1	147.2	155.5	149.4
A0A833TLI6	Uncharacterized protein OS=Juglans regia OX=51240 GN=F2P56_030570 PE=4 SV=1	6	2	5	2	249	27.1	7.85	15.89	72.5	71.5	64.5	64.8	62	67.1	126	122.1	123.1	142.9	141.3	142.1
A0A2I4DF77	protein WEAK CHLOROPLAST MOVEMENT UNDER BLUE LIGHT 1-like OS=Juglans regia OX=51240 GN=LOC108979554 PE=3 SV=1	3	3	5	3	869	96.2	5.19	9.17	159.3	154.3	162	171.6	157.8	166.7	35	33.1	38.7	38.2	40.9	42.5
A0A6P9EWR4	Protein CASP OS=Juglans regia OX=51240 GN=LOC109010742 PE=3 SV=1	5	4	8	4	684	79.2	5.49	18.51	136	138.1	134.7	141.5	134.3	141.3	63.1	65	68.9	56.9	60.1	60.2
A0A2I4DI03	ERAD-associated E3 ubiquitin-protein ligase component HRD3A OS=Juglans regia OX=51240 GN=LOC108980347 PE=4 SV=2	6	4	6	4	686	76.8	6.13	13.27	118.1	114.2	114	106.2	107.7	106.4	91	87	86.5	89.5	89.8	89.6
A0A2I4E4D2	uncharacterized protein LOC108986177 OS=Juglans regia OX=51240 GN=LOC108986177 PE=4 SV=2	1	4	5	4	4260	475.9	7.08	9.93	102.6	106.8	108.8	115.9	107.5	105.4	79.4	97.4	102.2	93.1	87	94
A0A2I4DS22	IAA-amino acid hydrolase ILR1-like 4 OS=Juglans regia OX=51240 GN=LOC108982914 PE=3 SV=1	3	1	2	1	445	49	6.21	7.96	79	82.4	73.7	86.3	88.4	98.4	108.3	110.7	114.4	112.3	117.2	128.9
A0A2I4GKK8	Glutamyl-tRNA(Gln) amidotransferase subunit B, chloroplastic/mitochondrial OS=Juglans regia OX=51240 GN=LOC109008697 PE=3 SV=1	7	4	5	4	553	61.5	8.47	12.58	94.3	102.5	102	92.5	96.2	95.2	107.7	99.8	105.9	96	101.5	106.5
A0A2I4GTA2	cytochrome P450 84A1-like OS=Juglans regia OX=51240 GN=LOC109010690 PE=3 SV=1	4	3	5	2	514	58.1	6.77	14.55	47.9	51.6	46.9	121.2	117.5	128.4	112.7	111.7	105.2	118.8	119.9	118.2
A0A6P9F3Z5	Pyridoxal kinase OS=Juglans regia OX=51240 GN=LOC109021107 PE=3 SV=1	8	2	5	2	308	34	6.3	17.32	100.2	92	91.2	100.8	108.9	97.2	107.4	111.5	109	82.4	99.2	100.1
A0A2I4GUQ1	Shikimate dehydrogenase (NADP(+)) OS=Juglans regia OX=51240 GN=LOC109011053 PE=3 SV=1	6	3	4	2	530	57.6	6.7	10.84	74.6	80.5	81	79.6	84.4	81.9	122.7	118.1	116.1	118.3	122.9	119.9
A0A2I4GER0	Polyribonucleotide nucleotidyltransferase OS=Juglans regia OX=51240 GN=LOC109007251 PE=3 SV=2	5	4	5	4	968	105.9	6.06	15.08	119.6	133.8	143.7	124.9	133.6	134.9	74.1	65.9	70.8	67.6	66.7	64.3
A0A2I4EN51	(DL)-glycerol-3-phosphatase 2 OS=Juglans regia OX=51240 GN=LOC108991129 PE=4 SV=1	8	1	2	1	241	26.5	5.94	8.83	98.6	103.2	98.3	151.5	135.3	139.4	66	76.3	81.7	75.2	86.5	88
A0A2I4E1V7	60S ribosomal protein L27 OS=Juglans regia OX=51240 GN=LOC108985511 PE=3 SV=1	14	2	9	2	135	15.7	10.51	23.86	163.2	152.1	157.9	139.8	144	141.2	40.1	41.8	43.6	60.4	57.4	58.4
A0A2I4FA64	glutathione S-transferase zeta class-like isoform X1 OS=Juglans regia OX=51240 GN=LOC108996938 PE=3 SV=2	6	1	2	1	225	25.4	6.7	8.45	56.9	51.6	57.3	57.7	62.3	59.6	136.9	139.3	123.5	142.9	157.1	155
A0A2I4HUJ4	Laccase OS=Juglans regia OX=51240 GN=LOC109021622 PE=3 SV=1	7	3	4	2	558	60.8	8.37	8.77	53.1	55	46.8	58.5	55.9	52.9	142.7	142.4	144.5	155.9	140	152.3
A0A2I4E1S7	uncharacterized protein At2g24330-like isoform X1 OS=Juglans regia OX=51240 GN=LOC108985494 PE=4 SV=1	12	5	5	3	412	45.6	6.96	14.08	97.9	99	101.3	111.2	109.2	111	94	89.1	93	97.9	103.3	93
A0A2I4F557	putative clathrin assembly protein At5g35200 OS=Juglans regia OX=51240 GN=LOC108995650 PE=4 SV=1	8	4	5	4	545	60.6	6.38	11.62	132.7	128.1	132.9	125.3	119.7	130.2	75.4	72.6	78.2	67.5	70.6	66.8
A0A6P9ENJ5	zinc finger BED domain-containing protein DAYSLEEPER-like isoform X1 OS=Juglans regia OX=51240 GN=LOC108990925 PE=4 SV=1	5	4	5	4	925	104.4	5.01	12.88	70.3	68.4	71.3	73.6	66.3	70.1	120.7	111.8	112.8	139.2	151.9	143.9
A0A2I4GES6	glutaredoxin-like OS=Juglans regia OX=51240 GN=LOC109007255 PE=3 SV=1	16	1	3	1	107	11.3	7.87	12.9	129.4	129.7	127.3	213.8	221.9	208.5	18.6	20.7	25.9	37.4	32.2	34.7
A0A6P9EDN2	fimbrin-2 OS=Juglans regia OX=51240 GN=LOC108988970 PE=4 SV=1	6	3	5	1	666	75.1	7.31	13.39	146.8	128.4	149.8	135.1	121.7	123.2	75.1	70.4	67.2	58.4	64.7	59.3
A0A2I4EYP6	isoaspartyl peptidase/L-asparaginase-like OS=Juglans regia OX=51240 GN=LOC108993925 PE=4 SV=1	8	1	1	1	315	33.2	5.41	6.46	27.4	29	33.4	36.3	43.4	32	180.1	166.5	157.7	162.1	163.7	168.5
A0A2I4EPY8	Acetohydroxy-acid synthase small subunit OS=Juglans regia OX=51240 GN=LOC108991601 PE=3 SV=1	8	4	6	2	479	52.9	8.21	18.8	99.4	104.1	99.9	105.4	107.2	103.9	95.2	99.1	93.7	100.7	95.1	96.3
A0A2I4E987	Vacuolar protein sorting-associated protein 28 homolog OS=Juglans regia OX=51240 GN=LOC108987490 PE=3 SV=1	10	2	3	2	209	23.3	5.47	10.07	92.6	97.1	97.8	108.5	99.3	100	104.4	107.8	111.7	96.7	94.8	89.3
A0A2I4GPP6	ectonucleotide pyrophosphatase/phosphodiesterase family member 3 OS=Juglans regia OX=51240 GN=LOC109009725 PE=4 SV=1	6	3	6	3	497	54.6	5.87	7.06	62.7	67.6	62.1	57.2	54.4	56.5	134.1	140.1	146.3	140.1	138.6	140.4
A0A2I4GC46	ER lumen protein-retaining receptor erd-2.2-like isoform X1 OS=Juglans regia OX=51240 GN=LOC109006567 PE=3 SV=1	13	3	4	3	272	30.8	8.91	11.22	98.8	93.3	100.7	86	97	86.7	103.1	102.9	100	119.3	105.5	106.6
A0A2I4GYP4	syntaxin-52-like isoform X1 OS=Juglans regia OX=51240 GN=LOC109012033 PE=4 SV=1	12	3	5	3	276	30.5	9.11	13.69	98.8	106.9	106.2	127.8	110.3	132.8	99.9	95.3	108.2	69	68.8	76.1
A0A2I4DTT7	10 kDa chaperonin-like OS=Juglans regia OX=51240 GN=LOC108983404 PE=3 SV=2	16	1	5	1	97	10.5	8.4	11.54	95	98.2	89.9	103.4	100.8	110.2	97.7	106.4	100.6	100.7	102.6	94.6
A0A2I4DK85	ubiquitin-conjugating enzyme E2 variant 1A-like OS=Juglans regia OX=51240 GN=LOC108980955 PE=4 SV=1	14	3	5	3	159	18.1	5.07	11.06	93.3	87.9	88.4	106.2	105.5	106.6	108.7	110.6	112.8	92.9	93.6	93.4
A0A2I4HQY6	Protein transport protein sec16 OS=Juglans regia OX=51240 GN=LOC109020539 PE=3 SV=2	3	4	5	4	1437	155.3	5.06	14.17	135.9	127.1	129.9	151.4	141.6	139.2	67.3	56.9	67.6	58.9	61.6	62.5
A0A2I4FDF6	2-methyl-6-phytyl-1,4-hydroquinone methyltransferase, chloroplastic-like OS=Juglans regia OX=51240 GN=LOC108997758 PE=3 SV=1	10	3	4	3	340	38.4	9.32	11.78	71.2	75.3	66.6	69.6	61.8	67.4	138.9	130.8	122.3	133.5	134.4	128.2
A0A2I4DJB3	Eukaryotic translation initiation factor 3 subunit F OS=Juglans regia OX=51240 GN=LOC108980687 PE=3 SV=1	11	3	4	1	285	31.2	5.33	14.51	86.1	95	123.6	125.9	107.6	106.7	77.7	97.3	76.5	102.1	96.5	105.1
A0A2I4G8P7	60S ribosomal protein L26-1 OS=Juglans regia OX=51240 GN=LOC109009362 PE=3 SV=1	21	5	7	5	146	16.7	10.9	18.59	159.5	158.9	153.5	128.4	134.3	124.5	46.4	47.8	50.2	68.6	66.1	61.8
A0A2I4FW67	nudix hydrolase 25 OS=Juglans regia OX=51240 GN=LOC109002545 PE=3 SV=1	21	2	2	2	173	19.5	4.84	7.83	90.2	95.6	98.3	109.8	117.9	107.7	102.6	114.1	107.2	81.9	90.9	83.7
A0A2I4EJ11	NADH dehydrogenase [ubiquinone] 1 alpha subcomplex subunit 1 OS=Juglans regia OX=51240 GN=LOC108990011 PE=3 SV=1	20	1	6	1	66	7.4	8.84	13.45	105.3	97.1	97.7	100.9	97.5	97.5	101.3	106.6	99.6	101.3	93.8	101.4
A0A2I4GQI7	protein NPG1-like OS=Juglans regia OX=51240 GN=LOC109009953 PE=4 SV=1	4	2	2	2	695	77.2	5.49	6.64	156.2	156.5	158.9	169.8	161.8	154.7	33.4	38	42	41.3	45.4	42
A0A2I4E2I9	C-factor-like OS=Juglans regia OX=51240 GN=LOC108985680 PE=4 SV=1	15	5	6	5	297	32.5	9.41	14.06	80.9	78.2	82.9	78.5	80.4	81.9	143.3	144.1	144	99.5	94.1	92.2
A0A2I4H748	40S ribosomal protein S20-2-like OS=Juglans regia OX=51240 GN=LOC109014100 PE=3 SV=1	20	5	7	5	122	13.7	9.63	19.1	70.9	70.8	69.3	68.2	65.6	65.2	124.7	125.9	120.6	138.2	141	139.5
A0A833X3C2	Uncharacterized protein OS=Juglans regia OX=51240 GN=F2P56_021998 PE=4 SV=1	3	4	7	2	1372	154.8	4.84	16.07	23.9	30.5	25	26.4	34.6	30.9	175.9	183.4	194.1	166	152.1	157.1
A0A2I4GNW9	Translation machinery-associated protein 22 OS=Juglans regia OX=51240 GN=LOC109009536 PE=3 SV=1	9	3	4	3	190	21	7.64	12.01	120.3	121.9	127.9	118.9	116.5	112.5	83.1	85.8	82.9	85	71.4	73.8
A0A833Y306	Uncharacterized protein OS=Juglans regia OX=51240 GN=F2P56_003308 PE=3 SV=1	12	3	7	1	217	24.6	10.15	19.04	113	112.2	112	119.4	123.6	124	55.5	57.7	60.1	115.3	103.9	103.3
A0A2I4HKK9	nuclear export mediator factor Nemf isoform X1 OS=Juglans regia OX=51240 GN=LOC109018891 PE=3 SV=2	3	3	4	1	1147	127.7	6.71	12	98	101.4	100.9	97.6	87.5	94.7	111.2	106.7	103.7	105	97.5	95.7
A0A2I4FKN0	vacuolar fusion protein CCZ1 homolog B-like isoform X2 OS=Juglans regia OX=51240 GN=LOC108999745 PE=3 SV=1	7	3	4	3	513	57.2	6.07	10.96	86.8	94.1	93.6	94.2	87.8	91.6	108.7	111	106.6	106.6	112.1	106.9
A0A2I4EP67	2-oxoglutarate-Fe(II) type oxidoreductase hxnY-like isoform X2 OS=Juglans regia OX=51240 GN=LOC108991406 PE=3 SV=1	4	1	4	1	336	38.1	5.22	12.81	125.9	133.1	130	126.7	123.6	115.1	68.5	65.2	66.9	79.9	84.6	80.7
A0A2I4GLR8	Chorismate synthase OS=Juglans regia OX=51240 GN=LOC109008978 PE=3 SV=1	7	3	6	3	445	48.2	7.5	17.65	46.9	44.8	46.3	54.2	49.4	55	130.9	127.4	126.2	177.9	168.1	172.8
A0A833XBD4	Uncharacterized protein OS=Juglans regia OX=51240 GN=F2P56_019266 PE=3 SV=1	6	5	6	1	958	106	6.61	15.21	164.6	157.9	153.6	165.8	153.1	153.8	47.7	35.8	43.5	44.1	42.2	38
A0A2I4FN42	receptor-like protein kinase FERONIA OS=Juglans regia OX=51240 GN=LOC109000586 PE=4 SV=1	4	3	4	2	896	97.6	6.51	8.54	75.7	72.2	77.3	83.8	81.2	77.1	129.2	133.2	137.9	112.5	108.7	111.2
A0A833TQK6	NAC-A/B domain-containing protein OS=Juglans regia OX=51240 GN=F2P56_030866 PE=4 SV=1	12	2	3	1	260	28.6	4.7	11.97	134.9	133.4	127.4	191.4	190.6	192	28.6	32.7	35.6	45.7	42.7	45
A0A2I4GRZ4	4-hydroxy-tetrahydrodipicolinate synthase OS=Juglans regia OX=51240 GN=LOC109010324 PE=3 SV=2	5	3	5	2	359	39.5	6.6	12.13	70.8	69.3	71	79.5	77.9	72.9	134.9	131.2	132.3	113.7	124.1	122.4
A0A2I4HJI5	methylcrotonoyl-CoA carboxylase subunit alpha, mitochondrial isoform X1 OS=Juglans regia OX=51240 GN=LOC109018530 PE=4 SV=1	5	3	4	3	737	81	6.68	10.86	92.4	89	94.1	91.7	78.4	88.5	112	117.5	123	106.7	105.8	101
A0A2I4DVQ6	costars family protein OS=Juglans regia OX=51240 GN=LOC108983899 PE=3 SV=1	13	1	2	1	98	10.6	5.24	8.29	60.6	57.5	49.5	89.7	87	77.6	114.6	111.5	104.9	152.4	139	155.7
A0A2I4FHP3	4-coumarate--CoA ligase 2-like OS=Juglans regia OX=51240 GN=LOC108998879 PE=4 SV=1	7	4	5	1	542	59.6	5.9	12.36	13.6	19.8	14.9	14.8	31.7	23.9	170.3	177.5	187.8	181.4	178.2	185.9
A0A2I4GCJ6	damage-control phosphatase At2g17340-like OS=Juglans regia OX=51240 GN=LOC109006669 PE=4 SV=1	8	3	3	3	367	40.9	5	7.03	115.8	88.9	95.1	100.8	102.9	97.7	96.3	95.3	95.7	98.9	107.1	105.4
A0A2I4FF79	mitochondrial uncoupling protein 5-like OS=Juglans regia OX=51240 GN=LOC108998260 PE=3 SV=1	5	1	2	1	331	35.2	9.99	7.65	109.9	129.6	107.1	146.2	152.1	135.6	76.2	60.7	80.6	68.3	62.5	71.2
A0A2I4ER79	Laccase OS=Juglans regia OX=51240 GN=LOC108991934 PE=3 SV=2	6	2	4	2	580	63.7	7.69	8.16	50.6	51.6	50	53.7	53.9	57.5	139.9	133.3	133	165.4	154.5	156.4
A0A2I4FQX6	Alpha-mannosidase OS=Juglans regia OX=51240 GN=LOC109001290 PE=3 SV=1	4	3	4	3	1017	114.7	6.13	14.07	70.5	72.8	68.6	64.7	61.1	62.3	140.3	133.7	136.7	125.6	135.2	128.5
A0A2I4H3P3	splicing factor SF3a60 homolog OS=Juglans regia OX=51240 GN=LOC109013211 PE=3 SV=1	8	3	3	3	510	59.7	5.26	7.96	83.7	79	92.4	95.7	102.9	90.5	103.9	108.8	107.4	111	118.6	106
A0A2I4FQW1	uncharacterized protein LOC109001283 isoform X4 OS=Juglans regia OX=51240 GN=LOC109001283 PE=4 SV=1	5	2	3	1	483	56.2	6.57	8.97	95.3	97.5	92.7	106.2	108	108.7	87.7	95	96.4	101.9	105.6	105.1
A0A2I4FCC3	Glutamate--tRNA ligase OS=Juglans regia OX=51240 GN=LOC108997449 PE=3 SV=1	8	4	4	4	577	64.4	7.58	11.7	113.8	116.1	111.3	111.8	119	119.5	84.6	83.1	91.1	81.9	86.1	81.6
A0A2I4DV86	5-amino-6-(5-phosphoribosylamino)uracil reductase OS=Juglans regia OX=51240 GN=LOC108983526 PE=4 SV=1	6	3	5	3	548	59.4	6.73	10.98	76.9	73.5	77.5	85.4	77.2	81.3	120.9	124.8	124.9	116.2	124	117.4
A0A2I4FJM3	RAB6-interacting golgin OS=Juglans regia OX=51240 GN=LOC108999404 PE=3 SV=1	10	3	4	3	190	21.9	5.44	11.19	44.1	41.7	43.6	41	43.7	43.7	198.2	183.6	171.4	131.7	131.6	125.7
A0A833XPL0	Uncharacterized protein (Fragment) OS=Juglans regia OX=51240 GN=F2P56_009871 PE=4 SV=1	8	2	5	2	325	34.9	6.95	17.81	109.9	115.3	109.2	106.4	106.3	112.9	90.7	84.9	91.7	88.2	93.2	91.4
A0A2I4FJC9	E2 ubiquitin-conjugating enzyme OS=Juglans regia OX=51240 GN=LOC108999301 PE=3 SV=1	14	3	6	3	194	21.1	4.75	18.13	71.1	71.2	74.1	78.5	78.1	77.8	128.7	123.2	124.2	119.5	127.9	125.6
A0A2I4DGM7	Eukaryotic translation initiation factor 6 OS=Juglans regia OX=51240 GN=LOC108979950 PE=3 SV=1	17	2	4	2	245	26.5	4.81	12.9	80	85.2	78.1	73.3	79.3	70.4	119.2	109.1	99.9	151.6	124.5	129.4
A0A2I4GCD1	ubiquitin domain-containing protein DSK2a-like OS=Juglans regia OX=51240 GN=LOC109006649 PE=4 SV=1	5	2	2	1	559	59.4	4.92	8.44	98	109.6	101.9	134.1	150.3	142.5	74.7	79.2	89.6	71.9	73	75.2
A0A834CS95	Uncharacterized protein OS=Juglans regia OX=51240 GN=F2P56_014372 PE=3 SV=1	4	1	5	1	322	34.4	6.96	14.02	9.4	10.8	10.7	9.8	11.4	11.7	241.2	236.9	232.6	145.4	136.8	143.3
A0A2I4F803	carbamoyl-phosphate synthase small chain, chloroplastic OS=Juglans regia OX=51240 GN=LOC108996366 PE=3 SV=1	6	3	6	3	431	47	6.47	12.48	85.4	89.7	89.3	94.2	91.5	80.4	111.5	109.6	101.6	126.6	110.4	109.8
A0A2I4G4C1	uncharacterized protein LOC109004583 OS=Juglans regia OX=51240 GN=LOC109004583 PE=4 SV=1	9	3	4	2	323	36.7	7.88	12.45	113.6	116.6	106.7	105.2	114.6	110.8	90.8	97	93.4	84.9	82.3	84.2
A0A2I4EQU0	biotin carboxyl carrier protein of acetyl-CoA carboxylase-like OS=Juglans regia OX=51240 GN=LOC108991825 PE=4 SV=1	9	2	3	2	288	30.2	8.07	9.84	109.7	102.9	104.8	121.7	125.2	130.6	87.7	86.1	90.8	80.4	84	76.2
A0A834CTU1	Uncharacterized protein OS=Juglans regia OX=51240 GN=F2P56_012014 PE=3 SV=1	9	3	3	1	423	48.6	6.74	8.84	103.8	84	113.1	121	108.5	110.1	96.2	91.5	92.3	92.9	102.3	84.3
A0A2I4EWN7	transportin-1-like OS=Juglans regia OX=51240 GN=LOC108993375 PE=4 SV=1	3	3	4	1	893	99.2	5.12	9.63	35.3	32	34.5	33.5	33.5	35.3	171.4	164.7	156.3	167.8	165	170.6
A0A834CVI4	Uncharacterized protein (Fragment) OS=Juglans regia OX=51240 GN=F2P56_015762 PE=3 SV=1	12	3	4	3	394	43.9	9.58	8.67	90.1	92.1	87.6	105.5	90.9	95.5	117.7	118.9	103.7	94.9	98.7	104.5
A0A2I4HEF7	FACT complex subunit SSRP1 OS=Juglans regia OX=51240 GN=LOC109016617 PE=3 SV=1	6	4	5	4	643	72	5.71	13.89	94.1	104	97.3	114	118.5	117.3	79.6	90.1	87.1	93.1	104.3	100.8
A0A2I4EM58	sugar transport protein 12-like OS=Juglans regia OX=51240 GN=LOC108990836 PE=3 SV=2	2	1	3	1	523	57.6	8.24	9.84	114.3	107.4	112	241.1	229.1	240.3	18.1	18.7	35.8	27	28.9	27.2
A0A2I4EHC9	molybdate-anion transporter-like OS=Juglans regia OX=51240 GN=LOC108989590 PE=4 SV=1	7	4	9	4	459	50.5	7.15	22.27	138	139.3	129.6	146.1	142.1	147.3	59	52	63.3	64.4	59.4	59.5
A0A833WTG3	Uncharacterized protein OS=Juglans regia OX=51240 GN=F2P56_033742 PE=3 SV=1	8	3	3	1	544	62.2	6.61	9.39	121.3	119.5	120.1	124.7	118.1	122.5	87.4	91.1	88.9	64.3	70.7	71.6
A0A6P9EBF2	vacuolar protein sorting-associated protein 52 A-like isoform X1 OS=Juglans regia OX=51240 GN=LOC109001385 PE=3 SV=1	6	4	4	1	708	81	5.71	10.69	104.6	105	111.8	106.3	94.7	117.5	106.2	95.1	94.2	90.8	88.5	85.4
A0A2I4EVA9	GDP-L-fucose synthase OS=Juglans regia OX=51240 GN=LOC108993031 PE=3 SV=1	7	3	5	1	326	36.1	6.61	14.28	83.5	88	87.8	81.5	82	83.4	115.7	117.5	114.5	113.2	115.8	117.2
A0A2I4DLU5	Peroxidase OS=Juglans regia OX=51240 GN=LOC108981424 PE=3 SV=1	12	3	4	3	314	33.6	9.48	7.49	43.6	42.5	41.1	45.3	46.6	46.7	217	209.7	198	109.2	95.1	105.3
A0A2I4E318	Ubiquitin receptor RAD23 OS=Juglans regia OX=51240 GN=LOC108985792 PE=3 SV=1	5	2	3	1	374	39.7	4.63	9.44	88.8	76.4	79.8	83.5	95.3	92.8	115.1	110.1	119.1	111.4	115.1	112.5
A0A2I4E883	ATPase family AAA domain-containing protein 3-like OS=Juglans regia OX=51240 GN=LOC108987182 PE=3 SV=1	9	6	6	3	626	69.9	8.97	12.45	101.1	109.9	122.5	98.9	116.5	110.1	89.8	88.8	102	86.5	93.8	80.2
A0A833UH90	ADF-H domain-containing protein OS=Juglans regia OX=51240 GN=F2P56_021910 PE=3 SV=1	17	2	8	1	130	15.1	5.22	25.23	208.9	190.1	188.5	167.5	181.3	175.8	9	11.1	16.9	17.1	16	17.9
A0A2I4HKD2	nuclear export mediator factor NEMF isoform X2 OS=Juglans regia OX=51240 GN=LOC109018891 PE=3 SV=2	3	3	4	1	1010	112.3	6.33	11.65
A0A6P9E937	guanine nucleotide exchange factor SPIKE 1 isoform X2 OS=Juglans regia OX=51240 GN=LOC109011251 PE=3 SV=1	4	7	7	7	1820	206	6.13	11.18	70.1	70.2	73.4	77.5	70.8	77.1	132.8	127.2	130.3	119.3	122.7	128.6
A0A2I4GWD3	ATP synthase subunit delta', mitochondrial-like OS=Juglans regia OX=51240 GN=LOC109011451 PE=3 SV=1	9	2	6	1	199	21.3	6.7	19.71	118.1	111.7	112.5	133.5	140.9	135.4	80.2	80.4	79.6	72.9	68.9	66.1
A0A6P9ED69	ATP-dependent zinc metalloprotease FTSH 11, chloroplastic/mitochondrial isoform X3 OS=Juglans regia OX=51240 GN=LOC108982624 PE=3 SV=1	6	3	4	3	824	90.6	6.96	9.76	110.5	109.6	119.7	127.3	112.4	129.8	82.5	78	80.8	77.1	84.1	88.3
A0A2I4EZX8	probable cinnamyl alcohol dehydrogenase 9 OS=Juglans regia OX=51240 GN=LOC108994266 PE=3 SV=1	9	2	14	2	359	39	6.84	33.43	86.6	84.3	80.1	90.3	93.1	91.3	124.2	129.8	122.6	100.6	100	97.1
A0A2I4FBV8	calnexin homolog OS=Juglans regia OX=51240 GN=LOC108997363 PE=3 SV=1	3	2	8	2	550	62.2	4.86	20.66	124.4	146.2	157.2	130.5	140.3	146.2	64.3	60.9	59.7	62.8	54.5	53
A0A2I4EN66	NADPH--cytochrome P450 reductase OS=Juglans regia OX=51240 GN=LOC108991146 PE=3 SV=2	6	4	6	2	708	78.3	5.39	15.54	51.5	48.9	53.2	47.2	47.4	48	150.9	150.3	151.5	150.6	150.5	150
A0A2I4GXF3	Glycylpeptide N-tetradecanoyltransferase OS=Juglans regia OX=51240 GN=LOC109011722 PE=3 SV=2	9	4	6	4	434	49.9	6.8	14.27	117.2	117.4	116.8	109.8	99.4	107.2	83.1	80.5	87	93	95	93.7
A0A2I4ETK3	clathrin interactor EPSIN 2-like OS=Juglans regia OX=51240 GN=LOC108992581 PE=4 SV=1	2	2	3	1	896	95.9	5.77	9.06	131.1	127.8	134.2	154.8	164.4	148.4	52.1	55	57.6	58.9	59.7	56
A0A2I4EPZ1	poly(U)-specific endoribonuclease-B-like isoform X1 OS=Juglans regia OX=51240 GN=LOC108991590 PE=3 SV=2	3	1	3	1	432	49.4	4.98	9.54	81	87.6	79.2	88.4	81.1	86.4	127.8	125.9	126	111.6	99.6	105.3
A0A6P9E3F7	probable protein phosphatase 2C 12 isoform X1 OS=Juglans regia OX=51240 GN=LOC108992365 PE=4 SV=1	5	2	4	2	436	47.6	5.34	11.91	125.2	125.7	123.1	135.9	130.6	126	76.5	80.6	76.3	66.4	61.8	71.9
A0A2I4H4G6	Adenylosuccinate lyase OS=Juglans regia OX=51240 GN=LOC109013419 PE=3 SV=1	7	4	4	4	547	61.4	7.71	10.23	105.5	108.4	105.1	98.3	104.4	108.8	98.1	96.3	93.2	95.3	94.6	92.1
A0A2I4EFL0	aspartyl protease AED3-like OS=Juglans regia OX=51240 GN=LOC108989124 PE=3 SV=1	4	1	9	1	438	47.1	9.19	34.52	57.1	62.9	63.6	72	65.3	66.2	142.2	129.5	125.2	155.8	125.1	135.1
A0A2I4DL60	heterogeneous nuclear ribonucleoprotein 1-like OS=Juglans regia OX=51240 GN=LOC108981229 PE=4 SV=1	3	1	3	1	467	47.4	6.81	11.26	91.2	93.7	100.2	106.9	107	113.6	107.5	105.2	106	95.1	86.4	87.4
A0A2I4HWV1	Glyceraldehyde-3-phosphate dehydrogenase OS=Juglans regia OX=51240 GN=LOC109022238 PE=3 SV=1	9	3	4	1	452	48.2	8.32	8.36	40.2	43.3	45.6	58.8	28.2	41.4	172.7	177.9	149.7	130	159.1	153
A0A2I4GC68	transportin-1-like OS=Juglans regia OX=51240 GN=LOC109006621 PE=4 SV=1	4	4	5	2	893	99.3	4.96	12.57	71.3	70.7	71.6	73.4	71.7	68.8	142.9	134.8	132.1	119	120.8	122.9
A0A2I4E3D1	serine/threonine-protein kinase OSR1 isoform X1 OS=Juglans regia OX=51240 GN=LOC108985864 PE=4 SV=2	7	3	3	2	699	77.3	6.33	7.18	109.9	121	128.6	136.5	131.5	133.1	63.6	75.7	76.2	79	69.1	75.7
A0A6P9E482	ultraviolet-B receptor UVR8-like isoform X7 OS=Juglans regia OX=51240 GN=LOC108983350 PE=4 SV=1	6	2	2	2	488	51.2	5.72	7.19	125.3	134.5	127	115.8	105	106.1	82.9	89.8	68.4	71.9	84.1	89
A0A2I4FU56	calmodulin-binding receptor-like cytoplasmic kinase 2 OS=Juglans regia OX=51240 GN=LOC109002055 PE=3 SV=1	7	3	4	3	443	49	8.66	9.31	35.5	39	35.8	39.6	33.4	36.3	214.5	205.9	207.8	118	116.9	117.4
A0A833U910	Peroxidase OS=Juglans regia OX=51240 GN=F2P56_026056 PE=3 SV=1	6	2	3	1	331	36.8	8.88	8.73	179.3	171.9	180.5	202.8	166	195.2	20.2	11.1	15	22.3	20.8	14.9
A0A2I4FQ34	protein argonaute 5 OS=Juglans regia OX=51240 GN=LOC109001082 PE=3 SV=1	4	3	3	2	995	111	9.54	8.84	65.9	93.2	81.5	71.6	62.3	76.3	120.2	116.7	124.2	124	130.7	133.5
A0A2I4HCX1	CCR4-NOT transcription complex subunit 1-like isoform X2 OS=Juglans regia OX=51240 GN=LOC109015989 PE=4 SV=2	2	4	5	1	2402	265.4	5.86	12.07	105.9	96	94.4	98.7	86.3	92.4	104.3	105.2	106.9	97	106.4	106.5
A0A2I4HPQ2	4-hydroxy-3-methylbut-2-enyl diphosphate reductase, chloroplastic-like OS=Juglans regia OX=51240 GN=LOC109020162 PE=3 SV=1	9	3	3	3	464	52.2	5.54	9.26	75.7	84.6	90.6	101.8	98.4	95.1	99.4	95.5	92.9	112.3	128.4	125.4
A0A2I4E492	Phospholipid-transporting ATPase OS=Juglans regia OX=51240 GN=LOC108986146 PE=3 SV=1	3	3	3	1	1195	135	5.73	7.48
A0A6P9EJQ6	cystathionine gamma-synthase 1, chloroplastic-like OS=Juglans regia OX=51240 GN=LOC109011873 PE=3 SV=1	3	1	2	1	548	58.5	7.15	8.54	92	82.4	85.3	87.9	92.9	99.5	101.7	95.8	103.5	118.1	119	121.9
A0A6P9EW20	peptidyl-prolyl cis-trans isomerase CYP40-like OS=Juglans regia OX=51240 GN=LOC108979794 PE=4 SV=1	13	4	6	2	363	40.6	6.33	15.95	137.7	123.9	124.1	132.5	111.8	120.4	66.1	69.8	69.6	78.4	80.6	85
A0A2I4G4P5	ABC transporter B family member 2-like OS=Juglans regia OX=51240 GN=LOC109004672 PE=4 SV=1	5	5	7	2	1249	137.3	8.92	13.7	87.5	89.4	103.8	83.7	84.1	85.4	132.1	130.1	124.6	94.2	91.8	93.3
A0A2I4DRG2	SEC1 family transport protein SLY1-like OS=Juglans regia OX=51240 GN=LOC108982732 PE=3 SV=1	7	4	5	4	613	68.3	6.4	7.03	106.6	109.8	118.1	115.5	108.6	103.3	102.8	89.8	94.2	90.4	78.3	82.6
A0A2I4ES05	Peptidyl-prolyl cis-trans isomerase OS=Juglans regia OX=51240 GN=LOC108992155 PE=3 SV=1	8	2	4	2	234	26.5	7.56	12.73	112.1	106.9	114.8	107.7	106.5	115.7	87.9	85.5	87.8	84.6	95.2	95.4
A0A833U9U0	Probable tRNA N6-adenosine threonylcarbamoyltransferase OS=Juglans regia OX=51240 GN=GCP2 PE=3 SV=1	10	3	4	3	386	42.3	7.01	12.45	58.5	64.3	62.7	60.8	67	58.9	136.5	141.3	134.2	140.9	133.5	141.4
A0A2I4GSV8	Calcium-transporting ATPase OS=Juglans regia OX=51240 GN=LOC109010572 PE=3 SV=1	4	4	5	2	1042	114.6	6.74	12.33	82.5	88.4	84.1	78.7	67.9	62.9	119.1	117	115.9	129.3	127.4	126.7
A0A2I4DJI8	Glutathione transferase OS=Juglans regia OX=51240 GN=LOC108980759 PE=4 SV=1	10	3	6	1	219	25.6	6.25	12.1	31	27.3	25.5	27.7	29	31.2	175.2	172.1	159.5	178.5	174.3	168.7
A0A2I4HP15	calcium-dependent protein kinase 1-like OS=Juglans regia OX=51240 GN=LOC109019928 PE=4 SV=1	6	3	3	1	571	63.5	5.57	10.34	136.4	143.6	146.8	122.2	123.6	118	64.9	70.5	67.8	61.8	76.8	67.5
A0A2I4EIU6	proactivator polypeptide-like 1 OS=Juglans regia OX=51240 GN=LOC108989981 PE=4 SV=1	6	1	2	1	249	27.7	4.92	7.44	83.9	85.6	88.1	107.5	104.7	109.1	87.9	86.7	107.2	110.8	114	114.5
A0A833XBQ5	Uncharacterized protein OS=Juglans regia OX=51240 GN=F2P56_019422 PE=3 SV=1	4	1	4	1	312	33	6.81	7.62	118.7	119.3	109.1	188.1	202.5	178.4	45.2	43.7	49.8	56.2	44.9	44.2
A0A2I4FHM0	Small nuclear ribonucleoprotein E OS=Juglans regia OX=51240 GN=LOC108998876 PE=3 SV=1	14	1	3	1	88	10.3	10.08	6.69	52.5	63	55.3	62.4	69.1	67.5	118	129.9	132.8	145.9	152	151.7
A0A2I4GGU2	paladin-like OS=Juglans regia OX=51240 GN=LOC109007755 PE=4 SV=2	2	3	4	2	1323	148.7	6.68	7.89	105.3	112.6	113.7	129.8	116.9	117.8	86.4	76.6	79.3	87.7	84.2	89.8
A0A2I4EP21	protein disulfide-isomerase 5-2-like OS=Juglans regia OX=51240 GN=LOC108991373 PE=4 SV=1	6	3	5	3	435	49.1	5.03	11.39	119.6	112.6	114.3	131.6	125.1	129.2	71	73.7	75.3	77.5	86.9	83.3
A0A2I4FVC9	armadillo repeat-containing protein 6 OS=Juglans regia OX=51240 GN=LOC109002357 PE=4 SV=2	10	5	6	5	473	50.4	5.21	14.52	90.5	96.5	100.6	112.7	108.3	102.2	102.9	107.3	103.5	87.1	90.8	97.7
A0A2I4H548	DNA-directed RNA polymerases II, IV and V subunit 3-like OS=Juglans regia OX=51240 GN=LOC109013568 PE=3 SV=1	8	2	2	2	317	35.5	4.89	7.5	66	64.1	61.8	62.3	71	66	137	129	125.7	139.3	138.8	138.9
A0A6P9E5W0	uncharacterized protein At1g03900-like OS=Juglans regia OX=51240 GN=LOC118345044 PE=4 SV=1	15	5	7	5	247	28.7	5.58	18.28	42.4	38.8	42.6	44.6	44.3	47.4	169.7	169.4	156.6	148.2	144.7	151.3
A0A2I4G7V5	phosphoglycolate phosphatase 1A, chloroplastic-like OS=Juglans regia OX=51240 GN=LOC109005470 PE=4 SV=1	8	3	5	3	386	42.6	8.69	10.7	98.5	95.1	102.1	97.4	97.6	93.4	107.4	103.9	96.7	97.8	103.2	107
A0A2I4GWN7	Splicing factor U2af large subunit OS=Juglans regia OX=51240 GN=LOC109011520 PE=3 SV=1	7	2	2	2	442	47.7	5.64	7.53	95.7	111.5	101.9	106.5	103.6	97.5	90.9	79.4	95.6	98.4	112.7	106.4
A0A6P9ETE9	Eukaryotic translation initiation factor 3 subunit M OS=Juglans regia OX=51240 GN=LOC109001728 PE=3 SV=1	7	2	4	2	410	46.2	5.22	10.21	63.2	62.1	62	70.1	61.5	71.5	136.3	126.9	131	126.7	144.8	144.1
A0A834D7K8	Uncharacterized protein OS=Juglans regia OX=51240 GN=F2P56_000490 PE=4 SV=1	4	3	3	3	929	102.6	4.89	8.17	113.3	107.8	125.5	119.7	114.1	103.8	85.8	88.3	88.7	82.9	87.9	82.1
A0A2I4EQU9	Peptidyl-prolyl cis-trans isomerase OS=Juglans regia OX=51240 GN=LOC108991837 PE=3 SV=1	10	2	4	1	236	25.8	7.59	13.52	136.3	142.6	131.4	140.2	138.3	147.7	62.5	67.2	71	48.3	60.8	53.7
A0A2I4E7Y9	spermidine synthase 1-like OS=Juglans regia OX=51240 GN=LOC108987113 PE=3 SV=1	6	2	4	1	343	37.7	5.2	12.4	105.5	116.2	114.6	106.7	91	104.7	84.8	87.2	101.3	98.9	92.3	97
A0A6P9EWX2	histone deacetylase complex subunit SAP18-like OS=Juglans regia OX=51240 GN=LOC108980242 PE=3 SV=1	17	3	5	3	154	17.3	9.54	14.89	70.8	67.6	71.8	83	85.4	87.9	114	114.7	120.2	127	132.3	125.2
A0A833TMJ9	Transmembrane 9 superfamily member (Fragment) OS=Juglans regia OX=51240 GN=F2P56_036576 PE=3 SV=1	3	2	5	1	634	72.1	9	14.31	88.7	89.5	89.1	87.7	84	98.4	114.4	124.7	115.1	98.7	105.6	104.1
A0A2I4GR02	Asparagine--tRNA ligase OS=Juglans regia OX=51240 GN=LOC109010069 PE=3 SV=1	6	4	6	3	572	63.9	6.27	17.4	80.4	83.5	78.2	82.5	83.9	81.8	124.3	123.6	120.6	117.8	109.8	113.5
A0A2I4G5T4	1-phosphatidylinositol-3-phosphate 5-kinase OS=Juglans regia OX=51240 GN=LOC109004985 PE=4 SV=2	2	3	4	3	1800	200.5	5.83	7.71	105.8	116.9	121.5	91.1	95.6	94.1	104.2	99.5	97.1	93.9	91.9	88.4
A0A2I4GCP0	DEAD-box ATP-dependent RNA helicase 21 OS=Juglans regia OX=51240 GN=LOC109006707 PE=3 SV=1	5	3	4	3	716	82.7	8.88	10.35	80.9	84.9	80.4	96.4	87.2	97.9	106.7	119	110.4	112.8	109.3	114.1
A0A6P9F6L0	patellin-3-like isoform X1 OS=Juglans regia OX=51240 GN=LOC108987669 PE=3 SV=1	4	2	3	1	589	66.2	4.89	10.74	71.3	72.4	77.9	74.8	74.2	74.2	125.7	123.1	137.8	120.7	121.3	126.6
A0A2I4HSS3	uncharacterized membrane protein At1g16860-like isoform X1 OS=Juglans regia OX=51240 GN=LOC109021086 PE=4 SV=1	5	2	3	1	486	52.1	9.5	6.66	51.8	57.7	57.4	52.5	59.3	55.9	163.9	158.6	149.9	129.4	130.3	133.5
A0A2I4DEM1	ESX-1 secretion system protein EccA1-like OS=Juglans regia OX=51240 GN=LOC108979371 PE=4 SV=1	6	2	4	2	479	53.8	6.99	6.55	135.1	136	143.5	159.6	145.3	143.7	58.9	50.5	59.9	57.5	53.7	56.2
A0A833Y807	Endo-1,3(4)-beta-glucanase OS=Juglans regia OX=51240 GN=F2P56_000129 PE=3 SV=1	4	3	3	3	783	87.7	8.12	9.6	117.1	118.2	116	103.8	99.3	104.3	85.1	83.2	86.5	99	92.5	95.2
A0A2I4HU91	uncharacterized protein LOC109021532 OS=Juglans regia OX=51240 GN=LOC109021532 PE=4 SV=2	7	2	4	2	268	30.4	5.48	10.31	30.1	30.1	29.9	34.9	36.6	33.2	163.8	169.6	169.5	171.5	166.1	164.6
A0A2I4E2Z4	protein TIC 22, chloroplastic OS=Juglans regia OX=51240 GN=LOC108985790 PE=4 SV=1	14	3	3	3	280	31.2	9.32	9.1	77.9	76.3	76.1	94.3	88.4	82.4	118.4	118.3	104.4	115.6	123.2	124.8
A0A6P9E8W1	protein ABCI7, chloroplastic OS=Juglans regia OX=51240 GN=LOC108994085 PE=4 SV=1	7	3	5	3	484	53.2	6.76	7.25	80.4	103.1	95.9	104.1	83.7	91.5	105.1	111.4	101.5	107.6	109.3	106.4
A0A2I4DGS7	Carboxypeptidase OS=Juglans regia OX=51240 GN=LOC108979996 PE=3 SV=2	4	1	2	1	456	51.7	7.46	7.94	125.8	130.2	120.7	145.8	131.8	131.5	65.6	63.3	68.5	63.4	81.2	72.1
A0A2I4GUK3	Katanin p60 ATPase-containing subunit A1 OS=Juglans regia OX=51240 GN=LOC109011013 PE=3 SV=1	9	3	3	3	520	56.9	7.39	8.84	79.4	82.9	66.5	67.1	74.3	78.3	125.3	125.3	135.7	119.6	118.9	126.5
A0A2I4GTT3	protein SAR DEFICIENT 4 OS=Juglans regia OX=51240 GN=LOC109010835 PE=4 SV=1	6	1	2	1	349	37.6	6.38	5.65	81.9	98.3	92.9	91.3	119.5	89.4	113	110.9	98	106.1	101.7	97
A0A2I4FF91	bifunctional purine biosynthesis protein PurH-like OS=Juglans regia OX=51240 GN=LOC118343665 PE=3 SV=1	7	4	5	4	612	66.4	6.86	9.93	98.5	105.5	105.9	104.2	99.2	107.2	93.9	90.4	89.7	107.4	100.5	97.5
A0A2I4HUH4	Selenoprotein O OS=Juglans regia OX=51240 GN=LOC109021570 PE=3 SV=1	5	3	5	3	650	71.9	6.02	13.52	112.3	111.5	116.3	124.2	129.1	130.3	80	81	78.2	78.3	81.9	76.7
A0A2I4DNF4	Ubiquitin-fold modifier-conjugating enzyme 1 OS=Juglans regia OX=51240 GN=LOC108981889 PE=3 SV=1	18	3	5	3	174	19.7	7.81	15.06	139.2	146	141.4	145	141.4	146.1	52.5	55.7	54	63.6	57.8	57.2
A0A833WK66	Uncharacterized protein OS=Juglans regia OX=51240 GN=F2P56_028386 PE=3 SV=1	9	2	3	2	225	24.4	9.63	6.97	97.3	95.8	91.5	97.4	100.8	104	90.1	90.7	100.9	109.1	114.7	107.6
A0A2I4F7T6	Mitochondrial pyruvate carrier OS=Juglans regia OX=51240 GN=LOC108996327 PE=3 SV=1	18	2	4	2	109	12.2	9.11	8.54	97.8	102.2	98.4	105.1	113	103.6	96.3	99	95.5	96.4	100.9	91.8
A0A833WU67	Uncharacterized protein OS=Juglans regia OX=51240 GN=F2P56_034454 PE=3 SV=1	3	3	5	2	1038	115.3	7.64	9.24	135.4	143.8	148.4	154.5	153.7	150.4	45.9	50.2	57.2	56.7	51.6	52.3
A0A2I4GUK9	Phospholipase D OS=Juglans regia OX=51240 GN=LOC109011028 PE=3 SV=1	3	3	4	2	1088	121	6.79	9.67	74.9	55.7	63.5	65.9	57.4	63.1	131	113	114.5	145.5	162.9	152.6
A0A2I4FRE2	SCY1-like protein 2 OS=Juglans regia OX=51240 GN=LOC109001398 PE=4 SV=1	3	3	6	3	928	100.7	7.64	9.44	108.4	103	105.8	115.1	112.9	108.5	88.5	92.2	97.4	90.5	87	90.7
A0A2I4EZZ0	40S ribosomal protein S24 OS=Juglans regia OX=51240 GN=LOC108994271 PE=3 SV=2	18	2	4	2	137	15.8	10.64	13.47	158.1	153	162.1	111.1	106.3	105.4	52.3	54.5	54.9	76.3	81.5	84.5
A0A2I4EWY0	L-ascorbate oxidase homolog OS=Juglans regia OX=51240 GN=LOC108993432 PE=3 SV=1	6	3	4	1	545	61.1	9.26	11.44	35.1	37.2	34	40.4	35.8	39.4	221.5	202.3	196.7	117.2	114.5	125.9
A0A2I4GM26	20 kDa chaperonin, chloroplastic-like OS=Juglans regia OX=51240 GN=LOC109009060 PE=3 SV=1	5	1	2	1	257	27	8.87	8.39	113.4	109.9	103.8	157.8	166.9	151.6	62.1	62.3	67.2	71.5	63.9	69.5
A0A2I4F207	Kinesin-like protein OS=Juglans regia OX=51240 GN=LOC108994786 PE=3 SV=1	4	3	3	3	817	90.6	6.29	9.81	100.3	91.5	108.8	102.4	102.9	97.2	98.4	100	103.7	98.9	101.7	94.4
A0A833WRR1	Exocyst complex component OS=Juglans regia OX=51240 GN=F2P56_018477 PE=3 SV=1	4	3	4	3	832	94.4	6.37	8.25	45.5	46.6	50.4	48.5	48.5	48.2	166.6	159.1	170.4	133	141.6	141.6
A0A6P9EWS9	methionine adenosyltransferase 2 subunit beta OS=Juglans regia OX=51240 GN=LOC109021559 PE=4 SV=1	4	1	4	1	318	34.9	5.68	12.8	72	70.4	69.2	63.6	58.1	58.9	133.5	121	130	138.1	144.8	140.5
A0A834CXG5	ArsA_ATPase domain-containing protein (Fragment) OS=Juglans regia OX=51240 GN=F2P56_016953 PE=4 SV=1	8	3	4	3	412	44.4	8.05	9.87	102.2	102.5	106.7	107.1	100.3	103.5	101.1	100.6	99.7	92.3	90.3	93.6
A0A2I4H3T3	probable protein phosphatase 2C 39 OS=Juglans regia OX=51240 GN=LOC109013230 PE=4 SV=1	11	3	4	3	283	31.4	6.61	8.68	86.9	81.5	95.4	100.6	94.5	97.2	122.6	111.8	107.3	105.6	101	95.5
A0A2I4GA34	Protein disulfide-isomerase OS=Juglans regia OX=51240 GN=LOC109006066 PE=3 SV=1	15	4	4	2	439	47.9	6.15	9.85	81.3	85.9	73.8	85.4	96.5	79.3	110.4	123.6	113.9	116.4	114	119.4
A0A2I4F9A3	probable anion transporter 5 OS=Juglans regia OX=51240 GN=LOC108996666 PE=3 SV=1	6	2	2	2	442	48.1	9.61	7.7	108.7	97.7	100.6	116.9	113.2	111.8	89.8	100.8	90.6	86.8	92.3	90.8
A0A2I4E6D9	Phospholipid-transporting ATPase OS=Juglans regia OX=51240 GN=LOC108986694 PE=3 SV=1	3	3	3	1	1190	134.4	6.06	7.64	102.6	104.6	110.7	88.7	90.3	84.8	101.7	98.3	109	97.6	107.5	104.2
A0A6P9EAH8	Coatomer subunit zeta OS=Juglans regia OX=51240 GN=LOC109011718 PE=3 SV=1	6	2	5	2	179	19.9	4.73	15.21	106.6	111.3	108.9	130	114.5	118.6	92.9	82.9	76.6	88.5	84.4	84.9
A0A2I4GNG6	glutaredoxin-C4 OS=Juglans regia OX=51240 GN=LOC109009450 PE=3 SV=1	14	1	3	1	134	14.5	5.52	13.36	153.9	147.7	151.9	141.2	137.2	159.2	45.1	50.1	48.2	51.3	56.9	57.2
A0A2I4DZS8	heterogeneous nuclear ribonucleoprotein 1-like OS=Juglans regia OX=51240 GN=LOC108984984 PE=4 SV=1	3	1	2	1	474	50.2	8.16	7.46	148.1	152	147.7	150.4	143.5	145.6	52.8	57.8	63.9	44.7	48.9	44.7
A0A2I4HMF8	Glutathione reductase OS=Juglans regia OX=51240 GN=LOC109019460 PE=3 SV=1	7	5	10	1	498	53.7	5.97	23.78	136.7	142.2	137.5	98.2	109.2	108	81.1	81.5	79	85.8	70.2	70.6
A0A833YDR9	Uncharacterized protein OS=Juglans regia OX=51240 GN=F2P56_001730 PE=3 SV=1	4	2	6	2	505	54.9	7.03	15.1	31.3	31.7	35.3	33.6	32.1	34.5	95.6	103.4	91.8	244.6	234.9	231.3
A0A2I4EVK0	Eukaryotic translation initiation factor 5A OS=Juglans regia OX=51240 GN=LOC108993111 PE=3 SV=1	18	3	10	1	160	17.6	5.76	15.78	98.7	104.2	97.8	121.7	130.2	136.1	77.8	89.7	86.8	85.6	92.2	79.2
A0A2I4G6A9	stem-specific protein TSJT1-like OS=Juglans regia OX=51240 GN=LOC109005091 PE=4 SV=1	11	3	4	1	250	27	6.73	13.43	134.1	134.9	128.5	134.7	143.8	124.2	66.6	64.2	68.5	70	66.3	64.3
A0A2I4FH29	dicarboxylate transporter 1, chloroplastic OS=Juglans regia OX=51240 GN=LOC108998726 PE=3 SV=1	4	2	3	2	563	59.5	9.73	9.46	97.3	94.6	100.9	102.9	97.8	108	88.9	86.5	93.2	111.5	109.9	108.7
A0A2I4G1W2	microtubule-associated protein 70-1-like OS=Juglans regia OX=51240 GN=LOC109003989 PE=3 SV=1	4	2	3	2	632	70.3	7.59	8.88	52.4	50.9	48.8	45	53.6	48.8	165.6	164.8	160.1	141.5	142.8	125.7
A0A6P9F171	pentatricopeptide repeat-containing protein At4g35850, mitochondrial-like isoform X2 OS=Juglans regia OX=51240 GN=LOC109009652 PE=4 SV=1	6	2	3	2	379	42.1	7.06	10.73	110.4	107.9	104.2	134.4	130.9	128	77.5	75	80.6	86.1	83	82.2
A0A2I4GNB9	Methenyltetrahydrofolate cyclohydrolase OS=Juglans regia OX=51240 GN=LOC109009386 PE=3 SV=2	10	4	6	4	362	39.3	8.9	9.06	93.1	86.9	92.4	113	108.8	100	107.6	95.7	104.7	99.2	101.4	97.2
A0A2I4GQN3	aminoacyl tRNA synthase complex-interacting multifunctional protein 1 isoform X1 OS=Juglans regia OX=51240 GN=LOC109009963 PE=4 SV=1	5	2	3	2	391	43.2	6.89	8.41	86.8	86.9	93.5	87.6	92.1	98	111.6	112.6	98.8	114.6	111.3	106.3
A0A2I4F9B4	Phytoene dehydrogenase OS=Juglans regia OX=51240 GN=LOC108996675 PE=3 SV=2	4	2	3	2	582	65.1	7.24	9.99	55.7	60.3	64.3	67.3	68	67.2	132.3	126.6	131.9	141.8	144.9	139.7
A0A6P9EST6	2-alkenal reductase (NADP(+)-dependent)-like OS=Juglans regia OX=51240 GN=LOC109003565 PE=4 SV=1	4	1	2	1	324	35.8	6.87	6.75	32.4	27.1	30.2	35	35.9	29.3	172.8	172.5	169.2	161	160	174.5
A0A2I4GNX3	Proteasome subunit beta OS=Juglans regia OX=51240 GN=LOC109009542 PE=3 SV=1	11	2	3	2	236	25.5	5.58	9.82	74.7	87.1	85.2	76.8	78	73.6	122.2	121.2	107.8	146.4	118	109.2
A0A2I4E4D7	IST1 homolog isoform X1 OS=Juglans regia OX=51240 GN=LOC108986191 PE=3 SV=2	8	2	3	2	330	36.2	8.48	9.72	94.6	94.2	101.7	105.4	109.8	116.1	99.9	94.2	115.5	79.8	108	80.9
A0A2I4H6S2	succinate dehydrogenase subunit 6, mitochondrial OS=Juglans regia OX=51240 GN=LOC109013999 PE=4 SV=1	6	1	5	1	150	17.3	7.05	16.39	88.2	88.6	95	108.1	110.5	105.1	98.5	102.5	99.6	99.5	103	101.5
A0A2I4DUY9	AP complex subunit sigma OS=Juglans regia OX=51240 GN=LOC108983685 PE=3 SV=1	25	4	9	4	142	17	6.28	11.37	70.3	72.7	73.4	69.4	72.6	68.7	148.2	143.7	133.7	116.1	121.3	109.9
A0A2I4EZ45	GrpE protein homolog OS=Juglans regia OX=51240 GN=LOC108994051 PE=3 SV=1	3	1	5	1	344	37.8	6.64	15.44	121.4	121.8	120.7	147.7	152.9	144.4	61.7	59.4	67.4	68.9	64.2	69.6
A0A2I4DDG7	probable serine/threonine-protein kinase DDB_G0291350 OS=Juglans regia OX=51240 GN=LOC108979067 PE=4 SV=1	7	2	3	2	347	38.4	6.71	10.76	109.1	118.3	116.8	118.5	127.9	118.1	88.5	91.9	89.3	72.2	74	75.4
A0A2I4FR43	proline-rich receptor-like protein kinase PERK8 isoform X1 OS=Juglans regia OX=51240 GN=LOC109001332 PE=4 SV=1	5	3	3	2	712	74.7	6.64	9.41	110.1	106.7	105	102.2	91.8	94.7	111.7	103	107.5	81.8	86.6	98.9
A0A2I4H4N8	40S ribosomal protein S28 OS=Juglans regia OX=51240 GN=LOC109013475 PE=3 SV=1	29	2	5	2	65	7.5	11.17	14	101.4	102	99.6	114.5	103.4	107.7	86.5	90.7	91.7	98.8	100.7	103.1
A0A6P9EKD8	probable aspartyl aminopeptidase OS=Juglans regia OX=51240 GN=LOC109016152 PE=3 SV=1	5	3	4	1	490	53.8	6.65	12	108.4	113.1	100.4	101.7	105	107.8	92	90.2	96.6	100.2	92.5	92.2
A0A2I4FJD2	COP9 signalosome complex subunit 2 OS=Juglans regia OX=51240 GN=LOC108999331 PE=4 SV=2	7	4	7	4	488	56.9	7.68	18.04	86.5	82.9	84.7	95.3	88.2	91.3	109.7	112.4	111.1	113.4	111.7	112.8
A0A2I4FYT7	uncharacterized protein LOC109003223 OS=Juglans regia OX=51240 GN=LOC109003223 PE=3 SV=1	18	2	3	2	118	13	5.38	6.15	83.6	88.4	83.6	246.4	224.8	227.8	34.9	34.2	42.3	45.4	44.2	44.5
A0A6P9E1J0	serine decarboxylase-like OS=Juglans regia OX=51240 GN=LOC109011835 PE=3 SV=1	7	2	2	1	490	54.4	6.9	7.39	126.6	110.8	116.8	115.7	108.2	99.2	84.5	77.7	85.8	82.1	104	88.6
A0A833U1Y6	Bifunctional dihydrofolate reductase-thymidylate synthase OS=Juglans regia OX=51240 GN=F2P56_029345 PE=3 SV=1	5	2	4	2	469	52.5	7.49	12.49	92.2	86.3	84.9	90	86.1	86.4	110.3	100.8	117.4	109.4	119.8	116.4
A0A834CRL8	CYTH domain-containing protein OS=Juglans regia OX=51240 GN=F2P56_013018 PE=4 SV=1	8	4	4	3	638	71.7	8.1	9.97	74.8	76.7	83.3	77.1	76.2	80.7	142.1	126.3	123.6	103.8	115	120.4
A0A2I4DQY2	rho GDP-dissociation inhibitor 1-like isoform X2 OS=Juglans regia OX=51240 GN=LOC108982595 PE=3 SV=1	13	3	4	3	240	27	4.78	9.82	162.8	164	161.7	208.7	209.7	224.3	7.7	6.6	14.7	12.9	13.9	12.9
A0A2I4FGD2	membrane steroid-binding protein 1 OS=Juglans regia OX=51240 GN=LOC108998597 PE=4 SV=1	12	2	7	2	216	23.5	4.55	17.95	65.7	69.1	62	73.3	72.4	79.1	138.6	143.3	132.4	118.3	122.3	123.4
A0A6P9E313	exosome complex exonuclease RRP44 homolog A OS=Juglans regia OX=51240 GN=LOC108983674 PE=3 SV=1	3	2	3	2	934	105.3	6.68	9.95	84	89.6	85	76.6	83.6	86.4	105.5	110	102.4	129	124.6	123.2
A0A2I4GDC1	Chlorophyll a-b binding protein, chloroplastic OS=Juglans regia OX=51240 GN=LOC109006913 PE=3 SV=2	18	3	5	1	295	31.7	8.1	15.41	20.5	11.2	15.3	23	30.6	32.4	176.1	172.1	175.1	185.9	165.4	192.3
A0A2I4GF30	Rhamnogalacturonan endolyase OS=Juglans regia OX=51240 GN=LOC109004812 PE=3 SV=1	4	2	3	1	640	73.3	5.8	10.14	84.3	86.6	102.2	100.4	114.3	105.3	82.4	93.5	104.2	94.6	107	125.2
A0A2I4GG01	acyl-CoA-binding domain-containing protein 1-like isoform X1 OS=Juglans regia OX=51240 GN=LOC109007565 PE=3 SV=1	5	2	4	2	342	37.1	4.56	8.39	123.5	125.6	117.5	127.7	137	134.5	67.2	72.9	78.1	68.5	69.8	77.5
A0A833WXA9	Uncharacterized protein OS=Juglans regia OX=51240 GN=F2P56_030072 PE=3 SV=1	15	2	7	2	141	16.1	11.62	19.75	184.4	191.2	177.4	122.9	123	123.8	40.9	37.5	39.8	53.1	53.4	52.7
A0A2I4FGT0	uncharacterized protein LOC108998659 OS=Juglans regia OX=51240 GN=LOC108998659 PE=4 SV=1	11	3	4	3	245	26.5	8.79	12.08	112.6	124.3	120.8	147.9	145.3	145.1	78.4	65.4	71.6	65.9	65.1	57.6
A0A2I4G443	Inositol-1-monophosphatase OS=Juglans regia OX=51240 GN=LOC109004560 PE=3 SV=1	4	2	4	2	270	29.1	5.36	12.67	110.3	111.1	115.5	109.1	98.2	102.8	89.5	88.8	91.8	91.6	96.3	95
A0A2I4FPR2	30S ribosomal protein S16-2, chloroplastic/mitochondrial OS=Juglans regia OX=51240 GN=LOC109001001 PE=3 SV=1	13	1	1	1	136	15.2	10.05	5.22	110.5	103	121.6	135.9	127.4	131.4	76.5	85	69	73.9	80.3	85.5
A0A2I4H190	Thymidine kinase OS=Juglans regia OX=51240 GN=LOC109012629 PE=3 SV=2	11	2	2	2	275	30.3	7.9	6.9	116.4	117.5	127.8	131.6	122.3	137.3	74	61.2	73.5	83.2	67.8	87.5
A0A2I4EDX9	U-box domain-containing protein 52-like isoform X1 OS=Juglans regia OX=51240 GN=LOC108988723 PE=4 SV=1	3	3	3	1	790	88.1	7.55	10.19	193.2	193.7	185.5	176.7	165.9	163.5	17	19.1	24.2	21.7	20.3	19.2
A0A2I4DYS3	uncharacterized protein LOC108984712 OS=Juglans regia OX=51240 GN=LOC108984712 PE=4 SV=1	6	3	4	3	405	45.2	8.46	10.55	162.9	162	161.7	180.5	175.6	175.9	24.3	27.8	33.8	31.6	32.4	31.4
A0A2I4H7G3	ABC-type xenobiotic transporter OS=Juglans regia OX=51240 GN=LOC109014180 PE=3 SV=2	3	4	4	4	1483	165.4	7.14	10.21	154.4	155.4	152.9	134.7	132.6	124.3	56	54	67.6	51.7	56.8	59.8
A0A6P9EA96	Calcium-transporting ATPase OS=Juglans regia OX=51240 GN=LOC109010491 PE=3 SV=1	3	3	5	1	1032	113	6.58	13.47	111.5	101.8	108.2	115.5	106.2	87.3	72.2	80.5	82.1	103.2	121.5	110.2
A0A833WT07	Pept_C1 domain-containing protein OS=Juglans regia OX=51240 GN=F2P56_036409 PE=3 SV=1	14	3	7	3	185	19.9	6.11	16.04	133.3	127.7	126.1	132.3	142	139.6	49.4	54.3	55	78.5	81.1	81
A0A6P9E640	Hexosyltransferase OS=Juglans regia OX=51240 GN=LOC109000371 PE=3 SV=1	4	2	3	2	546	60.7	8.28	9.77	102.8	99.3	92.7	83.8	90	91.1	96	105.5	110.4	106.5	112.7	109.4
A0A2I4DYA6	vacuolar sorting protein 18 isoform X1 OS=Juglans regia OX=51240 GN=LOC108984575 PE=3 SV=2	5	4	5	4	987	111.3	5.3	12	84.5	81.1	86	75.6	73.8	73.6	132	126.6	121.9	108.6	117.6	118.7
A0A2I4GT17	ubiquitin carboxyl-terminal hydrolase 4 OS=Juglans regia OX=51240 GN=LOC109010613 PE=3 SV=1	10	4	6	4	369	42	6.2	13.55	96.4	96.4	97.3	95.2	93	97	101.6	104.9	111.5	99.5	100.8	106.5
A0A2I4E8S3	mitochondrial import receptor subunit TOM40-1-like OS=Juglans regia OX=51240 GN=LOC108987347 PE=3 SV=1	5	1	2	1	312	34.8	7.55	6.11	77.2	85	83.3	85.1	84.3	92.3	102.2	113.2	116.4	130.9	115.7	114.2
A0A2I4H3F4	Probable bifunctional methylthioribulose-1-phosphate dehydratase/enolase-phosphatase E1 OS=Juglans regia OX=51240 GN=LOC109013151 PE=3 SV=1	10	5	6	5	493	53.8	6.21	16.22	61.4	61.5	67	73.4	76.6	73.9	132.3	144.9	134.1	126.1	127.6	121.3
A0A833WMK6	Uncharacterized protein OS=Juglans regia OX=51240 GN=F2P56_026145 PE=3 SV=1	13	2	5	2	139	16.6	9.45	16.16	111.3	116.1	105.4	126	137.5	130.3	78.2	79	80.3	76.5	80.4	78.9
A0A834D3R2	Fe-S_biosyn domain-containing protein (Fragment) OS=Juglans regia OX=51240 GN=F2P56_005811 PE=4 SV=1	8	1	2	1	159	17.3	5.35	6.94	139	131.1	129.9	176.6	176.3	172.7	38.4	41.7	51.8	46.7	44.1	51.8
A0A2I4GMH7	phosducin-like protein 3 OS=Juglans regia OX=51240 GN=LOC109009180 PE=3 SV=1	6	1	2	1	253	28.5	4.79	7.87	122.5	119.5	133.7	186.2	180	180.6	43.3	43.1	46.7	44.4	50.7	49.2
A0A833YC94	Uncharacterized protein OS=Juglans regia OX=51240 GN=F2P56_002343 PE=3 SV=1	3	2	4	2	391	43.1	6.33	11.56	28.6	34.9	34.6	33.3	33.8	31.8	171.4	192.3	182.8	151.9	147.6	156.9
A0A2I4F265	xyloglucan 6-xylosyltransferase 2-like OS=Juglans regia OX=51240 GN=LOC108994813 PE=3 SV=1	11	3	3	3	453	52.7	7.55	7.85	147.6	158.7	142.7	186.9	168.3	174.7	33.9	39.4	36.1	32.2	41.1	38.5
A0A2I4HS32	12-oxophytodienoate reductase 3 OS=Juglans regia OX=51240 GN=LOC109020871 PE=3 SV=1	7	2	3	2	397	43.7	7.85	7.9	42.3	40.8	40.6	43.9	42.8	43	164.4	169.6	162.1	145.3	154.5	150.7
A0A833WZ76	Photosystem I reaction center subunit II, chloroplastic OS=Juglans regia OX=51240 GN=F2P56_027499 PE=3 SV=1	6	1	3	1	246	26.9	9.7	6.58	75.5	55.7	57.3	75	62.6	60.6	134.8	141.8	131.9	127.7	144.7	132.3
A0A2I4F6B1	uncharacterized protein At1g03900-like isoform X1 OS=Juglans regia OX=51240 GN=LOC108995955 PE=4 SV=1	9	2	4	2	288	31.1	6.3	12.51	79.6	91.2	74.3	126.5	127.3	115	96.6	102.4	87.5	107.9	97.5	94.1
A0A2I4HJT3	5'-nucleotidase SurE OS=Juglans regia OX=51240 GN=LOC109018719 PE=3 SV=2	5	1	2	1	304	33	6.13	8.36	112.2	126	117	123.2	120.7	127.4	71.8	79.5	71.8	85.2	79.2	86
A0A2I4E0E1	Cellulose synthase OS=Juglans regia OX=51240 GN=LOC108985137 PE=3 SV=2	3	4	5	2	1086	121.9	6.84	11.19	51.3	62.4	65	65.6	54.9	59.5	149.9	155.7	135.6	128.3	130.3	141.4
A0A2I4H5Q5	trafficking protein particle complex II-specific subunit 130 homolog OS=Juglans regia OX=51240 GN=LOC109013740 PE=4 SV=1	3	3	3	3	1258	141.1	6.34	9.63	85.4	88.5	92.5	82.5	85.8	79.6	121.4	121.5	121	103.2	110.6	108
A0A2I4GTT5	probable NADH dehydrogenase [ubiquinone] 1 alpha subcomplex subunit 5, mitochondrial OS=Juglans regia OX=51240 GN=LOC109010841 PE=3 SV=1	9	1	2	1	169	19.2	4.79	7.33	98	94.8	104.4	145.2	121.4	129.5	73.3	91.7	96.6	81.9	78.4	84.9
A0A2I4EN11	Thioredoxin-dependent peroxiredoxin OS=Juglans regia OX=51240 GN=LOC108991097 PE=4 SV=1	18	3	3	3	213	23.5	9.5	9.01	73.2	78.3	81	87.3	87.7	92.3	149.1	127.1	133.7	104.6	95.6	90.1
A0A2I4G0E6	beta-taxilin OS=Juglans regia OX=51240 GN=LOC109003611 PE=3 SV=2	5	2	3	2	443	50.4	5.22	8.88	127.6	124.1	127.2	144	131.3	137.8	62	70	68.7	69.3	72.1	65.9
A0A2I4G5U3	uncharacterized protein LOC109004988 OS=Juglans regia OX=51240 GN=LOC109004988 PE=3 SV=2	4	4	7	1	1189	129.8	8.27	17.45	49.7	48.1	49.9	45.9	55.2	42.6	220.3	194.5	177.2	120.9	95.4	100.3
A0A6P9EHT4	Serine/threonine-protein kinase TOR OS=Juglans regia OX=51240 GN=LOC109022214 PE=3 SV=1	2	6	6	3	2477	277.8	6.6	12.25	91.5	83.9	90.4	89.4	87.4	84.5	111.2	117.7	114.1	108.4	113.8	107.7
A0A2I4GXE4	Phospholipid-transporting ATPase OS=Juglans regia OX=51240 GN=LOC109011719 PE=3 SV=1	3	3	3	2	1216	137.3	6.98	5.57	108.1	111.1	123.2	107.4	102.9	89.6	78.2	96.8	97.7	83.1	98.4	103.5
A0A6P9EZ46	stress-related protein-like OS=Juglans regia OX=51240 GN=LOC109006851 PE=3 SV=1	7	1	2	1	242	26.6	7.33	9.04	182.4	179.5	178	205.4	206.5	198.2	3	7.8	10.2	10.2	8.6	10.2
A0A2I4GLG9	50S ribosomal protein L15-like OS=Juglans regia OX=51240 GN=LOC109008911 PE=3 SV=1	13	3	3	3	275	30.2	11.44	9.56	164.8	160.6	155	171.2	166.2	165.5	32.8	28.4	34.2	39.1	41.4	41
A0A833TV69	Glyco_hydro_3 domain-containing protein OS=Juglans regia OX=51240 GN=F2P56_024949 PE=4 SV=1	8	2	3	2	233	25.2	8.59	9.09	48.5	53.9	56.2	51.3	59.3	60.8	129.6	121.3	119	178.6	160.4	161.2
A0A2I4E5R8	Ubiquinone biosynthesis protein OS=Juglans regia OX=51240 GN=LOC108986544 PE=3 SV=1	11	2	2	2	301	33.4	8.56	8.97	137.5	141.8	143.7	157	153.4	167.3	48	41.9	48.5	53.9	52	55
A0A833X1I6	Electron transfer flavoprotein subunit beta OS=Juglans regia OX=51240 GN=F2P56_027665 PE=3 SV=1	11	3	5	3	281	30.3	6.38	14.97	111.7	120.2	113.3	114.5	111.6	112.5	84.7	82.8	86.8	90	81.4	90.5
A0A2I4FR56	Tryptophan synthase OS=Juglans regia OX=51240 GN=LOC109001340 PE=3 SV=1	6	2	2	2	506	55.6	7.71	7.42	20.4	23.6	22.4	26.4	28	30.9	223.3	204.1	193.6	148.8	141.9	136.6
A0A2I4GEY6	probable glutamyl endopeptidase, chloroplastic isoform X4 OS=Juglans regia OX=51240 GN=LOC109007311 PE=4 SV=1	4	3	4	3	968	107.3	5.97	10.45	51.3	52.1	52.3	49.4	50.3	55.3	152.9	148.7	148.5	153.5	145	140.6
A0A2I4FMB4	MA3 DOMAIN-CONTAINING TRANSLATION REGULATORY FACTOR 2 OS=Juglans regia OX=51240 GN=LOC109000398 PE=3 SV=1	6	5	6	2	718	79.3	5.72	13.04	172	177.3	171.4	201.2	209	202.7	12	8.7	12.1	10.8	12.5	10.3
A0A2I4F3T8	probable aldo-keto reductase 1 OS=Juglans regia OX=51240 GN=LOC108995246 PE=4 SV=1	6	2	4	2	344	38.1	6.47	13.43	66	66.6	69.4	92.7	87.4	86.2	117.5	123.8	128.8	116.3	119.9	125.3
A0A6P9EP73	Glutathione transferase OS=Juglans regia OX=51240 GN=LOC108979257 PE=3 SV=1	9	3	6	1	220	25.6	5.97	11.14	14.4	15	13.1	15.8	16.3	16.3	184.4	194.7	180.8	184.2	182.2	182.8
A0A833WXX5	ATP phosphoribosyltransferase OS=Juglans regia OX=51240 GN=F2P56_029171 PE=4 SV=1	5	1	2	1	427	46.8	7.75	8.61	87.3	94	100.6	100.3	95.8	80.9	86.7	87.9	99.2	120.9	115.9	130.4
A0A2I4GDS0	Serine hydroxymethyltransferase OS=Juglans regia OX=51240 GN=LOC109007018 PE=3 SV=1	6	3	7	2	598	66.5	6.6	15	73.7	76	73.7	80.4	77.3	75.7	113.9	112	111.6	140	130.8	134.9
A0A2I4GFC0	Ferredoxin OS=Juglans regia OX=51240 GN=LOC109007382 PE=3 SV=1	17	1	2	1	155	16.6	5.3	6.53	50	64.8	62.1	46.1	55.2	62.1	99.2	114	117.7	169.6	176.9	182.2
A0A2I4DVV9	uncharacterized protein LOC108983944 OS=Juglans regia OX=51240 GN=LOC108983944 PE=4 SV=1	10	3	3	3	368	39.9	8.56	7.7	46	51.4	48.3	49.8	49.7	43.3	212.9	215.3	195	95.8	93.3	99.3
A0A2I4EFT4	ABC transporter B family member 25, mitochondrial-like isoform X2 OS=Juglans regia OX=51240 GN=LOC108989171 PE=4 SV=1	4	2	2	2	667	73.3	9.7	6.16	77.7	76.8	85.3	75.1	74.4	77.5	106.8	109.6	109.7	126.2	145.9	134.9
A0A2I4EIG0	ran-binding protein 1 homolog a-like OS=Juglans regia OX=51240 GN=LOC108989874 PE=4 SV=1	12	3	4	3	220	24.7	4.96	11.07	94.2	89	88.8	108.5	114.2	107.6	115.8	120.8	112.9	90.8	79.2	78
A0A2I4GXD1	Ribokinase OS=Juglans regia OX=51240 GN=LOC109011716 PE=3 SV=1	6	1	2	1	385	40.7	6.29	8.6	101.9	106.8	112.4	111.4	114.6	114.4	88.9	86.5	81.7	90.2	93.4	97.7
A0A833Y6M5	Small ubiquitin-related modifier OS=Juglans regia OX=51240 GN=F2P56_005481 PE=3 SV=1	34	4	5	2	99	11.3	7.72	12.96	57.6	61.9	53.9	58.8	54.5	53.9	152.3	144.3	125.2	143.7	151.9	141.9
A0A2I4F6B0	ABC-type xenobiotic transporter OS=Juglans regia OX=51240 GN=LOC108995962 PE=3 SV=1	2	3	5	2	1539	170	8.16	10.73	146.5	151.4	160.3	144	137.3	138	51	50.9	49.5	58.6	54.7	57.8
A0A2I4GSJ8	NEDD8-activating enzyme E1 catalytic subunit OS=Juglans regia OX=51240 GN=LOC109010475 PE=3 SV=1	7	3	3	3	449	49.2	5.76	10.33	74.1	75.8	75.2	87.9	88.2	91.9	127	115.3	114.8	119.3	113.5	117
A0A833U921	RNA helicase OS=Juglans regia OX=51240 GN=F2P56_028168 PE=3 SV=1	8	4	4	4	569	63.5	7.25	9.35	92.5	88.1	87.7	103	109.8	109.6	85	94.6	95.4	104.1	110.6	119.6
A0A833WVU3	Protein kinase domain-containing protein (Fragment) OS=Juglans regia OX=51240 GN=F2P56_033548 PE=3 SV=1	10	3	3	3	386	43.2	6.62	5.33	68.6	75.2	78.8	80.3	74.4	78.7	138.4	148.4	140.2	93.3	108.4	115.2
A0A2I4EV78	Argininosuccinate synthase OS=Juglans regia OX=51240 GN=LOC108992980 PE=3 SV=1	5	3	5	3	496	54.9	7.96	13.09	88.1	92.9	86.9	96.5	91	92.4	105.7	108.3	104.6	113.6	113.8	106.2
A0A833TLL0	Dolichyl-diphosphooligosaccharide--protein glycosyltransferase 48 kDa subunit (Fragment) OS=Juglans regia OX=51240 GN=F2P56_029276 PE=3 SV=1	5	2	4	2	426	47.6	7.28	9.6	99.4	99.2	97.7	100.3	102.4	98.7	98.1	93.7	106.1	100.4	102.8	101.2
A0A2I4GN86	mitochondrial outer membrane protein porin 2-like OS=Juglans regia OX=51240 GN=LOC109009361 PE=3 SV=2	8	4	10	3	276	29.2	9	24.02	72.8	74.1	74.8	76.6	81.7	80.8	123.3	120.2	117.9	119.6	132	126.3
A0A2I4EX91	LOW QUALITY PROTEIN: GTPase-activating protein GYP7-like OS=Juglans regia OX=51240 GN=LOC108993525 PE=4 SV=1	4	2	3	2	481	54.9	5.9	7.31	132.5	137.3	134.5	138.9	137.1	131.8	61.1	52.9	63.7	64.8	75.4	69.8
A0A6P9DZU7	proteasome adapter and scaffold protein ECM29 OS=Juglans regia OX=51240 GN=LOC109000602 PE=4 SV=1	1	3	3	3	1817	200.2	6.52	4.78	108.2	115	103.5	105.9	113.6	109.1	100.4	86.1	88.9	84.1	96.1	89.2
A0A833UBA7	Kinesin motor domain-containing protein OS=Juglans regia OX=51240 GN=F2P56_024081 PE=4 SV=1	3	3	4	3	1320	146.7	6.43	8.9	81.8	82	93.4	75.2	85.8	79.2	124.2	122	132.2	111.1	110.1	103.1
A0A833X017	Uncharacterized protein OS=Juglans regia OX=51240 GN=F2P56_028632 PE=4 SV=1	13	2	3	1	150	16.6	9.55	9.98	78.4	73.8	76	89.3	81.1	79	118.1	118.6	113.7	128.8	107.1	136.1
A0A2I4GVW0	calcium-dependent protein kinase 8-like OS=Juglans regia OX=51240 GN=LOC109011333 PE=4 SV=2	6	3	3	2	533	59.9	6.86	9.34	65.9	67.7	69.3	71.5	72.1	75.6	133.7	133	135.4	120.8	128.9	126.2
A0A2I4FA59	N-terminal acetyltransferase B complex auxiliary subunit NAA25 isoform X1 OS=Juglans regia OX=51240 GN=LOC108996936 PE=3 SV=1	4	4	5	4	1010	114.7	6.29	11.18	84.6	83.8	82	78.2	75.6	68.4	123.1	128.8	119.8	118.6	121.8	115.3
A0A2I4GQ02	serine/arginine-rich SC35-like splicing factor SCL30A OS=Juglans regia OX=51240 GN=LOC109009811 PE=4 SV=1	8	2	3	1	237	27.4	11.31	6.02	150.8	155.2	145.2	152.5	142.3	155.9	41.7	52.9	47	49.2	55.5	51.9
A0A2I4EF74	Small ubiquitin-related modifier OS=Juglans regia OX=51240 GN=LOC108989051 PE=3 SV=1	32	4	6	0	107	11.7	5.1	15.9	88.3	85.8	88.9	85.2	84.9	81.8	111.1	112.9	108.8	119	116	117.3
A0A2I4HB86	cytochrome P450 77A3-like OS=Juglans regia OX=51240 GN=LOC109015403 PE=3 SV=1	8	4	5	4	542	61.4	9.14	10.9	45.7	46.7	44.3	45.2	49	46.1	233.1	225.6	218.7	83.3	77.9	84.4
A0A2I4FBY4	ubiquitin domain-containing protein DSK2a-like OS=Juglans regia OX=51240 GN=LOC108997387 PE=4 SV=1	10	2	2	1	554	59.4	4.87	8.06	105.6	106.3	95.5	144.1	109.1	113.6	75.3	82.9	82.6	81.4	112.8	90.8
A0A2I4G1M3	argininosuccinate lyase, chloroplastic OS=Juglans regia OX=51240 GN=LOC109003912 PE=3 SV=2	6	3	3	3	519	57.3	5.88	8.82	94.9	95.2	89.2	114.7	118.6	112.3	78.8	86.4	86.3	104	107.1	112.4
A0A2I4HLN5	prosaposin-like OS=Juglans regia OX=51240 GN=LOC109019257 PE=4 SV=1	11	2	3	2	244	27.2	4.93	8.71	126.2	129.3	128.8	163.3	144.9	147.6	54.2	56.4	60.7	66.1	61.1	61.4
A0A2I4EFW2	Peptidyl-prolyl cis-trans isomerase OS=Juglans regia OX=51240 GN=LOC108989188 PE=3 SV=1	24	4	5	4	188	20.5	8.18	9.26	80.2	86.9	90.1	100.9	88.9	90	99.7	106	102.3	116.5	116.4	122.2
A0A2I4EAS4	Trafficking protein particle complex subunit OS=Juglans regia OX=51240 GN=LOC108987892 PE=3 SV=1	23	3	4	3	141	15.9	5.24	10.08	77.4	80.2	74	86.2	89.4	80.7	118.8	118.8	122.8	118.3	112.3	121.1
A0A2I4E5W3	Elongator complex protein 3 OS=Juglans regia OX=51240 GN=LOC108986586 PE=3 SV=1	7	3	3	3	563	63.2	8.35	7.36	76.3	70.2	85.8	85.7	77.7	77.5	115.3	108.3	108.1	126.5	135.4	133.4
A0A2I4F574	Purple acid phosphatase OS=Juglans regia OX=51240 GN=LOC108995652 PE=3 SV=1	7	3	4	2	482	55.7	7.21	8.75	119.5	120.1	120.3	114.3	114.9	114.9	82.3	81.5	78.2	85.1	79.7	89.2
A0A2I4EDD2	formamidase-like isoform X3 OS=Juglans regia OX=51240 GN=LOC108988557 PE=4 SV=2	6	2	2	2	452	49.6	5.74	6.97	51.2	49	63.1	76.7	68	69.4	135.4	142.3	127.5	136.5	148.1	132.8
A0A2I4DWN1	outer envelope pore protein 16-2, chloroplastic isoform X1 OS=Juglans regia OX=51240 GN=LOC108984154 PE=4 SV=2	7	1	4	1	184	19.3	6.95	14.64	142.3	136.6	135.3	196.3	199.8	192.1	20.1	20.5	30.5	41.4	38.7	46.4
A0A2I4H7T1	Phosphoribulokinase OS=Juglans regia OX=51240 GN=LOC109014262 PE=3 SV=1	13	5	5	1	411	45.6	6.62	11.66	43.6	48.7	49.5	47.9	47.5	45.9	162.1	155.1	155.9	143.1	147	153.8
A0A2I4E2T0	vesicle-associated membrane protein 727-like OS=Juglans regia OX=51240 GN=LOC108985734 PE=3 SV=1	10	3	4	2	239	27.6	6.42	9.83	100.6	100.8	101.4	130.4	134.5	129.4	78.4	76.4	78.3	86.4	89.7	93.6
A0A2I4FDG9	alpha-dioxygenase 2-like OS=Juglans regia OX=51240 GN=LOC108997763 PE=4 SV=1	3	2	3	1	645	73.8	6.62	9.2	102	92.9	101.3	58	83.3	70.1	142.3	124.9	129.5	103.1	99.9	92.9
A0A2I4GLM6	Peptidylprolyl isomerase OS=Juglans regia OX=51240 GN=LOC109008950 PE=4 SV=1	3	2	3	2	621	70.1	5.68	9.55	112.2	106.8	113.9	94.5	95.6	102.4	108.9	104.6	106.1	84.9	85.1	85
A0A833SQU9	Uncharacterized protein (Fragment) OS=Juglans regia OX=51240 GN=F2P56_031607 PE=4 SV=1	5	3	5	1	570	64.3	8.13	12.1	102.9	113.4	109.4	120.9	108.9	111.8	90.6	87.3	87.3	85	89.4	93
A0A6P9EQT8	CCR4-NOT transcription complex subunit 1-like OS=Juglans regia OX=51240 GN=LOC108990535 PE=4 SV=1	2	4	4	1	2550	282	5.58	9.2	111.4	142.8	96.7	113.2	103.6	95.7	93.1	122.4	68.4	81.4	91.9	79.3
A0A6P9EYJ0	two-on-two hemoglobin-3-like OS=Juglans regia OX=51240 GN=LOC108979617 PE=4 SV=1	14	2	2	2	169	19.7	8.21	6.91	69.1	72.3	81.4	93.3	87.4	91.5	107.8	114.8	116.5	125	119	121.9
A0A3G1VTD1	4-coumarate:CoA ligase OS=Juglans sigillata OX=224355 GN=4CL PE=2 SV=1	7	4	6	1	545	59.2	6.15	15.23	108.2	106.3	105.7	96.1	100.9	102.6	94.2	97.4	103.2	94.1	95.7	95.6
A0A2I4E6Q1	pre-mRNA-processing factor 17 isoform X2 OS=Juglans regia OX=51240 GN=LOC108986776 PE=4 SV=1	5	3	4	3	590	67.1	6.86	10.18	72.6	77	73.7	69.3	69.3	75.7	111.6	108.4	118.3	132.6	142.9	148.5
A0A2I4EPG7	Ribosomal RNA-processing protein 40 OS=Juglans regia OX=51240 GN=LOC108991484 PE=3 SV=1	7	1	2	1	243	26	8.12	6.13	72.7	74.9	84.7	91.8	74.1	92.7	106.4	120.5	105.9	128	119.7	128.7
A0A2I4FH50	uncharacterized protein LOC108998731 OS=Juglans regia OX=51240 GN=LOC108998731 PE=4 SV=1	18	3	4	3	79	9	9.44	12.67	114.4	112.6	105	124.5	120.4	127.3	78.4	83	80.5	84.1	86	83.7
A0A6P9ERS2	estradiol 17-beta-dehydrogenase 1-like isoform X2 OS=Juglans regia OX=51240 GN=LOC109020474 PE=4 SV=1	5	1	2	1	238	25.5	9.13	6.71	55.6	69.9	66.4	48.1	43	46.5	179	153.1	173.7	113.6	125.7	125.5
A0A2I4EXS3	probable cinnamyl alcohol dehydrogenase 1 OS=Juglans regia OX=51240 GN=LOC108993676 PE=3 SV=1	12	3	3	2	355	38.6	7.36	8.68	85.4	90.3	90.9	86.7	82.4	85	109.7	116	109.2	112	116.5	115.9
A0A2I4FRU8	60S ribosomal protein L6 OS=Juglans regia OX=51240 GN=LOC109001513 PE=3 SV=1	9	2	5	1	233	26.1	10.27	13.8	158.2	138	131.3	135.1	150	150.5	43.7	38.8	38.6	77.6	66	72.2
A0A6P9EAF7	Acetyl-CoA carboxytransferase OS=Juglans regia OX=51240 GN=LOC109009035 PE=3 SV=1	3	2	2	1	734	81.9	8.6	8.17	51.3	55.6	48.9	47.9	50.4	64.5	193.8	148.9	166.1	142.1	119.1	111.4
A0A6P9EI80	Pre-mRNA-processing factor 19 OS=Juglans regia OX=51240 GN=LOC109019525 PE=3 SV=1	3	1	2	1	524	56.8	6.54	6.63	77.4	94.4	78.9	89.3	109.5	109.6	101.3	113.4	106.7	106.3	114	99.1
A0A2I4ES38	ER membrane protein complex subunit 7 homolog OS=Juglans regia OX=51240 GN=LOC108992199 PE=4 SV=1	10	2	4	2	204	22.4	8.72	9.59	117.8	122.5	118	134.1	131.8	135	75.1	70.5	69.8	76.2	74.8	74.3
A0A833X4G6	Uncharacterized protein OS=Juglans regia OX=51240 GN=F2P56_022017 PE=4 SV=1	7	1	3	1	154	17.2	7.59	9.48	54.3	59.9	57.9	65.1	68.9	62	156.5	147.4	153.1	118.4	128.3	128.3
A0A2I4DGN9	Signal recognition particle subunit SRP72 OS=Juglans regia OX=51240 GN=LOC108979962 PE=3 SV=2	4	2	3	2	667	73	8.88	8.74	131.9	130	125.4	139.3	131.2	137.7	71.5	68.7	65.9	64.1	69.7	64.5
A0A2I4FCR4	Glucose-6-phosphate 1-epimerase OS=Juglans regia OX=51240 GN=LOC108997562 PE=3 SV=1	7	2	5	2	314	34.6	6.4	11.15	181	179.5	179.7	154.5	161.7	152.8	32.2	29.4	32.3	31.4	32.9	32.5
A0A2I4DJ04	Signal recognition particle 9 kDa protein OS=Juglans regia OX=51240 GN=LOC108980600 PE=3 SV=1	12	1	2	1	103	11.9	9.06	7.4	121.9	132.1	121.9	137.4	134.7	139.4	64.9	61	64.4	67.3	78.2	76.9
A0A2I4FXM9	NPC intracellular cholesterol transporter 1-like isoform X2 OS=Juglans regia OX=51240 GN=LOC109002943 PE=3 SV=1	2	3	5	2	1175	130.1	6.42	10.87	72.1	65.9	68.2	89.8	89.8	91	122.4	129.6	115.9	122.3	118.2	114.8
A0A2I4E7J8	NADH dehydrogenase [ubiquinone] 1 beta subcomplex subunit 9 OS=Juglans regia OX=51240 GN=LOC108986992 PE=3 SV=1	23	3	5	3	117	13.6	9	16.09	113	106.6	109.2	122.7	128.6	126.9	88.6	84.3	85.8	79.3	79.2	75.8
A0A2I4H6L4	nifU-like protein 4, mitochondrial isoform X1 OS=Juglans regia OX=51240 GN=LOC109013962 PE=3 SV=1	5	1	2	1	291	31.8	5.26	6.4	131.6	125.4	127	180.9	158.3	172.4	44.9	38.4	49	63.1	55.3	53.8
A0A833XB02	NAB domain-containing protein OS=Juglans regia OX=51240 GN=F2P56_019059 PE=4 SV=1	2	3	4	2	1075	122.5	5.03	10.34	174.7	172.4	177.4	156.7	142.7	149.1	31.8	32.2	40.4	42.6	40.3	39.8
A0A6P9EFC5	uncharacterized protein LOC118346017 OS=Juglans regia OX=51240 GN=LOC118346017 PE=4 SV=1	13	2	6	2	89	9.9	5.4	16.61	105.9	116.3	111.8	134.2	136.7	133.6	76.8	72.6	80.8	80.1	74.9	76.2
A0A2I4F1W7	GPN-loop GTPase QQT2-like OS=Juglans regia OX=51240 GN=LOC108994767 PE=3 SV=1	5	1	1	1	415	46.5	4.61	5.06	77.1	86.1	75.4	92.8	84.4	104.9	122.7	109.4	119.7	111.5	107.6	108.6
A0A2I4GLY0	serine/threonine-protein kinase tricorner-like isoform X1 OS=Juglans regia OX=51240 GN=LOC109009023 PE=4 SV=1	4	1	2	1	530	60.8	5.88	7.83	145.4	137.4	145.2	128.3	137.9	139.8	58	50.3	59.4	58.8	67.9	71.6
A0A2I4EY68	protein HLB1-like OS=Juglans regia OX=51240 GN=LOC108993777 PE=4 SV=1	7	3	6	3	520	57.4	4.84	12.78	101.1	104.5	106.7	110.7	105.6	113.2	99.7	102	101.7	83.5	83.4	88
A0A2I4FQP1	microtubule-associated protein RP/EB family member 1A-like OS=Juglans regia OX=51240 GN=LOC109001218 PE=3 SV=1	9	2	3	2	281	31.3	5.45	10.13	129.6	121.6	133.4	187.6	174.4	177.4	40.4	42.2	47.2	49.4	50.1	46.6
A0A2I4H3L6	uncharacterized protein LOC109013191 isoform X2 OS=Juglans regia OX=51240 GN=LOC109013191 PE=3 SV=1	5	1	2	1	296	31.8	8.62	6.89	100	101.2	100.7	90.5	90.1	98.6	106.7	92.3	99.9	108.5	106.2	105.3
A0A2I4GYZ4	uncharacterized protein LOC109012094 OS=Juglans regia OX=51240 GN=LOC109012094 PE=4 SV=2	4	4	5	4	1185	132.7	5.06	9.78	92.1	95.1	99.6	101.6	93.4	93.8	103.1	101.8	105.3	100.2	108.7	105.4
A0A833WWE3	Glycosyltransferase OS=Juglans regia OX=51240 GN=F2P56_029281 PE=3 SV=1	3	1	2	1	379	43.5	8.41	6.38	116.6	102.3	105.7	98.8	98.9	100.3	100.1	95	105.3	87.9	94.5	94.5
A0A2I4E8T1	60S ribosomal protein L21-1 OS=Juglans regia OX=51240 GN=LOC108987344 PE=3 SV=1	16	3	7	3	164	18.7	10.27	19.23	163.9	172.1	163.1	142.1	150.1	151.2	34.4	32.8	36.8	52.3	50.3	50.8
A0A2I4EBP6	2-hydroxyacyl-CoA lyase OS=Juglans regia OX=51240 GN=LOC108988141 PE=3 SV=1	2	1	4	1	573	61.2	6.96	11.49	78.6	86.4	77.3	75.7	74.2	79.8	111.7	108.1	114	127.5	137.1	129.5
A0A2I4GUD4	nudix hydrolase 3 isoform X1 OS=Juglans regia OX=51240 GN=LOC109010978 PE=4 SV=1	2	1	2	1	781	88.7	5.43	7.74	78.2	91.5	95.6	68.7	76.2	86.5	106.2	99.7	116.5	120.5	127.9	132.3
A0A2I4H843	selenoprotein F-like OS=Juglans regia OX=51240 GN=LOC109014341 PE=3 SV=1	14	2	3	2	159	18	4.91	8.87	91.8	97.8	102.8	115.9	122.7	115.3	102.1	98.6	97.8	88.5	81.1	85.7
A0A2I4FU75	Glutamine-dependent NAD(+) synthetase OS=Juglans regia OX=51240 GN=LOC109002069 PE=3 SV=2	6	3	4	3	732	81.6	6.24	11.69	108.6	100.7	115.1	109.3	105.4	95.7	89.8	90.7	81.5	102.8	103.5	96.9
A0A2I4FXZ5	uncharacterized protein LOC109003012 OS=Juglans regia OX=51240 GN=LOC109003012 PE=4 SV=1	3	2	3	2	682	76.4	5.1	6.43	76.9	82.9	81.6	101.7	93	103.2	126.6	129.7	127.9	89.5	96	91.1
A0A2I4GDC0	uncharacterized protein LOC109006898 OS=Juglans regia OX=51240 GN=LOC109006898 PE=4 SV=1	4	2	3	2	517	58.2	8.46	8.56	143.1	146.5	146.3	155.2	155.8	163.8	43.9	49.4	42.9	47.4	54.7	50.9
A0A2I4F4W9	uncharacterized membrane protein At1g75140-like OS=Juglans regia OX=51240 GN=LOC108995562 PE=4 SV=1	5	3	5	3	674	75.6	6.96	8.74	84	81.5	97.4	95.6	84.2	82.7	118.7	110.9	98	120.8	113.7	112.4
A0A2I4EWP7	PI-PLC X-box domain-containing protein DDB_G0293730-like OS=Juglans regia OX=51240 GN=LOC108993383 PE=4 SV=1	11	3	5	3	318	36.4	8.22	7.38	63.2	69.2	71.5	59.3	65.1	71.9	156	157.2	163.8	102.7	115.5	104.7
A0A2I4G8R5	ras-related protein RABC2a-like OS=Juglans regia OX=51240 GN=LOC109005698 PE=4 SV=1	15	3	5	2	218	23.9	5.52	13.26	55.7	59.4	67.7	62.9	62.1	66	160.3	172.1	160.3	103.9	108.7	120.8
A0A2I4GI66	Lipoxygenase OS=Juglans regia OX=51240 GN=LOC109008078 PE=3 SV=2	5	4	4	2	861	98.1	5.82	10.73	54.6	51.3	52.3	68.8	64.1	66.6	130.5	140.6	132.7	140	152.7	145.7
A0A833TII9	PPIase cyclophilin-type domain-containing protein OS=Juglans regia OX=51240 GN=F2P56_029208 PE=4 SV=1	7	4	6	2	417	47.1	8.47	14.31	111.3	115	116.8	100.9	100	102.5	91.6	85.6	90.5	94.9	95.3	95.5
A0A6P9F063	Signal recognition particle 14 kDa protein OS=Juglans regia OX=51240 GN=LOC108980837 PE=3 SV=1	8	1	2	1	119	13.4	10.04	8.07	128	136.2	130.3	122.6	126.9	132.1	71.1	62.3	63.6	76	75.4	75.4
A0A6P9EMC1	Glycerophosphodiester phosphodiesterase OS=Juglans regia OX=51240 GN=LOC108994221 PE=4 SV=1	6	2	3	2	404	46.6	6.47	10.88	68.3	74.4	72.5	79.5	79.7	72.2	122.6	113.1	126.1	128.4	131.3	132
A0A2I4DDH0	Laccase OS=Juglans regia OX=51240 GN=LOC108979069 PE=3 SV=1	6	3	4	3	582	64.3	8.85	6.61	48.8	64.8	68.4	62.3	57.8	58.2	172.5	152.2	152.1	121.8	122.5	118.6
A0A2I4GDC4	protein REDUCED WALL ACETYLATION 4-like OS=Juglans regia OX=51240 GN=LOC109006915 PE=3 SV=2	5	3	6	3	543	63.7	9	13.62	78.2	76	75.9	79.4	75.8	76.1	123	127	125	117.1	122	124.5
A0A2I4GE34	beta-xylosidase/alpha-L-arabinofuranosidase 2-like OS=Juglans regia OX=51240 GN=LOC109007085 PE=4 SV=2	3	2	3	1	790	85.3	8.22	10.13	48.7	57.5	55	49.2	53	53.5	156.2	158.8	137.7	152.9	145.6	131.8
A0A2I4H849	probable phosphoinositide phosphatase SAC9 OS=Juglans regia OX=51240 GN=LOC109014353 PE=4 SV=2	3	4	4	4	1638	180.9	6.46	8.1	107.4	106.8	103.6	89.4	94.8	95.7	108.1	102.4	95.6	95.2	101.6	99.4
A0A2I4GFA7	ER membrane protein complex subunit 1 OS=Juglans regia OX=51240 GN=LOC109007375 PE=3 SV=1	2	2	5	2	987	110.6	6.93	17.78	124	118.2	119.6	136.8	129.5	128	75.8	70.7	74.2	73.8	74.1	75.1
A0A833WXX9	Abhydrolase_3 domain-containing protein OS=Juglans regia OX=51240 GN=F2P56_029185 PE=4 SV=1	6	2	5	2	325	36.1	6.47	13.94	13.4	14.3	14.9	15.1	15.2	17.4	162.1	150.7	155.7	209.7	219.2	212.1
A0A2I4DPE5	L-ascorbate peroxidase OS=Juglans regia OX=51240 GN=LOC108982181 PE=3 SV=1	4	1	6	1	294	32.6	8.72	15.08	178.2	176.8	178.7	198.2	200.7	195.3	8.5	5.6	11.7	16	16.2	14.2
A0A6P9EAB3	proteasome subunit alpha type-2-A-like OS=Juglans regia OX=51240 GN=LOC109020972 PE=3 SV=1	13	2	3	1	136	15.2	6.52	8.63	62.5	62.2	64.4	64.9	71.8	71.6	129.8	132.9	129.3	136.5	136.6	137.6
A0A2I4H572	switch-associated protein 70 OS=Juglans regia OX=51240 GN=LOC109013618 PE=4 SV=1	7	3	3	3	495	54.8	6.21	8.89	94.5	93.4	98.8	114.9	105.6	106.5	94.5	108.7	102	97	87.5	96.9
A0A2I4E202	ER membrane protein complex subunit 8/9 homolog OS=Juglans regia OX=51240 GN=LOC108985544 PE=3 SV=1	12	3	5	3	203	22.9	6.15	14.63	115.6	121.9	126.6	120	118.6	127.5	80.4	78.8	84.8	82.7	74.1	68.8
A0A2I4EBJ5	AUGMIN subunit 5-like isoform X1 OS=Juglans regia OX=51240 GN=LOC108988101 PE=4 SV=2	4	4	4	4	799	89	6.57	9.93	66.6	66.8	69.7	66.9	62.7	71.1	140.5	132.3	135.6	121.4	133.9	132.5
A0A6P9DYL9	putative glutamine amidotransferase GAT1_2.1 OS=Juglans regia OX=51240 GN=LOC109002477 PE=4 SV=1	7	2	2	2	414	47.1	5.81	7.36	112.7	114.4	117.4	125.3	142.3	136.2	74.2	73.9	67.3	86.2	74.2	75.9
A0A6P9E397	serine/arginine-rich splicing factor SC35-like isoform X1 OS=Juglans regia OX=51240 GN=LOC109013378 PE=4 SV=1	8	2	3	2	253	29.3	11.02	7.9	105.6	100.1	99.5	111.6	101.7	100	95.2	82.8	86	104.3	103.6	109.7
A0A2I4FPB6	N-terminal acetyltransferase B complex catalytic subunit NAA20 OS=Juglans regia OX=51240 GN=LOC109000910 PE=4 SV=1	13	2	2	2	174	20.4	7.96	7.23	74.7	85.9	72.4	86.2	78.1	82.1	125.1	130.6	123.6	105.6	125.5	110.3
A0A2I4FXX8	Pectate lyase OS=Juglans regia OX=51240 GN=LOC109003018 PE=3 SV=1	13	3	3	3	263	30	8.81	9.87	107.1	107	114	103	111.2	99.1	91.7	92.4	92.8	96.9	90.7	94.1
A0A2I4EH46	Terpene cyclase/mutase family member OS=Juglans regia OX=51240 GN=LOC108989535 PE=3 SV=1	2	1	2	1	755	86.5	6.37	7.79	140.6	143.8	152.1	125.4	134.5	139.4	46.5	47.6	50	70.6	77.8	71.7
A0A2I4FYP7	probable methyltransferase At1g27930 OS=Juglans regia OX=51240 GN=LOC109003188 PE=4 SV=1	8	2	3	2	286	31.6	8.81	8.03	158.3	168.7	156.3	147.1	151.2	141.3	39.5	43.1	44.9	51.4	47.5	50.7
A0A833XZR8	Uncharacterized protein (Fragment) OS=Juglans regia OX=51240 GN=F2P56_006118 PE=4 SV=1	5	3	4	2	547	61.6	7.81	10.22	142.2	133	135.5	139.7	136.6	137.6	58.7	55	61.4	64.5	65.7	70.1
A0A2I4F307	anaphase-promoting complex subunit 7 isoform X1 OS=Juglans regia OX=51240 GN=LOC108995032 PE=4 SV=1	4	1	1	1	560	62.7	6.84	6.03	156.3	103.2	125	86.6	101.4	97.4	95.5	106.8	91.2	80.7	79.3	76.5
A0A833TY82	Uncharacterized protein OS=Juglans regia OX=51240 GN=F2P56_023774 PE=3 SV=1	9	2	3	2	233	25.2	8.79	9.63	164.8	154.6	165.4	155.6	154.1	144.9	37.3	39.8	44.3	44.9	46.7	47.6
A0A833U7F1	Uncharacterized protein OS=Juglans regia OX=51240 GN=F2P56_024851 PE=4 SV=1	10	3	5	3	279	31.4	10.3	14.11	97.7	97.7	100.9	101	100	97.1	95.6	93.7	93.3	104.3	112	106.8
A0A2I4E9C6	LIMR family protein At5g01460-like OS=Juglans regia OX=51240 GN=LOC108987523 PE=4 SV=1	4	2	3	2	508	56.5	8.88	6.98	49.5	51.5	50.5	49.5	54.6	41.7	170.4	172.3	165.6	129.8	130.6	134.1
A0A2I4FCC5	damage-control phosphatase At2g17340-like isoform X1 OS=Juglans regia OX=51240 GN=LOC108997453 PE=4 SV=1	8	2	4	2	367	40.9	5.34	12.25	104.4	103.3	100.8	98.1	104.6	103.5	85.2	97.6	93.6	103.7	97.4	107.6
A0A2I4GDP4	Transmembrane 9 superfamily member OS=Juglans regia OX=51240 GN=LOC109007009 PE=3 SV=2	3	2	3	1	589	66.9	8	8.45	110.8	107.4	98	94.2	94.6	80.7	101.4	89.1	90.7	131	91	111
A0A2I4H8J3	FT-interacting protein 7 OS=Juglans regia OX=51240 GN=LOC109014456 PE=3 SV=1	3	2	3	2	1008	114.4	8.91	8.06	70.7	82.2	76.2	68.7	67.3	73.6	139.9	130.3	131.1	115.4	121.3	123.3
A0A2I4DPU8	protein SUPPRESSOR OF GENE SILENCING 3 OS=Juglans regia OX=51240 GN=LOC108982293 PE=3 SV=1	5	3	3	3	653	75.6	5.87	9.23	130.1	129.2	119.8	122.3	124.2	118.3	83.9	83.4	79.2	67.6	67.4	74.6
A0A2I4FTR1	oligouridylate-binding protein 1B isoform X1 OS=Juglans regia OX=51240 GN=LOC109001962 PE=4 SV=1	9	4	5	4	423	46.1	7.78	13.58	100.8	94.2	100.1	102.5	101.3	100.1	104.7	102.5	97.6	101.7	95.1	99.5
A0A833YFL9	Ribosomal protein L15 OS=Juglans regia OX=51240 GN=F2P56_003087 PE=3 SV=1	4	1	2	1	309	35.1	9.1	7.27	115.3	109.9	107	109.9	118.2	101.8	85.4	99.1	82.6	90.2	92.9	87.7
A0A2I4EGR6	stem-specific protein TSJT1-like OS=Juglans regia OX=51240 GN=LOC108989433 PE=4 SV=1	10	3	6	1	251	27.1	6.86	15.49	141.1	124.9	129.1	125.1	126.3	128	71.9	70.5	76.2	73.9	62.5	70.4
A0A2I4FZZ3	guanine nucleotide exchange factor subunit RIC1-like isoform X3 OS=Juglans regia OX=51240 GN=LOC109003518 PE=4 SV=1	3	3	3	3	1123	126.8	6.58	8.24	79.9	94.7	94.2	93.8	97.8	87.6	106.7	109.3	106.2	112.6	111.3	105.8
A0A2I4F7P1	probable glucan 1,3-alpha-glucosidase isoform X1 OS=Juglans regia OX=51240 GN=LOC108996300 PE=3 SV=1	1	1	4	1	926	105.4	6.32	9.03	107.1	106.5	111.2	99.7	99.9	101.3	91.2	93.8	101.8	93.8	97.7	96
A0A2I4F0M7	CBS domain-containing protein CBSCBSPB5-like OS=Juglans regia OX=51240 GN=LOC108994435 PE=4 SV=1	4	2	3	2	537	58.1	6.54	6.59	160.2	152	144.9	152.5	152.6	156.1	40.3	44.6	46	45.4	55	50.3
A0A2I4EM28	tubulin-folding cofactor D OS=Juglans regia OX=51240 GN=LOC108990810 PE=4 SV=1	2	3	4	3	1271	140.8	6.07	9.87	108	95.7	111.2	99.9	94.1	98.8	101.2	99.6	105.3	96.9	94.7	94.6
A0A833UJI6	Peptidyl-prolyl cis-trans isomerase OS=Juglans regia OX=51240 GN=F2P56_028265 PE=3 SV=1	22	3	3	3	159	17.3	7.93	9.18	98.2	90.6	108.7	113.2	113.7	108.4	91.5	88.5	86.4	94.7	104.2	101.9
A0A2I4HBR2	Dihydrolipoamide acetyltransferase component of pyruvate dehydrogenase complex OS=Juglans regia OX=51240 GN=LOC109015577 PE=3 SV=1	3	2	5	2	643	69.5	6.95	12.12	137.4	130.4	138.5	137.8	142.1	139.4	63.1	62.5	67.9	58.3	61.6	60.8
A0A2I4FXD4	ABC transporter F family member 1 OS=Juglans regia OX=51240 GN=LOC109002842 PE=4 SV=1	7	3	3	3	600	67.2	6.62	8.87	109.8	114.3	120.5	102.4	98.5	94.9	103.5	98.3	97.1	89.2	88.7	82.8
A0A2I4GF41	splicing factor 3B subunit 6-like protein OS=Juglans regia OX=51240 GN=LOC109007337 PE=4 SV=1	25	2	2	2	123	14.3	9.55	6.28	64.1	57.1	59.1	69.4	69.2	62	132.8	127.6	144	139.9	137.3	137.4
A0A833XN05	Protein kinase domain-containing protein OS=Juglans regia OX=51240 GN=F2P56_012879 PE=3 SV=1	4	3	4	2	795	87.2	6.7	10.69	54.3	49	50.5	66.9	55.6	60.6	206.7	172.5	161.5	103.5	97.8	121.2
A0A833WVY9	Glyco_hyd_65N_2 domain-containing protein OS=Juglans regia OX=51240 GN=F2P56_028778 PE=4 SV=1	5	3	4	3	781	87.3	6.54	10.74	78.5	73.8	74.5	73.1	78.6	75.6	126.7	132.2	138.7	112.4	119.8	116.1
A0A2I4FN33	Phospholipid-transporting ATPase OS=Juglans regia OX=51240 GN=LOC109000577 PE=3 SV=1	4	3	3	1	1108	125.4	6.13	8.39	103.5	112.9	110	95.4	95.9	119	119.1	107.4	85.3	87.8	98.7	64.8
A0A2I4GY99	carbon catabolite repressor protein 4 homolog 1-like OS=Juglans regia OX=51240 GN=LOC109011922 PE=4 SV=1	6	3	3	3	600	66.6	6.87	8.39	97.8	94.9	94.6	107.2	97.5	103.1	97.7	94.2	108.7	98.4	97.9	108.1
A0A2I4FC74	uncharacterized protein LOC108997431 OS=Juglans regia OX=51240 GN=LOC108997431 PE=4 SV=1	10	2	5	1	204	23.2	7.24	12.87	104.6	103	98.4	105.8	117.4	105.8	114.6	110.2	101.9	81.5	80.3	76.6
[truncated: 2,148 more rows]

## Sheet: credible protein
Accession	Gene Name	Description	Coverage [%]	# Peptides	# PSMs	# Unique Peptides	# AAs	MW [kDa]	calc. pI	Score Sequest HT: Sequest HT	immature_pollen1	immature_pollen2	immature_pollen3	mature_pollen1	mature_pollen2	mature_pollen3	Unripe_fruit1	Unripe_fruit2	Unripe_fruit3	ripe_fruit1	ripe_fruit2	ripe_fruit3
A0A2I4GCT0	LOC109006783	heat shock cognate 70 kDa protein 2 OS=Juglans regia OX=51240 GN=LOC109006783 PE=3 SV=1	50	29	202	2	650	71.2	5.29	633.19	85.8	81.5	80.8	75.5	76	77.2	119.5	123.8	120.4	120.1	119.9	119.6
A0A2I4F270	LOC108994817	heat shock cognate protein 80-like OS=Juglans regia OX=51240 GN=LOC108994817 PE=3 SV=1	41	34	138	3	700	80.1	5.06	439.39	103.6	102.6	99.4	113.4	112.6	114.3	90.6	93.8	94.8	89.6	92.2	93.2
A0A2I4FVE3	LOC109002362	Clathrin heavy chain OS=Juglans regia OX=51240 GN=LOC109002362 PE=3 SV=1	31	47	121	14	1705	193	5.39	393.04	79.2	80.5	80.3	72.4	74.4	73.2	132.4	130.8	130.5	113.8	116.3	116.1
A0A6P9EU88	LOC108979161	Phosphopyruvate hydratase OS=Juglans regia OX=51240 GN=LOC108979161 PE=3 SV=1	53	22	171	9	445	48	6.47	553.73	82	80.9	80.2	78.7	78.7	79.2	111.3	113.6	113.8	127.4	126.4	127.9
A0A2I4E2C3	LOC108985631	heat shock cognate protein 80 OS=Juglans regia OX=51240 GN=LOC108985631 PE=3 SV=1	43	34	131	1	700	80.2	5.03	412.39	100.3	102.9	94.9	106.7	105.4	107.2	94.8	104.1	102.9	93.6	94.3	93
A0A2I4EMF1	LOC108990908	cell division cycle protein 48 homolog OS=Juglans regia OX=51240 GN=LOC108990908 PE=4 SV=1	49	37	100	9	806	89.5	5.22	342.09	105.4	106.4	104	99	101.8	103.1	95.7	95.4	95.9	99.3	97.2	96.8
A0A2I4E502	LOC108986352	heat shock cognate 70 kDa protein 2-like OS=Juglans regia OX=51240 GN=LOC108986352 PE=3 SV=1	49	28	174	3	650	71.2	5.19	552.1	67.5	71.3	70.6	70.1	65.2	63.5	133.6	129.6	133.5	132	129.2	133.9
A0A2I4FI60	LOC108999011	heat shock cognate 70 kDa protein 2-like OS=Juglans regia OX=51240 GN=LOC108999011 PE=3 SV=1	52	30	176	2	653	71.6	5.34	572.35	94.2	94.1	95.1	84.6	87.8	86	111.7	110.4	108.6	113.2	107.8	106.5
A0A6P9DUA2	LOC108981330	Clathrin heavy chain OS=Juglans regia OX=51240 GN=LOC108981330 PE=3 SV=1	30	45	119	12	1705	193.3	5.49	369.87	72.7	72.5	71.9	64.9	67	65	137.2	139.1	136.4	122	125.6	125.7
A0A2I4DSU6	LOC108983125	Tubulin alpha chain OS=Juglans regia OX=51240 GN=LOC108983125 PE=3 SV=1	63	21	135	1	450	49.5	5.06	397.29	56.9	58.5	57.3	56.9	56.4	56.3	159.2	158.5	153.1	128.3	127.5	131.2
A0A2I4E863	LOC108987170	elongation factor 2-like isoform X1 OS=Juglans regia OX=51240 GN=LOC108987170 PE=3 SV=1	37	30	127	3	843	93.8	6.29	386.55	109.7	106.3	106.5	97.4	95.4	98.2	93	96.5	96.4	98.5	98.7	103.5
A0A2I4E858	LOC108987171	elongation factor 2 OS=Juglans regia OX=51240 GN=LOC108987171 PE=3 SV=1	33	29	135	2	843	93.9	6.11	389.97	107.4	116.4	107	96.6	96.2	93.5	98.7	101.7	99.2	93.9	96	93.4
A0A6P9ET71	LOC109015564	actin-1 OS=Juglans regia OX=51240 GN=LOC109015564 PE=3 SV=1	60	18	258	2	377	41.6	5.49	813.08	164.2	160.8	158.5	156.3	153.6	153.3	50.4	43.6	53.7	34	37.5	34.1
A0A2I4GLH4	LOC109008915	actin-7 OS=Juglans regia OX=51240 GN=LOC109008915 PE=3 SV=1	60	18	242	4	377	41.7	5.49	751.91	106.7	107.5	104.3	101.6	102.8	103.1	105.1	105.8	105.9	85	85.2	87
A0A2I4EV32	LOC108992981	heat shock 70 kDa protein 4-like OS=Juglans regia OX=51240 GN=LOC108992981 PE=3 SV=1	48	27	156	3	649	71.1	5.29	509	100.2	101.4	99.7	95.3	95.5	96.2	101.3	95.3	98.2	109.5	103.4	103.9
A0A2I4G301	LOC109004247	V-type proton ATPase catalytic subunit A OS=Juglans regia OX=51240 GN=LOC109004247 PE=3 SV=1	45	22	106	22	623	68.6	5.58	362.62	88.5	89.3	86.8	87	85.2	86	119	116.9	115.6	107.3	108.7	109.6
A0A2I4E507	LOC108986355	actin-97 OS=Juglans regia OX=51240 GN=LOC108986355 PE=3 SV=1	58	17	214	1	377	41.7	5.49	703.23	162.9	159.6	158.8	139.1	137.6	142.5	55	54.7	57	44.1	44.3	44.4
A0A2I4H0S0	LOC109012510	ATP synthase subunit beta OS=Juglans regia OX=51240 GN=LOC109012510 PE=3 SV=2	44	17	111	16	559	59.8	6.06	397.31	109	111.7	107.6	121.7	120.9	121.1	84.5	83.4	85.8	84.8	84	85.6
A0A2I4E334	LOC108985820	Tubulin alpha chain OS=Juglans regia OX=51240 GN=LOC108985820 PE=3 SV=1	55	19	129	1	450	49.5	5.1	377.31	94	122.4	127.6	126.3	70.8	102.3	100.2	61.7	97.6	92.6	86.6	117.9
A0A2I4FU77	LOC109002071	endoplasmic reticulum chaperone BiP OS=Juglans regia OX=51240 GN=LOC109002071 PE=3 SV=1	45	29	143	26	666	73.4	5.25	464.02	112.9	114.4	113.8	118.1	119	119.7	80.5	81.9	82.3	88	84.1	85.2
A0A6P9EE16	LOC118344489	cell division cycle protein 48 homolog OS=Juglans regia OX=51240 GN=LOC118344489 PE=4 SV=1	40	32	84	4	805	89.4	5.31	278.56	114.1	116.2	114.9	113.2	108	113.5	81.7	85.5	85.8	85.1	92.1	90
A0A6P9E986	LOC108989630	Elongation factor 1-alpha OS=Juglans regia OX=51240 GN=LOC108989630 PE=3 SV=1	60	20	208	3	447	49.3	9.09	606.35	105	102.6	105.2	93.7	95.4	95.5	100.4	100	99.4	102	100.8	99.9
A0A2I4H6T0	LOC109014008	5-methyltetrahydropteroyltriglutamate--homocysteine S-methyltransferase OS=Juglans regia OX=51240 GN=LOC109014008 PE=3 SV=1	30	21	179	10	814	90.4	7.25	496.17	93.1	94	94.5	83	84	87.3	93.6	93.7	94.6	124.7	128.7	128.8
A0A2I4DU74	LOC108983505	UDP-glucuronate decarboxylase OS=Juglans regia OX=51240 GN=LOC108983505 PE=3 SV=1	53	16	115	1	346	38.9	7.55	372.17	49.8	49.4	48.3	49.5	50.4	50.1	146.2	146.6	143.2	155.7	154.3	156.5
A0A2I4GJI5	LOC109008436	Adenosylhomocysteinase OS=Juglans regia OX=51240 GN=LOC109008436 PE=3 SV=1	42	21	266	7	485	53	6.1	739.92	101.6	101.5	99.3	92.2	93	92.5	95.8	95.3	96	111.6	111.1	110.1
A0A2I4GZN8	LOC109012286	Phosphoenolpyruvate carboxylase OS=Juglans regia OX=51240 GN=LOC109012286 PE=3 SV=1	37	33	89	6	965	110.4	6.23	280.88	93.4	94.7	96.1	93.4	92.7	93.3	107.9	109.3	107.8	103.2	104.5	103.7
A0A2I4FGF9	LOC108998602	Tubulin beta chain OS=Juglans regia OX=51240 GN=LOC108998602 PE=3 SV=2	67	20	116	2	447	50.2	4.82	348.72	89.4	92.6	93.3	93.9	92.3	94.7	111.4	114.8	111.9	99.5	102.8	103.2
A0A2I4G6H5	LOC109005160	Phosphopyruvate hydratase OS=Juglans regia OX=51240 GN=LOC109005160 PE=3 SV=1	35	16	121	3	444	47.8	5.97	415.5	97.2	107.2	119.2	96.7	109.1	102.3	96.7	95.1	89	102.2	94.9	90.4
A0A6P9EPU5	LOC108990175	Plasma membrane ATPase OS=Juglans regia OX=51240 GN=LOC108990175 PE=3 SV=1	32	28	68	6	956	105.2	6.7	233.25	83.7	85.5	83.9	77.6	77.5	78.4	120.9	121.7	119.2	116.9	117.8	116.9
A0A2I4GE07	LOC109007071	actin-7-like OS=Juglans regia OX=51240 GN=LOC109007071 PE=3 SV=1	46	14	181	1	376	41.5	5.49	581.02	172.9	156.8	154.1	138.2	151.3	139.9	52.7	53.2	57.4	41.7	41.1	40.8
A0A833XZK6	F2P56_006199	Tubulin beta chain (Fragment) OS=Juglans regia OX=51240 GN=F2P56_006199 PE=3 SV=1	57	20	127	6	511	57.4	5	347.36	52.6	53	53.6	53.6	54.7	54.6	163.8	162.5	159.1	130.3	129.9	132.2
A0A2I4H8J6	LOC109014450	Tubulin beta chain OS=Juglans regia OX=51240 GN=LOC109014450 PE=3 SV=1	61	18	118	1	446	50.2	4.83	347.39	42.4	46.5	45	43.5	44.3	46.7	164.2	165.5	171.3	137.9	145.5	147
A0A2I4FQF7	LOC109001162	S-adenosylmethionine synthase OS=Juglans regia OX=51240 GN=LOC109001162 PE=3 SV=1	60	18	96	5	393	43	6.05	351.12	137.3	137.3	140.3	140.6	143	146.5	51.4	51.9	56.4	64	66	65.2
A0A2I4FIY0	LOC108999219	Plasma membrane ATPase OS=Juglans regia OX=51240 GN=LOC108999219 PE=3 SV=1	28	26	66	2	956	105.3	6.68	229.43	55.4	60.3	59.8	63.2	60.5	50.9	143.4	142.6	143.6	137.6	151.6	131.2
A0A2I4FXS2	LOC109002963	Tubulin beta chain OS=Juglans regia OX=51240 GN=LOC109002963 PE=3 SV=1	61	18	93	1	447	50.4	4.86	298.26	78.6	79.2	71.9	82.7	83.1	79.5	103.2	102.4	103.7	141.8	130	143.9
A0A2I4HMQ2	LOC109019574	Tubulin beta chain OS=Juglans regia OX=51240 GN=LOC109019574 PE=3 SV=1	55	17	110	1	444	49.9	4.93	323.93	103.5	107.6	105.6	101.3	97.3	97.1	116.9	116.6	116.7	80.5	77.9	79.1
A0A6P9E812	LOC108986960	Coatomer subunit alpha OS=Juglans regia OX=51240 GN=LOC108986960 PE=4 SV=1	33	32	75	6	1218	136.4	6.99	245.59	102	101.8	100.1	92.3	91.5	90.4	106.1	105.3	106.1	102.3	101.4	100.8
A0A833X597	F2P56_020539	Tubulin beta chain (Fragment) OS=Juglans regia OX=51240 GN=F2P56_020539 PE=3 SV=1	60	19	98	1	470	53	5.2	306.14	65.1	62.4	63.1	67	65	63.9	154.6	157.7	158.6	113.6	117.1	111.9
A0A2I4HDZ0	LOC109016418	Plasma membrane ATPase OS=Juglans regia OX=51240 GN=LOC109016418 PE=3 SV=1	28	26	71	6	954	105.1	6.92	235.97	83.3	81.9	78.9	85.2	85.2	85.1	104.7	112.7	109.9	124	123.8	125.3
A0A6P9ESY1	LOC109009115	eukaryotic initiation factor 4A-15-like OS=Juglans regia OX=51240 GN=LOC109009115 PE=4 SV=1	28	23	107	3	801	88.9	6	305.01	117.9	118.5	116.2	112.3	115.8	114.6	86.1	86.4	87.4	80.7	82.2	81.8
A0A2I4G145	LOC109003782	5-methyltetrahydropteroyltriglutamate--homocysteine S-methyltransferase OS=Juglans regia OX=51240 GN=LOC109003782 PE=3 SV=1	34	22	160	6	765	84.6	7.17	429.28	109.4	110.7	109.7	93.7	94.7	95.2	80.1	81.7	81.7	115.1	114.3	113.6
A0A2I4ET10	LOC108992417	Phosphoenolpyruvate carboxylase OS=Juglans regia OX=51240 GN=LOC108992417 PE=3 SV=1	33	31	78	3	965	110.2	6.13	244.61	100.7	97.2	98.1	91	90.9	93.1	107.1	111.8	108.9	101.1	98.4	101.6
A0A2I4E4Z9	LOC108986350	UDP-glucuronate decarboxylase OS=Juglans regia OX=51240 GN=LOC108986350 PE=3 SV=1	53	16	105	1	346	38.8	7.23	317.63	20.6	19.8	30.1	22	29	28.7	149.3	173.2	150.5	179.5	199.3	198.1
A0A2I4GLC6	LOC109008881	eukaryotic initiation factor 4A-2 OS=Juglans regia OX=51240 GN=LOC109008881 PE=3 SV=1	50	19	106	3	413	46.7	5.48	304.97	94.8	92.3	106.6	97.5	98.1	105.7	102.7	94.4	104.4	91.5	106.5	105.4
A0A2I4FL34	LOC108999916	S-adenosylmethionine synthase OS=Juglans regia OX=51240 GN=LOC108999916 PE=3 SV=1	55	17	94	4	393	43.3	6	305.73	110.9	107.4	108	121	125	125.5	70.2	70.5	72.1	95.5	96	97.8
A0A2I4DF35	LOC109018672	Elongation factor 1-alpha OS=Juglans regia OX=51240 GN=LOC109018672 PE=3 SV=1	55	19	192	2	447	49.3	9.03	538.87	115.9	119	120.2	102.2	102.6	105.2	90.9	89	90.1	86.5	89.9	88.4
A0A2I4GD24	LOC109006847	26S proteasome regulatory subunit 6A homolog OS=Juglans regia OX=51240 GN=LOC109006847 PE=3 SV=1	65	28	64	6	423	47.5	5.11	193.56	95	92.9	96.9	101.2	97.5	99.8	106.5	107.9	108.2	96.7	97.6	99.7
A0A2I4GC63	LOC109006618	Vacuolar proton pump subunit B OS=Juglans regia OX=51240 GN=LOC109006618 PE=3 SV=1	40	15	55	15	488	54.3	5.15	211.68	92.3	92.6	89.3	91.4	90.7	91	115.2	118.4	115.6	100.2	101.3	101.9
A0A2I4FSB7	LOC109001644	Tubulin alpha chain OS=Juglans regia OX=51240 GN=LOC109001644 PE=3 SV=1	52	18	86	2	449	49.6	5.1	242.98	56.4	58.3	59.5	58.4	58.8	54.2	164.8	169.4	161.3	120.5	115.8	122.5
A0A2I4G8U2	LOC109005730	Coatomer subunit alpha OS=Juglans regia OX=51240 GN=LOC109005730 PE=4 SV=1	28	30	73	4	1219	136.8	7.06	223.16	103.7	108.7	105.6	90.7	91.2	90.3	114.5	111.2	102.9	105.2	89.8	86.3
A0A2I4FTZ0	LOC109002014	eukaryotic initiation factor 4A-15 OS=Juglans regia OX=51240 GN=LOC109002014 PE=3 SV=1	45	19	91	2	413	46.7	5.69	247.1	131.9	121.7	132	121.8	125.2	125.8	72.2	67.4	71.2	76.1	78.8	76
A0A2I4EL14	LOC108990543	Tubulin alpha chain OS=Juglans regia OX=51240 GN=LOC108990543 PE=3 SV=1	49	17	96	1	449	49.6	5.14	273.3	88.4	95.9	111.9	115	109.5	101	89.7	101.5	66	119.7	104.4	97.1
A0A833XHN0	F2P56_016564	Coatomer subunit beta' OS=Juglans regia OX=51240 GN=F2P56_016564 PE=3 SV=1	26	21	68	3	907	102.5	5.14	202.76	93.2	92.9	93.3	81.2	83.1	84.4	115.9	114.6	113.6	108.5	109.3	110.1
A0A2I4FBX7	LOC108997380	Beta-adaptin-like protein OS=Juglans regia OX=51240 GN=LOC108997380 PE=3 SV=1	30	25	52	25	905	100.2	5.08	164.48	84.4	85.5	85.8	79.6	83.5	83.7	124.6	123.1	125.1	106.8	109.5	108.3
A0A2I4GY66	LOC109011912	trifunctional UDP-glucose 4,6-dehydratase/UDP-4-keto-6-deoxy-D-glucose 3,5-epimerase/UDP-4-keto-L-rhamnose-reductase RHM1 OS=Juglans regia OX=51240 GN=LOC109011912 PE=4 SV=1	34	16	71	4	671	75.5	6.98	221.06	145.2	143.3	143.6	138.8	134.9	137.9	60.7	58.3	64.7	56.1	57.3	59.4
A0A2I4FP75	LOC109000886	Tubulin beta chain OS=Juglans regia OX=51240 GN=LOC109000886 PE=3 SV=1	47	16	82	3	519	57.8	4.98	241.86	102.3	99.3	105.5	131.6	129.2	127.9	85.7	82.3	85.1	81.6	85.1	84.2
A0A2I4GR69	LOC109010118	Glyceraldehyde-3-phosphate dehydrogenase OS=Juglans regia OX=51240 GN=LOC109010118 PE=3 SV=2	53	14	126	5	337	36.7	7.18	392.57	109.5	109	107.3	100.3	104.2	104.1	90.3	92	90.3	99.6	97.7	95.7
A0A2I4HTW7	LOC109021415	26S proteasome regulatory subunit 7A OS=Juglans regia OX=51240 GN=LOC109021415 PE=3 SV=1	63	24	76	24	426	47.7	6.29	212.01	98.4	96.8	95.9	104.3	102.4	100.9	102.4	101.5	100.6	98.4	99.7	98.7
A0A6P9EIL2	LOC109019497	Plasma membrane ATPase OS=Juglans regia OX=51240 GN=LOC109019497 PE=3 SV=1	28	22	57	4	952	104.6	6.52	175.68	156.7	152.1	152	136.6	133.1	140.2	45.5	42.8	46.9	62.1	66.2	65.9
A0A2I4GA16	LOC109006061	26S proteasome regulatory subunit 4 homolog B-like OS=Juglans regia OX=51240 GN=LOC109006061 PE=3 SV=1	53	22	49	22	445	49.5	6.21	162.95	101	98.4	99.8	105.5	103.2	105.5	101	101.3	103.8	92	94.4	94.3
A0A2I4FMM5	LOC109000474	S-adenosylmethionine synthase OS=Juglans regia OX=51240 GN=LOC109000474 PE=3 SV=1	62	17	83	3	393	43.1	6.18	264.56	86.6	83.5	83.8	87.6	86	84.6	87.2	88.6	86.6	141.3	137.5	146.8
A0A2I4G0I3	LOC109003624	ruBisCO large subunit-binding protein subunit beta, chloroplastic OS=Juglans regia OX=51240 GN=LOC109003624 PE=3 SV=1	33	16	43	16	608	64.6	5.67	153.66	66.9	66.6	65.9	87	88.8	86.8	108.6	111.9	107.6	139.8	134.9	135.3
A0A6P9E2B8	LOC109008364	UDP-glucuronate decarboxylase OS=Juglans regia OX=51240 GN=LOC109008364 PE=3 SV=1	45	14	80	2	346	39.1	6.87	244.49	38.4	34.2	41.6	33.6	26.9	36.1	158.7	169	146.4	175.4	168.2	171.6
A0A2I4HPL3	LOC109020139	ATP citrate synthase OS=Juglans regia OX=51240 GN=LOC109020139 PE=4 SV=1	29	16	78	16	608	65.8	7.69	227.88	95.5	96	96.9	87.7	89.4	90	107.3	106.1	106.1	110	108	107
[truncated: 3,850 more rows]

## Sheet: mature_pollen_immature_pollen
Accession	Gene Name	Description	Coverage [%]	# Peptides	# PSMs	# Unique Peptides	# AAs	MW [kDa]	calc. pI	Score Sequest HT: Sequest HT	mature_pollen1	mature_pollen2	mature_pollen3	immature_pollen1	immature_pollen2	immature_pollen3	P-value	FDR	FC	1/FC
[truncated: 564 more rows]

[truncated: 1 more sheets: ripe_catkins_Unripe_catkins]
