# Supplementary material for: Multi-omics research on common allergens during the ripening of pollen and poplar flocs of Populus deltoides
Source: Front Plant Sci. 2023 Jun 16;14:1136613. doi: 10.3389/fpls.2023.1136613 (PMC10313134; doi:10.3389/fpls.2023.1136613)
Supplement: Supplementary file 2 [file Table_2.xlsx]

## Sheet: mature pollen_immature pollen
ID	m/z	Retention time (min)	Ion mode	Metabolites	Compound ID	Super Class	Class	Sub Class	kegg	Score	Fragmentation Score	Adducts	Formula	Mass Error (ppm)	VIP	P-value	log2(FC)	FC	average(mature pollen)	average(immature pollen)	mature-pollen1	mature-pollen2	mature-pollen3	mature-pollen4	immature-pollen1	immature-pollen2	immature-pollen3	immature-pollen4
9.01_314.0789n	313.072	9.00687	neg	Gnaphaliin	HMDB0030544	Phenylpropanoids and polyketides	Flavonoids	O-methylated flavonoids		55	78.6	M-H, 2M-H	C17H14O6	-0.378185	27.3639	2.30723e-07	5.71831	52.648	3.73305e+07	709058	4.05818e+07	3.51296e+07	3.86182e+07	3.49923e+07	1.36056e+06	1.43355e+06	20867	21249
8.77_256.0734n	255.066	8.77492	neg	Isoliquiritigenin	HMDB0037316	Phenylpropanoids and polyketides	Linear 1,3-diarylpropanoids	Chalcones and dihydrochalcones	C08650	42.8	16.9	M-H, 2M-H	C15H12O4	-0.515783	18.7432	2.5119e-06	6.42526	85.9404	1.74778e+07	203371	1.9322e+07	1.63379e+07	1.90132e+07	1.52381e+07	350257	363704	51257.2	48267.4
9.01_314.0787n	315.086	9.00695	pos	2',5-Dihydroxy-4',7-dimethoxyisoflavone	HMDB0037917	Phenylpropanoids and polyketides	Isoflavonoids	O-methylated isoflavonoids		39.7	2.58	M+H, M+Na	C17H14O6	-1.02818	17.6051	7.97675e-06	6.36743	82.5636	1.55011e+07	187747	1.76822e+07	1.40838e+07	1.69873e+07	1.32511e+07	390571	353794	3239.55	3384.73
1.14_268.1038m/z	268.104	1.13595	pos	Adenosine	HMDB0000050	Nucleosides, nucleotides, and analogues	Purine nucleosides	Unclassified	C00212	52.9	68.7	M+H	C10H13N5O4	-0.785949	16.2002	9.46907e-08	-1.04439	0.484849	1.20689e+07	2.48922e+07	1.1766e+07	1.24294e+07	1.23842e+07	1.1696e+07	2.50263e+07	2.43412e+07	2.59232e+07	2.4278e+07
6.26_286.0840n	285.077	6.25542	neg	3,4-Dihydroxy-9-methoxypterocarpan	HMDB0034012	Phenylpropanoids and polyketides	Isoflavonoids	Furanoisoflavonoids		47.1	39.7	M-H, 2M-H	C16H14O5	-0.568889	15.7816	4.23609e-07	5.43083	43.1361	1.24813e+07	289346	1.34002e+07	1.19967e+07	1.32676e+07	1.12605e+07	466196	478952	109008	103227
6.25_286.0838n	287.091	6.24677	pos	Dihydrowogonin	HMDB0037489	Phenylpropanoids and polyketides	Flavonoids	O-methylated flavonoids		51.4	60.6	M+H, M+K, M+Na, M+H-H2O	C16H14O5	-1.14223	15.2198	1.75575e-06	6.60887	97.604	1.14952e+07	117774	1.26837e+07	1.08797e+07	1.23684e+07	1.0049e+07	210027	197367	30321.7	33379
8.61_254.0577n	253.05	8.6129	neg	5,7-Dihydroxyflavone	HMDB0036619	Phenylpropanoids and polyketides	Flavonoids	Flavones	C10028	40.1	4.15	M-H, 2M-H	C15H10O4	-0.646013	14.5534	5.43704e-06	6.53717	92.8717	1.05594e+07	113699	1.16704e+07	9.56951e+06	1.18266e+07	9.171e+06	209866	212330	16336.4	16262.7
8.78_257.0806m/z	257.081	8.78468	pos	(S)-Pinocembrin	HMDB0030808	Phenylpropanoids and polyketides	Flavonoids	Flavans	C09827	56.4	84.9	M+H	C15H12O4	-0.816877	13.4597	2.98465e-06	6.72736	105.959	8.9992e+06	84930.9	9.69522e+06	7.94462e+06	1.01156e+07	8.24132e+06	155375	149599	17901.2	16849
8.61_255.0650m/z	255.065	8.60575	pos	Daidzein	HMDB0003312	Phenylpropanoids and polyketides	Isoflavonoids	Isoflav-2-enes	C10208	41.7	11.4	M+H	C15H10O4	-0.619955	13.3248	2.85784e-05	6.85829	116.025	8.91951e+06	76876.1	9.98856e+06	7.52106e+06	1.0527e+07	7.64141e+06	142547	145334	9715.48	9907.86
9.26_284.0683n	283.061	9.25683	neg	Glycitein	HMDB0005781	Phenylpropanoids and polyketides	Isoflavonoids	Isoflav-2-enes	C14536	56.6	86.4	M-H, 2M-H	C16H12O5	-0.561562	12.9966	1.9236e-07	6.54145	93.1475	8.34891e+06	89631	9.11347e+06	7.78935e+06	8.58147e+06	7.91134e+06	178676	161552	9078.11	9217.41
8.86_270.0527n	269.045	8.85998	neg	6-Hydroxydaidzein	HMDB0031715	Phenylpropanoids and polyketides	Isoflavonoids	Isoflav-2-enes	C14314	42.6	16.3	M-H, 2M-H	C15H10O5	-0.465228	12.481	5.97663e-07	6.94057	122.834	7.69383e+06	62635.8	8.15096e+06	7.02332e+06	8.42063e+06	7.18042e+06	113896	117204	9598.8	9844.42
0.79_307.0836n	308.091	0.78795	pos	Glutathione	HMDB0000125	Organic acids and derivatives	Carboxylic acids and derivatives	Amino acids, peptides, and analogues	C00051	53.6	73.4	M+H, M+K, M+Na	C10H17N3O6S	-0.724295	11.9845	8.04843e-08	1.43541	2.70458	1.11304e+07	4.1154e+06	1.10364e+07	1.07821e+07	1.17221e+07	1.09812e+07	3.94065e+06	4.15579e+06	4.38995e+06	3.97521e+06
9.25_284.0683n	285.076	9.25385	pos	Stevenin	HMDB0041776	Phenylpropanoids and polyketides	Neoflavonoids	Neoflavones		48.1	43.7	M+H, M+Na	C16H12O5	-0.548992	11.7789	4.48992e-07	6.78783	110.495	6.85488e+06	62038.1	7.24534e+06	6.33262e+06	7.47068e+06	6.37088e+06	120284	117966	4803.52	5098.56
0.79_192.0269n	191.02	0.790633	neg	Isocitric acid	HMDB0000193	Organic acids and derivatives	Carboxylic acids and derivatives	Tricarboxylic acids and derivatives	C00311	49.4	48.6	M-H, 2M-H	C6H8O7	-0.696176	11.1416	4.99738e-08	2.71288	6.55628	7.15102e+06	1.09071e+06	7.32398e+06	6.85694e+06	7.42279e+06	7.00037e+06	1.28086e+06	1.33197e+06	864067	885953
0.72_342.1161n	387.114	0.72095	neg	Allolactose	HMDB0038489	Organic oxygen compounds	Organooxygen compounds	Carbohydrates and carbohydrate conjugates		50.3	53	M+FA-H, 2M-H, M-H	C12H22O11	-0.275752	10.475	1.73407e-07	1.36213	2.57064	8.78007e+06	3.41552e+06	8.46476e+06	8.93796e+06	8.87121e+06	8.84637e+06	3.77741e+06	3.62361e+06	3.16689e+06	3.09418e+06
1.08_192.0269n	191.02	1.08298	neg	D-threo-Isocitric acid	HMDB0001874	Organic acids and derivatives	Carboxylic acids and derivatives	Tricarboxylic acids and derivatives	C00451	47.8	40.4	M-H2O-H, M-H	C6H8O7	-0.724949	8.9887	4.06255e-05	1.33354	2.52021	6.6924e+06	2.65549e+06	6.51226e+06	6.86572e+06	6.44826e+06	6.94338e+06	3.18966e+06	3.35247e+06	1.95791e+06	2.12194e+06
0.94_565.0474m/z	565.047	0.943883	neg	Uridine diphosphate glucose	HMDB0000286	Nucleosides, nucleotides, and analogues	Pyrimidine nucleotides	Pyrimidine nucleotide sugars	C00029	54.5	75.8	M-H	C15H24N2O17P2	-0.520298	8.78332	5.33537e-09	4.9527	30.9678	3.88723e+06	125525	3.76915e+06	3.95731e+06	3.75749e+06	4.06497e+06	166098	160664	90107	85230.8
7.61_328.0945n	329.102	7.61285	pos	Methyl 2-(2-methoxy-4-hydroxyphenyl)-6-methoxy-3-benzofurancarboxylate	HMDB0040935	Phenylpropanoids and polyketides	2-arylbenzofuran flavonoids	Unclassified		45.9	33.3	M+H, M+Na, M+K	C18H16O6	-0.621117	8.51317	1.88515e-06	7.75709	216.33	3.57742e+06	16536.9	3.93389e+06	3.1801e+06	3.8997e+06	3.29596e+06	33105	33042.5	0.00128576	0.00128576
7.30_330.0738n	329.067	7.30098	neg	Aflatoxin M2	HMDB0030480	Phenylpropanoids and polyketides	Coumarins and derivatives	Furanocoumarins		49.4	50.6	M-H, 2M-H	C17H14O7	-0.344878	8.49568	6.56433e-06	7.24079	151.25	3.58665e+06	23713.4	4.09656e+06	3.1931e+06	3.9121e+06	3.14483e+06	42608.4	47357.6	2287.96	2599.74
8.84_271.0599m/z	271.06	8.84343	pos	Norartocarpanone	HMDB0037314	Phenylpropanoids and polyketides	Flavonoids	Flavans		41.3	9.53	M+H-H2O	C15H12O6	-0.54089	8.12945	1.25921e-05	7.38958	167.681	3.29345e+06	19641.1	3.84258e+06	2.79953e+06	3.58935e+06	2.94235e+06	37021.2	37414.5	2005.16	2123.71
10.88_370.1413n	369.134	10.8812	neg	Lansiumarin B	HMDB0034836	Phenylpropanoids and polyketides	Coumarins and derivatives	Furanocoumarins		45.2	30.3	M-H, 2M-H	C21H22O6	-0.840942	8.08691	2.7064e-11	7.20637	147.684	3.20673e+06	21713.5	3.23542e+06	3.15429e+06	3.26019e+06	3.177e+06	43736.6	40427.3	1431.81	1258.15
0.73_116.0709m/z	116.071	0.7327	pos	L-Proline	HMDB0000162	Organic acids and derivatives	Carboxylic acids and derivatives	Amino acids, peptides, and analogues	C00148	51.1	63.6	M+H	C5H9NO2	2.2919	8.06968	0.00885339	-0.12842	0.914833	4.05126e+07	4.42842e+07	3.97705e+07	4.06902e+07	4.08559e+07	4.0734e+07	4.55955e+07	4.54234e+07	4.46377e+07	4.14803e+07
10.04_280.1097n	279.102	10.0436	neg	Phenprocoumon	HMDB0015081	Phenylpropanoids and polyketides	Coumarins and derivatives	Hydroxycoumarins		44	23.1	M-H, 2M-H	C18H16O3	-0.722393	7.98117	4.00038e-06	8.11574	277.384	3.14923e+06	11353.3	3.29711e+06	2.73e+06	3.62795e+06	2.94184e+06	22980.2	21404.9	658.201	369.945
6.96_270.0890n	271.096	6.95637	pos	Pinostrobin chalcone	HMDB0033702	Phenylpropanoids and polyketides	Linear 1,3-diarylpropanoids	Chalcones and dihydrochalcones		51.4	60.1	M+H, M+K, M+Na	C16H14O4	-0.780791	7.85022	2.33149e-07	6.54989	93.6944	3.04664e+06	32516.8	3.28506e+06	2.80971e+06	3.2057e+06	2.8861e+06	55862.8	54545.6	9957.03	9701.83
7.30_330.0737n	331.081	7.29603	pos	Aflatoxin B2a	HMDB0035598	Phenylpropanoids and polyketides	Coumarins and derivatives	Furanocoumarins		51.9	63.3	M+H, M+Na	C17H14O7	-0.721195	7.76597	2.40463e-05	7.28545	156.005	3.01914e+06	19352.9	3.43965e+06	2.58356e+06	3.4888e+06	2.56454e+06	37148.4	36445.4	1574.65	2243.03
9.71_328.0946n	327.087	9.71058	neg	Americanin D	HMDB0039601	Phenylpropanoids and polyketides	2-arylbenzofuran flavonoids	Unclassified		52.6	66.9	M-H, 2M-H	C18H16O6	-0.39477	7.53067	0.000338866	8.0942	273.273	2.92245e+06	10694.2	3.65926e+06	2.17312e+06	3.56443e+06	2.293e+06	20845	20509.5	657.914	764.639
0.75_365.1052m/z	365.105	0.751433	pos	Sakebiose	HMDB0029882	Organic oxygen compounds	Organooxygen compounds	Carbohydrates and carbohydrate conjugates	C01518	47.1	40.1	M+Na	C12H22O11	-0.567872	7.40592	1.27628e-07	1.34825	2.54602	4.41453e+06	1.73389e+06	4.4392e+06	4.37742e+06	4.36552e+06	4.47597e+06	1.87443e+06	1.90697e+06	1.56528e+06	1.58889e+06
0.70_195.0508m/z	195.051	0.703867	neg	D-Ribose	HMDB0000283	Organic oxygen compounds	Organooxygen compounds	Carbohydrates and carbohydrate conjugates	C00121	52.3	64.1	M+FA-H	C5H10O5	-1.60274	7.34406	2.48582e-07	-1.03707	0.487316	2.50825e+06	5.14707e+06	2.55437e+06	2.39953e+06	2.67002e+06	2.40909e+06	5.3142e+06	5.24508e+06	4.95344e+06	5.07558e+06
7.55_284.0683n	285.076	7.55332	pos	Cajaquinone	HMDB0039166	Benzenoids	Anthracenes	Anthraquinones		43.9	22.7	M+H, M+Na	C16H12O5	-0.589544	7.26494	1.08496e-05	7.39796	168.659	2.62762e+06	15579.5	2.95302e+06	2.27368e+06	2.97799e+06	2.30579e+06	29209.9	28694.3	2270.12	2143.76
7.20_272.0685n	271.061	7.19965	neg	Dihydrogenistein	HMDB0005897	Phenylpropanoids and polyketides	Isoflavonoids	Isoflavans	C14458	45	27.5	M-H, 2M-H, M+FA-H	C15H12O5	-0.0794795	7.10377	2.63525e-05	6.86749	116.767	2.53336e+06	21695.9	2.85621e+06	2.16547e+06	2.96432e+06	2.14745e+06	38593	37478.9	5524.31	5187.26
2.19_148.0525n	166.086	2.19483	pos	3,4-Dihydro-2H-1-benzopyran-2-one	HMDB0036626	Phenylpropanoids and polyketides	3,4-dihydrocoumarins	Unclassified	C02274	46.3	41.5	M+H-H2O, M+NH4, M+H	C9H8O2	0.747204	6.98036	2.27429e-06	-0.56496	0.675974	4.99917e+06	7.39551e+06	5.20644e+06	4.82063e+06	5.06734e+06	4.90229e+06	7.40556e+06	7.59876e+06	7.48039e+06	7.09733e+06
7.09_300.0632n	299.056	7.09432	neg	Barpisoflavone A	HMDB0032695	Phenylpropanoids and polyketides	Isoflavonoids	Isoflav-2-enes		48	43.5	M-H, 2M-H	C16H12O6	-0.526373	6.73866	2.69746e-05	7.02501	130.238	2.27819e+06	17492.5	2.69238e+06	1.94878e+06	2.54013e+06	1.93146e+06	33606.6	32481.6	1980.42	1901.4
7.63_328.0946n	327.087	7.632	neg	Frenolicin B	HMDB0034109	Phenylpropanoids and polyketides	Isochromanequinones	Benzoisochromanequinones		49.8	52.9	M-H, 2M-H	C18H16O6	-0.411253	6.57794	3.04613e-07	7.40739	169.765	2.1297e+06	12545	2.31107e+06	1.96948e+06	2.24216e+06	1.99609e+06	24301.4	25297.1	311.351	270.233
1.21_284.0988m/z	284.099	1.21402	pos	Guanosine	HMDB0000133	Nucleosides, nucleotides, and analogues	Purine nucleosides	Unclassified	C00387	50.9	58.1	M+H	C10H13N5O5	-0.359562	6.53212	4.08744e-06	-2.55665	0.16997	430493	2.53276e+06	391398	437782	458284	434507	2.31903e+06	2.2915e+06	2.79815e+06	2.72236e+06
4.55_756.2101n	757.217	4.55377	pos	Manghaslin	HMDB0037959	Phenylpropanoids and polyketides	Flavonoids	Flavonoid glycosides		53	67.6	M+H, M+Na, M+K	C33H40O20	-1.56795	6.42629	0.0301582	-0.105716	0.929343	3.49436e+07	3.76003e+07	3.63655e+07	3.37376e+07	3.39553e+07	3.57158e+07	3.92132e+07	3.72379e+07	3.79872e+07	3.59627e+07
1.02_402.9948m/z	402.995	1.02447	neg	Uridine 5'-diphosphate	HMDB0000295	Nucleosides, nucleotides, and analogues	Pyrimidine nucleotides	Pyrimidine ribonucleotides	C00015	50.6	56.4	M-H	C9H14N2O12P2	-0.331938	5.94006	2.61563e-06	4.11207	17.2925	1.84209e+06	106525	1.83136e+06	1.61561e+06	2.10414e+06	1.81723e+06	148700	123332	81104.1	72965.3
7.08_300.0632n	301.07	7.07522	pos	Chrysoeriol	HMDB0030667	Phenylpropanoids and polyketides	Flavonoids	O-methylated flavonoids	C04293	55.5	81	M+H, M+Na	C16H12O6	-0.551554	5.79958	5.02067e-05	7.1694	143.947	1.69509e+06	11775.8	2.02475e+06	1.41218e+06	1.92974e+06	1.4137e+06	21445.9	23769.7	770.126	1117.32
6.97_270.0892n	269.082	6.96888	neg	Imperatorin	HMDB0034376	Phenylpropanoids and polyketides	Coumarins and derivatives	Furanocoumarins	C09269	50.4	53	M-H, 2M-H	C16H14O4	-0.119433	5.68775	1.60285e-07	6.78312	110.134	1.59589e+06	14490.4	1.7293e+06	1.49833e+06	1.65543e+06	1.50051e+06	24319.7	23724.7	4901.77	5015.58
0.79_118.0863m/z	118.086	0.78795	pos	Betaine	HMDB0000043	Organic acids and derivatives	Carboxylic acids and derivatives	Amino acids, peptides, and analogues	C00719	43.1	21.6	M+H	C5H11NO2	0.48696	5.43346	0.000177231	-0.160717	0.89458	1.27275e+07	1.42273e+07	1.26689e+07	1.27183e+07	1.28144e+07	1.27084e+07	1.47592e+07	1.40031e+07	1.41423e+07	1.40048e+07
8.50_344.0894n	343.082	8.50308	neg	5,7-Dihydroxy-3',4',5'-trimethoxyflavone	HMDB0037692	Phenylpropanoids and polyketides	Flavonoids	O-methylated flavonoids	C19807	43.9	24	M-H, 2M-H	C18H16O7	-0.479331	5.39425	3.40834e-11	7.1761	144.618	1.42704e+06	9867.67	1.46199e+06	1.41417e+06	1.42247e+06	1.40954e+06	17549.1	16511.3	2832.36	2577.85
0.85_426.0223m/z	426.022	0.847283	neg	ADP	HMDB0001341	Nucleosides, nucleotides, and analogues	Purine nucleotides	Purine ribonucleotides	C00008	49	50.1	M-H	C10H15N5O10P2	0.390152	5.29607	1.6146e-06	2.49097	5.62155	1.67551e+06	298052	1.75599e+06	1.51171e+06	1.82656e+06	1.60779e+06	331983	340499	263797	255928
0.61_146.1056n	147.113	0.610317	pos	L-Lysine	HMDB0000182	Organic acids and derivatives	Carboxylic acids and derivatives	Amino acids, peptides, and analogues	C00047	51.8	64.9	M+H, M+Na, M+H-H2O	C6H14N2O2	0.196888	5.28444	2.92204e-07	-0.807688	0.571297	1.82132e+06	3.18804e+06	1.88992e+06	1.80041e+06	1.84804e+06	1.7469e+06	3.24199e+06	3.26969e+06	3.17803e+06	3.06245e+06
10.19_354.1100n	353.103	10.1905	neg	Glyceofuran	HMDB0034111	Phenylpropanoids and polyketides	Isoflavonoids	Furanoisoflavonoids		50.5	56.5	M-H, 2M-H	C20H18O6	-0.817712	5.19121	0.000228123	6.77053	109.177	1.38684e+06	12702.6	1.66249e+06	1.07272e+06	1.71668e+06	1.09547e+06	25494.8	24942.9	215.508	157.306
9.46_296.1046n	295.097	9.46107	neg	6-Hydroxy-R-phenprocoumon	HMDB0060886	Phenylpropanoids and polyketides	Coumarins and derivatives	Hydroxycoumarins		42.2	14.9	M-H, 2M-H	C18H16O4	-0.816692	5.16527	4.4729e-05	7.99842	255.721	1.33908e+06	5236.48	1.58172e+06	1.10521e+06	1.53634e+06	1.13304e+06	10695.5	9879.19	306.956	64.2824
8.49_344.0895n	345.097	8.48593	pos	santin	5281695	Lipids and lipid-like molecules	Polyketides	Flavonoids		56	84.2	M+H, M+Na	C18H16O7	-0.354321	4.9781	1.01902e-07	7.37594	166.104	1.21798e+06	7332.67	1.26457e+06	1.15231e+06	1.30966e+06	1.14539e+06	13732.1	12755.9	1307.84	1534.9
5.36_432.1054n	433.113	5.36197	pos	Cosmosiin	HMDB0037340	Phenylpropanoids and polyketides	Flavonoids	Flavonoid glycosides	C04608	54.2	75.3	M+H, M+Na, M+K	C21H20O10	-0.535289	4.87221	4.88351e-08	7.1653	143.539	1.16723e+06	8131.81	1.1296e+06	1.08845e+06	1.22738e+06	1.22349e+06	14028.9	13895.5	2018.99	2583.83
5.39_432.1053n	431.098	5.38528	neg	w-O-beta-D-Glucopyranosylaloeemodin	HMDB0034405	Benzenoids	Anthracenes	Anthraquinones		48	42.1	M-H, 2M-H	C21H20O10	-0.709281	4.85262	4.30005e-12	6.90155	119.557	1.15644e+06	9672.68	1.15756e+06	1.16775e+06	1.13859e+06	1.16185e+06	15712.5	16006	3527.91	3444.27
0.72_138.0549m/z	138.055	0.715617	pos	Trigonelline	HMDB0000875	Alkaloids and derivatives	Unclassified	Unclassified	C01004	45.9	37.5	M+H	C7H7NO2	-0.300234	4.7724	0.000114049	-0.434034	0.740189	3.27779e+06	4.42832e+06	3.3792e+06	3.06316e+06	3.30522e+06	3.36358e+06	4.53792e+06	4.66566e+06	4.32103e+06	4.18864e+06
9.34_356.1258n	357.133	9.33502	pos	Licofuranone	HMDB0035525	Phenylpropanoids and polyketides	2-arylbenzofuran flavonoids	Unclassified		43	19.4	M+H, M+Na, M+K	C20H20O6	-0.414485	4.75349	9.58633e-07	8.44432	348.331	1.11122e+06	3190.13	1.20067e+06	1.0406e+06	1.20887e+06	994733	5460.13	7300.37	0.00128576	0.00128576
0.63_164.0740m/z	164.074	0.628217	pos	L-2-Amino-5-(methylthio)pentanoic acid	HMDB0030406	Organic acids and derivatives	Carboxylic acids and derivatives	Amino acids, peptides, and analogues	C17213	51.3	67.9	M+H	C6H13NO2S	-0.141331	4.63982	0.00032524	-0.405677	0.754882	3.4057e+06	4.51156e+06	3.43718e+06	3.41902e+06	3.48813e+06	3.27847e+06	4.61172e+06	4.8715e+06	4.3152e+06	4.24784e+06
0.96_535.0370m/z	535.037	0.964683	neg	UDP-D-apiose	HMDB0012301	Nucleosides, nucleotides, and analogues	Pyrimidine nucleotides	Pyrimidine ribonucleotides	C01623	54.5	77.7	M-H	C14H22N2O16P2	-0.342739	4.50771	8.53731e-08	2.8194	7.05871	1.15646e+06	163834	1.14471e+06	1.15378e+06	1.14896e+06	1.17838e+06	222249	215440	113807	103841
0.69_132.0301m/z	132.03	0.68675	neg	L-Aspartic acid	HMDB0000191	Organic acids and derivatives	Carboxylic acids and derivatives	Amino acids, peptides, and analogues	C00049	49.6	54.8	M-H	C4H7NO4	-1.1943	4.32308	5.59396e-05	-0.78716	0.579484	1.29101e+06	2.22786e+06	1.364e+06	1.37782e+06	1.22631e+06	1.1959e+06	2.39914e+06	2.33158e+06	2.09477e+06	2.08594e+06
10.89_370.1414n	371.149	10.8912	pos	(+)-Fargesin	HMDB0038236	Lignans, neolignans and related compounds	Furanoid lignans	Unclassified		39.4	1.16	M+H, M+Na	C21H22O6	-0.665939	4.26465	1.75954e-07	8.05646	266.217	892678	3353.2	989844	846479	856304	878085	6530.18	6882.6	0.00128576	0.00128576
10.59_356.1259n	355.119	10.5888	neg	Kievitone	HMDB0034213	Phenylpropanoids and polyketides	Isoflavonoids	Isoflavans	C01590	48.2	44.3	M-H, 2M-H	C20H20O6	-0.131308	4.26224	0.000193323	7.50546	181.706	929115	5113.29	1.17928e+06	752416	1.06639e+06	718379	9437.05	11016.1	0.00128576	0.00128576
0.63_156.0768m/z	156.077	0.628217	pos	L-2-Amino-3-(1-pyrazolyl)propanoic acid	HMDB0034267	Organic acids and derivatives	Carboxylic acids and derivatives	Amino acids, peptides, and analogues		55	81.8	M+H	C6H9N3O2	0.305376	4.24557	9.90277e-05	-0.261937	0.833968	4.56679e+06	5.47598e+06	4.78544e+06	4.48495e+06	4.53891e+06	4.45787e+06	5.54905e+06	5.58683e+06	5.47931e+06	5.28875e+06
9.03_898.5220n	943.526	9.02803	neg	Chondrillasterol 3-[glucosyl-(1->2)-glucosyl-(1->2)-glucoside]	HMDB0033887	Lipids and lipid-like molecules	Steroids and steroid derivatives	Stigmastanes and derivatives		38.1	0	M-H, M+FA-H	C47H78O16	-7.77784	4.21239	5.47015e-06	-0.984492	0.505404	894071	1.76902e+06	861550	933509	793149	988076	1.78023e+06	1.65358e+06	1.81233e+06	1.82996e+06
0.70_475.1768m/z	475.177	0.698083	pos	6-Feruloylglucose 2,3,4-trihydroxy-3-methylbutylglycoside	HMDB0036214	Lipids and lipid-like molecules	Fatty Acyls	Fatty acyl glycosides		36.2	0	M+H	C21H30O12	-8.87773	4.15234	1.86349e-05	1.35948	2.56593	1.40286e+06	546726	1.30896e+06	1.58741e+06	1.33226e+06	1.38282e+06	568247	622241	489232	507186
6.98_372.1207n	373.128	6.97678	pos	Sesamolinol	HMDB0033270	Benzenoids	Phenols	Methoxyphenols		39.8	4.14	M+H, M+Na, M+K	C20H20O7	-0.644506	4.13705	1.72935e-09	8.06241	267.318	837218	3131.92	877543	827826	832544	810960	6371.45	6156.22	0.00128576	0.00128576
9.70_329.1018m/z	329.102	9.69877	pos	7-Hydroxy-3,4',8-trimethoxyflavone	HMDB0041544	Phenylpropanoids and polyketides	Flavonoids	O-methylated flavonoids		39.7	2.12	M+H	C18H16O6	-0.552192	4.05732	0.0013011	8.20196	294.467	875504	2973.18	1.13093e+06	680115	1.145e+06	545969	6482.81	5409.91	0.00128576	0.00128576
1.99_378.1329m/z	378.133	1.98558	pos	Romucosine C	HMDB0036764	Alkaloids and derivatives	Aporphines	Unclassified		40.7	17	M+Na	C20H21NO5	4.78249	4.02669	0.0102174	-4.0464	0.0605217	61084	1.00929e+06	58056.9	67010.9	52440	66828.3	1.4391e+06	1.46922e+06	579430	549413
1.08_289.0678m/z	289.068	1.08298	neg	Uridine	HMDB0000296	Nucleosides, nucleotides, and analogues	Pyrimidine nucleosides	Unclassified	C00299	55.3	76.5	M+FA-H	C9H12N2O6	0.0543197	3.89871	2.75574e-08	-1.48465	0.357335	412447	1.15423e+06	415552	426971	395446	411819	1.19773e+06	1.17504e+06	1.12466e+06	1.11948e+06
4.63_498.2594m/z	498.259	4.6318	pos	N1,N10-Diferuloylspermidine	HMDB0033471	Phenylpropanoids and polyketides	Cinnamic acids and derivatives	Hydroxycinnamic acids and derivatives		47.4	41.6	M+H	C27H35N3O6	-0.975253	3.89558	4.07335e-06	0.770276	1.7056	1.80703e+06	1.05947e+06	1.87578e+06	1.72361e+06	1.88767e+06	1.74103e+06	1.06373e+06	1.08766e+06	1.08179e+06	1.0047e+06
9.38_298.2740m/z	298.274	9.37642	pos	Dehydrophytosphingosine	HMDB0038057	Organic nitrogen compounds	Organonitrogen compounds	Amines		56.5	86.4	M+H-H2O	C18H37NO3	-0.303729	3.73917	0.000401481	-2.26234	0.208433	189685	910053	165690	186578	187240	219233	684520	793222	1.08483e+06	1.07765e+06
6.21_316.0580n	317.065	6.20555	pos	3,4',5,7-Tetrahydroxy-6-methoxyflavone	HMDB0030547	Phenylpropanoids and polyketides	Flavonoids	Flavones		55.5	81.6	M+H, M+Na	C16H12O7	-0.91506	3.71806	0.000203031	7.32182	159.988	707949	4425.01	812842	571963	900518	546473	8378	9322.05	0.00128576	0.00128576
1.10_341.0295m/z	341.029	1.10023	neg	Medicagol	HMDB0033831	Phenylpropanoids and polyketides	Isoflavonoids	Coumestans		37.8	0.143	M+FA-H	C16H8O6	-2.81008	3.68565	1.01829e-07	-1.83521	0.280251	258394	922010	249458	259664	235631	288824	881790	895636	950764	959851
0.70_147.0533n	148.06	0.698083	pos	L-Glutamic acid	HMDB0000148	Organic acids and derivatives	Carboxylic acids and derivatives	Amino acids, peptides, and analogues	C00025	46.4	35.3	M+H-H2O, M+H	C5H9NO4	0.667934	3.64185	3.38301e-06	1.24925	2.37718	1.12764e+06	474362	1.08033e+06	1.09778e+06	1.09393e+06	1.23854e+06	486584	502549	475717	432598
9.34_356.1260n	355.119	9.33938	neg	Cubebin	HMDB0030682	Lignans, neolignans and related compounds	Furanoid lignans	Tetrahydrofuran lignans		39.4	0	M-H, 2M-H	C20H20O6	-0.0524321	3.60028	3.37822e-07	7.97105	250.914	636943	2538.49	692107	572965	665198	617500	5150.06	4751.17	106.928	145.823
0.72_255.0974m/z	255.097	0.715617	pos	Methyl 2,3-dihydro-3,5-dihydroxy-2-oxo-3-indoleacetic acid	HMDB0038942	Organoheterocyclic compounds	Indoles and derivatives	Indolyl carboxylic acids and derivatives		40.4	4.51	M+NH4	C11H11NO5	-0.581785	3.58979	1.25491e-05	-3.07854	0.118377	85717.2	724102	81334.6	82221.2	82622.9	96690.1	627007	657180	831148	781073
12.13_377.1423m/z	377.142	12.1297	neg	Glycylglycylglycine	HMDB0029419	Organic acids and derivatives	Carboxylic acids and derivatives	Amino acids, peptides, and analogues		42	28.8	2M-H	C6H11N3O4	-0.979687	3.57609	0.00156297	-0.562974	0.676906	1.42998e+06	2.11252e+06	1.7013e+06	1.4417e+06	1.26304e+06	1.31387e+06	2.22448e+06	2.26573e+06	2.00008e+06	1.95979e+06
1.08_251.0695m/z	251.07	1.08162	pos	gamma-Glutamylcysteine	HMDB0001049	Organic acids and derivatives	Carboxylic acids and derivatives	Amino acids, peptides, and analogues	C00669	51.8	66.7	M+H	C8H14N2O5S	-0.284122	3.55255	8.15113e-06	1.2125	2.31739	1.09712e+06	473430	1.0536e+06	1.16984e+06	1.08428e+06	1.08077e+06	550361	521631	410319	411408
0.69_147.0531n	146.046	0.68675	neg	O-Acetylserine	HMDB0003011	Organic acids and derivatives	Carboxylic acids and derivatives	Amino acids, peptides, and analogues	C00979	45.3	33.3	M-H2O-H, M-H	C5H9NO4	-0.132699	3.5306	2.17479e-05	2.05325	4.1504	816145	196643	884882	873954	794568	711177	258111	249882	137512	141066
10.20_355.1174m/z	355.117	10.2023	pos	Cyclokievitone	HMDB0033983	Phenylpropanoids and polyketides	Isoflavonoids	Isoflavans	C10207	43.5	21.9	M+H	C20H18O6	-0.68134	3.52894	0.00148959	7.33036	160.937	667164	4145.49	859937	444167	889435	475119	7877.44	8704.52	0.00128576	0.00128576
8.77_323.0535m/z	323.054	8.77492	neg	Umbelliferone	HMDB0029865	Phenylpropanoids and polyketides	Coumarins and derivatives	Hydroxycoumarins	C09315	36.9	0	2M-H	C9H6O3	-8.04901	3.47891	4.80968e-07	6.5852	96.0158	598839	6236.88	648465	575482	634385	537025	10866.7	11549.3	1317.62	1213.89
6.99_372.1207n	371.113	6.99003	neg	Oxidihydroartocarpesin	HMDB0037508	Phenylpropanoids and polyketides	Flavonoids	Flavones		41	9.57	M-H, 2M-H	C20H20O7	-0.634555	3.39903	3.66268e-09	7.68365	205.593	565976	2752.9	579216	533934	579657	571096	5343.87	5513.47	83.4447	70.8007
0.77_517.1407m/z	517.141	0.772617	neg	Galabiose	HMDB0029902	Organic oxygen compounds	Organooxygen compounds	Carbohydrates and carbohydrate conjugates	C00760	46.9	39.8	M-H2O-H	C18H32O18	-0.645654	3.38723	1.46097e-06	1.77807	3.42966	795117	231835	798375	745635	854587	781873	261146	269936	200788	195472
9.01_273.0756m/z	273.076	9.00695	pos	6-Hydroxydihydrodaidzein	HMDB0041698	Phenylpropanoids and polyketides	Isoflavonoids	Isoflavans		52.9	68.3	M+H	C15H12O5	-0.445597	3.31461	1.49079e-05	6.58572	96.0506	550463	5730.97	649608	496350	592459	463434	12127.7	10796.2	0.00128576	0.00128576
1.06_118.0864m/z	118.086	1.06418	pos	L-Valine	HMDB0000883	Organic acids and derivatives	Carboxylic acids and derivatives	Amino acids, peptides, and analogues	C00183	50.4	59.5	M+H	C5H11NO2	1.53262	3.31338	0.0158609	-0.163559	0.89282	5.53734e+06	6.20208e+06	5.42293e+06	5.80008e+06	5.51281e+06	5.41354e+06	6.44675e+06	6.52416e+06	6.08711e+06	5.75029e+06
0.75_348.0701m/z	348.07	0.751433	pos	Blighinone	HMDB0030643	Benzenoids	Phenanthrenes and derivatives	Hydrophenanthrenes		36.9	0.0839	M+NH4	C16H10O8	-3.93709	3.31243	8.27299e-07	2.10502	4.30205	701066	162961	709066	660138	689930	745131	201702	188879	126071	135192
0.89_338.9886m/z	338.989	0.886183	neg	D-Glyceraldehyde 3-phosphate	HMDB0001112	Organic oxygen compounds	Organooxygen compounds	Carbohydrates and carbohydrate conjugates	C00118	48.8	47.2	2M-H	C3H7O6P	-0.532919	3.2326	0.00015148	-0.83974	0.558744	671149	1.20117e+06	746712	582885	739033	615967	1.06833e+06	1.20574e+06	1.27816e+06	1.25247e+06
9.03_898.5283n	921.518	9.02658	pos	Melilotoside C	HMDB0041466	Lipids and lipid-like molecules	Prenol lipids	Triterpenoids		54.2	73.5	M+Na, M+K, M+NH4, M+H	C47H78O16	-0.777816	3.20392	0.00108159	0.326846	1.25427	2.67039e+06	2.12904e+06	2.79167e+06	2.70109e+06	2.72428e+06	2.46452e+06	2.19004e+06	1.98849e+06	2.25391e+06	2.08373e+06
0.88_428.0366m/z	428.037	0.877533	pos	dGDP	HMDB0000960	Phenylpropanoids and polyketides	Cinnamic acids and derivatives	Hydroxycinnamic acids and derivatives	C00361	46.3	38	M+H	C10H15N5O10P2	-0.206961	3.18586	6.78503e-06	3.52052	11.4758	548912	47832.1	611871	490721	604490	488564	37311.7	60594.1	47774.9	45647.8
0.70_490.1766m/z	490.177	0.698083	pos	4-O-Methyl-a-D-glucosyl-(1->2)-b-D-xylosyl-(1->4)-D-xylose	HMDB0039742	Organic oxygen compounds	Organooxygen compounds	Carbohydrates and carbohydrate conjugates		43.3	23.7	M+NH4	C17H28O15	-0.171027	3.17831	2.82414e-07	4.6262	24.6959	515095	20857.5	464424	551275	519887	524792	36177	30144.5	0.00128576	17108.5
10.99_295.2267m/z	295.227	10.9944	pos	2-Hydroxylinolenic acid	HMDB0031103	Lipids and lipid-like molecules	Fatty Acyls	Lineolic acids and derivatives		54	73.5	M+H	C18H30O3	-0.381398	3.17081	6.8707e-06	2.55243	5.86621	598729	102064	533011	646665	548374	666865	109235	113879	91643.9	93498.2
0.79_611.1442m/z	611.144	0.790633	neg	Oxidized glutathione	HMDB0003337	Organic acids and derivatives	Carboxylic acids and derivatives	Amino acids, peptides, and analogues	C00127	56.2	87.2	M-H	C20H32N6O12S2	-0.842456	3.0765	0.000226675	-0.456168	0.72892	1.29908e+06	1.7822e+06	1.34831e+06	1.25049e+06	1.42618e+06	1.17133e+06	1.8144e+06	1.74753e+06	1.83821e+06	1.72866e+06
7.86_358.1052n	357.098	7.8606	neg	4'-Hydroxy-5,6,7,8-tetramethoxyflavone	HMDB0040724	Phenylpropanoids and polyketides	Flavonoids	O-methylated flavonoids		39.3	0	M-H, 2M-H	C19H18O7	-0.061228	3.07019	3.40703e-08	7.81824	225.697	462078	2047.34	491363	444616	475977	436355	3952.1	3760.08	256.656	220.514
6.96_563.1673m/z	563.167	6.95637	pos	Albafuran C	HMDB0030073	Phenylpropanoids and polyketides	2-arylbenzofuran flavonoids	Unclassified		51.1	65.7	M+H-H2O	C34H28O9	-4.68052	3.04576	2.33084e-06	28.4025	3.54806e+08	456194	0.00128576	499126	383070	489006	453574	0.00128576	0.00128576	0.00128576	0.00128576
6.25_595.1570m/z	595.157	6.24677	pos	Kuwanon Z	HMDB0033297	Phenylpropanoids and polyketides	Flavonoids	Flavans		38.2	0	M+H	C34H26O10	-4.77429	3.02775	0.000742171	8.84218	458.947	479827	1045.5	687530	360038	498453	373289	547.144	1184.95	1693.83	756.058
4.89_448.1005n	447.093	4.89303	neg	Trifolin	HMDB0030864	Phenylpropanoids and polyketides	Flavonoids	Flavonoid glycosides		49.2	47.1	M-H, 2M-H	C21H20O11	-0.0523746	3.00688	0.000118464	0.817565	1.76243	1.05609e+06	599222	1.11131e+06	998697	1.08323e+06	1.0311e+06	696070	656467	524763	519588
0.79_130.0863m/z	130.086	0.78795	pos	L-Pipecolic acid	HMDB0000716	Organic acids and derivatives	Carboxylic acids and derivatives	Amino acids, peptides, and analogues	C00408	47.5	45.1	M+H	C6H11NO2	0.735742	2.99819	8.30521e-05	0.163145	1.11973	4.22963e+06	3.77738e+06	4.27108e+06	4.21424e+06	4.28222e+06	4.15096e+06	3.87711e+06	3.74494e+06	3.78668e+06	3.70078e+06
1.08_262.0799n	243.062	1.08298	neg	gamma-Glutamylaspartic acid	HMDB0030419	Organic acids and derivatives	Carboxylic acids and derivatives	Amino acids, peptides, and analogues		53.3	69.8	M-H2O-H, M-H	C9H14N2O7	-0.673335	2.98552	1.18368e-07	-1.50607	0.352068	236665	672215	230469	256190	219022	240981	710527	664358	660132	653841
10.28_384.1571n	407.146	10.2832	pos	Kanzonol N	HMDB0041100	Phenylpropanoids and polyketides	Isoflavonoids	O-methylated isoflavonoids		42.4	17	M+Na, M+K, M+H	C22H24O6	-0.369102	2.95973	6.01262e-08	9.03572	524.835	428531	816.506	455763	419117	443405	395837	1968.25	1172.27	0.00128576	125.496
10.61_367.1184m/z	367.118	10.6099	neg	Edultin	HMDB0030601	Phenylpropanoids and polyketides	Coumarins and derivatives	Furanocoumarins		52.7	68.9	M-H2O-H	C21H22O7	-0.932297	2.9481	2.07905e-07	8.20771	295.643	426541	1442.76	429935	459930	381994	434303	2769.51	3001.52	0.00128576	0.00128576
12.76_379.1580m/z	379.158	12.7618	neg	6-Deoxy-gamma-mangostin	HMDB0038552	Organoheterocyclic compounds	Benzopyrans	1-benzopyrans		38	0	M-H	C23H24O5	7.57134	2.94281	0.00304606	-1.24784	0.421078	344552	818262	596395	216455	314923	250433	703164	797045	836252	936587
4.89_448.1003n	449.108	4.89415	pos	Astragalin	HMDB0037429	Phenylpropanoids and polyketides	Flavonoids	Flavonoid glycosides	C12249	48.3	44.3	M+H, M+Na, M+K	C21H20O11	-0.61214	2.9303	0.000870463	0.763501	1.69761	1.09514e+06	645111	1.1023e+06	1.12746e+06	1.12648e+06	1.02433e+06	764957	765630	530332	519524
0.79_351.0568m/z	351.057	0.790633	neg	Ascorbic acid	HMDB0000044	Organoheterocyclic compounds	Dihydrofurans	Furanones	C01041	53.1	70.9	2M-H	C6H8O6	-0.335513	2.80848	0.00285764	-0.578835	0.669504	872121	1.30264e+06	836196	855952	907416	888921	1.43588e+06	1.47094e+06	1.15383e+06	1.1499e+06
0.84_360.1499m/z	360.15	0.840033	pos	Inulobiose	HMDB0029898	Organic oxygen compounds	Organooxygen compounds	Carbohydrates and carbohydrate conjugates	C03323	50.3	57.1	M+NH4	C12H22O11	-0.412864	2.77944	3.76128e-08	1.86332	3.63844	520058	142934	517792	515495	515543	531402	167151	152096	128246	124244
10.04_437.1933m/z	437.193	10.0426	pos	Armillaripin	HMDB0030404	Lipids and lipid-like molecules	Prenol lipids	Sesquiterpenoids		45.4	31.8	M+Na	C24H30O6	-0.46909	2.77208	0.010739	0.991591	1.98838	907095	456199	693695	1.17766e+06	718962	1.03806e+06	517236	504456	395947	407157
0.70_209.0301m/z	209.03	0.703867	neg	Galactaric acid	HMDB0000639	Organic oxygen compounds	Organooxygen compounds	Carbohydrates and carbohydrate conjugates	C00879	52.6	65.8	M-H	C6H10O8	-0.911134	2.76907	2.93955e-05	-1.07893	0.473381	343437	725498	333940	320052	371235	348521	664238	675892	784892	776970
9.23_400.1883n	423.178	9.23357	pos	Armillaritin	HMDB0038918	Lipids and lipid-like molecules	Prenol lipids	Sesquiterpenoids		40.2	6.86	M+Na, M+K, M+H, M+H-H2O	C23H28O6	-0.756892	2.75641	1.18195e-08	10.0418	1054.14	370978	351.925	366919	382528	347913	386551	696.889	710.809	0.00128576	0.00128576
0.75_504.1689n	543.132	0.751433	pos	1-Kestose	HMDB0011729	Organic oxygen compounds	Organooxygen compounds	Carbohydrates and carbohydrate conjugates	C03661	43.9	31.9	M+Na, M+K	C18H32O16	-0.349344	2.74454	0.000107084	-1.76162	0.294916	159084	539421	170240	118129	176038	171928	545907	649533	494197	468045
12.57_291.1952m/z	291.195	12.5669	pos	Octyl 4-methoxycinnamic acid	HMDB0061861	Phenylpropanoids and polyketides	Cinnamic acids and derivatives	Cinnamic acid esters		50.9	58.1	M+H	C18H26O3	-1.03521	2.66954	3.41672e-06	4.81635	28.1751	363854	12914	419729	315341	365182	355162	15513.2	15018.3	10395.5	10729.1
8.53_342.1101n	341.103	8.5345	neg	4',5,6,7-Tetramethoxyflavone	HMDB0030575	Phenylpropanoids and polyketides	Flavonoids	O-methylated flavonoids	C14472	39.2	0.814	M-H, 2M-H	C19H18O6	-0.741041	2.63901	0.000143203	8.67277	408.099	353529	866.283	418325	290830	431295	273665	1686.37	1778.75	0.00128576	0.00128576
9.44_368.1258n	391.115	9.43815	pos	Cyclocurcumin	HMDB0033086	Phenylpropanoids and polyketides	Diarylheptanoids	Linear diarylheptanoids		39	0	M+Na, M+K, M+H	C21H20O6	-0.42658	2.56432	0.00164616	8.45972	352.069	352238	1000.48	437503	225308	487750	258392	2086.82	1915.1	0.00128576	0.00128576
3.64_204.0898n	203.082	3.6398	neg	(±)-Tryptophan	HMDB0030396	Organoheterocyclic compounds	Indoles and derivatives	Indolyl carboxylic acids and derivatives	C00806	44.1	25.4	M-H, 2M-H, M+FA-H	C11H12N2O2	-0.504184	2.55626	0.0290996	0.350006	1.27457	1.94447e+06	1.52559e+06	1.99118e+06	2.04076e+06	1.92027e+06	1.82566e+06	1.74805e+06	1.77727e+06	1.22755e+06	1.3495e+06
4.70_163.0399m/z	163.04	4.70093	neg	m-Coumaric acid	HMDB0001713	Phenylpropanoids and polyketides	Cinnamic acids and derivatives	Hydroxycinnamic acids and derivatives	C12621	57.8	90.9	M-H	C9H8O3	-0.971181	2.55568	1.02636e-05	2.52421	5.7526	391145	67994.4	435071	351502	429003	349004	60881.1	62256.3	75954.9	72885.4
1.23_205.0642m/z	205.064	1.234	pos	L-Cystathionine	HMDB0000099	Organic acids and derivatives	Carboxylic acids and derivatives	Amino acids, peptides, and analogues	C02291	50.1	54.5	M+H-H2O	C7H14N2O4S	0.100237	2.51817	0.000151181	-0.863175	0.549741	392742	714413	421544	362003	429446	357976	764127	778406	651365	663752
6.55_254.1882n	277.177	6.55312	pos	Lubiminol	HMDB0029604	Lipids and lipid-like molecules	Prenol lipids	Sesquiterpenoids		50.9	58.3	M+Na, M+K, M+H, M+H-H2O	C15H26O3	0.0904306	2.51175	0.00373497	4.00575	16.0639	371010	23095.9	498826	244624	505553	235034	27274.7	27317.9	17874	19916.8
8.70_314.0789n	315.086	8.70463	pos	3',7-Dihydroxy-4',8-dimethoxyisoflavone	HMDB0037918	Phenylpropanoids and polyketides	Isoflavonoids	O-methylated isoflavonoids		39.4	1.62	M+H, M+Na	C17H14O6	-0.419105	2.49748	1.97701e-07	7.8842	236.254	306295	1296.46	306200	280644	336672	301664	2191.61	2994.24	0.00128576	0.00128576
7.61_679.1780m/z	679.178	7.61285	pos	Gomphrenin II	HMDB0039898	Organic oxygen compounds	Organooxygen compounds	Carbohydrates and carbohydrate conjugates		39.4	1.35	M+H-H2O	C33H32N2O15	1.51366	2.49051	8.9888e-05	27.8559	2.42913e+08	312327	0.00128576	384574	251444	354988	258301	0.00128576	0.00128576	0.00128576	0.00128576
4.85_412.1631n	413.17	4.85385	pos	Dicaffeoylputrescine	HMDB0033467	Phenylpropanoids and polyketides	Cinnamic acids and derivatives	Hydroxycinnamic acids and derivatives		47.6	44.4	M+H, M+Na	C22H24N2O6	-0.923196	2.45709	3.49074e-06	1.31544	2.48878	496824	199626	503149	484052	528680	471414	221478	220782	190653	165590
0.76_210.0737n	209.066	0.755233	neg	D-Manno-2-heptulose	HMDB0029935	Unclassified	Unclassified	Unclassified		45	27.7	M-H, 2M-H	C7H14O7	-1.14894	2.45514	0.000517122	-0.514412	0.700078	729243	1.04166e+06	733440	855286	655500	672747	1.0457e+06	1.06212e+06	1.04469e+06	1.01413e+06
11.30_205.1951m/z	205.195	11.3027	pos	alpha-Humulene	HMDB0036467	Lipids and lipid-like molecules	Prenol lipids	Sesquiterpenoids	C09684	48.4	45.1	M+H	C15H24	0.0957254	2.43716	0.000890983	3.03177	8.17811	355020	43411	468496	261435	414170	275980	43805.7	39691.5	43678.5	46468.4
5.56_287.0561m/z	287.056	5.55607	neg	2,4',5,7-Tetrahydroxyflavanone	HMDB0040314	Phenylpropanoids and polyketides	Flavonoids	Hydroxyflavonoids		39.4	0	M-H	C15H12O6	-0.153671	2.42391	0.000302985	6.40629	84.8175	304657	3591.91	385029	227308	362980	243311	6080.79	6215.15	1003.34	1068.36
8.24_300.0997n	301.107	8.24498	pos	5,7-Dihydroxy-4'-methoxy-8-methylflavanone	HMDB0041321	Phenylpropanoids and polyketides	Flavonoids	O-methylated flavonoids		47.6	42.2	M+H, M+Na	C17H16O5	-0.245265	2.41929	1.07189e-06	8.27403	309.551	288034	930.491	312005	265044	314117	260969	1770.38	1951.58	0.00128576	0.00128576
0.74_323.0284m/z	323.028	0.738183	neg	Pseudouridine 5'-phosphate	HMDB0001271	Organic oxygen compounds	Organooxygen compounds	Carbohydrates and carbohydrate conjugates	C01168	51.6	62.5	M-H	C9H13N2O9P	-0.628812	2.40162	3.54804e-07	1.40788	2.65347	453009	170724	467595	455705	448284	440453	189328	187584	156040	149942
1.38_161.0455m/z	161.045	1.38432	neg	3-Hydroxymethylglutaric acid	HMDB0000355	Lipids and lipid-like molecules	Fatty Acyls	Fatty acids and conjugates	C03761	47.3	39	M-H	C6H10O5	-0.538797	2.39505	5.97144e-06	0.946698	1.92746	588359	305252	626597	569195	588325	569321	275072	290029	324561	331345
6.73_286.0477n	285.04	6.73277	neg	Kaempferol	HMDB0005801	Phenylpropanoids and polyketides	Flavonoids	Flavones	C05903	43.3	18.6	M-H, 2M-H	C15H10O6	-0.0215938	2.37861	0.000193333	1.49383	2.81636	446054	158379	503468	416065	503766	360915	153908	171273	143275	165062
6.95_316.0583n	315.051	6.94717	neg	Pollenitin	HMDB0038572	Phenylpropanoids and polyketides	Flavonoids	Flavones		53.7	71.7	M-H, 2M-H	C16H12O7	0.0394446	2.36775	7.5663e-05	4.18444	18.182	298090	16394.8	350721	258459	346453	236726	17028.4	18966.8	13599.1	15984.8
4.99_520.2322m/z	520.232	4.99473	pos	Isocycloheterophyllin	HMDB0029471	Phenylpropanoids and polyketides	Cinnamic acids and derivatives	Hydroxycinnamic acids and derivatives		40.6	14.4	M+NH4	C30H30O7	-1.4848	2.3583	1.97011e-06	2.46082	5.50529	333908	60652.2	347472	327316	348957	311887	80709.5	83230	44041.1	34628.2
10.26_377.1013m/z	377.101	10.2636	pos	Isolicoflavonol	HMDB0037249	Phenylpropanoids and polyketides	Flavonoids	Flavones		38.8	3.38	M+Na	C20H18O6	4.99441	2.34518	0.00138759	7.85346	231.275	293449	1268.83	398927	200881	367443	206544	2549.67	2525.66	0.00128576	0.00128576
11.28_278.1517n	279.159	11.2814	pos	Dibutyl phthalate	HMDB0033244	Benzenoids	Benzene and substituted derivatives	Benzoic acids and derivatives	C14214	40.5	14.9	M+H, M+Na, M+K	C16H22O4	-0.348404	2.3374	0.0222378	0.210962	1.15746	2.50808e+06	2.16688e+06	2.45098e+06	2.58057e+06	2.45258e+06	2.54819e+06	2.45243e+06	2.00887e+06	2.20655e+06	1.99968e+06
12.13_746.6046m/z	746.605	12.1309	pos	Ubiquinol 8	HMDB0001060	Lipids and lipid-like molecules	Prenol lipids	Quinone and hydroquinone lipids		44.4	46.5	M+NH4	C49H76O4	-4.95756	2.33705	0.0365621	-0.937438	0.522159	393588	753770	714342	142709	436715	280586	682617	652079	785238	895147
7.87_358.1051n	359.112	7.87238	pos	7-Hydroxy-3',4',5,6-tetramethoxyflavone	HMDB0038845	Phenylpropanoids and polyketides	Flavonoids	O-methylated flavonoids		42.1	15.4	M+H, M+Na	C19H18O7	-0.48528	2.30456	2.08457e-09	8.65813	403.977	259462	642.27	261712	254531	271239	250367	983.244	1585.83	0.00128576	0.00128576
6.59_270.0529n	269.046	6.58833	neg	8-Hydroxydaidzein	HMDB0033860	Phenylpropanoids and polyketides	Isoflavonoids	Isoflav-2-enes		48.7	46	M-H, 2M-H	C15H10O5	0.242756	2.2734	0.000110334	3.41676	10.6794	287800	26949	327494	234853	348053	240801	28856.4	29297.2	22237.8	27404.8
1.08_148.0426m/z	148.043	1.08162	pos	Methionine sulfoxide	HMDB0002005	Organic acids and derivatives	Carboxylic acids and derivatives	Amino acids, peptides, and analogues	C02989	39.5	0	M+H-H2O	C5H11NO3S	-0.17704	2.27286	3.59327e-09	-3.71071	0.0763774	20823.6	272641	24001	19320.2	22931.8	17041.5	286191	266906	270817	266651
4.93_508.1215n	509.129	4.93425	pos	Limocitrin 3-glucoside	HMDB0029517	Phenylpropanoids and polyketides	Flavonoids	Flavonoid glycosides		52.7	66.4	M+H, M+Na	C23H24O13	-0.308569	2.25506	3.61797e-06	-2.47061	0.180415	55146.8	305667	56708.1	54868.1	52690.4	56320.7	265163	331222	328659	297626
5.24_283.0611m/z	283.061	5.23617	neg	Melanettin	HMDB0041758	Phenylpropanoids and polyketides	Neoflavonoids	Neoflavones	C10504	45.8	32.8	M-H	C16H12O5	-0.493013	2.22752	1.21398e-05	4.28926	19.5521	259133	13253.4	228511	280342	226768	300913	16155.8	16614.7	10061.7	10181.5
3.63_408.1794n	409.187	3.63207	pos	3-O-Methylniveusin A	HMDB0039084	Lipids and lipid-like molecules	Prenol lipids	Terpene lactones		38.8	0.667	M+H, M+Na	C21H28O8	2.52213	2.21166	0.0452353	0.303162	1.23385	1.7511e+06	1.41922e+06	1.73626e+06	1.68002e+06	1.79955e+06	1.78856e+06	1.62899e+06	1.64042e+06	1.28486e+06	1.1226e+06
0.70_147.0764m/z	147.076	0.698083	pos	Ureidoisobutyric acid	HMDB0002031	Organic acids and derivatives	Organic carbonic acids and derivatives	Ureas	C05100	53.9	76	M+H	C5H10N2O3	-0.356134	2.20655	0.000622418	-0.254206	0.838448	1.31342e+06	1.56649e+06	1.31375e+06	1.2716e+06	1.27594e+06	1.3924e+06	1.51867e+06	1.5583e+06	1.64339e+06	1.5456e+06
0.77_356.0955n	355.088	0.772617	neg	2-O-beta-D-Glucopyranuronosyl-D-mannose	HMDB0039722	Organic oxygen compounds	Organooxygen compounds	Carbohydrates and carbohydrate conjugates		54.4	75.2	M-H2O-H, M-H	C12H20O12	0.201089	2.18077	0.0029689	-0.531088	0.692033	584708	844914	659518	560330	644896	474089	827822	870267	918541	763026
9.09_383.1136m/z	383.114	9.09168	neg	Glyceollin I	HMDB0033901	Organosulfur compounds	Thiols	Alkylthiols		44.3	24.6	M+FA-H	C20H18O5	-0.151311	2.17518	1.01253e-08	8.03166	261.68	231676	885.341	227900	232101	220754	245948	1763.32	1778.04	0.00128576	0.00128576
8.38_222.1984n	205.195	8.38413	pos	Pogostol	HMDB0033239	Lipids and lipid-like molecules	Prenol lipids	Sesquiterpenoids		44.9	27.1	M+H-H2O, M+H	C15H26O	0.0623115	2.11702	0.00270547	3.76527	13.5975	263137	19351.8	353855	173579	344380	180733	21974.9	22839.9	16046.2	16546.3
12.13_335.1513m/z	335.151	12.1309	pos	Hydrocinchonine	HMDB0030283	Alkaloids and derivatives	Cinchona alkaloids	Unclassified		40.4	9.71	M+K	C19H24N2O	-2.37942	2.09645	1.61952e-06	-0.463108	0.725422	570215	786046	550884	573298	574752	581925	807877	772600	767648	796058
9.01_227.0702m/z	227.07	9.00695	pos	Oroselone	HMDB0033925	Phenylpropanoids and polyketides	Coumarins and derivatives	Furanocoumarins		51.5	60.9	M+H	C14H10O3	-0.396428	2.08899	2.01614e-05	6.58673	96.1179	219078	2279.26	262193	195353	234646	184119	4748.76	4368.28	0.00128576	0.00128576
1.08_192.0270n	215.016	1.08162	pos	Citric acid	HMDB0000094	Organic acids and derivatives	Carboxylic acids and derivatives	Tricarboxylic acids and derivatives	C00158	48.7	46.8	M+NH4, M+Na	C6H8O7	-0.176031	2.0847	2.27052e-07	3.29129	9.78986	236710	24179.1	240936	247582	235043	223277	36137.3	34498.7	13948.9	12131.3
9.56_879.4718m/z	879.472	9.5632	neg	Pitheduloside D	HMDB0031358	Lipids and lipid-like molecules	Prenol lipids	Terpene glycosides		48.8	52.2	M-H2O-H	C46H74O17	-3.2963	2.06852	0.00446312	-0.46578	0.724079	624937	863078	594119	647848	611360	646422	978791	909059	736890	827572
10.87_276.2088n	277.216	10.8703	pos	4,8,12,15-Octadecatetraenoic acid	HMDB0032672	Lipids and lipid-like molecules	Fatty Acyls	Lineolic acids and derivatives		49.3	51.1	M+H-H2O, M+H	C18H28O2	-0.505386	2.06412	1.85461e-07	2.22434	4.67298	265112	56733.1	263695	252080	260786	283887	61811.4	64884.5	47625.9	52610.3
10.04_117.0701m/z	117.07	10.0426	pos	Chavicol	HMDB0034107	Benzenoids	Phenols	1-hydroxy-2-unsubstituted benzenoids	C16930	58	93.2	M+H-H2O	C9H10O	1.54099	2.05137	1.18189e-05	8.53329	370.491	208952	563.988	237020	172784	233902	192103	1044.92	1109.32	49.3203	52.3897
0.74_527.1027m/z	527.103	0.738183	neg	(-)-Epigallocatechin 3-glucuronide	HMDB0041639	Phenylpropanoids and polyketides	Flavonoids	Flavonoid glycosides		37	0	M+FA-H	C21H22O13	-3.12617	2.03563	1.57378e-05	6.96696	125.102	207158	1655.91	225492	185784	243265	174091	6623.65	0.00128576	0.00128576	0.00128576
7.55_591.1259m/z	591.126	7.55332	pos	Mulberrofuran M	HMDB0033261	Phenylpropanoids and polyketides	2-arylbenzofuran flavonoids	Unclassified		38.4	0.433	M+H	C34H22O10	-4.46251	2.03455	0.000155486	8.85445	462.867	210323	454.391	252015	165849	255175	168251	452.254	562.904	338.6	463.804
1.21_152.0567m/z	152.057	1.21402	pos	Guanine	HMDB0000132	Organoheterocyclic compounds	Imidazopyrimidines	Purines and purine derivatives	C00242	43	21	M+H	C5H5N5O	0.190422	2.03434	7.63486e-06	-2.5611	0.169446	41718	246203	36624.5	44527.8	43587.3	42132.6	216468	227229	273862	267252
10.59_357.1331m/z	357.133	10.5875	pos	Kievitol	HMDB0038112	Phenylpropanoids and polyketides	Isoflavonoids	Isoflavans		39.1	0.705	M+H-H2O	C20H22O7	-0.533572	2.03252	0.00137344	8.21933	298.032	220125	738.593	291287	149618	284376	155217	1340.82	1613.55	0.00128576	0.00128576
0.76_105.0192m/z	105.019	0.755233	neg	Glyceric acid	HMDB0000139	Organic oxygen compounds	Organooxygen compounds	Carbohydrates and carbohydrate conjugates	C00258	44.8	27.4	M-H	C3H6O4	-1.715	2.03189	2.98545e-06	-1.20347	0.434231	155977	359203	153785	166208	154805	149109	383252	375079	338823	339657
1.06_130.0864m/z	130.086	1.06418	pos	(2R,3R,4R)-2-Amino-4-hydroxy-3-methylpentanoic acid	HMDB0029449	Organic acids and derivatives	Carboxylic acids and derivatives	Amino acids, peptides, and analogues		49.1	53.6	M+H-H2O	C6H13NO3	0.907857	2.03073	0.000824667	0.174136	1.12829	1.89894e+06	1.68303e+06	1.88707e+06	1.97197e+06	1.88234e+06	1.85438e+06	1.74791e+06	1.66371e+06	1.68562e+06	1.63488e+06
10.15_281.1182m/z	281.118	10.1494	neg	Myrigalone E	HMDB0030755	Phenylpropanoids and polyketides	Linear 1,3-diarylpropanoids	Chalcones and dihydrochalcones		43.6	21.3	M-H2O-H	C18H20O4	-0.542751	2.02265	2.71339e-07	8.55269	375.506	200639	534.317	204529	197680	219474	180874	1095.43	1041.83	0.00128576	0.00128576
2.31_378.1340m/z	378.134	2.30762	neg	Simulansamide	HMDB0030435	Alkaloids and derivatives	Benzophenanthridine alkaloids	Secobenzophenanthridine alkaloids		42.2	21.2	M-H2O-H	C22H23NO6	-1.65553	2.01755	0.00768058	-3.8248	0.0705703	17738.4	251358	17562.3	17448.1	18386	17557.2	348115	360077	152740	144500
11.45_359.0912m/z	359.091	11.449	pos	Naphthoherniarin	HMDB0039025	Benzenoids	Naphthalenes	Naphthoquinones		41	10.8	M+H-H2O	C22H16O6	-0.620911	2.01583	3.64268e-05	7.20938	147.992	204162	1379.54	225515	167724	245569	177841	2308.4	2724.44	0.00128576	485.343
8.75_372.1206n	395.11	8.7453	pos	Sinensetin	HMDB0036633	Phenylpropanoids and polyketides	Flavonoids	O-methylated flavonoids	C10186	39	0	M+H, M+Na	C20H20O7	-0.759729	1.97671	0.00213445	27.2872	1.63786e+08	210590	0.00128576	279257	142901	283720	136480	0.00128576	0.00128576	0.00128576	0.00128576
5.64_351.0179m/z	351.018	5.6406	neg	(-)-Epicatechin sulfate	HMDB0012467	Phenylpropanoids and polyketides	Flavonoids	Sulfated flavonoids		54.4	77.4	M-H2O-H	C15H14O9S	-0.271936	1.97189	1.02025e-05	0.39345	1.31353	805989	613605	821431	782214	830333	789976	594076	609598	618069	632675
1.14_205.1183m/z	205.118	1.13595	pos	N6-Acetyl-5S-hydroxy-L-lysine	HMDB0033891	Organic acids and derivatives	Carboxylic acids and derivatives	Amino acids, peptides, and analogues		49.9	52.5	M+H	C8H16N2O4	0.0552725	1.9617	5.11772e-07	-2.98298	0.126483	27293.6	215788	25424.7	28566.9	27934.3	27248.4	204896	206870	240633	210753
0.70_307.0435m/z	307.044	0.703867	neg	Protocatechuic acid	HMDB0001856	Benzenoids	Benzene and substituted derivatives	Benzoic acids and derivatives	C00230	37.8	0	2M-H	C7H6O4	-7.90795	1.95763	3.65072e-09	-3.48171	0.0895162	18365.2	205161	16930.8	18760.5	16812.9	20956.9	213720	197709	207601	201615
13.21_506.3607n	529.35	13.2119	pos	Theasapogenol A	HMDB0034519	Lipids and lipid-like molecules	Prenol lipids	Triterpenoids		39.3	0	M+NH4, M+Na	C30H50O6	-0.00250709	1.94579	1.8509e-05	4.49295	22.5171	196874	8743.31	172588	203150	173994	237766	4965.04	11132.3	7122.52	11753.4
5.87_379.0129m/z	379.013	5.87408	neg	Tectorigenin 4'-sulfate	HMDB0041777	Phenylpropanoids and polyketides	Isoflavonoids	Isoflav-2-enes		50.3	59.3	M-H	C16H12O9S	-0.193651	1.94512	7.77643e-07	1.20162	2.29998	328145	142673	332838	316112	344031	319600	130697	133645	151481	154871
9.07_407.1100m/z	407.11	9.06775	pos	Piperenol A	HMDB0039634	Benzenoids	Benzene and substituted derivatives	Benzoic acids and derivatives		39	0	M+Na	C21H20O7	-0.323949	1.94328	2.49848e-10	9.55274	751.036	184204	245.266	186895	189238	180611	180070	630.603	350.458	0.00128576	0.00128576
4.93_507.1141m/z	507.114	4.93482	neg	Spinacetin 3-glucoside	HMDB0037468	Phenylpropanoids and polyketides	Flavonoids	Flavonoid glycosides		49.3	49.8	M-H	C23H24O13	-0.65362	1.93436	1.55807e-07	-2.28898	0.20462	47053.8	229957	49714.8	44650.9	46741.2	47108.1	219261	217878	240446	242244
0.61_132.0902n	133.097	0.610317	pos	Ornithine	HMDB0000214	Organic acids and derivatives	Carboxylic acids and derivatives	Amino acids, peptides, and analogues	C00077	49.8	56.7	M+H-H2O, M+H	C5H12N2O2	2.08247	1.9174	5.09672e-06	-0.517667	0.698501	420182	601548	433037	412614	427154	407922	612678	612907	610041	570568
3.90_286.1053n	285.098	3.89775	neg	Isosalicin	HMDB0034023	Organic oxygen compounds	Organooxygen compounds	Carbohydrates and carbohydrate conjugates		53.3	69.2	M-H, 2M-H	C13H18O7	0.157543	1.91016	1.42472e-09	2.60279	6.07461	212865	35041.8	209912	218151	207091	216306	32398.1	32901.4	37717.4	37150.3
1.08_429.1179m/z	429.118	1.08162	pos	omega-Salicoyisalicin	HMDB0031423	Organic oxygen compounds	Organooxygen compounds	Carbohydrates and carbohydrate conjugates		44.8	42.2	M+Na	C20H22O9	5.64292	1.90576	8.99682e-05	-1.67874	0.312355	83118.7	266103	94979.4	80297.2	83149.2	74048.9	302491	295594	240139	226189
9.96_339.0871m/z	339.087	9.95973	neg	Glyzarin	HMDB0029534	Phenylpropanoids and polyketides	Isoflavonoids	Isoflav-2-enes		52	64.4	M+FA-H	C18H14O4	-0.991214	1.90534	0.0004662	7.92999	243.874	188311	772.167	240451	147320	229964	135509	1811.83	1276.83	0.00128576	0.00128576
10.69_454.3446n	455.352	10.6859	pos	Ursonic acid	HMDB0036007	Lipids and lipid-like molecules	Prenol lipids	Triterpenoids		46.6	40	M+H-H2O, M+H	C30H46O3	-0.172653	1.88423	2.53253e-08	10.5513	1500.62	173360	115.525	173517	161930	184758	173235	0.00128576	0.00128576	0.00128576	462.098
11.30_383.2427m/z	383.243	11.3027	pos	Sarcostin	46173994	Unclassified	Unclassified	Unclassified		38.9	0.619	M+H	C21H34O6	-0.216724	1.85747	5.48808e-05	8.9797	504.847	173301	343.275	143524	193728	145002	210951	574.421	615.134	121.366	62.179
12.13_278.2245n	279.232	12.1309	pos	Alpha-Linolenic acid	HMDB0001388	Lipids and lipid-like molecules	Fatty Acyls	Lineolic acids and derivatives	C06427	51.3	59.7	M+H-H2O, M+H	C18H30O2	-0.29248	1.85005	0.0330334	-0.691295	0.619298	362817	585852	273631	395033	351639	430965	507859	710390	417390	707770
0.79_174.0761m/z	174.076	0.78795	pos	N-Acetyl-L-glutamate 5-semialdehyde	HMDB0006488	Organic acids and derivatives	Carboxylic acids and derivatives	Amino acids, peptides, and analogues	C01250	47.6	41.3	M+H	C7H11NO4	0.317125	1.84514	0.000788803	-0.584848	0.666719	356410	534572	354528	338140	377772	355198	590868	563805	517563	466052
9.88_370.1415n	393.131	9.88027	pos	Xanthohumol D	HMDB0035003	Phenylpropanoids and polyketides	Linear 1,3-diarylpropanoids	Chalcones and dihydrochalcones		47.2	41.2	M+H, M+Na	C21H22O6	-0.500508	1.82909	0.000171508	9.81245	899.173	170046	189.114	207020	135430	204354	133380	756.453	0.00128576	0.00128576	0.00128576
1.32_131.0582n	130.051	1.32185	neg	4-Hydroxyproline	HMDB0000725	Organic acids and derivatives	Carboxylic acids and derivatives	Amino acids, peptides, and analogues	C01157	45.7	30.6	M-H, 2M-H	C5H9NO3	-0.551787	1.82627	5.15699e-10	-2.1794	0.220767	46039.1	208542	47867.7	44867.9	46508.3	44912.5	213226	211208	204540	205194
1.08_148.0371n	147.03	1.08298	neg	Citramalic acid	HMDB0000426	Lipids and lipid-like molecules	Fatty Acyls	Fatty acids and conjugates	C00815	47.7	40.2	M-H2O-H, M-H	C5H8O5	-0.313285	1.80904	0.000190493	-0.472124	0.720902	430171	596712	445011	433687	415171	426816	609916	644701	554710	577521
12.76_280.2401n	279.233	12.7618	neg	Linoleic acid	HMDB0000673	Lipids and lipid-like molecules	Fatty Acyls	Lineolic acids and derivatives	C01595	40.4	5.21	M-H, 2M-H, M+FA-H	C18H32O2	-0.594114	1.80866	3.73373e-06	-0.690379	0.619691	262616	423785	263721	249863	278193	258685	418035	429217	443013	404874
13.73_310.3101m/z	310.31	13.7284	pos	Geranylcitronellol	HMDB0032147	Lipids and lipid-like molecules	Prenol lipids	Diterpenoids		54.1	75	M+NH4	C20H36O	-1.15649	1.79893	0.01659	0.694993	1.61888	514247	317657	509104	510865	467712	569307	205456	316208	278221	470742
10.28_383.1499m/z	383.15	10.2759	neg	6-Hydroxy-4-methoxy-3-(3-methyl-2-butenyl)-2-(2-phenylethenyl)benzoic acid	HMDB0039439	Phenylpropanoids and polyketides	Stilbenes	Unclassified	C10264	43.6	21.2	M+FA-H	C21H22O4	-0.262813	1.79856	1.47466e-12	7.71858	210.632	158274	751.425	157425	157034	160209	158428	1642.68	1363.02	0.00128576	0.00128576
7.79_386.1364n	409.126	7.79318	pos	(R)-Heraclenol 2'-(3-methyl-2-butenoate)	HMDB0039058	Phenylpropanoids and polyketides	Coumarins and derivatives	Furanocoumarins		49.9	54.1	M+H, M+Na	C21H22O7	-0.345007	1.79646	0.000206697	10.4824	1430.55	164420	114.935	197221	129078	202854	128527	459.736	0.00128576	0.00128576	0.00128576
0.81_173.0091m/z	173.009	0.807767	neg	Dehydroascorbic acid	HMDB0001264	Organoheterocyclic compounds	Lactones	Gamma butyrolactones	C05422	49.9	52.5	M-H	C6H6O6	-0.562645	1.79469	8.97985e-06	1.13025	2.18897	293357	134016	274257	306547	275444	317182	125568	130019	138502	141975
12.57_178.0630n	179.07	12.5669	pos	4-Methoxycinnamic acid	HMDB0002040	Phenylpropanoids and polyketides	Cinnamic acids and derivatives	Cinnamic acids		48.1	42.3	M+H-H2O, M+H	C10H10O3	-0.13308	1.77332	5.86164e-06	4.68053	25.6436	161502	6297.96	189742	139605	159904	156759	7273.2	8164.97	4860.66	4893.02
6.75_396.2121n	395.205	6.75443	neg	Isopetasoside	HMDB0029622	Lipids and lipid-like molecules	Prenol lipids	Terpene glycosides		37.2	0	M-H, M+FA-H	C21H32O7	-6.83053	1.76824	4.31039e-07	-1.07857	0.473497	137701	290817	147304	136855	138944	127700	290500	285422	305653	281692
0.72_432.1709m/z	432.171	0.715617	pos	a-L-Arabinofuranosyl-(1->3)-[a-L-arabinofuranosyl-(1r5)]-L-arabinose	HMDB0041223	Organic oxygen compounds	Organooxygen compounds	Carbohydrates and carbohydrate conjugates		52.4	71.8	M+NH4	C15H26O13	-0.636145	1.76655	4.90578e-05	1.17513	2.25813	280172	124072	260472	312849	289001	258365	139364	135679	113715	107531
1.23_175.1078m/z	175.108	1.234	pos	N-Acetylornithine	HMDB0003357	Organic acids and derivatives	Carboxylic acids and derivatives	Amino acids, peptides, and analogues	C00437	50.1	54.4	M+H	C7H14N2O3	0.371939	1.76496	8.27559e-09	-3.55016	0.085368	14178.6	166088	15082.1	13569.4	14252.5	13810.2	157705	165849	166583	174213
5.73_384.1438m/z	384.144	5.72982	pos	Wampetin	HMDB0030080	Phenylpropanoids and polyketides	Coumarins and derivatives	Furanocoumarins		51	61	M+NH4	C21H18O6	-1.03793	1.76355	0.000431813	9.79461	888.121	160773	181.026	120689	200845	121101	200458	166.692	0.00128576	557.411	0.00128576
0.76_285.0827m/z	285.083	0.755233	neg	Vicine	HMDB0034073	Organic oxygen compounds	Organooxygen compounds	Carbohydrates and carbohydrate conjugates	C08437	46.7	43	M-H2O-H	C10H16N4O7	-4.61274	1.76123	2.83315e-09	-4.02469	0.0614393	9898.55	161111	5771	12960.4	10952.3	9910.49	158136	166737	156322	163250
10.30_277.2161m/z	277.216	10.3021	pos	Stearidonic acid	HMDB0006547	Lipids and lipid-like molecules	Fatty Acyls	Lineolic acids and derivatives	C16300	51.5	61.1	M+H	C18H28O2	-0.463363	1.75041	4.99275e-05	-0.402352	0.756624	476764	630120	497382	450022	492810	466841	625010	608333	630909	656227
5.36_271.0598m/z	271.06	5.36197	pos	Genistein	HMDB0003217	Phenylpropanoids and polyketides	Isoflavonoids	Isoflav-2-enes	C06563	47.3	41	M+H	C15H10O5	-1.12362	1.74532	1.23378e-07	7.21628	148.702	149898	1008.04	150087	135127	156378	158001	1577.09	1648.13	351.821	455.134
9.84_385.1292m/z	385.129	9.8363	neg	(S)-4',5,7-Trihydroxy-3'-prenylflavanone	HMDB0029866	Phenylpropanoids and polyketides	Flavonoids	Flavans		54.8	76	M+FA-H	C20H20O5	-0.193953	1.73946	6.96222e-06	7.03862	131.473	150566	1145.22	164406	125687	170427	141742	2155.29	2425.59	0.00128576	0.00128576
3.65_392.1483m/z	392.148	3.64958	pos	7-Hydroxydehydroglaucine	HMDB0033084	Alkaloids and derivatives	Aporphines	Unclassified		38	5.01	M+Na	C21H23NO5	3.8454	1.73707	1.92247e-05	1.98516	3.95906	200594	50667	187947	219826	177864	216739	62473.1	61891.9	39559.9	38743.1
9.88_699.3557m/z	699.356	9.88027	pos	(S)-Nerolidol 3-O-[a-L-Rhamnopyranosyl-(1->4)-a-L-rhamnopyranosyl-(1->2)-b-D-glucopyranoside]	HMDB0040845	Organic oxygen compounds	Organooxygen compounds	Carbohydrates and carbohydrate conjugates		54.2	74.8	M+Na	C33H56O14	-0.79809	1.72571	4.95984e-06	-1.60864	0.327907	71646.5	218496	67244	68903.7	73682.9	76755.2	241212	220424	216844	195504
9.46_253.0869m/z	253.087	9.46107	neg	Chalcone	HMDB0003066	Phenylpropanoids and polyketides	Linear 1,3-diarylpropanoids	Chalcones and dihydrochalcones	C15589	45.7	30.5	M+FA-H	C15H12O	-0.39612	1.71758	9.27604e-07	9.26122	613.628	144901	236.138	159855	133295	154296	132156	456.695	439.934	34.4537	13.4674
0.81_148.0427m/z	148.043	0.805	pos	Ethiin	HMDB0037057	Organic acids and derivatives	Carboxylic acids and derivatives	Amino acids, peptides, and analogues		38.5	0	M+H-H2O	C5H11NO3S	-0.147883	1.71581	3.50495e-08	-4.24557	0.0527176	7997.09	151697	11645.3	5871.9	9529.31	4941.89	162210	151835	147642	145100
9.34_311.2228m/z	311.223	9.33938	neg	9,10,13-TriHOME	HMDB0004710	Lipids and lipid-like molecules	Fatty Acyls	Fatty acids and conjugates	C14835	52.1	64.5	M-H2O-H	C18H34O5	0.104184	1.71492	8.32228e-09	2.04814	4.13571	189160	45738.3	190516	184497	189038	192590	49970.5	50855	41171.2	40956.5
3.89_286.1051n	309.094	3.8887	pos	3-Hydroxybenzyl alcohol glucoside	HMDB0038331	Organic oxygen compounds	Organooxygen compounds	Carbohydrates and carbohydrate conjugates	C03351	47.6	41.8	M+NH4, M+Na	C13H18O7	-0.394455	1.70621	1.31447e-08	2.62922	6.1869	169365	27374.8	166906	174481	170855	165220	22775.1	22606.9	31260.4	32856.7
0.77_325.0775m/z	325.078	0.772617	neg	3-O-alpha-D-Glucopyranuronosyl-D-xylose	HMDB0039723	Organic oxygen compounds	Organooxygen compounds	Carbohydrates and carbohydrate conjugates		50.5	55.7	M-H	C11H18O11	-0.399512	1.69574	0.00899123	-0.548554	0.683705	360342	527043	337954	350270	368421	384723	579386	618243	471065	439478
3.85_783.2343m/z	783.234	3.84793	pos	Kaempferol 3-(2''-rhamnosyl-6''-acetylgalactoside) 7-rhamnoside	HMDB0040541	Phenylpropanoids and polyketides	Flavonoids	Flavonoid glycosides		47.2	43.7	M+H	C35H42O20	0.149934	1.69387	0.000109987	-6.87744	0.00850519	1242.93	146138	1870.38	0.00128576	1215.22	1886.12	175747	172665	117509	118630
6.59_271.0599m/z	271.06	6.59422	pos	Aloeemodin	HMDB0030829	Benzenoids	Anthracenes	Anthraquinones	C10294	39.2	0	M+H	C15H10O5	-0.729794	1.68689	0.000234322	3.55807	11.7784	158608	13466	185923	133210	194761	120537	15647	13864.9	11593.2	12758.9
5.34_287.0560m/z	287.056	5.34285	neg	Aromadendrin	HMDB0030847	Phenylpropanoids and polyketides	Flavonoids	Flavans	C00974	56.5	85.9	M-H	C15H12O6	-0.408477	1.68442	0.000161212	1.3884	2.61788	232878	88956.7	247464	227799	241574	214675	117704	114233	60916.2	62974.3
0.63_309.1317m/z	309.132	0.63165	neg	L-Histidine	HMDB0000177	Organic acids and derivatives	Carboxylic acids and derivatives	Amino acids, peptides, and analogues	C00135	43.3	21.2	2M-H	C6H9N3O2	-0.0793405	1.6716	6.59018e-06	-1.00566	0.498042	136873	274822	137886	117209	149809	142587	290274	275067	258979	274966
6.35_358.1415n	341.138	6.34907	pos	5-Deoxykievitone hydrate	HMDB0038113	Phenylpropanoids and polyketides	Isoflavonoids	Isoflavans		47.9	44	M+H-H2O, M+H	C20H22O6	-0.475876	1.66214	0.00751231	0.592807	1.50818	469754	311471	422022	513993	467722	475280	413334	302736	274433	255382
8.55_269.0818m/z	269.082	8.5507	neg	3-(4-Hydroxyphenyl)-1-(4-hydroxy-2-methoxyphenyl)-2-propen-1-one	HMDB0037319	Phenylpropanoids and polyketides	Linear 1,3-diarylpropanoids	Cinnamylphenols	C15531	42.1	14.2	M-H	C16H14O4	-0.555879	1.66099	0.000107693	8.3508	326.469	139625	427.682	164053	114439	168828	111179	904.051	748.161	58.5135	0.00128576
0.75_230.0958m/z	230.096	0.751433	pos	Ergothioneine	HMDB0003045	Organic acids and derivatives	Carboxylic acids and derivatives	Amino acids, peptides, and analogues	C05570	40.1	14.2	M+H	C9H15N3O2S	0.0327695	1.66059	8.01126e-05	0.940323	1.91896	289652	150942	272582	273464	305492	307071	167068	172549	136629	127524
9.52_384.1207n	407.11	9.51822	pos	5-Methoxyhinokinin	HMDB0038950	Lignans, neolignans and related compounds	Furanoid lignans	Tetrahydrofuran lignans		38.7	0	M+NH4, M+Na	C21H20O7	-0.562514	1.65835	1.16632e-07	10.0049	1027.45	134507	130.913	144871	129464	139412	124282	523.649	0.00128576	0.00128576	0.00128576
4.83_400.1387m/z	400.139	4.83308	pos	Adlumidiceine	HMDB0040552	Phenylpropanoids and polyketides	Stilbenes	Unclassified		40.2	6.53	M+H	C21H21NO7	-1.02432	1.65822	0.000402875	2.95841	7.77266	162693	20931.4	126427	200233	130716	193395	24993.9	26770.1	20600.9	11360.7
0.68_399.1444m/z	399.144	0.680633	pos	4'-Methylliquiritigenin 7-rhamnoside	HMDB0040545	Phenylpropanoids and polyketides	Flavonoids	Flavonoid glycosides		37.6	3.24	M+H-H2O	C22H24O8	1.34313	1.65626	1.62348e-06	-1.63404	0.322186	64028	198730	73134.1	45563.6	68063.4	69350.7	205392	188512	203207	197809
6.94_317.0653m/z	317.065	6.93693	pos	Isorhamnetin	HMDB0002655	Phenylpropanoids and polyketides	Flavonoids	Flavones	C10084	56.8	88.8	M+H	C16H12O7	-0.73495	1.64492	3.62487e-05	4.399	21.0975	141712	6717.03	160051	127833	165038	113927	8719.71	7954.08	4516.81	5677.51
0.68_171.0167m/z	171.017	0.680633	pos	Ureidopropionic acid	HMDB0000026	Organic acids and derivatives	Organic carbonic acids and derivatives	Ureas	C02642	39.5	0	M+K	C4H8N2O3	0.410088	1.63486	8.83882e-07	0.481965	1.39664	461506	330439	450717	463684	467157	464466	325032	325798	346161	324765
0.70_191.1026m/z	191.103	0.698083	pos	N-(gamma-Glutamyl)ethanolamine	HMDB0039222	Organic acids and derivatives	Carboxylic acids and derivatives	Amino acids, peptides, and analogues		56.5	85.9	M+H	C7H14N2O4	-0.185926	1.63339	0.000460662	-0.356531	0.78104	491701	629547	490548	499054	460411	516791	645567	666698	609506	596415
0.81_250.0324n	499.06	0.807767	neg	(E)-2-Propenyl [3-(2-propenylthio)-2-propenyl] sulfate	HMDB0039464	Organic acids and derivatives	Organic sulfuric acids and derivatives	Sulfuric acid esters		36.7	0	M-H, 2M-H	C9H14O4S2	-3.77523	1.63273	1.14278e-06	1.58654	3.00327	196105	65297.2	197893	184983	204642	196902	75522.2	73248.9	56927.8	55489.8
10.20_236.1775n	259.167	10.2023	pos	Isolubimin	HMDB0035648	Lipids and lipid-like molecules	Prenol lipids	Sesquiterpenoids		41.4	12	M+H, M+Na, M+NH4	C15H24O2	-0.357157	1.62943	1.96897e-07	2.82827	7.1022	151110	21276.5	160690	142756	152340	148653	26401.4	27069.4	16969.4	14665.6
4.67_464.0953n	465.103	4.67327	pos	Quercetin 3-galactoside	HMDB0030775	Phenylpropanoids and polyketides	Flavonoids	Flavonoid glycosides	C10073	51.4	60.5	M+H, M+Na	C21H20O12	-0.315951	1.61454	0.000511417	-0.708807	0.611826	212691	347633	211459	187595	224897	226813	320254	316430	390393	363456
9.81_339.0871m/z	339.087	9.81495	neg	QUERCETIN TETRAMETHYL (5,7,3',4') ETHER	97142	Unclassified	Unclassified	Unclassified		39	0	M-H2O-H	C19H18O7	-0.808579	1.61004	3.96757e-09	9.00046	512.164	126619	247.225	119833	130734	125978	129934	637.379	351.517	0.00128576	0.00128576
7.41_312.0999n	357.098	7.40785	neg	Cabreuvin	HMDB0030679	Phenylpropanoids and polyketides	Isoflavonoids	O-methylated isoflavonoids		39.7	2.05	M-H2O-H, M+FA-H	C18H16O5	0.390289	1.60937	1.50725e-10	7.64859	200.658	126800	631.922	130956	126271	124719	125254	1143.75	955.19	214.027	214.72
0.72_781.2016m/z	781.202	0.72095	neg	6'''-O-Sinapoylsaponarin	HMDB0035005	Phenylpropanoids and polyketides	Flavonoids	Flavonoid glycosides		36.2	0	M-H2O-H	C38H40O19	3.81748	1.60741	0.0380338	0.180059	1.13293	1.45695e+06	1.286e+06	1.39436e+06	1.55377e+06	1.49333e+06	1.38635e+06	1.37239e+06	1.3719e+06	1.218e+06	1.18171e+06
4.15_263.1393m/z	263.139	4.1478	pos	Feruloyl-2-hydroxyputrescine	HMDB0033465	Phenylpropanoids and polyketides	Cinnamic acids and derivatives	Hydroxycinnamic acids and derivatives		43	22.2	M+H-H2O	C14H20N2O4	0.869484	1.59614	8.31235e-08	-1.74129	0.299102	53112	177572	55269.5	52990.3	54026.7	50161.6	168918	174021	187153	180195
11.01_342.1465n	365.136	11.0149	pos	Austrobailignan 7	HMDB0030859	Lignans, neolignans and related compounds	Furanoid lignans	Tetrahydrofuran lignans		40.2	6.02	M+H, M+Na, M+NH4	C20H22O5	-0.517204	1.58459	0.0417609	3.36521	10.3045	186937	18141.2	73827.5	311809	74110.9	287999	22061.9	18944.8	16574.9	14983.2
4.01_277.1228m/z	277.123	4.0069	neg	exo-Dehydrochalepin	HMDB0039071	Phenylpropanoids and polyketides	Coumarins and derivatives	Furanocoumarins		37.8	0.444	M-H2O-H	C19H20O3	-2.11186	1.5765	7.68576e-05	-1.15969	0.447608	101225	226146	93184.8	113118	92256.1	106340	211396	199905	248822	244461
0.72_446.1865m/z	446.187	0.715617	pos	b-D-Xylopyranosyl-(1->4)-a-L-rhamnopyranosyl-(1->2)-L-arabinose	HMDB0041221	Organic oxygen compounds	Organooxygen compounds	Carbohydrates and carbohydrate conjugates		39.4	8.65	M+NH4	C16H28O13	-0.729016	1.57518	0.000376436	-0.809829	0.570449	169711	297504	162368	168521	181185	166769	291864	345038	261303	291809
1.05_527.1584m/z	527.158	1.04625	pos	beta-D-Galactopyranosyl-(1->3)-beta-D-galactopyranosyl-(1->6)-D-galactose	HMDB0038853	Organic oxygen compounds	Organooxygen compounds	Carbohydrates and carbohydrate conjugates		47.5	47.8	M+Na	C18H32O16	0.293843	1.57334	1.71249e-05	-2.40135	0.189288	28697.1	151605	23780.7	33880.5	29720.4	27406.6	167495	167547	143435	127944
5.28_379.1662m/z	379.166	5.27835	neg	Di-4-coumaroylputrescine	HMDB0033466	Phenylpropanoids and polyketides	Cinnamic acids and derivatives	Hydroxycinnamic acids and derivatives		55.5	82.4	M-H	C22H24N2O4	-0.390244	1.56866	1.85431e-06	0.762237	1.69612	294601	173691	302453	292673	288548	294729	182800	184728	167367	159869
0.73_162.1124m/z	162.112	0.7327	pos	L-Carnitine	HMDB0000062	Organic nitrogen compounds	Organonitrogen compounds	Quaternary ammonium salts	C00318	44.7	28.2	M+H	C7H15NO3	-0.32306	1.56375	5.81326e-05	0.59825	1.51388	361196	238590	358109	337703	368442	380529	238724	256779	242072	216784
5.83_417.1176m/z	417.118	5.8333	pos	Daidzin	HMDB0033991	Phenylpropanoids and polyketides	Isoflavonoids	Isoflavonoid O-glycosides	C10216	53	70.2	M+H	C21H20O9	-0.937089	1.54215	1.11244e-05	7.23971	151.137	118518	784.18	137856	99535	128450	108232	1101.05	580.432	640.459	814.778
8.50_385.1292m/z	385.129	8.50308	neg	Licocoumarone	HMDB0038755	Phenylpropanoids and polyketides	2-arylbenzofuran flavonoids	Unclassified		47.1	39	M+FA-H	C20H20O5	-0.111332	1.52982	4.30473e-06	8.38444	334.169	115721	346.294	104923	128136	101140	128684	680.444	704.729	0.00128576	0.00128576
8.07_331.0810m/z	331.081	8.0688	pos	3,7-Dimethylquercetin	HMDB0029263	Phenylpropanoids and polyketides	Flavonoids	O-methylated flavonoids	C01265	53.1	70.8	M+H	C17H14O7	-0.828495	1.52621	6.9523e-06	11.1249	2233.15	115056	51.5217	123675	103223	133143	100182	0.00128576	206.083	0.00128576	0.00128576
10.78_313.0716m/z	313.072	10.7771	neg	2',7-Dihydroxy-4',5'-dimethoxyisoflavone	HMDB0041644	Phenylpropanoids and polyketides	Isoflavonoids	O-methylated isoflavonoids		39	0.892	M-H	C17H14O6	-0.414351	1.52476	1.21343e-05	4.44082	21.7181	120699	5557.54	131877	101017	138593	111309	6551.66	6571.94	4058.54	5048
9.24_399.1810m/z	399.181	9.23602	neg	Diosbulbin H	HMDB0036781	Lipids and lipid-like molecules	Prenol lipids	Terpene lactones		43	21.5	M-H2O-H	C23H30O7	-0.769194	1.52443	1.58025e-06	8.66586	406.148	114452	281.8	107774	122582	100647	126807	435.212	691.984	0.00128576	0.00128576
9.09_384.1207n	385.128	9.08708	pos	Calebin A	HMDB0040134	Phenylpropanoids and polyketides	Cinnamic acids and derivatives	Hydroxycinnamic acids and derivatives		39.4	2.41	M+H, M+NH4, M+K	C21H20O7	-0.510243	1.52124	1.12962e-07	9.3309	643.991	113253	175.861	111554	124628	106986	109842	399.309	304.131	0.00128576	0.00128576
3.64_430.1613n	429.154	3.6398	neg	Cubebinone	HMDB0033259	Lignans, neolignans and related compounds	Furanoid lignans	Tetrahydrofuran lignans		38.6	0	M-H, 2M-H	C23H26O8	-3.32559	1.51909	0.020221	0.306793	1.23695	743505	601077	755140	778752	753707	686422	685655	653693	513633	551327
4.01_887.2691n	888.275	4.0079	pos	Pelargonidin 3-(4'''-p-coumarylrutinoside)-5-glucoside	44256669	Unclassified	Unclassified	Unclassified		36.4	0	M+H-H2O, M+H	C42H47O21+	9.17455	1.5134	6.09744e-06	-3.27229	0.103501	13054.3	126128	12594.9	11359.1	14215	14048.4	133872	143870	113237	113532
1.89_115.0393m/z	115.039	1.88977	pos	(S)-2-Acetolactate	HMDB0006855	Organic acids and derivatives	Keto acids and derivatives	Short-chain keto acids and derivatives	C06010	40.9	9.24	M+H-H2O	C5H8O4	2.2982	1.51043	7.01734e-06	-1.74987	0.297329	47674.6	160343	46560.6	49598.9	45643.7	48895.4	146066	148159	176848	170300
8.27_323.2094n	324.217	8.26535	pos	N-Jasmonoylisoleucine	HMDB0029391	Organic acids and derivatives	Carboxylic acids and derivatives	Amino acids, peptides, and analogues	C18699	51	60.6	M+H, M+Na	C18H29NO4	-0.725917	1.50746	1.75606e-07	0.590107	1.50536	330963	219857	338639	325762	333450	326000	225113	217736	223357	213220
8.75_371.1133m/z	371.113	8.75458	neg	Moracin O	HMDB0040313	Phenylpropanoids and polyketides	2-arylbenzofuran flavonoids	Unclassified		52.2	65.4	M+FA-H	C19H18O5	-0.901458	1.50497	0.00109973	7.84306	229.613	119981	522.537	153657	92905.8	156124	77238.7	995.318	1094.83	0.00128576	0.00128576
5.39_499.0857m/z	499.086	5.38528	neg	6''-Malonylgenistin	HMDB0029529	Phenylpropanoids and polyketides	Isoflavonoids	Isoflavonoid O-glycosides	C16192	54.6	83.1	M-H2O-H	C24H22O13	-4.80762	1.49754	6.35324e-11	7.40874	169.923	109881	646.652	107274	110327	109653	112271	1324.99	1079.52	0.00128576	182.103
6.26_348.0723m/z	348.072	6.25542	neg	Zeanoside B	HMDB0038844	Organic oxygen compounds	Organooxygen compounds	Carbohydrates and carbohydrate conjugates		38.9	0	M-H2O-H	C16H17NO9	-0.471199	1.49518	4.46821e-07	4.77156	27.3138	113592	4158.79	115521	114413	123098	101338	6697.24	6872.32	1579.69	1485.92
13.25_208.1463n	226.18	13.2539	pos	3-Hydroxy-beta-ionone	HMDB0036821	Lipids and lipid-like molecules	Prenol lipids	Sesquiterpenoids		49.1	48	M+H, M+NH4, M+H-H2O	C13H20O2	-0.119568	1.4865	1.01437e-05	4.78456	27.561	113501	4118.17	116352	90162	120621	126869	2766.44	4527.64	4071.86	5106.74
9.71_721.3649m/z	721.365	9.71058	neg	(S)-Nerolidol 3-O-[a-L-rhamnopyranosyl-(1->4)-a-L-rhamnopyranosyl-(1->6)-b-D-glucopyranoside]	HMDB0040846	Organic oxygen compounds	Organooxygen compounds	Carbohydrates and carbohydrate conjugates		57.3	88.1	M+FA-H	C33H56O14	-0.397408	1.48553	0.000686204	-1.19609	0.436458	89123.1	204196	85556.2	89536.3	89850.7	91549.1	243481	224511	182437	166356
8.97_386.1364n	409.126	8.96682	pos	(7'R*,8'S*)-Methyl 4,7'-epoxy-3,8'-bilign-7-ene-4',9'-dihydroxy-3',5-dimethoxy-9-oate	HMDB0034629	Phenylpropanoids and polyketides	2-arylbenzofuran flavonoids	Unclassified		39.1	0.815	M+H-H2O, M+Na	C21H22O7	-0.483361	1.48485	5.79421e-06	26.3341	8.45967e+07	108771	0.00128576	118343	95953.9	124177	96610.2	0.00128576	0.00128576	0.00128576	0.00128576
4.68_463.0883m/z	463.088	4.67973	neg	3'-(2''-Galloylglucosyl)-phloroacetophenone	HMDB0040622	Organic oxygen compounds	Organooxygen compounds	Carbohydrates and carbohydrate conjugates		58.1	92.8	M-H2O-H	C21H22O13	0.307325	1.47479	0.00038803	-0.498166	0.708006	271586	383592	288250	257709	272648	267735	350146	372116	416764	395342
9.48_385.1292m/z	385.129	9.48163	neg	5-Deoxykievitone	HMDB0034214	Phenylpropanoids and polyketides	Isoflavonoids	Isoflavans	C10418	53.4	70.3	M+FA-H	C20H20O5	-0.2332	1.46118	3.33386e-07	8.5481	374.312	104793	279.962	99785.8	112393	95168.3	111825	542.267	577.578	0.00128576	0.00128576
2.96_231.1349m/z	231.135	2.9638	neg	3-[(3-Methylbutyl)nitrosoamino]-2-butanone	HMDB0033553	Organic nitrogen compounds	Organonitrogen compounds	Organic nitroso compounds		48.5	43.9	M+FA-H	C9H18N2O2	-0.658606	1.44102	1.02378e-08	-3.66767	0.0786902	8649.85	109923	9077.73	8763.39	8489.12	8269.14	104543	107738	112452	114957
9.92_220.1827n	221.19	9.9211	pos	alpha-Cyperol	HMDB0035026	Lipids and lipid-like molecules	Prenol lipids	Sesquiterpenoids	C16945	49.9	52.6	M+H-H2O, M+H	C15H24O	-0.0458035	1.42359	8.32953e-06	1.55893	2.94636	151663	51474.9	156718	134667	164564	150703	48702	44605.2	60334	52258.3
4.89_520.1942n	565.193	4.89303	neg	(7'S,8'S)-4,7'-Epoxy-3,8'-bilign-7-ene-3',5-dimethoxy-4',9,9'-triol 4'-glucoside	HMDB0040636	Phenylpropanoids and polyketides	2-arylbenzofuran flavonoids	Unclassified		39.6	0	M-H, M+FA-H	C26H32O11	-0.506871	1.41881	4.82654e-07	0.554097	1.46825	309159	210563	316010	298304	312915	309407	213341	209994	213796	205121
10.18_272.0684n	273.076	10.1819	pos	(2R,3R)-3,4',7-Trihydroxyflavanone	HMDB0037254	Phenylpropanoids and polyketides	Flavonoids	Flavans	C09751	48.8	48.7	M+H-H2O, M+H	C15H12O5	-0.346243	1.41588	1.33707e-06	8.15095	284.238	98737.1	347.376	100085	90931.5	112799	91132.5	828.297	561.203	0.00128576	0.00128576
0.63_102.0554m/z	102.055	0.628217	pos	L-Threonine	HMDB0000167	Organic acids and derivatives	Carboxylic acids and derivatives	Amino acids, peptides, and analogues	C00188	51.7	68.2	M+H-H2O	C4H9NO3	3.77285	1.40745	0.000615726	-0.305081	0.809397	437367	540361	452066	400463	440725	456213	517274	557159	553647	533366
9.44_367.1184m/z	367.118	9.44053	neg	Glabrene	HMDB0029530	Phenylpropanoids and polyketides	Isoflavonoids	Pyranoisoflavonoids		50.6	56.9	M+FA-H	C20H18O4	-0.917127	1.40513	0.000432009	7.75193	215.557	102329	474.719	127919	72652.9	126896	81849.3	812.783	1086.09	0.00128576	0.00128576
4.25_180.0422n	179.035	4.24513	neg	Caffeic acid	HMDB0001964	Phenylpropanoids and polyketides	Cinnamic acids and derivatives	Hydroxycinnamic acids and derivatives	C01481	57.4	88.8	M-H, 2M-H	C9H8O4	-0.213121	1.4021	0.000710952	1.54666	2.9214	155886	53360.1	186344	127607	180977	128618	54801.6	56374.9	50835.1	51429
5.06_477.1024m/z	477.102	5.05638	pos	Diosmetin 7-O-beta-D-glucuronopyranoside	HMDB0037452	Phenylpropanoids and polyketides	Flavonoids	Flavonoid glycosides		52.9	69.4	M+H	C22H20O12	-0.645601	1.40154	0.00014949	-1.40241	0.378295	60583	160147	58731.2	58337.1	66558.4	58705.1	142344	137912	181454	178880
5.83_461.1090m/z	461.109	5.83102	neg	Pulmatin	HMDB0030671	Benzenoids	Anthracenes	Anthraquinones		55.8	80.4	M+FA-H	C21H20O9	0.128882	1.39977	1.05918e-06	6.45682	87.8409	97221.2	1106.79	104446	87195.9	106503	90739.9	1456.19	1306.51	990.178	674.265
8.71_257.0817m/z	257.082	8.71247	neg	Lactucin	HMDB0035814	Organoheterocyclic compounds	Lactones	Gamma butyrolactones	C09489	54.1	75.2	M-H2O-H	C15H16O5	-0.971266	1.39603	0.00604593	7.68876	206.323	110660	536.343	151338	64447.8	161723	65130.9	762.428	876.388	288.09	218.467
0.76_346.0556m/z	346.056	0.755233	neg	N-Acetylglucosamine 6-phosphate	HMDB0002817	Organic oxygen compounds	Organooxygen compounds	Carbohydrates and carbohydrate conjugates		42.6	21.1	M+FA-H	C8H16NO9P	3.7521	1.39338	3.41279e-06	1.64071	3.1182	140687	45118.1	142203	148757	138860	132930	52465.8	54475.1	37570.1	35961.2
12.38_406.2714n	429.261	12.3805	pos	Annocherin A	HMDB0033399	Phenylpropanoids and polyketides	Flavonoids	Flavonoid glycosides		41.9	17.7	M+NH4, M+Na, M+H	C24H38O5	-1.2024	1.38857	3.34913e-05	3.38304	10.4327	106373	10196.1	130770	95578.9	106215	92927.1	10660.2	7325.3	8865.58	13933.5
4.31_625.1407m/z	625.141	4.3098	neg	Myricetin 3-neohesperidoside	HMDB0038287	Phenylpropanoids and polyketides	Flavonoids	Flavonoid glycosides		54	71.7	M-H	C27H30O17	-0.45464	1.38821	1.2708e-06	0.233405	1.17561	633261	538668	644085	630621	631733	626607	535153	534754	536740	548025
7.78_385.1293m/z	385.129	7.77908	neg	Glyceollidin II	HMDB0037916	Phenylpropanoids and polyketides	Isoflavonoids	Furanoisoflavonoids		46.3	34.7	M+FA-H	C20H20O5	0.0992489	1.38697	0.000717548	8.43795	346.797	100633	290.177	128168	74785.5	127829	71748.2	470.776	689.931	0.00128576	0.00128576
10.73_318.2402m/z	318.24	10.7278	pos	Trilobinol	HMDB0038702	Lipids and lipid-like molecules	Prenol lipids	Diterpenoids		36.9	0	M+NH4	C20H28O2	-8.4914	1.37294	0.0166777	0.478339	1.39314	406202	291574	384872	425856	380770	433311	252792	224031	326663	362808
1.08_337.0940n	320.091	1.08162	pos	gamma-Glutamylcysteinylserine	HMDB0039733	Organic acids and derivatives	Carboxylic acids and derivatives	Amino acids, peptides, and analogues		44.7	32.8	M+H-H2O, M+H	C11H19N3O7S	-1.17861	1.37054	0.0128053	2.50091	5.66043	135683	23970.5	84892.6	196420	77411.3	184010	26027.4	35084.4	16529.7	18240.6
4.89_304.0583n	303.051	4.89303	neg	2-(3,4-dihydroxyphenyl)-3,5,7-trihydroxy-3,4-dihydro-2H-1-benzopyran-4-one	HMDB0125371	Phenylpropanoids and polyketides	Flavonoids	Flavans		39.3	0	M-H, M+FA-H, M-H2O-H	C15H12O7	-0.0407711	1.36658	0.000159013	1.16412	2.24096	171061	76333.9	180024	152756	187496	163969	91862.7	89092.5	62035	62345.5
4.44_479.0828m/z	479.083	4.43872	neg	Myricetin 3-galactoside	HMDB0034358	Phenylpropanoids and polyketides	Flavonoids	Flavonoid glycosides		54.8	78.3	M-H	C21H20O13	-0.743024	1.36357	2.23362e-05	-3.31154	0.100722	10353.1	102789	10118.7	8322.36	11554	11417.5	95050.6	85510.3	109923	120671
3.70_227.1038m/z	227.104	3.7022	neg	gamma-Glutamylvaline	HMDB0011172	Organic acids and derivatives	Carboxylic acids and derivatives	Amino acids, peptides, and analogues		52.3	63.6	M-H2O-H	C10H18N2O5	0.304182	1.36096	3.07209e-05	-3.63656	0.0804059	8072.64	100399	8665.88	8056.48	8129.84	7438.38	82944.2	89768.8	116321	112561
10.61_276.1230m/z	276.123	10.6083	pos	Demethylvestitol	HMDB0033986	Phenylpropanoids and polyketides	Isoflavonoids	Isoflavans		37	0.955	M+NH4	C15H14O4	-0.289647	1.36066	2.38353e-05	-0.556815	0.679801	195612	287748	196269	187722	209782	188672	302619	292227	276117	280029
1.66_313.0906m/z	313.091	1.65935	neg	Leonuriside A	HMDB0031721	Organic oxygen compounds	Organooxygen compounds	Carbohydrates and carbohydrate conjugates		37.6	0	M-H2O-H	C14H20O9	-6.75019	1.35393	8.13843e-05	-3.36248	0.0972281	9935.54	102188	11193.7	9060.86	10400.2	9087.43	117168	120974	85730.5	84878.8
0.79_164.0471n	182.081	0.78795	pos	2-Hydroxycinnamic acid	HMDB0002641	Phenylpropanoids and polyketides	Cinnamic acids and derivatives	Hydroxycinnamic acids and derivatives	C01772	48.4	46	M+H-H2O, M+NH4, M+H	C9H8O3	-1.40066	1.35133	0.00309217	-0.139826	0.907629	981799	1.08172e+06	975415	970744	984232	996805	1.08476e+06	1.06834e+06	1.135e+06	1.03879e+06
11.81_351.2539m/z	351.254	11.8134	neg	Sagittariol	HMDB0036835	Lipids and lipid-like molecules	Prenol lipids	Diterpenoids		52.9	67.8	M+FA-H	C20H34O2	-0.60196	1.35118	1.84689e-06	9.75591	864.61	89847	103.916	82096.7	90244.8	83310.5	103736	215.225	200.438	0.00128576	0.00128576
10.14_283.1328m/z	283.133	10.142	pos	Myrigalon B	HMDB0037246	Phenylpropanoids and polyketides	Linear 1,3-diarylpropanoids	Chalcones and dihydrochalcones		40	4.46	M+H-H2O	C18H20O4	-0.162412	1.35031	1.77218e-05	10.5347	1483.45	90582.8	61.0623	97562.4	71664.2	105868	87237	0.00128576	244.246	0.00128576	0.00128576
10.61_369.1330m/z	369.133	10.6083	pos	Lepidine F	HMDB0033094	Benzenoids	Benzene and substituted derivatives	Biphenyls and derivatives		38.6	0	M+Na	C20H18N4O2	2.36334	1.33957	9.2684e-09	8.69212	413.609	87730.9	212.111	84205.3	91413.8	84386.8	90917.8	556.14	292.301	0.00128576	0.00128576
1.06_549.1672m/z	549.167	1.06495	neg	Galactotriose	HMDB0029922	Organic oxygen compounds	Organooxygen compounds	Carbohydrates and carbohydrate conjugates	C07283	42.9	21.7	M+FA-H	C18H32O16	-0.133847	1.33938	1.41889e-07	-2.946	0.129768	13075.7	100763	9706	15079.1	15983.5	11534.4	99431.7	93487.6	105796	104334
10.10_205.1951m/z	205.195	10.1019	pos	Rosifoliol	527256	Lipids and lipid-like molecules	Prenol lipids	Sesquiterpenoids		52.6	66.6	M+H-H2O	C15H26O	0.210195	1.31706	1.4556e-06	1.48553	2.80021	132488	47313.7	143711	129530	131637	125075	44893	42600.5	51878.6	49882.5
14.72_312.3258m/z	312.326	14.7223	pos	Phytal	HMDB0035654	Lipids and lipid-like molecules	Prenol lipids	Diterpenoids		47.5	42.9	M+NH4	C20H38O	-1.13545	1.31498	0.00810888	1.32422	2.50397	165572	66124.1	205441	133710	191057	132082	24337.9	69008.7	63553.9	107596
1.18_414.1185m/z	414.119	1.17752	neg	Ochratoxin B	HMDB0029401	Phenylpropanoids and polyketides	Ochratoxins and related substances	Unclassified		37.8	0.131	M+FA-H	C20H19NO6	-2.44042	1.31416	3.29077e-07	-4.14766	0.0564194	5054.74	89592.2	5216.27	4842.12	5125.47	5035.09	88424.3	96446.8	93156.8	80340.8
9.01_376.0670m/z	376.067	9.00687	neg	Gonyautoxin II	HMDB0033507	Phenylpropanoids and polyketides	Saxitoxins, gonyautoxins, and derivatives	Unclassified	C16856	38.1	1.31	M-H2O-H	C10H17N7O8S	-2.66684	1.31375	1.41284e-08	5.01833	32.4091	86863.2	2680.21	90448.1	85726.9	87099.7	84178.2	4856.1	5864.74	0.00128576	0.00128576
2.56_189.1234m/z	189.123	2.56213	pos	N6-Acetyl-L-lysine	HMDB0000206	Organic acids and derivatives	Carboxylic acids and derivatives	Amino acids, peptides, and analogues	C02727	47.6	41	M+H	C8H16N2O3	0.398004	1.30926	2.6273e-09	-2.85836	0.137894	13364.2	96916.1	14270.7	13555	12753.7	12877.3	97919.2	95838.8	100475	93431.6
0.61_355.1546m/z	355.155	0.610317	pos	Hydroxymyricanone	HMDB0041416	Phenylpropanoids and polyketides	Diarylheptanoids	Cyclic diarylheptanoids		40.1	17.8	M+H-H2O	C21H24O6	1.70683	1.30372	0.00165455	-7.54743	0.00534559	488.219	91331.1	0.00128576	0.00128576	1952.87	0.00128576	56428.2	69519.2	113228	126148
8.47_255.0663m/z	255.066	8.46508	neg	11-Methoxynoryangonin	HMDB0030754	Phenylpropanoids and polyketides	Kavalactones	Unclassified		50.3	54.8	M-H2O-H	C15H14O5	-0.097855	1.30078	0.0456756	6.39164	83.9605	116247	1384.55	193428	37594.3	197328	36638.9	2217.86	1853.08	830.342	636.912
9.88_369.1341m/z	369.134	9.87737	neg	(R)-Glabridin	HMDB0034188	Phenylpropanoids and polyketides	Isoflavonoids	Pyranoisoflavonoids	C10421	50.4	56	M+FA-H	C20H20O4	-0.716399	1.2857	0.000232792	8.59838	387.587	84536.6	218.11	107359	68320	98461	64005.8	506.071	366.366	0.00128576	0.00128576
1.21_397.1716m/z	397.172	1.21402	pos	1-(3-Methylbutanoyl)-6-apiosylglucose	HMDB0039953	Lipids and lipid-like molecules	Fatty Acyls	Fatty acyl glycosides		38.1	0	M+H	C16H28O11	2.8613	1.28341	2.24079e-07	-2.66654	0.157504	15060.8	95622	14493.9	15094.9	16224	14430.5	104645	94475.7	92483.5	90883.9
6.96_334.1047m/z	334.105	6.95637	pos	Norisodomesticine	HMDB0033361	Alkaloids and derivatives	Aporphines	Unclassified		39.1	0	M+Na	C18H17NO4	-0.852155	1.27976	3.56568e-07	6.95204	123.815	80815.7	652.715	89857	75229.9	81819.2	76356.8	1319.84	1291.01	0.00128576	0.00128576
10.19_695.2129m/z	695.213	10.1905	neg	5-Hydroxy-7,3',4'-trimethoxy-8-methylisoflavone 5-neohesperidoside	HMDB0030627	Phenylpropanoids and polyketides	Isoflavonoids	Isoflavonoid O-glycosides		40.9	21.3	M+FA-H	C31H38O15	-9.76431	1.27873	0.000683258	10.1652	1148.24	85316.2	74.3017	113865	53114	98701.7	75584.3	0.00128576	0.00128576	0.00128576	297.203
5.10_446.1206n	447.128	5.09693	pos	Prunitrin	HMDB0034149	Phenylpropanoids and polyketides	Isoflavonoids	Isoflavonoid O-glycosides		42.8	21.4	M+H, M+Na, M+H-H2O	C22H22O10	-1.66083	1.27265	0.00125127	1.93249	3.81713	116322	30473.6	118426	113306	117194	116361	4500.85	4888.04	60832.1	51673.3
10.77_442.3807n	425.377	10.7682	pos	Coflodiol	HMDB0034664	Lipids and lipid-like molecules	Prenol lipids	Triterpenoids		52.5	69.3	M+H-H2O, M+H	C30H50O2	-0.778354	1.26667	0.000726831	0.525217	1.43915	274668	190854	280237	253535	278672	286226	216339	197538	163263	186276
10.50_297.1465m/z	297.146	10.503	pos	[6]-Dehydroshogaol	HMDB0033090	Phenylpropanoids and polyketides	Cinnamic acids and derivatives	Hydroxycinnamic acids and derivatives		37.4	1.43	M+Na	C17H22O3	1.31047	1.26565	5.16097e-05	-0.957484	0.514954	85173.2	165400	79520.4	84454.2	88553	88165.1	150399	164582	186311	160307
0.81_103.0036m/z	103.004	0.807767	neg	Tartronate semialdehyde	HMDB0006938	Organic oxygen compounds	Organooxygen compounds	Carbohydrates and carbohydrate conjugates	C01146	45.8	31.8	M-H	C3H4O4	-1.1887	1.26452	0.00533069	-0.290108	0.817841	402818	492538	393384	415612	370074	432201	537501	493466	475209	463976
6.76_212.1413n	195.138	6.75697	pos	Cucurbic acid	HMDB0029388	Lipids and lipid-like molecules	Fatty Acyls	Lineolic acids and derivatives		50.1	54	M+H-H2O, M+H	C12H20O3	0.187258	1.26418	2.45466e-05	-0.843158	0.557422	100172	179706	102588	95124.7	107279	95695.9	197380	179136	172155	170152
0.74_549.1670m/z	549.167	0.738183	neg	Gentiotriose	HMDB0029910	Organic oxygen compounds	Organooxygen compounds	Carbohydrates and carbohydrate conjugates		48.1	49.3	M+FA-H	C18H32O16	-0.430657	1.26172	3.92646e-05	-1.19146	0.437859	61940.2	141462	61097.8	60979.1	68986.8	56697.2	161935	136461	136866	130584
1.25_137.0457m/z	137.046	1.25245	pos	Hypoxanthine	HMDB0000157	Organoheterocyclic compounds	Imidazopyrimidines	Purines and purine derivatives	C00262	41	12.4	M+H	C5H4N4O	-0.60455	1.24075	3.25345e-07	1.9428	3.84451	101797	26478.5	101659	102966	107252	95310.6	29381.5	30096.7	23116.2	23319.4
11.30_368.2794m/z	368.279	11.3027	pos	(S)-[10]-Gingerol	HMDB0033616	Benzenoids	Phenols	Methoxyphenols	C17496	41.1	9.32	M+NH4	C21H34O4	-0.414376	1.23838	3.94975e-05	2.32907	5.0248	95644.1	19034.4	83633.2	114456	85705.6	98781.9	21447	19238	17805.6	17647
4.21_231.1128m/z	231.113	4.20802	pos	(1xi,3xi)-1,2,3,4-Tetrahydro-1-methyl-beta-carboline-3-carboxylic acid	HMDB0037942	Alkaloids and derivatives	Harmala alkaloids	Unclassified		51.2	63.7	M+H	C13H14N2O2	0.116783	1.23062	0.000827728	-2.77287	0.146313	13601.4	92961	14593.4	13090.4	14219.7	12502.1	113116	117085	72991.8	68650.6
6.55_559.1361m/z	559.136	6.55312	pos	Mulberrofuran S	HMDB0033985	Phenylpropanoids and polyketides	2-arylbenzofuran flavonoids	Unclassified		37.8	0.748	M+H-H2O	C34H24O9	-4.55694	1.22746	0.000151366	25.8235	5.93801e+07	76348.4	0.00128576	90421.3	64227.9	93204.3	57540.1	0.00128576	0.00128576	0.00128576	0.00128576
11.59_399.1801m/z	399.18	11.5914	pos	10-Hydroxymelleolide	HMDB0038786	Lipids and lipid-like molecules	Prenol lipids	Sesquiterpenoids		52.6	68	M+H-H2O	C23H28O7	-0.197435	1.21588	8.98351e-07	9.38916	670.532	72632.8	108.321	70938.6	64239.7	73993.5	81359.4	433.281	0.00128576	0.00128576	0.00128576
9.73_367.2487m/z	367.249	9.73033	neg	Mangalkanyl glucoside	HMDB0036015	Organic oxygen compounds	Organooxygen compounds	Carbohydrates and carbohydrate conjugates		44.3	27.9	M-H2O-H	C21H38O6	-0.68035	1.21186	7.66511e-07	11.4848	2866.05	72026.8	25.1311	64730.5	79459.6	67896.5	76020.7	100.52	0.00128576	0.00128576	0.00128576
8.96_385.1292m/z	385.129	8.96403	neg	Selinone	HMDB0037585	Phenylpropanoids and polyketides	Flavonoids	Flavans		52.8	70.2	M+FA-H	C20H20O5	-0.280362	1.21104	5.2916e-11	7.57532	190.72	71805.9	376.498	73244.8	72223.1	71622.1	70133.5	807.092	698.898	0.00128576	0.00128576
5.53_137.0243m/z	137.024	5.53462	neg	Salicylic acid	HMDB0001895	Benzenoids	Benzene and substituted derivatives	Benzoic acids and derivatives	C00805	55.9	83.7	M-H	C7H6O3	-1.19381	1.20616	1.15274e-07	2.10631	4.30588	92611.3	21508.1	88488.8	97243.5	88404.2	96308.6	22978.6	21432.8	20739.3	20881.6
5.70_349.0023m/z	349.002	5.70482	neg	Apigenin 7-sulfate	HMDB0037851	Phenylpropanoids and polyketides	Flavonoids	Flavones		54.1	79.8	M-H	C15H10O8S	-0.311589	1.20436	8.73925e-06	0.930655	1.90614	150832	79129.4	151366	147936	159738	144287	70113.1	75902.4	81851	88651.1
4.67_957.4717m/z	957.472	4.67327	pos	Achyranthoside C	HMDB0031024	Lipids and lipid-like molecules	Prenol lipids	Terpene glycosides		38.1	0.813	M+H	C47H72O20	2.87753	1.20409	2.67718e-06	-1.78324	0.290531	29214.7	100556	27301.9	29789.3	31339.6	28427.9	107259	108013	94519.8	92433.1
5.63_300.0629n	301.07	5.62537	pos	Tectorigenin	HMDB0042024	Phenylpropanoids and polyketides	Isoflavonoids	Isoflav-2-enes	C10534	39.7	4.08	M+H, M+Na	C16H12O6	-1.53548	1.20381	3.52273e-05	6.58775	96.1854	73061.8	759.593	85423.8	60241.3	83520.2	63062	259.149	427.968	1293.42	1057.83
10.41_269.0807m/z	269.081	10.4059	pos	Vestitone	HMDB0031620	Phenylpropanoids and polyketides	Isoflavonoids	O-methylated isoflavonoids		46.1	35.6	M+H-H2O	C16H14O5	-0.398638	1.19976	4.80503e-05	25.739	5.60019e+07	72004.9	0.00128576	81742.8	59288.5	86178.7	60809.5	0.00128576	0.00128576	0.00128576	0.00128576
8.13_391.1188m/z	391.119	8.13127	neg	(5a,6a,8a,11a)-8-Hydroxy-2-oxo-1(10),3-guaiadien-12,6-olide-15-al 8-(4-hydroxyphenylacetate)	HMDB0039048	Benzenoids	Phenols	1-hydroxy-2-unsubstituted benzenoids		49.2	51.7	M-H2O-H	C23H22O7	0.241549	1.19665	6.8098e-06	5.58375	47.9597	72222.4	1505.9	82331.3	60133.2	77158.1	69267	2823.51	2383.73	414.792	401.558
8.69_381.0591m/z	381.059	8.69245	neg	Theaflagallin	HMDB0033287	Organoheterocyclic compounds	Benzopyrans	1-benzopyrans		37.1	0	M-H2O-H	C20H16O9	-6.33509	1.1941	2.37972e-09	7.82852	227.31	69804.3	307.089	68926	66902.1	72770.8	70618.4	573.375	654.976	0.00128576	0.00128576
3.57_352.1503m/z	352.15	3.573	pos	Cappariloside A	HMDB0034937	Organic oxygen compounds	Organooxygen compounds	Carbohydrates and carbohydrate conjugates		44.7	28.8	M+NH4	C16H18N2O6	-0.143659	1.18349	1.15954e-06	-5.23009	0.0266432	1881.26	70609.5	2528.61	1370.61	1911.38	1714.44	64897.5	64567	78646.8	74326.6
5.68_329.1030m/z	329.103	5.68378	neg	Cerasinone	HMDB0037315	Phenylpropanoids and polyketides	Flavonoids	O-methylated flavonoids		45	29.2	M-H	C18H18O6	-0.192714	1.1779	0.000186864	8.74086	427.82	70700.2	165.257	85882.1	54374.8	85536.9	57007.1	318.721	241.938	100.368	0.00128576
0.68_198.1238m/z	198.124	0.680633	pos	L-Histidine trimethylbetaine	HMDB0029422	Organic acids and derivatives	Carboxylic acids and derivatives	Amino acids, peptides, and analogues	C05575	43.2	22.3	M+H	C9H15N3O2	0.255096	1.1769	3.03089e-06	1.22184	2.33244	119384	51184	123453	114137	112669	127275	53336.5	51429.9	54629	45340.7
1.60_423.1093m/z	423.109	1.60073	pos	Glucocleomin	HMDB0034045	Organic oxygen compounds	Organooxygen compounds	Carbohydrates and carbohydrate conjugates		38.5	7.46	M+NH4	C12H23NO10S2	-2.19906	1.17459	7.11265e-06	2.08776	4.25088	89077	20955	90800.1	87195.2	99745.9	78567	19809.9	18103	19676.7	26230.3
3.71_264.1474n	265.155	3.70793	pos	Subaphylline	HMDB0033463	Phenylpropanoids and polyketides	Cinnamic acids and derivatives	Hydroxycinnamic acids and derivatives	C10497	55.5	81.3	M+H, M+K, M+Na	C14H20N2O3	-0.123158	1.17324	4.71301e-05	1.00945	2.01314	136804	67955.8	129411	145360	141472	130974	82403.4	69515.7	61725	58179
5.02_592.1426n	593.15	5.01567	pos	Daidzin 4'-O-glucuronide	HMDB0041719	Phenylpropanoids and polyketides	Stilbenes	Unclassified		42.4	19.2	M+H, M+Na	C27H28O15	-0.42705	1.17265	0.00678748	-0.217416	0.860104	481822	560190	501600	466950	501213	457523	591699	578242	549289	521529
0.74_615.1540m/z	615.154	0.738183	neg	Flazine	HMDB0033459	Alkaloids and derivatives	Harmala alkaloids	Unclassified		38.1	0	2M-H	C17H12N2O4	3.06844	1.17253	0.000950383	-3.60492	0.0821886	6470.33	78725.4	2611.71	16356.3	0.00128576	6913.33	61234	57170.3	102882	93615.6
7.77_780.4656n	781.473	7.77357	pos	Saponin G	HMDB0040469	Lignans, neolignans and related compounds	Lignan glycosides	Unclassified		44.7	31.7	M+H, M+Na	C42H68O13	-0.458501	1.17014	2.43064e-06	1.86536	3.64358	92802.6	25470.2	86323.6	102518	91021.9	91346.5	30722.3	25409.3	23090.3	22658.7
1.33_380.1121m/z	380.112	1.32667	pos	Niazimicin A	HMDB0031944	Organic oxygen compounds	Organooxygen compounds	Carbohydrates and carbohydrate conjugates		37.6	6.08	M+Na	C16H23NO6S	-4.94367	1.16961	0.000163944	8.36852	330.504	69613.3	210.628	76183.5	55239.9	90172.4	56857.2	0.00128576	842.507	0.00128576	0.00128576
3.35_365.1054m/z	365.105	3.34885	pos	Glucinol	HMDB0039237	Organic oxygen compounds	Organooxygen compounds	Carbohydrates and carbohydrate conjugates		42.8	21.7	M+Na	C12H22O11	-0.118437	1.16098	6.01837e-08	1.94283	3.8446	88960.4	23139.1	86080.1	85993.1	92379.9	91388.2	24425.7	24628.6	23735.5	19766.4
0.76_207.0144m/z	207.014	0.755233	neg	Hydroxypyruvic acid	HMDB0001352	Organic acids and derivatives	Hydroxy acids and derivatives	Beta hydroxy acids and derivatives	C00168	42.4	13.9	2M-H	C3H4O4	-0.961681	1.15986	0.000659652	0.731688	1.66058	176111	106054	169867	184664	169659	180252	121401	125864	88839.1	88110.8
10.59_471.3476m/z	471.348	10.5888	neg	7-Oxostigmasterol	HMDB0030015	Lipids and lipid-like molecules	Steroids and steroid derivatives	Stigmastanes and derivatives		39.1	0	M+FA-H	C29H46O2	-0.920852	1.15195	8.06435e-09	25.5849	5.03278e+07	64709.3	0.00128576	63567.4	68721.5	61991.5	64556.9	0.00128576	0.00128576	0.00128576	0.00128576
0.79_264.1012m/z	264.101	0.78795	pos	Dehydroanonaine	HMDB0030350	Alkaloids and derivatives	Aporphines	Unclassified		39.3	17.4	M+H	C17H13NO2	-2.81989	1.1453	4.37751e-05	-25.6045	1.96008e-08	0.00128576	65597.2	0.00128576	0.00128576	0.00128576	0.00128576	76832.9	75088.7	59536.2	50930.8
10.04_460.2693m/z	460.269	10.0426	pos	Pectachol	HMDB0039064	Phenylpropanoids and polyketides	Coumarins and derivatives	Unclassified		50.1	63.1	M+NH4	C26H34O6	-0.239826	1.14371	0.0447741	1.05269	2.0744	171449	82649.7	136290	229668	103515	216321	41644.8	67470	116070	105414
9.52_385.1279m/z	385.128	9.51822	pos	S-Adenosylhomocysteine	HMDB0000939	Nucleosides, nucleotides, and analogues	5'-deoxyribonucleosides	5'-deoxy-5'-thionucleosides	C00021	42.7	24.8	M+H	C14H20N6O5S	-2.40181	1.14239	1.47217e-06	25.5704	4.98266e+07	64064.9	0.00128576	70879.6	63277.5	67151.6	54950.9	0.00128576	0.00128576	0.00128576	0.00128576
6.97_269.0465m/z	269.047	6.96888	neg	Rheinanthrone	HMDB0039449	Benzenoids	Anthracenes	Anthracenecarboxylic acids and derivatives		49.1	52.7	M-H	C15H10O5	3.57828	1.14091	8.37326e-05	7.54172	186.331	65839	353.345	76385	52586.1	79334.2	55050.6	659.016	754.362	0.00128576	0.00128576
5.79_330.0737n	331.081	5.7903	pos	Aflatoxin G2	HMDB0030475	Phenylpropanoids and polyketides	Coumarins and derivatives	Furanocoumarins	C16754	42.5	17.9	M+H, M+Na	C17H14O7	-0.899923	1.13586	1.16968e-05	10.4086	1359.29	63922.6	47.0264	73003.5	56480.9	71528.4	54677.8	0.00128576	188.102	0.00128576	0.00128576
9.50_383.1134m/z	383.113	9.50267	neg	Moracin H	HMDB0033315	Phenylpropanoids and polyketides	2-arylbenzofuran flavonoids	Unclassified		51.4	61.3	M+FA-H	C20H18O5	-0.55781	1.13453	1.02509e-06	8.66329	405.425	63289.1	156.105	69522.3	58445.5	67917	57271.5	254.711	296.875	0.00128576	72.8351
0.79_111.0086m/z	111.009	0.790633	neg	2,3-Dihydroxy-2,4-cyclopentadien-1-one	HMDB0039437	Organic acids and derivatives	Vinylogous acids	Unclassified		42.3	15.8	M-H	C5H4O3	-1.18753	1.1298	1.51971e-08	1.88162	3.68488	85464.3	23193.2	86462.6	80981.2	87697.2	86716.2	23566.2	23395.4	23356	22455.5
10.00_382.1413n	383.149	10.0015	pos	Artocarpetin B	HMDB0033148	Phenylpropanoids and polyketides	Flavonoids	Flavones		43.3	21.6	M+H, M+Na	C22H22O6	-0.906607	1.12726	1.70972e-07	25.5258	4.83092e+07	62113.9	0.00128576	64492.7	66318.7	61867.9	55776.3	0.00128576	0.00128576	0.00128576	0.00128576
13.50_474.3343n	497.324	13.5012	pos	(3beta,17alpha,23S,24S)-17,23-Epoxy-3,24,29-trihydroxy-27-norlanost-8-en-15-one	HMDB0035144	Lipids and lipid-like molecules	Prenol lipids	Triterpenoids		38.8	0	M+NH4, M+Na	C29H46O5	-0.452134	1.12395	2.05346e-07	5.66576	50.7649	63030	1241.61	59915.5	58235.9	66474.7	67494.1	0.00128576	1221.15	1677.87	2067.41
4.64_367.0126m/z	367.013	4.63693	neg	(-)-Epigallocatechin sulfate	HMDB0012468	Phenylpropanoids and polyketides	Flavonoids	Sulfated flavonoids		52.2	67.7	M-H2O-H	C15H14O10S	-0.81476	1.12318	2.11699e-05	0.587918	1.50308	187396	124675	184238	186849	186179	192317	136471	129257	117571	115402
0.79_145.0141m/z	145.014	0.790633	neg	Oxoglutaric acid	HMDB0000208	Organic acids and derivatives	Keto acids and derivatives	Gamma-keto acids and derivatives	C00026	42.9	18.7	M-H	C5H6O5	-0.846912	1.12285	9.91749e-08	1.74887	3.36096	87707.8	26096.1	88066.9	90106.7	82214.3	90443.5	24428.4	25001.6	28092	26862.4
4.17_497.2536m/z	497.254	4.16867	pos	Glycinoeclepin C	HMDB0037036	Lipids and lipid-like molecules	Prenol lipids	Sesquiterpenoids		40.5	18.6	M+H-H2O	C29H38O8	0.485847	1.1181	4.20655e-08	-4.02263	0.0615275	4001.31	65032.8	2999.5	4938.71	4172.36	3894.66	61694.2	63928.3	69918.2	64590.6
7.20_125.0243m/z	125.024	7.19965	neg	Maltol	HMDB0030776	Organoheterocyclic compounds	Pyrans	Pyranones and derivatives	C11918	43	18	M-H	C6H6O3	-1.11554	1.11116	1.92191e-05	4.5948	24.1641	63963	2647.02	71045.2	55001.5	74244.6	55560.7	3067.07	3017.17	2267.41	2236.44
9.15_287.0913m/z	287.091	9.14962	pos	3',7-Dihydroxy-4'-methoxyisoflavanone	HMDB0029870	Phenylpropanoids and polyketides	Isoflavonoids	O-methylated isoflavonoids		47.7	42.1	M+H	C16H14O5	-0.197276	1.11088	1.72979e-05	25.5057	4.76419e+07	61255.9	0.00128576	72077.5	50367	66774.7	55804.5	0.00128576	0.00128576	0.00128576	0.00128576
0.77_291.1298m/z	291.13	0.77095	pos	N2-(3-Hydroxysuccinoyl)arginine	HMDB0032765	Organic acids and derivatives	Carboxylic acids and derivatives	Amino acids, peptides, and analogues		45.4	38.6	M+H	C10H18N4O6	-0.340272	1.10634	9.39824e-05	-1.17705	0.442254	48946.5	110675	51097.8	48343.7	51620.1	44724.4	100398	129788	105173	107341
4.07_295.1653m/z	295.165	4.06782	pos	Sinapoylputrescine	HMDB0033464	Phenylpropanoids and polyketides	Cinnamic acids and derivatives	Hydroxycinnamic acids and derivatives		44.9	29.4	M+H	C15H22N2O4	0.093965	1.10529	4.1176e-06	-2.99644	0.125309	8625.33	68832.6	8442.27	8982.81	9983.97	7092.26	77250.7	73138.8	62718.4	62222.4
9.94_341.1027m/z	341.103	9.93872	neg	7-Hydroxy-R-phenprocoumon	HMDB0060888	Phenylpropanoids and polyketides	Coumarins and derivatives	Hydroxycoumarins		42	13.9	M+FA-H	C18H16O4	-1.23481	1.09888	1.66835e-08	8.05259	265.503	59142.9	222.758	59457.9	59374	55283.1	62456.7	446.241	444.787	0.00128576	0.00128576
4.69_463.0869m/z	463.087	4.69302	pos	Quercetin-3'-glucuronide	HMDB0029213	Phenylpropanoids and polyketides	Flavonoids	Flavonoid glycosides		46.6	40.6	M+H-H2O	C21H20O13	-0.400986	1.09869	8.29344e-05	-2.57338	0.16801	12267	73013.6	11808.2	14090.3	11252.1	11917.4	59218.5	66854.8	88925	77056.1
10.73_299.0913m/z	299.091	10.7278	pos	5-hydroxy-7-methoxy-2-(4-methoxyphenyl)-4H-chromen-4-one	HMDB0132454	Phenylpropanoids and polyketides	Flavonoids	O-methylated flavonoids	C10019	52.1	65.1	M+H	C17H14O5	-0.398727	1.09845	3.13548e-05	25.4791	4.6772e+07	60137.5	0.00128576	69808.7	51035.2	69174.2	50532	0.00128576	0.00128576	0.00128576	0.00128576
4.89_358.1414n	341.138	4.89415	pos	Glicophenone	HMDB0035467	Phenylpropanoids and polyketides	Stilbenes	Unclassified		48	45.5	M+H-H2O, M+H	C20H22O6	-0.711468	1.0881	0.000402894	0.686352	1.60921	161147	100140	152932	171119	149402	171135	92169.5	119231	95033.9	94126.9
11.28_282.2558n	283.263	11.2814	pos	Elaidic acid	HMDB0000573	Lipids and lipid-like molecules	Fatty Acyls	Fatty acids and conjugates	C01712	49.3	50.6	M+H-H2O, M+H	C18H34O2	-0.124488	1.08778	0.0179638	1.70519	3.26071	104367	32007.3	112873	91273.1	114807	98512.8	10000.6	13285.1	7763.22	96980.3
8.94_355.0823m/z	355.082	8.9438	neg	5,8-Dihydroxy-3,3',4',7-tetramethoxyflavone	HMDB0030611	Phenylpropanoids and polyketides	Flavonoids	O-methylated flavonoids		46.6	39.6	M-H2O-H	C19H18O8	-0.147426	1.0841	1.32466e-05	8.01963	259.508	58461.2	225.277	68712.6	50447.8	63337.6	51346.9	564.757	336.35	0.00128576	0.00128576
6.34_318.0738n	317.066	6.34093	neg	Dihydroisorhamnetin	HMDB0037501	Phenylpropanoids and polyketides	Flavonoids	O-methylated flavonoids		47.3	40.7	M-H2O-H, M-H	C16H14O7	-0.445734	1.07878	2.2996e-05	9.03393	524.183	58020.8	110.688	48687.1	63126.8	50927.1	69342.1	163.691	279.058	0.00128576	0.00128576
0.65_174.1114n	173.104	0.649483	neg	L-Arginine	HMDB0000517	Organic acids and derivatives	Carboxylic acids and derivatives	Amino acids, peptides, and analogues	C00062	52.1	68	M-H, M+FA-H, 2M-H	C6H14N4O2	-1.36309	1.07583	0.0317558	-0.0930707	0.937525	1.12559e+06	1.2006e+06	1.09749e+06	1.16331e+06	1.09201e+06	1.14957e+06	1.24433e+06	1.22375e+06	1.16006e+06	1.17427e+06
12.38_439.3569m/z	439.357	12.3805	pos	Sandosapogenol	HMDB0031882	Lipids and lipid-like molecules	Prenol lipids	Triterpenoids		52.7	71.9	M+H-H2O	C30H48O3	-0.394365	1.07558	1.63487e-06	25.3973	4.41923e+07	56820.6	0.00128576	63470.3	50319.9	60443	53049.2	0.00128576	0.00128576	0.00128576	0.00128576
5.04_475.0880m/z	475.088	5.04315	neg	Daidzein 7-O-glucuronide	HMDB0041718	Phenylpropanoids and polyketides	Isoflavonoids	Isoflavonoid O-glycosides		51.9	61.7	M+FA-H	C21H18O10	-0.415251	1.07551	0.000573926	-1.21199	0.431672	45598.1	105631	45862.8	46118.8	41937.9	48473	90255.4	90101.4	123395	118774
1.44_422.1227m/z	422.123	1.44183	pos	Niazimin A	HMDB0038630	Organic oxygen compounds	Organooxygen compounds	Carbohydrates and carbohydrate conjugates		37.2	0.299	M+K	C18H25NO8	3.96594	1.06972	9.11943e-05	-1.2304	0.4262	42834.5	100503	44508.9	44826.5	41137.7	40864.9	107106	114561	89942.9	90403.4
9.46_117.0701m/z	117.07	9.45903	pos	trans-Cinnamyl alcohol	HMDB0029698	Phenylpropanoids and polyketides	Cinnamyl alcohols	Unclassified	C02394	49.6	51.7	M+H-H2O	C9H10O	1.51505	1.06656	8.39711e-05	6.50582	90.8757	57869.7	636.801	69848.1	47234.7	66955.4	47440.5	789.228	466.777	611.696	679.502
4.93_301.0718m/z	301.072	4.93482	neg	Dihydrodaidzein	HMDB0005760	Phenylpropanoids and polyketides	Isoflavonoids	Isoflavans		54.4	74.1	M+FA-H	C15H12O4	-4.14627e-05	1.06022	4.50424e-05	7.42042	171.305	56531.4	330.005	68028.1	46860.3	63344.7	47892.5	582.088	659.841	78.0904	0.00128576
10.67_405.1328m/z	405.133	10.6655	pos	Secoeremopetasitolide A	HMDB0041364	Lipids and lipid-like molecules	Prenol lipids	Terpene lactones		38.7	3.13	M+K	C19H26O7	4.78787	1.0586	4.69364e-06	25.3567	4.2965e+07	55242.6	0.00128576	64838.3	50486.3	56531	49114.8	0.00128576	0.00128576	0.00128576	0.00128576
6.25_241.0857m/z	241.086	6.24677	pos	Archangin	HMDB0030616	Phenylpropanoids and polyketides	Coumarins and derivatives	Furanocoumarins		53.6	71.5	M+H-H2O	C15H14O4	-0.719033	1.0555	5.07155e-07	7.14418	141.453	54942.5	388.414	59095.5	53719.6	58333.8	48620.9	842.955	588.867	121.831	0.00128576
3.85_478.1687n	477.161	3.854	neg	Kelampayoside A	HMDB0038714	Organic oxygen compounds	Organooxygen compounds	Carbohydrates and carbohydrate conjugates		43.9	23	M-H, 2M-H	C20H30O13	0.0220479	1.05476	9.2521e-05	-3.96265	0.0641393	3843.35	59921.8	4556.56	2755.04	4700	3361.78	64494.8	75017	50412	49763.5
5.43_317.0663m/z	317.066	5.42703	neg	4',5,8-Trihydroxyflavanone	HMDB0031824	Phenylpropanoids and polyketides	Flavonoids	Flavans		53.7	72.5	M+FA-H	C15H12O5	-1.24965	1.05113	2.50623e-05	1.65886	3.15767	80436.4	25473.4	89416	78143.8	85020.7	69165	28161.1	28785.5	23022.2	21924.6
3.51_341.0911m/z	341.091	3.5143	neg	Glucocaffeic acid	HMDB0034313	Organic oxygen compounds	Organooxygen compounds	Carbohydrates and carbohydrate conjugates		37.1	0.0837	M-H	C15H18O9	9.61098	1.04322	1.28488e-06	0.747465	1.67884	132097	78683.4	138133	127739	132908	129608	78811.2	83034.9	75594.1	77293.6
9.31_402.2040n	425.194	9.31498	pos	Armillyl orsellinate	HMDB0035774	Lipids and lipid-like molecules	Prenol lipids	Sesquiterpenoids		42	18.8	M+H, M+Na	C23H30O6	-0.478434	1.04248	5.52081e-10	25.2956	4.11832e+07	52951.6	0.00128576	50930.5	53269.2	53045.1	54561.5	0.00128576	0.00128576	0.00128576	0.00128576
5.96_726.4414m/z	726.441	5.95613	pos	Hovenidulcioside B2	HMDB0041549	Lipids and lipid-like molecules	Prenol lipids	Terpene glycosides		38.5	0	M+NH4	C38H60O12	-1.24655	1.04028	0.02477	2.38933	5.23915	84436.2	16116.4	45883.9	123364	46831.2	121666	29068.9	25834.6	3370.72	6191.41
5.51_324.1430m/z	324.143	5.50575	pos	trans-O-Methylgrandmarin	HMDB0039031	Phenylpropanoids and polyketides	Coumarins and derivatives	Pyranocoumarins		36	0	M+NH4	C16H18O6	-3.94217	1.03554	0.000173561	1.11915	2.17219	101014	46503.1	110839	90735.9	93043.4	109436	54040.6	52199.9	37365.1	42406.6
13.52_446.3394n	469.329	13.5219	pos	Secasterone	HMDB0040999	Lipids and lipid-like molecules	Steroids and steroid derivatives	Ergostane steroids		39.9	8.45	M+NH4, M+Na	C28H46O4	-0.490399	1.0336	9.3025e-06	7.17072	144.08	53221.2	369.387	42578.5	56608.8	53222.8	60474.5	0.00128576	0.00128576	564.081	913.463
9.64_300.2896m/z	300.29	9.6386	pos	Sphingosine	HMDB0000252	Organic nitrogen compounds	Organonitrogen compounds	Amines	C00319	56.1	84.3	M+H	C18H37NO2	-0.315115	1.0335	3.19121e-06	-1.71651	0.304283	23000.5	75589.2	20390.3	22364.6	22515	26732.1	69116.9	83178.9	74388.9	75672
0.63_161.1285m/z	161.128	0.628217	pos	L-2-Amino-3-methylenehexanoic acid	HMDB0030410	Organic acids and derivatives	Carboxylic acids and derivatives	Amino acids, peptides, and analogues		50.4	54.7	M+NH4	C7H13NO2	0.291181	1.03161	6.76002e-05	-0.493042	0.710525	131240	184708	137173	132954	130911	123921	187774	196236	180697	174125
5.87_285.0405m/z	285.04	5.87408	neg	Dantron	HMDB0029752	Benzenoids	Anthracenes	Anthraquinones	C10312	46.8	36	M+FA-H	C14H8O4	-0.0356833	1.02936	0.00207113	1.34623	2.54246	94010.9	36976.3	110459	78065.3	114839	72679.8	36426.7	39957.4	31655.2	39865.9
5.11_301.0715m/z	301.072	5.10808	neg	4',5,7-Trihydroxy-3-methoxyflavanone	HMDB0040560	Phenylpropanoids and polyketides	Flavonoids	O-methylated flavonoids		50.5	57	M-H	C16H14O6	-0.803378	1.02787	6.24911e-05	7.15347	142.367	53357.3	374.787	62045.4	44928.3	63198.6	43257	746.455	752.689	0.00128576	0.00128576
1.08_437.1335m/z	437.134	1.08162	pos	Cyanidin 3-xyloside	HMDB0037984	Phenylpropanoids and polyketides	Flavonoids	Flavonoid glycosides		39.2	12.3	M+NH4	C20H19O10+	4.47712	1.02415	1.08534e-05	1.59594	3.02291	77554	25655.4	82363	83204.1	75874	68774.9	27289.3	29037.2	26252.7	20042.4
4.55_524.2042m/z	524.204	4.55377	pos	Chitotriose	HMDB0006578	Organic oxygen compounds	Organooxygen compounds	Carbohydrates and carbohydrate conjugates		40.6	28.9	M+Na	C18H35N3O13	-4.05491	1.02394	3.77506e-06	1.74292	3.34713	73651.6	22004.4	74104.8	66271.2	79789.6	74440.7	25519.9	23052.5	17713.9	21731.4
10.97_390.2403n	391.248	10.9732	pos	Annoglabasin A	HMDB0033400	Lipids and lipid-like molecules	Prenol lipids	Diterpenoids		38.4	1.26	M+H, M+Na	C23H34O5	-0.923091	1.01931	9.87803e-08	25.2347	3.9483e+07	50765.6	0.00128576	48302.8	47443.1	54519.3	52797	0.00128576	0.00128576	0.00128576	0.00128576
10.77_177.1638m/z	177.164	10.7682	pos	5-Isopropyl-2-(2-methylpropyl)-2-cyclohexen-1-one	HMDB0038216	Lipids and lipid-like molecules	Prenol lipids	Monoterpenoids		48.7	46.1	M+H-H2O	C13H22O	0.135883	1.01613	0.000184471	0.519673	1.43363	173530	121042	184388	162115	181437	166180	127171	125338	112398	119262
9.17_252.1725n	253.18	9.17047	pos	Zedoarondiol	HMDB0036448	Lipids and lipid-like molecules	Prenol lipids	Sesquiterpenoids		44.6	31.7	M+H, M+Na	C15H24O3	-0.355264	1.01069	7.76721e-05	1.17694	2.26096	92056.2	40715.5	95788.4	88524.9	98823.5	85087.9	48540.3	47946.2	34429.7	31945.7
4.01_290.0792n	289.072	4.0069	neg	Catechin	HMDB0002780	Phenylpropanoids and polyketides	Flavonoids	Flavans	C06562	56.8	87.2	M-H, 2M-H, M+FA-H	C15H14O6	0.506318	1.00759	0.00569037	-0.512235	0.701136	134343	191608	153090	114873	156063	113347	178991	180648	199448	207344
5.64_299.0559m/z	299.056	5.6406	neg	Phomarin	HMDB0030874	Benzenoids	Anthracenes	Anthraquinones		44.5	25.6	M+FA-H	C15H10O4	-0.87542	1.00608	1.35857e-05	7.12204	139.299	50519.5	362.67	55793.7	43613.7	58602.5	44067.9	524.573	425.229	246.482	254.397
7.14_827.4794m/z	827.479	7.13657	neg	Ginsenoside La	HMDB0039647	Lipids and lipid-like molecules	Prenol lipids	Triterpenoids		58.2	92.6	M+FA-H	C42H70O13	-0.591508	1.00493	1.84535e-06	1.6952	3.23822	71799.7	22172.6	65085.3	71633.5	74099.3	76380.5	24837.2	23566.2	21092.5	19194.4
8.84_525.1187m/z	525.119	8.83892	neg	Ascorbalamic acid	HMDB0029944	Organic acids and derivatives	Carboxylic acids and derivatives	Amino acids, peptides, and analogues		36.2	0	2M-H	C9H13NO8	-4.2058	1.00435	3.07306e-05	25.221	3.91094e+07	50285.2	0.00128576	55487.5	37878.8	58147.2	49627.3	0.00128576	0.00128576	0.00128576	0.00128576
1.93_321.1114m/z	321.111	1.92842	pos	Licoagroaurone	HMDB0035373	Phenylpropanoids and polyketides	Aurone flavonoids	Unclassified		38.8	8.68	M+H-H2O	C20H18O5	-2.06328	1.00381	0.0164665	-9.72127	0.00118469	72.5443	61234.8	0.00128576	0.00128576	290.173	0.00128576	92039	94631.1	30572.5	27696.5
2.41_237.1461m/z	237.146	2.40618	pos	Cis-zeatin	HMDB0012204	Unclassified	Unclassified	Unclassified		39.3	0	M+NH4	C10H13N5O	1.25466	1.00182	0.000866239	-0.109518	0.926898	668057	720745	660430	673565	674402	663829	723001	738076	722002	699898
1.08_111.0087m/z	111.009	1.08298	neg	2-Furoic acid	HMDB0000617	Organoheterocyclic compounds	Furans	Furoic acid and derivatives	C01546	43.6	21.1	M-H	C5H4O3	-0.951982	1.0012	3.46498e-05	1.37798	2.59904	81299.7	31280.6	77802.4	84095.2	78040.6	85260.7	37932.1	38776.3	22782.9	25631.2
