# Supplementary material for: Multi-omics research on common allergens during the ripening of pollen and poplar flocs of Populus deltoides
Source: Front Plant Sci. 2023 Jun 16;14:1136613. doi: 10.3389/fpls.2023.1136613 (PMC10313134; doi:10.3389/fpls.2023.1136613)
Supplement: Supplementary file 3 [file Table_3.xlsx]

## Sheet: ripe catkins_Unripe catkins
ID	m/z	Retention time (min)	Ion mode	Metabolites	Compound ID	Super Class	Class	Sub Class	kegg	Score	Fragmentation Score	Adducts	Formula	Mass Error (ppm)	VIP	P-value	log2(FC)	FC	average(ripe catkin)	average(Unripe catkin)	ripe-catkin1	ripe-catkin2	ripe-catkin3	ripe-catkin4	Unripe-catkin1	Unripe-catkin2	Unripe-catkin3	Unripe-catkin4
10.73_318.2403m/z	318.24	10.7276	pos	Sugiol	HMDB0036564	Lipids and lipid-like molecules	Prenol lipids	Diterpenoids		37	0	M+NH4	C20H28O2	-8.16154	4.29213	3.91579e-05	-0.259842	0.83518	588300	704399	603125	594953	592291	562828	722000	705132	696538	693926
1.19_180.9899m/z	180.99	1.19023	pos	5-Hydroxymaltol	HMDB0032988	Organoheterocyclic compounds	Pyrans	Pyranones and derivatives		39.9	4.53	M+K	C6H6O4	1.24966	2.17319	0.000103876	-0.256629	0.837042	153824	183771	155900	157186	154108	148103	187572	177581	188721	181212
0.84_166.0864m/z	166.086	0.842783	pos	Cinnamic acid	HMDB0000567	Phenylpropanoids and polyketides	Cinnamic acids and derivatives	Cinnamic acids	C10438	42.8	21.7	M+NH4	C9H8O2	0.812978	1.07115	0.000114464	0.327431	1.25478	36368.5	28984	37902.6	36415.1	35023.3	36133.1	30518.5	27890.5	29240.2	28287
4.36_183.0661m/z	183.066	4.35748	neg	3-Ethyl-1,2-benzenediol	HMDB0040177	Benzenoids	Phenols	Benzenediols	C06728	48	43.3	M+FA-H	C8H10O2	-1.14959	1.1063	0.000659024	-0.18145	0.881816	59878.7	67903.9	59074.6	62364.5	58906.9	59169	70248.6	65749.9	68091.8	67525.4
3.09_239.1618m/z	239.162	3.0895	pos	Dihydrozeatin	HMDB0012215	Organoheterocyclic compounds	Imidazopyrimidines	Purines and purine derivatives	C02029	40.5	6.45	M+NH4	C10H15N5O	1.33846	3.84786	0.00101175	-0.388916	0.763703	325662	426424	321950	329408	322163	329125	474111	410087	424210	397290
0.74_126.0319n	127.039	0.735517	pos	5-Hydroxymethyl-2-furancarboxaldehyde	HMDB0034355	Organic oxygen compounds	Organooxygen compounds	Carbonyl compounds	C11101	45.5	32	M+H, M+NH4, M+H-H2O	C6H6O3	1.74719	4.1501	0.00125748	-0.256161	0.837313	590368	705074	609715	608521	533998	609236	717466	709810	708665	684353
1.14_329.0853m/z	329.085	1.1421	neg	Ethiin	HMDB0037057	Organic acids and derivatives	Carboxylic acids and derivatives	Amino acids, peptides, and analogues		38.3	0	2M-H	C5H11NO3S	1.88341	1.97369	0.00168843	-0.351406	0.78382	95926.4	122383	104069	96276.5	90570.4	92789.5	131374	126442	116930	114787
0.68_155.0426m/z	155.043	0.682733	pos	Ureidopropionic acid	HMDB0000026	Organic acids and derivatives	Organic carbonic acids and derivatives	Ureas	C02642	38.9	0	M+Na	C4H8N2O3	-0.520284	2.17763	0.0018933	-0.790672	0.578075	44313.6	76657.1	49923.4	39144	35345.8	52841.1	82139.5	63238.3	80642.5	80608.2
4.70_467.1671m/z	467.167	4.70153	neg	Coixinden B	HMDB0040906	Benzenoids	Indenes and isoindenes	Unclassified	C17917	36.8	0	2M-H	C13H14O4	-8.72388	1.80507	0.00222637	0.485065	1.39965	78954.9	56410.5	76213.9	84374.8	72157.4	83073.7	53521	63319.8	48464.7	60336.6
7.28_446.1216n	469.11	7.28117	pos	3,6,7-Trihydroxy-4'-methoxyflavone 7-rhamnoside	HMDB0041455	Phenylpropanoids and polyketides	Flavonoids	Flavonoid glycosides		46.8	42.2	M+H, M+Na, M+H-H2O	C22H22O10	0.711034	1.48464	0.00275765	-0.428768	0.742896	42919.4	57773.1	47069.3	44150.5	40174.6	40283.2	52253.3	62877.1	61237.5	54724.5
4.55_186.1135m/z	186.114	4.55172	neg	Physoperuvine	HMDB0030338	Alkaloids and derivatives	Tropane alkaloids	Unclassified	C10864	41	14	M+FA-H	C8H15NO	-0.231324	1.27489	0.0029667	-0.127331	0.915524	120924	132082	117883	126044	119099	120670	135539	128668	131041	133080
0.71_781.2017m/z	781.202	0.710583	neg	6'''-O-Sinapoylsaponarin	HMDB0035005	Phenylpropanoids and polyketides	Flavonoids	Flavonoid glycosides		36.3	0	M-H2O-H	C38H40O19	3.98513	8.43339	0.00366259	-0.265326	0.832011	2.40892e+06	2.8953e+06	2.39497e+06	2.6132e+06	2.36203e+06	2.26548e+06	2.96186e+06	2.74902e+06	3.0766e+06	2.79372e+06
12.91_270.2791m/z	270.279	12.9126	pos	Capsiamide	HMDB0040940	Organic acids and derivatives	Carboxylic acids and derivatives	Carboxylic acid derivatives	C17515	42.7	15.9	M+H	C17H35NO	-0.0571655	2.46981	0.00412669	-0.162061	0.893747	359284	401997	371976	363852	338829	362478	420487	398992	393194	395315
1.25_255.0062m/z	255.006	1.24963	pos	Bergapten	HMDB0030637	Phenylpropanoids and polyketides	Coumarins and derivatives	Furanocoumarins	C01557	38.4	1.82	M+K	C12H8O4	3.62637	2.1843	0.00432704	0.48451	1.39911	120737	86295.4	139823	115437	114938	112749	87539	87772.6	74412.9	95457
0.68_132.0534n	131.046	0.675217	neg	L-Asparagine	HMDB0000168	Organic acids and derivatives	Carboxylic acids and derivatives	Amino acids, peptides, and analogues	C00152	49	47.3	M-H, 2M-H, M-H2O-H	C4H8N2O3	-0.909867	11.6359	0.00488863	-0.581306	0.668358	1.91739e+06	2.86881e+06	1.89013e+06	2.03431e+06	1.7299e+06	2.01523e+06	3.14719e+06	2.2874e+06	2.85184e+06	3.18881e+06
0.79_396.2381m/z	396.238	0.787433	pos	Eremopetasitenin D1	HMDB0032773	Lipids and lipid-like molecules	Prenol lipids	Terpene lactones		38.6	0	M+NH4	C21H30O6	0.00521646	1.5326	0.00489601	-0.856057	0.55246	20844	37729.5	18900.7	22438.3	17496.1	24541	45543.1	35915.9	28879.8	40579
1.14_312.0952m/z	312.095	1.1421	neg	Adenosine	HMDB0000050	Nucleosides, nucleotides, and analogues	Purine nucleosides	Unclassified	C00212	51.2	59.8	M+FA-H	C10H13N5O4	0.762482	2.96012	0.00583654	-0.544912	0.685433	139056	202873	151048	117991	137619	149564	211917	179749	236239	183586
0.68_236.0887m/z	236.089	0.675217	neg	4-Hydroxycitrulline	HMDB0029384	Organic acids and derivatives	Carboxylic acids and derivatives	Amino acids, peptides, and analogues		39	0	M+FA-H	C6H13N3O4	-0.812134	1.33602	0.0060644	-0.962751	0.513078	12815.7	24978	15295.1	18815.8	6357.06	10794.8	23054.6	24411.7	24174.2	28271.7
2.97_231.1350m/z	231.135	2.9663	neg	3-[(3-Methylbutyl)nitrosoamino]-2-butanone	HMDB0033553	Organic nitrogen compounds	Organonitrogen compounds	Organic nitroso compounds		47.8	41.4	M+FA-H	C9H18N2O2	-0.399087	1.07624	0.00614166	0.650201	1.56939	22297.3	14207.6	19433.5	21019.3	26362	22374.3	15838.8	13422.6	10953.9	16615.3
0.72_432.1710m/z	432.171	0.718517	pos	a-L-Arabinofuranosyl-(1->3)-[a-L-arabinofuranosyl-(1r5)]-L-arabinose	HMDB0041223	Organic oxygen compounds	Organooxygen compounds	Carbohydrates and carbohydrate conjugates		55.4	79.4	M+NH4	C15H26O13	-0.387301	12.0343	0.00687371	-0.888976	0.539997	1.22846e+06	2.27493e+06	1.35323e+06	1.18604e+06	934390	1.44017e+06	2.15113e+06	2.15821e+06	2.94395e+06	1.84643e+06
4.96_445.0777m/z	445.078	4.9605	neg	apigenin-7-O-glucuronide	5319484	Organic acids and derivatives	Carboxylic acids and derivatives	Amino acids, peptides, and analogues		56.4	86.1	M-H	C21H18O11	0.119133	1.45699	0.0069604	-1.58397	0.333563	7617.64	22837.2	9640.89	4408.89	2395.13	14025.7	18911.2	17379.8	27718.1	27339.6
0.80_116.0716m/z	116.072	0.79885	neg	Betaine	HMDB0000043	Organic acids and derivatives	Carboxylic acids and derivatives	Amino acids, peptides, and analogues	C00719	38.8	1.5	M-H	C5H11NO2	-1.17931	1.78214	0.00723811	-0.586062	0.666159	44846.2	67320.7	46645.8	51365	43066.3	38308	75168.9	59591.3	58079.6	76442.8
4.02_294.1317n	293.124	4.01508	neg	Ethyl (S)-3-hydroxybutyrate glucoside	HMDB0031693	Lipids and lipid-like molecules	Fatty Acyls	Fatty acyl glycosides		52.7	66.4	M-H, 2M-H	C12H22O8	0.851288	2.55813	0.00738216	-0.364771	0.776592	159375	205224	172181	155245	148862	161213	188485	191320	207055	234036
1.39_162.0529n	145.05	1.38568	pos	D-1,5-Anhydrofructose	HMDB0041561	Organoheterocyclic compounds	Oxanes	Unclassified		41.6	11.3	M+H-H2O, M+Na	C6H10O5	0.518927	3.9573	0.00748216	-0.24012	0.846675	610516	721075	630291	633725	552745	625301	729013	701529	680123	773634
0.72_300.1288m/z	300.129	0.718517	pos	Xylobiose	HMDB0029894	Organic oxygen compounds	Organooxygen compounds	Carbohydrates and carbohydrate conjugates	C01630	37.5	0	M+NH4	C10H18O9	-0.313025	1.2253	0.00756424	-0.948889	0.518031	12079.8	23318.8	11483.9	10769.1	9338.32	16728	29883.4	18729.8	22341	22320.8
9.11_309.2424m/z	309.242	9.11342	pos	Obtusilactone A	HMDB0030960	Organoheterocyclic compounds	Tetrahydrofurans	Unclassified		38.9	0	M+H	C19H32O3	-0.0753134	1.08381	0.00781024	-0.772434	0.585429	12413	21203.2	11850.8	9401.19	13062.6	15337.4	24253.6	15785.7	21861.3	22912.2
6.56_577.1352m/z	577.135	6.56362	neg	Terniflorin	HMDB0037347	Phenylpropanoids and polyketides	Flavonoids	Flavonoid glycosides		53.9	73	M-H	C30H26O12	0.154863	1.47943	0.00784136	1.04558	2.06419	30067.3	14566.2	24376.3	24666.4	39195.1	32031.6	10896.1	15423.3	12719	19226.2
1.25_118.0265n	117.019	1.24507	neg	Succinic acid	HMDB0000254	Organic acids and derivatives	Carboxylic acids and derivatives	Dicarboxylic acids and derivatives	C00042	45.4	28.7	M-H, 2M-H, M-H2O-H	C4H6O4	-0.886336	5.82192	0.00872427	0.509302	1.42336	848736	596290	892738	822854	872850	806500	613487	553027	459604	759040
4.23_327.0521m/z	327.052	4.22883	neg	Aflatoxin B1 diol	HMDB0060430	Phenylpropanoids and polyketides	Coumarins and derivatives	Furanocoumarins	C19588	47.9	49	M-H2O-H	C17H14O8	3.21261	1.20074	0.00938712	0.489232	1.4037	35816.1	25515.5	38529.2	29546.3	40976.1	34212.8	25938.7	28062.6	25268	22792.7
4.97_447.0920m/z	447.092	4.96868	pos	Genistein 4'-O-glucuronide	HMDB0041737	Phenylpropanoids and polyketides	Isoflavonoids	Isoflavonoid O-glycosides		44.8	26.7	M+H	C21H18O11	-0.320347	1.65973	0.00944137	-1.65141	0.318329	9344.99	29356.4	13580.8	4833.1	2033.99	16932	22339.5	22629.9	37317.1	35139
1.54_276.1556m/z	276.156	1.54415	pos	gamma-L-Glutamyl-L-pipecolic acid	HMDB0038614	Organic acids and derivatives	Carboxylic acids and derivatives	Amino acids, peptides, and analogues		42	16.2	M+NH4	C11H18N2O5	0.685922	1.05555	0.00999303	0.554642	1.4688	25752.1	17532.7	23352.2	27475.1	30010.3	22170.9	18582.7	19326.9	13774.9	18446.4
1.23_421.1829m/z	421.183	1.23083	pos	Cinncassiol E	HMDB0036857	Lipids and lipid-like molecules	Prenol lipids	Sesquiterpenoids		38.8	1.4	M+Na	C20H30O8	-0.913504	1.32357	0.0100906	0.535118	1.44906	42578	29383.2	51276.3	39420.4	40396.3	39219.3	27298	35522.3	27948.3	26764.2
0.80_162.0584m/z	162.058	0.804417	pos	S-Allylcysteine	HMDB0034323	Organic acids and derivatives	Carboxylic acids and derivatives	Amino acids, peptides, and analogues	C16759	37.5	0	M+H	C6H11NO2S	0.67326	1.02756	0.010141	-2.5151	0.174936	1657.29	9473.69	1414.21	4180.73	323.942	710.275	12765.2	6801.32	12798.2	5530.07
4.59_475.1820m/z	475.182	4.5933	neg	Kanokoside A	HMDB0035635	Organic acids and derivatives	Carboxylic acids and derivatives	Amino acids, peptides, and analogues	C09993	53.5	70.7	M-H	C21H32O12	-0.184018	1.47665	0.0103881	0.505527	1.41964	56290.7	39651.3	52938.8	62908.7	59249.5	50065.7	30826.4	47015.6	42644.3	38118.9
3.88_328.1159n	351.105	3.87987	pos	Dihydromelilotoside	HMDB0038334	Organic oxygen compounds	Organooxygen compounds	Carbohydrates and carbohydrate conjugates		45.7	31.9	M+Na, M+K, M+NH4	C15H20O8	0.117503	3.25175	0.0105121	-0.594057	0.662478	154013	232481	186451	139186	124063	166353	242003	211335	274159	202425
1.09_384.1877m/z	384.188	1.09063	pos	Dihydrozeatin-9-N-glucoside	HMDB0012213	Organic oxygen compounds	Organooxygen compounds	Carbohydrates and carbohydrate conjugates		38.2	0	M+H	C16H25N5O6	-0.111455	1.02564	0.0107542	0.904105	1.87138	16685.7	8916.25	13281.7	17720.9	22099.9	13640.3	8501.09	9534.43	7661.08	9968.4
6.58_578.1424n	579.15	6.58137	pos	2''-O-p-Coumaroylvitexin	HMDB0037471	Phenylpropanoids and polyketides	Flavonoids	Flavonoid glycosides		48.5	53.9	M+H, M+Na	C30H26O12	-0.0772272	1.13282	0.0109603	1.15292	2.22364	16759.6	7537.04	12754	13300.4	23018.8	17965.3	5001.13	8628.46	7998.2	8520.35
4.49_429.1520m/z	429.152	4.4861	pos	Osmanthuside A	HMDB0038748	Phenylpropanoids and polyketides	Cinnamic acids and derivatives	Hydroxycinnamic acids and derivatives		37.3	0	M+H-H2O	C23H26O9	-5.26522	2.02564	0.0110478	1.07821	2.11141	57559.3	27261	42451.8	64620.7	73222.4	49942.4	25411.6	37620	15572.8	30439.7
0.78_174.0162n	219.014	0.780483	neg	Dehydroascorbic acid	HMDB0001264	Organoheterocyclic compounds	Lactones	Gamma butyrolactones	C05422	44.7	31.9	M-H, M+FA-H	C6H6O6	-1.23598	1.53384	0.0111476	-0.267812	0.830578	87429.3	105263	86050.7	84277	84696.9	94692.6	107145	95012.1	115618	103278
7.24_353.2117m/z	353.212	7.24017	pos	(4E,9a)-9-(3-Methyl-2E-pentenoyloxy)-4,10(14)-oplopadien-3-one	HMDB0034632	Lipids and lipid-like molecules	Prenol lipids	Sesquiterpenoids		36.5	0	M+Na	C21H30O3	8.9914	1.00912	0.0112129	-1.30783	0.403928	5139.32	12723.3	4512.37	6719.1	5593.63	3732.18	11076.3	18702.2	10502.1	10612.8
0.70_120.0657m/z	120.066	0.7015	pos	L-Threonine	HMDB0000167	Organic acids and derivatives	Carboxylic acids and derivatives	Amino acids, peptides, and analogues	C00188	52.7	66.1	M+H	C4H9NO3	1.49606	5.66209	0.0113843	-0.227029	0.854393	1.3388e+06	1.56696e+06	1.35263e+06	1.42473e+06	1.33134e+06	1.24651e+06	1.55079e+06	1.4432e+06	1.57896e+06	1.69489e+06
12.75_379.1581m/z	379.158	12.7527	neg	6-Deoxy-gamma-mangostin	HMDB0038552	Organoheterocyclic compounds	Benzopyrans	1-benzopyrans		37.9	0	M-H	C23H24O5	7.96401	3.25459	0.0114251	0.889724	1.85282	172155	92914.9	149216	168086	226812	144504	59225.7	104163	100995	107276
0.69_111.0086m/z	111.009	0.69275	neg	2,3-Dihydroxy-2,4-cyclopentadien-1-one	HMDB0039437	Organic acids and derivatives	Vinylogous acids	Unclassified		41.9	15.1	M-H	C5H4O3	-1.39665	1.20256	0.0114901	-0.486527	0.713741	27315.8	38271.2	32885.9	23924.2	23319.7	29133.4	41167.7	38647	40878	32392.3
1.07_324.0360n	305.018	1.0651	neg	Uridine 5'-monophosphate	HMDB0000288	Nucleosides, nucleotides, and analogues	Pyrimidine nucleotides	Pyrimidine ribonucleotides	C00105	49.2	49.4	M-H2O-H, M-H	C9H13N2O9P	0.353159	1.98047	0.0118916	0.346024	1.27105	135662	106732	142486	117264	153488	129411	101326	105899	110040	109664
3.97_341.0876m/z	341.088	3.97273	neg	Glucocaffeic acid	HMDB0034313	Organic oxygen compounds	Organooxygen compounds	Carbohydrates and carbohydrate conjugates		45.1	31.4	M-H	C15H18O9	-0.569451	1.04398	0.0119404	-1.48609	0.356979	4458.74	12490.2	5198.74	3303.2	3255.23	6077.8	10786.4	7214.3	16151.3	15808.8
0.56_146.1652m/z	146.165	0.557367	pos	Spermidine	HMDB0001257	Organic nitrogen compounds	Organonitrogen compounds	Amines	C00315	38.3	0	M+H	C7H19N3	0.218985	1.29776	0.0125353	1.38098	2.60444	19763.5	7588.38	15015.6	16439.6	18064.2	29534.8	8361.94	5794.8	6179.98	10016.8
6.10_388.1521n	411.141	6.09568	pos	8-Hydroxy-4'-methoxypinoresinol	HMDB0033284	Lignans, neolignans and related compounds	Furanoid lignans	Unclassified		48.8	52.9	M+H, M+Na	C21H24O7	-0.388204	1.13912	0.0125955	1.48417	2.79755	14903.7	5327.42	9310.3	15193.2	20442.7	14668.7	3495.68	7834.05	2065.97	7913.96
12.12_339.2152m/z	339.215	12.1206	neg	Sterebin D	HMDB0036832	Lipids and lipid-like molecules	Prenol lipids	Sesquiterpenoids		37.1	0	M+FA-H	C18H30O3	-8.64957	1.33822	0.0127217	-0.523415	0.695723	31086.7	44682.5	32136.5	31294.7	26757.4	34158.1	50603.5	45164.8	34579.2	48382.7
4.40_224.1050n	225.112	4.40037	pos	Acoramone	HMDB0032663	Benzenoids	Benzene and substituted derivatives	Phenylpropanes		41.7	13.6	M+H, M+Na	C12H16O4	0.498337	1.0972	0.0127224	0.94287	1.92235	18339	9539.87	17698.7	14513.4	24838.9	16304.9	8249.41	12751.9	8962.58	8195.59
3.41_346.1264n	369.116	3.41165	pos	Aucubin	HMDB0036562	Lipids and lipid-like molecules	Prenol lipids	Terpene glycosides	C09771	41.9	12.7	M+NH4, M+Na	C15H22O9	0.120177	2.66428	0.0128694	0.49862	1.41286	189378	134039	181358	223813	170821	181520	117220	164788	123673	130474
4.96_432.1056n	431.098	4.9605	neg	6-Hydroxydaidzein 4'-glucoside	HMDB0029577	Phenylpropanoids and polyketides	Isoflavonoids	Isoflavonoid O-glycosides		57.5	88.8	M-H, 2M-H	C21H20O10	-0.154941	3.92927	0.0133032	-0.994904	0.501769	119869	238894	130513	124258	81209	143498	276373	244584	286460	148157
3.17_260.1373n	261.145	3.16915	pos	gamma-Glutamylleucine	HMDB0011171	Organic acids and derivatives	Carboxylic acids and derivatives	Amino acids, peptides, and analogues		47.1	38.9	M+H, M+Na, M+H-H2O	C11H20N2O5	0.257147	3.25696	0.0135468	0.493778	1.40813	273161	193989	269351	262573	319656	241062	220477	194482	149546	211449
1.08_192.0269n	191.02	1.08268	neg	Citric acid	HMDB0000094	Organic acids and derivatives	Carboxylic acids and derivatives	Tricarboxylic acids and derivatives	C00158	50.7	54.6	M-H2O-H, M-H	C6H8O7	-0.530854	7.77522	0.014008	0.316451	1.24526	2.35257e+06	1.88922e+06	2.24579e+06	2.543e+06	2.37409e+06	2.2474e+06	1.92124e+06	2.10328e+06	1.56252e+06	1.96982e+06
3.87_395.0959m/z	395.096	3.86567	neg	Ethyl gallate	HMDB0033836	Benzenoids	Benzene and substituted derivatives	Benzoic acids and derivatives		37.3	0	2M-H	C9H10O5	-6.19209	1.55045	0.0140171	-0.580639	0.668667	36642.7	54799.5	42788.5	36000.4	29635.4	38146.3	56591.7	50669.8	66557	45379.6
0.77_233.1132m/z	233.113	0.769833	pos	L-N-(3-Carboxypropyl)glutamine	HMDB0029393	Organic acids and derivatives	Carboxylic acids and derivatives	Amino acids, peptides, and analogues		43.2	17.9	M+H	C9H16N2O5	0.0781869	2.535	0.0145246	0.818912	1.76408	114242	64760.4	86748.4	137985	137789	94446.6	62960.7	62240.3	55536.4	78304.2
0.98_295.0306m/z	295.031	0.98195	neg	(E)-2-Propenyl [3-(2-propenylthio)-2-propenyl] sulfate	HMDB0039464	Organic acids and derivatives	Organic sulfuric acids and derivatives	Sulfuric acid esters		36.6	0.773	M+FA-H	C9H14O4S2	-3.82544	1.72444	0.0153238	-0.715089	0.609167	34488.9	56616.4	34843.9	34471.3	32537	36103.3	48431.9	42811.3	70448.7	64773.6
14.69_848.4826m/z	848.483	14.6904	neg	alpha-Solanine	HMDB0034202	Phenylpropanoids and polyketides	Depsides and depsidones	Unclassified	C20046	37.2	0	M-H2O-H	C45H73NO15	2.77203	1.09928	0.015372	-0.440595	0.736831	25494.8	34600.6	27199.4	22352	26099.6	26328.1	30475.1	30289.6	40140.8	37496.8
0.63_161.1285m/z	161.129	0.63	pos	L-2-Amino-3-methylenehexanoic acid	HMDB0030410	Organic acids and derivatives	Carboxylic acids and derivatives	Amino acids, peptides, and analogues		48	43	M+NH4	C7H13NO2	0.405314	1.6781	0.0161807	-0.590254	0.664226	43461.4	65431.7	41338.5	39318.5	57495.2	35693.6	70516.9	53806	74487.4	62916.6
0.69_87.0087m/z	87.0087	0.69275	neg	Glyceric acid	HMDB0000139	Organic oxygen compounds	Organooxygen compounds	Carbohydrates and carbohydrate conjugates	C00258	39.4	0	M-H2O-H	C3H6O4	-0.645438	1.71958	0.0165476	-0.443973	0.735107	64332.1	87513.9	76642.7	55605.6	54845.3	70234.8	94197.9	88542.8	92784.3	74530.6
1.15_205.1184m/z	205.118	1.14907	pos	N6-Acetyl-5S-hydroxy-L-lysine	HMDB0033891	Organic acids and derivatives	Carboxylic acids and derivatives	Amino acids, peptides, and analogues		45.2	34.8	M+H	C8H16N2O4	0.5038	1.29192	0.0169028	0.709365	1.63508	34013.3	20802.1	30595	40061.8	39146.8	26249.6	19920.1	23028.4	14953.4	25306.6
4.97_433.1128m/z	433.113	4.96868	pos	Cosmosiin	HMDB0037340	Phenylpropanoids and polyketides	Flavonoids	Flavonoid glycosides	C04608	54.5	75.5	M+H	C21H20O10	-0.23607	3.61704	0.0187039	-1.12589	0.458218	86782.9	189392	98792.8	91894.4	53813.4	102631	200530	182300	260449	114290
0.70_262.1032m/z	262.103	0.7015	pos	Pseudouridine	HMDB0000767	Nucleosides, nucleotides, and analogues	Nucleoside and nucleotide analogues	Unclassified	C02067	48.2	50.8	M+NH4	C9H12N2O6	-0.551152	1.81934	0.0197587	0.468819	1.38398	93022.7	67214.1	83006	94564.4	112433	82087.4	56341.9	75030.9	72010.9	65473
3.99_417.1403m/z	417.14	3.99427	neg	Oleoside dimethyl ester	HMDB0031350	Lipids and lipid-like molecules	Prenol lipids	Terpene glycosides		49	45.9	M-H	C18H26O11	0.0603686	4.34272	0.0205536	-0.395171	0.760399	469668	617660	496389	455256	392162	534867	677597	523629	597405	672011
0.82_103.0036m/z	103.004	0.817467	neg	Tartronate semialdehyde	HMDB0006938	Organic oxygen compounds	Organooxygen compounds	Carbohydrates and carbohydrate conjugates	C01146	47.6	40.4	M-H	C3H4O4	-0.979467	2.75681	0.0205573	-0.3139	0.804464	239478	297687	229694	265017	224860	238342	274305	297956	343863	274622
1.31_239.1027m/z	239.103	1.30748	pos	Methyl dioxindole-3-acetate	HMDB0038991	Organoheterocyclic compounds	Indoles and derivatives	Indolyl carboxylic acids and derivatives		43.1	19.9	M+NH4	C11H11NO4	0.185999	1.48196	0.0209732	0.809077	1.75209	39766.4	22696.6	29751.7	44126.9	51724.9	33462.3	25623.9	21966.9	16646.7	26548.8
0.77_173.0921m/z	173.092	0.769833	pos	Diaminopimelic acid	HMDB0001370	Organic acids and derivatives	Carboxylic acids and derivatives	Amino acids, peptides, and analogues	C00666	38.9	0	M+H-H2O	C7H14N2O4	0.303132	1.71881	0.0215253	0.762499	1.69643	57934	34150.6	45716	72172.3	66878.3	46969.3	33051.8	36631.5	24722.7	42196.5
0.76_313.0777m/z	313.078	0.762533	neg	Inosine	HMDB0000195	Nucleosides, nucleotides, and analogues	Purine nucleosides	Unclassified	C00294	40.9	18.1	M+FA-H	C10H12N4O5	-4.65729	1.03787	0.0215711	0.474224	1.38917	29291.8	21085.8	25009.5	30261.9	33616.3	28279.5	21117	26471.9	19451.2	17303.2
0.79_261.1325n	244.129	0.787433	pos	Gamma glutamyl ornithine	HMDB0002248	Organic acids and derivatives	Carboxylic acids and derivatives	Amino acids, peptides, and analogues		38.3	0	M+H-H2O, M+H	C10H19N3O5	0.166932	1.69719	0.0219633	0.374369	1.29627	99706.8	76918.1	87743.2	111249	106944	92890.8	85346.9	74258.5	64245.9	83820.9
1.02_240.9907m/z	240.991	1.01502	pos	Xanthotoxol	HMDB0029457	Phenylpropanoids and polyketides	Coumarins and derivatives	Furanocoumarins	C00841	37.3	2.11	M+K	C11H6O4	4.68202	2.38261	0.0225027	-0.379104	0.768915	145037	188625	136277	162818	138526	142527	168855	177131	226586	181929
2.19_165.0789n	164.072	2.1865	neg	L-Phenylalanine	HMDB0000159	Organic acids and derivatives	Carboxylic acids and derivatives	Amino acids, peptides, and analogues	C00079	49.5	58.1	M-H, M+FA-H	C9H11NO2	-0.725275	2.09666	0.0241475	0.454918	1.3707	130022	94858.1	111439	148443	148263	111945	105876	91808.2	82300	99447.8
0.84_303.1453m/z	303.145	0.842783	pos	Garcinia lactone dibutyl ester	HMDB0040462	Organic acids and derivatives	Carboxylic acids and derivatives	Tricarboxylic acids and derivatives		43.2	37.4	M+H	C14H22O7	4.8441	1.1549	0.0243199	0.592402	1.50775	31920.9	21171.2	27001.7	36987.8	38865.1	24829	22453.9	20934.6	19153.2	22143
4.63_355.1727m/z	355.173	4.63317	pos	Betulalbuside A	HMDB0035634	Lipids and lipid-like molecules	Fatty Acyls	Fatty acyl glycosides		39.7	2.85	M+Na	C16H28O7	-0.059278	1.80871	0.0244631	-1.13401	0.455647	21733	47697.1	32918	13495.1	14492.4	26026.6	41972.6	40290.6	69591.5	38933.6
0.75_277.1030m/z	277.103	0.7526	pos	Distichonic acid A	HMDB0038752	Organic acids and derivatives	Carboxylic acids and derivatives	Amino acids, peptides, and analogues		38.7	0	M+H-H2O	C10H18N2O8	-0.100843	1.65824	0.0265628	0.421779	1.33958	88517.5	66078.6	81783.8	93874	105746	72665.6	64140.1	68018.3	59833.5	72322.5
4.29_355.1037m/z	355.104	4.29282	neg	(E)-1-O-Cinnamoyl-beta-D-glucose	HMDB0030293	Phenylpropanoids and polyketides	Cinnamic acids and derivatives	Cinnamic acid esters		44.9	30.1	M+FA-H	C15H18O7	0.805321	1.02537	0.0280753	-1.19425	0.437013	6445.65	14749.3	7683.74	4820.92	5584.75	7693.18	8985.19	11761.8	21662.1	16588.2
1.07_169.0741n	187.108	1.07265	pos	Norepinephrine	HMDB0000216	Benzenoids	Phenols	Benzenediols	C00547	39.3	1.54	M+H, M+NH4	C8H11NO3	1.05635	1.47935	0.0281892	0.412608	1.33109	70974.8	53320.8	66027.8	75026	78947.7	63897.8	62651.1	50136.9	40723.8	59771.6
1.09_175.1079m/z	175.108	1.09063	pos	Camphor	HMDB0059838	Lipids and lipid-like molecules	Prenol lipids	Monoterpenoids		37	0	M+Na	C10H16O	-9.6198	1.52757	0.028373	0.822276	1.76819	42685.8	24140.9	29969.4	47646.8	57192.2	35935	29523.2	21521.9	19713.8	25804.8
3.87_328.1160n	327.109	3.86567	neg	Ethylvanillin glucoside	HMDB0037682	Organic oxygen compounds	Organooxygen compounds	Carbohydrates and carbohydrate conjugates		39.2	0.00677	M-H, 2M-H, M+FA-H	C15H20O8	0.407337	2.65248	0.0296145	-0.508984	0.702717	134597	191539	163191	124564	110228	140406	191119	177442	237383	160210
4.08_373.1834m/z	373.183	4.08425	pos	trans-p-Menthane-1,7,8-triol 8-glucoside	HMDB0034784	Organic oxygen compounds	Organooxygen compounds	Carbohydrates and carbohydrate conjugates		41	10.5	M+Na	C16H30O8	0.297333	1.48896	0.0302172	-0.758156	0.591252	26536.7	44882.3	30585.1	14949.5	20946.9	39665.5	38980	38458	50671.5	51419.8
5.52_577.4184m/z	577.418	5.5222	pos	gamma-Chaconine	HMDB0033678	Lipids and lipid-like molecules	Steroids and steroid derivatives	Steroidal glycosides		36.7	3.4	M+NH4	C33H53NO6	-4.77761	1.46175	0.0303638	-0.278657	0.824358	81206.3	98508.5	82464.4	73808.5	88686.9	79865.3	93822.4	88889	97885.4	113437
1.27_175.1078m/z	175.108	1.26748	pos	L-Theanine	HMDB0034365	Organic acids and derivatives	Carboxylic acids and derivatives	Amino acids, peptides, and analogues	C01047	42.5	19.7	M+H	C7H14N2O3	0.494487	1.05908	0.030922	0.932294	1.90831	19847.8	10400.7	15726.2	24380.3	25140.4	14144.2	8799.33	10639.9	6934.35	15229.3
12.12_335.1515m/z	335.151	12.1203	pos	Hydrocinchonine	HMDB0030283	Alkaloids and derivatives	Cinchona alkaloids	Unclassified		41.2	14	M+K	C19H24N2O	-1.84905	1.78278	0.0316953	0.572856	1.48747	80017.2	53794.4	70200.5	80623.7	103097	66148.2	40545.7	60275.6	57033.9	57322.2
4.00_372.1420n	395.131	4.00317	pos	Citrusin E	HMDB0039234	Organic oxygen compounds	Organooxygen compounds	Carbohydrates and carbohydrate conjugates		43.8	22.5	M+Na, M+K, M+NH4	C17H24O9	-0.151378	6.70844	0.0319098	-0.348316	0.7855	1.3573e+06	1.72795e+06	1.50851e+06	1.27924e+06	1.12898e+06	1.51248e+06	1.90936e+06	1.46104e+06	1.77359e+06	1.76781e+06
4.64_377.1818m/z	377.182	4.63705	neg	7-Hydroxyterpineol 8-glucoside	HMDB0033019	Organic oxygen compounds	Organooxygen compounds	Carbohydrates and carbohydrate conjugates		45.6	31.9	M+FA-H	C16H28O7	0.363299	1.30065	0.0320286	-1.02587	0.491116	13470.1	27427.6	18691.7	6844.73	10157.1	18187	22881.6	23281.5	39604.1	23943.4
4.53_643.3352m/z	643.335	4.529	pos	Capsianoside I	HMDB0002318	Lipids and lipid-like molecules	Fatty Acyls	Fatty acyl glycosides		37.6	8.52	M+H-H2O	C32H52O14	4.16543	1.21506	0.0340941	1.38869	2.61842	20152.9	7696.6	11688	31578.9	18537.7	18807	10848.4	7504.6	2443.61	9989.78
0.77_203.1027m/z	203.103	0.769833	pos	L-Coprine	HMDB0034266	Organic acids and derivatives	Carboxylic acids and derivatives	Amino acids, peptides, and analogues	C08271	43.5	22.7	M+H	C8H14N2O4	0.183971	1.29773	0.0352635	0.318135	1.24672	70752.2	56750.8	66921.6	75874.6	71131.3	69081.2	66648.3	51507.8	46027.4	62819.5
3.65_377.0820m/z	377.082	3.65333	pos	5-Caffeoylquinic acid	5315832	Organic oxygen compounds	Organooxygen compounds	Alcohols and polyols	C17147	36.5	0	M+Na	C16H18O9	-6.40429	1.00695	0.0355578	-0.718168	0.607869	13331.2	21931	19113.4	6596.26	11633.4	15981.7	19135.8	25947.8	23358.7	19281.8
1.27_410.2537m/z	410.254	1.26748	pos	Dihydrofukinolide	HMDB0034662	Lipids and lipid-like molecules	Prenol lipids	Terpene lactones		42.8	21.9	M+NH4	C22H32O6	-0.0718294	1.59861	0.0372906	-0.546743	0.684564	45164.4	65975.5	46156.4	45465.3	49562.7	39473.2	66357.1	55183.3	55238.1	87123.3
0.69_113.0243m/z	113.024	0.69275	neg	2-C-Methyl-1,4-erythrono-D-lactone	HMDB0029884	Organoheterocyclic compounds	Lactones	Gamma butyrolactones		46.1	35.2	M-H2O-H	C5H8O4	-0.664665	1.11795	0.0380042	-0.310005	0.806639	44493.9	55159.6	48302.2	40676	44656.2	44341.2	63278	45280.1	55792.3	56288
5.09_317.1969m/z	317.197	5.08947	neg	L-Citronellol glucoside	HMDB0029850	Lipids and lipid-like molecules	Prenol lipids	Terpene glycosides		44	23.8	M-H	C16H30O6	-0.174077	1.53399	0.0382921	-0.577552	0.6701	41086.9	61314.6	24716.6	52411.3	49325.4	37894.3	64977.6	71165.2	50962.7	58152.9
0.79_189.1234m/z	189.123	0.787433	pos	N6-Acetyl-L-lysine	HMDB0000206	Organic acids and derivatives	Carboxylic acids and derivatives	Amino acids, peptides, and analogues	C02727	48.3	44.9	M+H	C8H16N2O3	0.353204	2.45354	0.038458	-0.411032	0.752085	161621	214897	138243	171182	186280	150781	263527	210292	201897	183874
4.02_386.1213n	431.119	4.01508	neg	1-O-Sinapoylglucose	HMDB0041175	Phenylpropanoids and polyketides	Cinnamic acids and derivatives	Hydroxycinnamic acids and derivatives		48.1	41.7	M-H, M+FA-H	C17H22O10	-0.0942061	1.95383	0.0388739	-0.344467	0.787599	118022	149851	132813	123967	97450	117859	152637	162316	162175	122275
1.35_226.0839m/z	226.084	1.3464	pos	3-Indolebutyric acid	HMDB0002096	Organoheterocyclic compounds	Indoles and derivatives	Indoles	C11284	38.8	2.73	M+Na	C12H13NO2	0.41132	1.07986	0.0388831	-0.606333	0.656864	18719.7	28498.6	23412.7	21484	12449.5	17532.7	34419.7	31357.7	26688	21529.1
3.82_344.1108n	343.103	3.82473	neg	Domesticoside	HMDB0029647	Organic oxygen compounds	Organooxygen compounds	Carbohydrates and carbohydrate conjugates		53.6	73.1	M-H, M+FA-H	C15H20O9	0.0802342	1.46624	0.0393773	-0.646496	0.63883	31596.3	49459.6	40241.8	24880.7	23576.3	37686.3	51514.9	36553.3	47631.4	62138.8
3.71_267.1339m/z	267.134	3.71425	pos	N5-(4-Methoxybenzyl)glutamine	HMDB0033598	Organic acids and derivatives	Carboxylic acids and derivatives	Amino acids, peptides, and analogues		51	57.9	M+H	C13H18N2O4	-0.0832661	1.11299	0.0394601	0.355414	1.27935	45058.1	35219.4	37104.8	45265.6	51523.9	46338.1	39713.9	38023.2	29636.9	33503.8
1.23_284.0989m/z	284.099	1.23083	pos	Guanosine	HMDB0000133	Nucleosides, nucleotides, and analogues	Purine nucleosides	Unclassified	C00387	52.3	64.9	M+H	C10H13N5O5	-0.0894962	4.86903	0.0395993	0.366747	1.28944	883139	684900	930516	824555	991438	786048	648824	858591	594391	637796
3.64_387.0372m/z	387.037	3.63557	pos	(-)-Epigallocatechin sulfate	HMDB0012468	Phenylpropanoids and polyketides	Flavonoids	Sulfated flavonoids		37.8	0	M+H	C15H14O10S	-2.25133	1.18444	0.0396022	-0.464268	0.724839	31986.9	44129.7	40609.9	19577.2	31035	36725.5	42423.1	43604.7	45705	44785.8
5.56_397.1257m/z	397.126	5.56453	pos	Kievitol	HMDB0038112	Phenylpropanoids and polyketides	Isoflavonoids	Isoflavans		40	4.74	M+Na	C20H22O7	-0.278444	2.03646	0.0409731	1.00515	2.00715	70695.9	35222.1	83121.2	51672.8	86730.9	61258.8	15123.6	55682.2	18329.8	51752.7
1.23_152.0568m/z	152.057	1.23083	pos	3,3-Dimethyl-1,2-dithiolane	HMDB0038974	Organoheterocyclic compounds	Dithiolanes	1,2-dithiolanes		39.1	12.6	M+NH4	C5H10S2	4.1681	1.53278	0.0416706	0.370426	1.29273	87194.1	67449.3	91601.3	81632.9	94176.7	81365.4	61961.9	87959.3	58330	61546
4.04_323.1349m/z	323.135	4.03588	neg	3-Mercapto-3-methyl-1-butyl acetate	HMDB0039227	Organic acids and derivatives	Carboxylic acids and derivatives	Carboxylic acid derivatives		38.7	3.43	2M-H	C7H14O2S	-2.38022	1.33073	0.0440076	0.381827	1.30299	67815.3	52045.8	64877.4	80523	60278.1	65582.4	46404.6	65112.5	48484.1	48182.2
6.76_383.1514m/z	383.151	6.76045	pos	Kanzonol O	HMDB0041102	Phenylpropanoids and polyketides	Isoflavonoids	Pyranoisoflavonoids		37	0	M+H	C22H22O6	6.37512	1.03565	0.0445523	-0.238457	0.847651	54322	64085.4	55617.1	51407.8	51753.4	58509.9	72892.1	66250	57685.8	59513.5
6.21_559.2735m/z	559.273	6.21265	neg	Cinncassiol D1 glucoside	HMDB0034677	Lipids and lipid-like molecules	Prenol lipids	Terpene glycosides		47	47.5	M+FA-H	C26H42O10	-4.9514	1.22969	0.0452375	-0.834519	0.56077	16591.5	29587	24992.3	10511.4	12179.9	18682.4	24371.1	33419.1	38784.7	21773
1.02_104.0108n	103.004	1.02425	neg	Hydroxypyruvic acid	HMDB0001352	Organic acids and derivatives	Hydroxy acids and derivatives	Beta hydroxy acids and derivatives	C00168	40.3	4.14	M-H, 2M-H	C3H4O4	-1.37941	2.39623	0.0452623	-0.25802	0.836235	247021	295396	236609	268426	222952	260096	275663	287769	342855	275298
0.79_118.0865m/z	118.086	0.787433	pos	L-Valine	HMDB0000883	Organic acids and derivatives	Carboxylic acids and derivatives	Amino acids, peptides, and analogues	C00183	47.2	44	M+H	C5H11NO2	2.07197	14.3792	0.0457715	-0.417469	0.748737	5.11518e+06	6.83174e+06	5.11161e+06	5.86006e+06	4.61146e+06	4.87757e+06	7.44001e+06	5.79444e+06	5.78136e+06	8.31115e+06
1.19_324.2169m/z	324.217	1.19023	pos	Capsiate	HMDB0034780	Benzenoids	Phenols	Methoxyphenols	C20203	40.2	6.67	M+NH4	C18H26O4	-0.0027435	1.63248	0.0460502	-0.357903	0.780298	82788.7	106099	80563.2	95823.1	78936.8	75831.5	127565	107512	100754	88564
0.69_210.0375n	191.02	0.69275	neg	Galactaric acid	HMDB0000639	Organic oxygen compounds	Organooxygen compounds	Carbohydrates and carbohydrate conjugates	C00879	49.7	50.4	M-H2O-H, M-H	C6H10O8	-0.322401	6.76629	0.0472059	-0.263002	0.833352	2.01175e+06	2.41405e+06	2.3123e+06	1.84505e+06	1.81004e+06	2.07962e+06	2.52552e+06	2.4644e+06	2.58007e+06	2.08621e+06
