# Supplementary material for: Multi-omics research on common allergens during the ripening of pollen and poplar flocs of Populus deltoides
Source: Front Plant Sci. 2023 Jun 16;14:1136613. doi: 10.3389/fpls.2023.1136613 (PMC10313134; doi:10.3389/fpls.2023.1136613)
Supplement: Supplementary file 4 [file Table_4.xlsx]

## Sheet: pollen group P_M
	A0A2I4GL39	A0A833WXQ5	A0A2I4F0G5	A0A834D2J8	A0A833TEN4	A0A6P9EEH3	A0A2I4ERL8	A0A834CU35	A0A2I4HL04	A0A2I4FEU6	A0A2I4GFN0	A0A2I4H8K8	A0A2I4GID5	A0A2I4EGF0	A0A2I4DE51	A0A2I4EH85	A0A2I4DHB7	A0A2I4FTS9	A0A2I4GZP3	A0A833XCG4
6-Hydroxy-4-methoxy-3-(3-methyl-2-butenyl)-2-(2-phenylethenyl)benzoic acid	0.99976	-0.999645	0.999184	0.999277	-0.999168	0.999154	0.998136	0.998204	0.997599	0.997368	0.998636	0.990846	0.986357	0.985393	0.982397	0.974654	0.972858	-0.967849	0.95773	0.942359
w-O-beta-D-Glucopyranosylaloeemodin	0.998957	-0.99899	0.999261	0.998855	-0.999374	0.998674	0.998923	0.998535	0.998706	0.998071	0.997086	0.987212	0.98813	0.989293	0.980565	0.973084	0.972048	-0.965232	0.954245	0.939023
Lansiumarin B	0.999665	-0.999769	0.999466	0.999009	-0.998927	0.998689	0.997533	0.998416	0.996777	0.997491	0.998375	0.991568	0.984969	0.98556	0.984163	0.977296	0.970222	-0.970853	0.95555	0.944345
5,7-Dihydroxy-3',4',5'-trimethoxyflavone	0.999038	-0.999352	0.999792	0.99863	-0.998887	0.998011	0.997878	0.999096	0.997192	0.998428	0.997007	0.989507	0.985971	0.98887	0.984069	0.97775	0.968258	-0.971063	0.951774	0.944113
Selinone	0.999075	-0.999261	0.99962	0.99884	-0.999197	0.99838	0.998412	0.998934	0.997974	0.998366	0.997123	0.988564	0.987083	0.989128	0.982464	0.975641	0.97007	-0.968414	0.952916	0.942022
6''-Malonylgenistin	0.999475	-0.999191	0.998683	0.999281	-0.999416	0.999412	0.99877	0.997719	0.998639	0.997069	0.998392	0.988741	0.98791	0.985961	0.979539	0.971094	0.975198	-0.963325	0.958784	0.938459
Cabreuvin	0.998422	-0.998834	0.99973	0.99821	-0.998626	0.997383	0.997919	0.999315	0.997301	0.998825	0.995942	0.988005	0.986618	0.990672	0.983608	0.977496	0.967157	-0.970706	0.949491	0.943863
Piperenol A	0.998292	-0.998304	0.998975	0.998461	-0.999005	0.998091	0.999077	0.998656	0.998965	0.998397	0.996044	0.985617	0.989358	0.990776	0.979486	0.971718	0.972077	-0.963877	0.953059	0.938593
4-Hydroxyproline	-0.99884	0.997992	-0.997994	-0.998384	0.99738	-0.998549	-0.999164	-0.998243	-0.997882	-0.997649	-0.997362	-0.989593	-0.990398	-0.985532	-0.981281	-0.969583	-0.978648	0.96509	-0.963985	-0.942375
Armillyl orsellinate	0.999432	-0.998824	0.998005	0.999196	-0.998983	0.999592	0.998848	0.997149	0.99862	0.99646	0.998686	0.989003	0.988577	0.984202	0.97852	0.968718	0.97805	-0.961388	0.962399	0.937679
Isosalicin	0.997768	-0.997123	0.997599	0.998063	-0.997937	0.998053	0.999587	0.997891	0.999305	0.997746	0.995784	0.984866	0.991998	0.988992	0.976923	0.96616	0.977812	-0.959319	0.959259	0.936974
Sesamolinol	0.998294	-0.998857	0.999803	0.997855	-0.998177	0.996879	0.997152	0.999317	0.99625	0.998694	0.995762	0.989035	0.98506	0.990101	0.985357	0.979867	0.96493	-0.973646	0.948129	0.946005
7-Hydroxy-3',4',5,6-tetramethoxyflavone	0.999797	-0.999658	0.998786	0.998773	-0.998147	0.998698	0.996746	0.9976	0.9956	0.996398	0.999094	0.993683	0.983658	0.981973	0.984937	0.977183	0.971594	-0.971766	0.959237	0.945689
Theaflagallin	0.99963	-0.99944	0.998148	0.99843	-0.997612	0.998447	0.995792	0.996715	0.994583	0.995331	0.999344	0.994644	0.982071	0.979464	0.98492	0.977189	0.971402	-0.971964	0.960224	0.94597
N6-Acetyl-L-lysine	-0.999494	0.999736	-0.99916	-0.998296	0.999589	-0.999353	-0.998071	-0.996783	-0.997361	-0.995797	-0.998332	-0.988141	-0.983221	-0.986064	-0.982481	-0.975972	-0.970069	0.967079	-0.95523	-0.933859
Vicine	-0.997408	0.997186	-0.997933	-0.998638	0.996574	-0.995638	-0.996102	-0.999806	-0.996186	-0.999545	-0.995347	-0.991469	-0.990192	-0.986754	-0.980675	-0.972773	-0.970862	0.969071	-0.952506	-0.956993
Methionine sulfoxide	-0.998724	0.998235	-0.998238	-0.996429	0.997227	-0.998921	-0.999489	-0.99646	-0.996794	-0.995449	-0.99702	-0.986914	-0.985397	-0.986144	-0.984851	-0.973556	-0.975236	0.967782	-0.96349	-0.930771
Protocatechuic acid	-0.998991	0.999073	-0.998976	-0.996124	0.997708	-0.998844	-0.998527	-0.996147	-0.995658	-0.994852	-0.997284	-0.987532	-0.98127	-0.986146	-0.987567	-0.978795	-0.969776	0.972061	-0.958939	-0.92989
Oxidihydroartocarpesin	0.99882	-0.99922	0.998989	0.997625	-0.997092	0.996866	0.995022	0.997905	0.993513	0.996637	0.997472	0.994057	0.980797	0.983104	0.988011	0.982373	0.964741	-0.977713	0.952487	0.950078
QUERCETIN TETRAMETHYL (5,7,3',4') ETHER	0.99832	-0.997483	0.996532	0.998498	-0.998603	0.999218	0.998869	0.995666	0.99925	0.995218	0.997696	0.985524	0.98982	0.983969	0.973761	0.963089	0.980506	-0.954382	0.963138	0.93173

## Sheet: pollen group PM
	A0A2I4GL39	A0A833WXQ5	A0A2I4F0G5	A0A834D2J8	A0A833TEN4	A0A6P9EEH3	A0A2I4ERL8	A0A834CU35	A0A2I4HL04	A0A2I4FEU6	A0A2I4GFN0	A0A2I4H8K8	A0A2I4GID5	A0A2I4EGF0	A0A2I4DE51	A0A2I4EH85	A0A2I4DHB7	A0A2I4FTS9	A0A2I4GZP3	A0A833XCG4	6-Hydroxy-4-methoxy-3-(3-methyl-2-butenyl)-2-(2-phenylethenyl)benzoic acid	w-O-beta-D-Glucopyranosylaloeemodin	Lansiumarin B	5,7-Dihydroxy-3',4',5'-trimethoxyflavone	Selinone	6''-Malonylgenistin	Cabreuvin	Piperenol A	4-Hydroxyproline	Armillyl orsellinate	Isosalicin	Sesamolinol	7-Hydroxy-3',4',5,6-tetramethoxyflavone	Theaflagallin	N6-Acetyl-L-lysine	Vicine	Methionine sulfoxide	Protocatechuic acid	Oxidihydroartocarpesin	QUERCETIN TETRAMETHYL (5,7,3',4') ETHER
A0A2I4GL39	1	-0.999699	0.998699	0.998622	-0.998521	0.999508	0.997828	0.997023	0.996481	0.995823	0.999368	0.991991	0.984153	0.98237	0.984079	0.975294	0.973964	-0.9691	0.961875	0.939815	0.99976	0.998957	0.999665	0.999038	0.999075	0.999475	0.998422	0.998292	-0.99884	0.999432	0.997768	0.998294	0.999797	0.99963	-0.999494	-0.997408	-0.998724	-0.998991	0.99882	0.99832
A0A833WXQ5	-0.999699	1	-0.999371	-0.998185	0.998936	-0.998936	-0.997173	-0.997124	-0.995939	-0.995906	-0.998619	-0.990899	-0.981654	-0.984494	-0.985465	-0.979211	-0.968336	0.971838	-0.955353	-0.938893	-0.999645	-0.99899	-0.999769	-0.999352	-0.999261	-0.999191	-0.998834	-0.998304	0.997992	-0.998824	-0.997123	-0.998857	-0.999658	-0.99944	0.999736	0.997186	0.998235	0.999073	-0.99922	-0.997483
A0A2I4F0G5	0.998699	-0.999371	1	0.997479	-0.998583	0.997609	0.997433	0.998426	0.996095	0.997561	0.996378	0.988452	0.982815	0.98954	0.986486	0.981199	0.964394	-0.974053	0.949066	0.940484	0.999184	0.999261	0.999466	0.999792	0.99962	0.998683	0.99973	0.998975	-0.997994	0.998005	0.997599	0.999803	0.998786	0.998148	-0.99916	-0.997933	-0.998238	-0.998976	0.998989	0.996532
A0A834D2J8	0.998622	-0.998185	0.997479	1	-0.998588	0.997928	0.996734	0.998037	0.997955	0.997635	0.997923	0.990935	0.989769	0.983474	0.975907	0.968073	0.975473	-0.96122	0.956865	0.948728	0.999277	0.998855	0.999009	0.99863	0.99884	0.999281	0.99821	0.998461	-0.998384	0.999196	0.998063	0.997855	0.998773	0.99843	-0.998296	-0.998638	-0.996429	-0.996124	0.997625	0.998498
A0A833TEN4	-0.998521	0.998936	-0.998583	-0.998588	1	-0.998526	-0.997529	-0.996754	-0.998276	-0.996198	-0.997178	-0.985661	-0.984941	-0.987773	-0.977724	-0.972653	-0.969031	0.962045	-0.95015	-0.934162	-0.999168	-0.999374	-0.998927	-0.998887	-0.999197	-0.999416	-0.998626	-0.999005	0.99738	-0.998983	-0.997937	-0.998177	-0.998147	-0.997612	0.999589	0.996574	0.997227	0.997708	-0.997092	-0.998603
A0A6P9EEH3	0.999508	-0.998936	0.997609	0.997928	-0.998526	1	0.998562	0.995303	0.997332	0.994171	0.999135	0.988601	0.984621	0.981894	0.980648	0.970498	0.977311	-0.96274	0.964903	0.930553	0.999154	0.998674	0.998689	0.998011	0.99838	0.999412	0.997383	0.998091	-0.998549	0.999592	0.998053	0.996879	0.998698	0.998447	-0.999353	-0.995638	-0.998921	-0.998844	0.996866	0.999218
A0A2I4ERL8	0.997828	-0.997173	0.997433	0.996734	-0.997529	0.998562	1	0.996426	0.998533	0.995936	0.995926	0.983628	0.989088	0.988117	0.979242	0.967606	0.97772	-0.960476	0.962081	0.928913	0.998136	0.998923	0.997533	0.997878	0.998412	0.99877	0.997919	0.999077	-0.999164	0.998848	0.999587	0.997152	0.996746	0.995792	-0.998071	-0.996102	-0.999489	-0.998527	0.995022	0.998869
A0A834CU35	0.997023	-0.997124	0.998426	0.998037	-0.996754	0.995303	0.996426	1	0.99633	0.999833	0.994346	0.989337	0.989551	0.989634	0.981531	0.974548	0.968018	-0.970107	0.948786	0.954148	0.998204	0.998535	0.998416	0.999096	0.998934	0.997719	0.999315	0.998656	-0.998243	0.997149	0.997891	0.999317	0.9976	0.996715	-0.996783	-0.999806	-0.99646	-0.996147	0.997905	0.995666
A0A2I4HL04	0.996481	-0.995939	0.996095	0.997955	-0.998276	0.997332	0.998533	0.99633	1	0.996526	0.994813	0.981351	0.992477	0.988684	0.969977	0.96064	0.977593	-0.950926	0.955214	0.932862	0.997599	0.998706	0.996777	0.997192	0.997974	0.998639	0.997301	0.998965	-0.997882	0.99862	0.999305	0.99625	0.9956	0.994583	-0.997361	-0.996186	-0.996794	-0.995658	0.993513	0.99925
A0A2I4FEU6	0.995823	-0.995906	0.997561	0.997635	-0.996198	0.994171	0.995936	0.999833	0.996526	1	0.992849	0.987254	0.991184	0.990724	0.978377	0.971522	0.967837	-0.966705	0.946149	0.954726	0.997368	0.998071	0.997491	0.998428	0.998366	0.997069	0.998825	0.998397	-0.997649	0.99646	0.997746	0.998694	0.996398	0.995331	-0.995797	-0.999545	-0.995449	-0.994852	0.996637	0.995218
A0A2I4GFN0	0.999368	-0.998619	0.996378	0.997923	-0.997178	0.999135	0.995926	0.994346	0.994813	0.992849	1	0.99323	0.982157	0.975588	0.981066	0.971107	0.976975	-0.965015	0.966973	0.938362	0.998636	0.997086	0.998375	0.997007	0.997123	0.998392	0.995942	0.996044	-0.997362	0.998686	0.995784	0.995762	0.999094	0.999344	-0.998332	-0.995347	-0.99702	-0.997284	0.997472	0.997696
A0A2I4H8K8	0.991991	-0.990899	0.988452	0.990935	-0.985661	0.988601	0.983628	0.989337	0.981351	0.987254	0.99323	1	0.973062	0.959397	0.982438	0.972024	0.966637	-0.974778	0.962564	0.964673	0.990846	0.987212	0.991568	0.989507	0.988564	0.988741	0.988005	0.985617	-0.989593	0.989003	0.984866	0.989035	0.993683	0.994644	-0.988141	-0.991469	-0.986914	-0.987532	0.994057	0.985524
A0A2I4GID5	0.984153	-0.981654	0.982815	0.989769	-0.984941	0.984621	0.989088	0.989551	0.992477	0.991184	0.982157	0.973062	1	0.978263	0.94911	0.932434	0.983988	-0.929014	0.955352	0.946378	0.986357	0.98813	0.984969	0.985971	0.987083	0.98791	0.986618	0.989358	-0.990398	0.988577	0.991998	0.98506	0.983658	0.982071	-0.983221	-0.990192	-0.985397	-0.98127	0.980797	0.98982
A0A2I4EGF0	0.98237	-0.984494	0.98954	0.983474	-0.987773	0.981894	0.988117	0.989634	0.988684	0.990724	0.975588	0.959397	0.978263	1	0.968193	0.967559	0.941263	-0.955435	0.911145	0.91975	0.985393	0.989293	0.98556	0.98887	0.989128	0.985961	0.990672	0.990776	-0.985532	0.984202	0.988992	0.990101	0.981973	0.979464	-0.986064	-0.986754	-0.986144	-0.986146	0.983104	0.983969
A0A2I4DE51	0.984079	-0.985465	0.986486	0.975907	-0.977724	0.980648	0.979242	0.981531	0.969977	0.978377	0.981066	0.982438	0.94911	0.968193	1	0.993861	0.934859	-0.995222	0.93945	0.927156	0.982397	0.980565	0.984163	0.984069	0.982464	0.979539	0.983608	0.979486	-0.981281	0.97852	0.976923	0.985357	0.984937	0.98492	-0.982481	-0.980675	-0.984851	-0.987567	0.988011	0.973761
A0A2I4EH85	0.975294	-0.979211	0.981199	0.968073	-0.972653	0.970498	0.967606	0.974548	0.96064	0.971522	0.971107	0.972024	0.932434	0.967559	0.993861	1	0.904345	-0.995479	0.902563	0.922303	0.974654	0.973084	0.977296	0.97775	0.975641	0.971094	0.977496	0.971718	-0.969583	0.968718	0.96616	0.979867	0.977183	0.977189	-0.975972	-0.972773	-0.973556	-0.978795	0.982373	0.963089
A0A2I4DHB7	0.973964	-0.968336	0.964394	0.975473	-0.969031	0.977311	0.97772	0.968018	0.977593	0.967837	0.976975	0.966637	0.983988	0.941263	0.934859	0.904345	1	-0.904349	0.989153	0.911846	0.972858	0.972048	0.970222	0.968258	0.97007	0.975198	0.967157	0.972077	-0.978648	0.97805	0.977812	0.96493	0.971594	0.971402	-0.970069	-0.970862	-0.975236	-0.969776	0.964741	0.980506
A0A2I4FTS9	-0.9691	0.971838	-0.974053	-0.96122	0.962045	-0.96274	-0.960476	-0.970107	-0.950926	-0.966705	-0.965015	-0.974778	-0.929014	-0.955435	-0.995222	-0.995479	-0.904349	1	-0.90953	-0.935834	-0.967849	-0.965232	-0.970853	-0.971063	-0.968414	-0.963325	-0.970706	-0.963877	0.96509	-0.961388	-0.959319	-0.973646	-0.971766	-0.971964	0.967079	0.969071	0.967782	0.972061	-0.977713	-0.954382
A0A2I4GZP3	0.961875	-0.955353	0.949066	0.956865	-0.95015	0.964903	0.962081	0.948786	0.955214	0.946149	0.966973	0.962564	0.955352	0.911145	0.93945	0.902563	0.989153	-0.90953	1	0.88964	0.95773	0.954245	0.95555	0.951774	0.952916	0.958784	0.949491	0.953059	-0.963985	0.962399	0.959259	0.948129	0.959237	0.960224	-0.95523	-0.952506	-0.96349	-0.958939	0.952487	0.963138
A0A833XCG4	0.939815	-0.938893	0.940484	0.948728	-0.934162	0.930553	0.928913	0.954148	0.932862	0.954726	0.938362	0.964673	0.946378	0.91975	0.927156	0.922303	0.911846	-0.935834	0.88964	1	0.942359	0.939023	0.944345	0.944113	0.942022	0.938459	0.943863	0.938593	-0.942375	0.937679	0.936974	0.946005	0.945689	0.94597	-0.933859	-0.956993	-0.930771	-0.92989	0.950078	0.93173
6-Hydroxy-4-methoxy-3-(3-methyl-2-butenyl)-2-(2-phenylethenyl)benzoic acid	0.99976	-0.999645	0.999184	0.999277	-0.999168	0.999154	0.998136	0.998204	0.997599	0.997368	0.998636	0.990846	0.986357	0.985393	0.982397	0.974654	0.972858	-0.967849	0.95773	0.942359	1	0.999622	0.999909	0.999639	0.999714	0.999815	0.99925	0.999173	-0.999096	0.999609	0.998526	0.999058	0.999673	0.999295	-0.999617	-0.998397	-0.998552	-0.998704	0.998871	0.998619
w-O-beta-D-Glucopyranosylaloeemodin	0.998957	-0.99899	0.999261	0.998855	-0.999374	0.998674	0.998923	0.998535	0.998706	0.998071	0.997086	0.987212	0.98813	0.989293	0.980565	0.973084	0.972048	-0.965232	0.954245	0.939023	0.999622	1	0.999419	0.999675	0.999903	0.999751	0.999623	0.999901	-0.999128	0.999422	0.999348	0.999226	0.998646	0.997906	-0.999409	-0.998306	-0.998715	-0.998597	0.997803	0.998815
Lansiumarin B	0.999665	-0.999769	0.999466	0.999009	-0.998927	0.998689	0.997533	0.998416	0.996777	0.997491	0.998375	0.991568	0.984969	0.98556	0.984163	0.977296	0.970222	-0.970853	0.95555	0.944345	0.999909	0.999419	1	0.999767	0.99969	0.999484	0.999386	0.998916	-0.998756	0.999145	0.997969	0.999368	0.999789	0.999444	-0.999492	-0.998548	-0.998258	-0.998682	0.999394	0.997826
5,7-Dihydroxy-3',4',5'-trimethoxyflavone	0.999038	-0.999352	0.999792	0.99863	-0.998887	0.998011	0.997878	0.999096	0.997192	0.998428	0.997007	0.989507	0.985971	0.98887	0.984069	0.97775	0.968258	-0.971063	0.951774	0.944113	0.999639	0.999675	0.999767	1	0.999932	0.999283	0.999909	0.999441	-0.998776	0.99877	0.998424	0.999854	0.999157	0.998531	-0.999227	-0.998869	-0.998313	-0.998628	0.999028	0.997505
Selinone	0.999075	-0.999261	0.99962	0.99884	-0.999197	0.99838	0.998412	0.998934	0.997974	0.998366	0.997123	0.988564	0.987083	0.989128	0.982464	0.975641	0.97007	-0.968414	0.952916	0.942022	0.999714	0.999903	0.99969	0.999932	1	0.999579	0.999858	0.99973	-0.999009	0.999149	0.998922	0.999647	0.999006	0.99833	-0.999384	-0.998713	-0.998544	-0.99866	0.998551	0.998185
6''-Malonylgenistin	0.999475	-0.999191	0.998683	0.999281	-0.999416	0.999412	0.99877	0.997719	0.998639	0.997069	0.998392	0.988741	0.98791	0.985961	0.979539	0.971094	0.975198	-0.963325	0.958784	0.938459	0.999815	0.999751	0.999484	0.999283	0.999579	1	0.998955	0.999429	-0.999181	0.999904	0.999101	0.998504	0.999076	0.998584	-0.999588	-0.99787	-0.998665	-0.998499	0.997778	0.999411
Cabreuvin	0.998422	-0.998834	0.99973	0.99821	-0.998626	0.997383	0.997919	0.999315	0.997301	0.998825	0.995942	0.988005	0.986618	0.990672	0.983608	0.977496	0.967157	-0.970706	0.949491	0.943863	0.99925	0.999623	0.999386	0.999909	0.999858	0.998955	1	0.999566	-0.99862	0.998351	0.998547	0.999908	0.998529	0.997724	-0.998816	-0.99888	-0.998141	-0.998344	0.998532	0.997144
Piperenol A	0.998292	-0.998304	0.998975	0.998461	-0.999005	0.998091	0.999077	0.998656	0.998965	0.998397	0.996044	0.985617	0.989358	0.990776	0.979486	0.971718	0.972077	-0.963877	0.953059	0.938593	0.999173	0.999901	0.998916	0.999441	0.99973	0.999429	0.999566	1	-0.99907	0.999074	0.99959	0.999079	0.997916	0.996989	-0.998884	-0.998267	-0.998568	-0.998202	0.997067	0.998613
4-Hydroxyproline	-0.99884	0.997992	-0.997994	-0.998384	0.99738	-0.998549	-0.999164	-0.998243	-0.997882	-0.997649	-0.997362	-0.989593	-0.990398	-0.985532	-0.981281	-0.969583	-0.978648	0.96509	-0.963985	-0.942375	-0.999096	-0.999128	-0.998756	-0.998776	-0.999009	-0.999181	-0.99862	-0.99907	1	-0.99929	-0.999453	-0.998199	-0.998458	-0.997786	0.998131	0.998439	0.999184	0.998267	-0.99724	-0.998594
Armillyl orsellinate	0.999432	-0.998824	0.998005	0.999196	-0.998983	0.999592	0.998848	0.997149	0.99862	0.99646	0.998686	0.989003	0.988577	0.984202	0.97852	0.968718	0.97805	-0.961388	0.962399	0.937679	0.999609	0.999422	0.999145	0.99877	0.999149	0.999904	0.998351	0.999074	-0.99929	1	0.999092	0.997807	0.9989	0.998469	-0.999276	-0.99749	-0.998684	-0.998256	0.997246	0.999662
Isosalicin	0.997768	-0.997123	0.997599	0.998063	-0.997937	0.998053	0.999587	0.997891	0.999305	0.997746	0.995784	0.984866	0.991998	0.988992	0.976923	0.96616	0.977812	-0.959319	0.959259	0.936974	0.998526	0.999348	0.997969	0.998424	0.998922	0.999101	0.998547	0.99959	-0.999453	0.999092	1	0.997807	0.997075	0.996081	-0.99794	-0.997712	-0.998706	-0.997588	0.995557	0.999044
Sesamolinol	0.998294	-0.998857	0.999803	0.997855	-0.998177	0.996879	0.997152	0.999317	0.99625	0.998694	0.995762	0.989035	0.98506	0.990101	0.985357	0.979867	0.96493	-0.973646	0.948129	0.946005	0.999058	0.999226	0.999368	0.999854	0.999647	0.998504	0.999908	0.999079	-0.998199	0.997807	0.997807	1	0.998614	0.997884	-0.998551	-0.998889	-0.997741	-0.998199	0.998981	0.996252
7-Hydroxy-3',4',5,6-tetramethoxyflavone	0.999797	-0.999658	0.998786	0.998773	-0.998147	0.998698	0.996746	0.9976	0.9956	0.996398	0.999094	0.993683	0.983658	0.981973	0.984937	0.977183	0.971594	-0.971766	0.959237	0.945689	0.999673	0.998646	0.999789	0.999157	0.999006	0.999076	0.998529	0.997916	-0.998458	0.9989	0.997075	0.998614	1	0.999906	-0.999094	-0.998067	-0.997892	-0.998368	0.999504	0.997374
Theaflagallin	0.99963	-0.99944	0.998148	0.99843	-0.997612	0.998447	0.995792	0.996715	0.994583	0.995331	0.999344	0.994644	0.982071	0.979464	0.98492	0.977189	0.971402	-0.971964	0.960224	0.94597	0.999295	0.997906	0.999444	0.998531	0.99833	0.998584	0.997724	0.996989	-0.997786	0.998469	0.996081	0.997884	0.999906	1	-0.998711	-0.997387	-0.997202	-0.997843	0.999372	0.996814
N6-Acetyl-L-lysine	-0.999494	0.999736	-0.99916	-0.998296	0.999589	-0.999353	-0.998071	-0.996783	-0.997361	-0.995797	-0.998332	-0.988141	-0.983221	-0.986064	-0.982481	-0.975972	-0.970069	0.967079	-0.95523	-0.933859	-0.999617	-0.999409	-0.999492	-0.999227	-0.999384	-0.999588	-0.998816	-0.998884	0.998131	-0.999276	-0.99794	-0.998551	-0.999094	-0.998711	1	0.996698	0.998516	0.999093	-0.998169	-0.998507
Vicine	-0.997408	0.997186	-0.997933	-0.998638	0.996574	-0.995638	-0.996102	-0.999806	-0.996186	-0.999545	-0.995347	-0.991469	-0.990192	-0.986754	-0.980675	-0.972773	-0.970862	0.969071	-0.952506	-0.956993	-0.998397	-0.998306	-0.998548	-0.998869	-0.998713	-0.99787	-0.99888	-0.998267	0.998439	-0.99749	-0.997712	-0.998889	-0.998067	-0.997387	0.996698	1	0.996228	0.995785	-0.99812	-0.995979
Methionine sulfoxide	-0.998724	0.998235	-0.998238	-0.996429	0.997227	-0.998921	-0.999489	-0.99646	-0.996794	-0.995449	-0.99702	-0.986914	-0.985397	-0.986144	-0.984851	-0.973556	-0.975236	0.967782	-0.96349	-0.930771	-0.998552	-0.998715	-0.998258	-0.998313	-0.998544	-0.998665	-0.998141	-0.998568	0.999184	-0.998684	-0.998706	-0.997741	-0.997892	-0.997202	0.998516	0.996228	1	0.999594	-0.996696	-0.998008
Protocatechuic acid	-0.998991	0.999073	-0.998976	-0.996124	0.997708	-0.998844	-0.998527	-0.996147	-0.995658	-0.994852	-0.997284	-0.987532	-0.98127	-0.986146	-0.987567	-0.978795	-0.969776	0.972061	-0.958939	-0.92989	-0.998704	-0.998597	-0.998682	-0.998628	-0.99866	-0.998499	-0.998344	-0.998202	0.998267	-0.998256	-0.997588	-0.998199	-0.998368	-0.997843	0.999093	0.995785	0.999594	1	-0.997691	-0.997175
Oxidihydroartocarpesin	0.99882	-0.99922	0.998989	0.997625	-0.997092	0.996866	0.995022	0.997905	0.993513	0.996637	0.997472	0.994057	0.980797	0.983104	0.988011	0.982373	0.964741	-0.977713	0.952487	0.950078	0.998871	0.997803	0.999394	0.999028	0.998551	0.997778	0.998532	0.997067	-0.99724	0.997246	0.995557	0.998981	0.999504	0.999372	-0.998169	-0.99812	-0.996696	-0.997691	1	0.995028
QUERCETIN TETRAMETHYL (5,7,3',4') ETHER	0.99832	-0.997483	0.996532	0.998498	-0.998603	0.999218	0.998869	0.995666	0.99925	0.995218	0.997696	0.985524	0.98982	0.983969	0.973761	0.963089	0.980506	-0.954382	0.963138	0.93173	0.998619	0.998815	0.997826	0.997505	0.998185	0.999411	0.997144	0.998613	-0.998594	0.999662	0.999044	0.996252	0.997374	0.996814	-0.998507	-0.995979	-0.998008	-0.997175	0.995028	1

## Sheet: catkin group P_M
	A0A2I4GEI2	A0A2I4GR72	A0A2I4HMQ2	A0A2I4G145	A0A2I4EEB5	A0A2I4EMI1	A0A2I4FWH9	A0A6P9ENN3	A0A2I4DXM6	A0A833XCG4	A0A2I4F1R5	A0A2I4DE51	A0A2I4DR18	A0A2I4GZL4	A0A2I4GV50	A0A2I4DHB7	A0A2I4GS51	A0A2I4DLU5	A0A1L6K371	A0A2I4EKJ9
Cinnamic acid	0.955711	-0.954963	-0.948246	0.954188	-0.949236	-0.957698	-0.952652	-0.952236	0.939719	0.968109	0.943687	0.944806	-0.963046	-0.955293	-0.965573	-0.953286	-0.925226	-0.933896	0.966087	-0.981419
Bergapten	0.907521	-0.917446	-0.893037	0.911719	-0.911003	-0.902304	-0.89194	-0.917981	0.894237	0.920407	0.89602	0.892073	-0.901317	-0.891918	-0.888316	-0.910131	-0.886816	-0.859349	0.943677	-0.952607
Coixinden B	0.901368	-0.903949	-0.90065	0.896888	-0.902842	-0.885446	-0.894462	-0.909165	0.898899	0.889197	0.887359	0.906608	-0.856565	-0.874025	-0.864923	-0.859788	-0.902081	-0.887884	0.865038	-0.90516
3-[(3-Methylbutyl)nitrosoamino]-2-butanone	0.858444	-0.857654	-0.871599	0.850341	-0.85594	-0.851187	-0.860312	-0.867298	0.878316	0.859909	0.890644	0.875864	-0.867668	-0.839621	-0.857489	-0.843723	-0.850771	-0.831655	0.832595	-0.816325
4-Hydroxycitrulline	-0.797162	0.799969	0.805889	-0.799329	0.802512	0.800995	0.798445	0.804108	-0.821505	-0.80063	-0.836051	-0.805581	0.827287	0.797346	0.801282	0.822281	0.806398	0.777272	-0.807173	0.740739
Physoperuvine	-0.851876	0.863943	0.842069	-0.866811	0.868882	0.855447	0.84064	0.860894	-0.859764	-0.849008	-0.857211	-0.839742	0.852631	0.855007	0.823873	0.888939	0.8788	0.834743	-0.894372	0.834476
L-Asparagine	-0.854128	0.864041	0.852619	-0.863239	0.871328	0.847162	0.84512	0.866329	-0.87053	-0.836051	-0.86008	-0.856197	0.825954	0.842022	0.807367	0.859261	0.894085	0.848324	-0.852832	0.815816
Eremopetasitenin D1	-0.861938	0.862176	0.859008	-0.874454	0.872414	0.875174	0.865755	0.852561	-0.868	-0.848516	-0.859679	-0.853683	0.866508	0.888515	0.857245	0.897022	0.896747	0.893953	-0.870451	0.810289
Capsiamide	-0.865954	0.863966	0.875709	-0.870752	0.874253	0.871606	0.873539	0.862453	-0.888387	-0.848034	-0.885286	-0.875447	0.868479	0.87784	0.85872	0.881556	0.902894	0.892487	-0.843322	0.784039
6'''-O-Sinapoylsaponarin	-0.880161	0.892705	0.876129	-0.885715	0.892601	0.870609	0.865988	0.898766	-0.891951	-0.87925	-0.893205	-0.8796	0.867825	0.857434	0.842518	0.884696	0.891728	0.838314	-0.899463	0.872847
3,6,7-Trihydroxy-4'-methoxyflavone 7-rhamnoside	-0.880971	0.875199	0.890907	-0.869704	0.869542	0.878525	0.886137	0.881137	-0.88618	-0.891741	-0.90116	-0.891846	0.900891	0.87052	0.901897	0.863917	0.849362	0.856303	-0.857566	0.862968
Adenosine	-0.893087	0.895591	0.898421	-0.886853	0.895548	0.87531	0.887843	0.904237	-0.901322	-0.878824	-0.893313	-0.906248	0.851911	0.86148	0.855551	0.850264	0.899504	0.877282	-0.848347	0.876234
a-L-Arabinofuranosyl-(1->3)-[a-L-arabinofuranosyl-(1r5)]-L-arabinose	-0.904196	0.90786	0.910402	-0.896938	0.904115	0.889438	0.898148	0.918457	-0.915376	-0.903811	-0.920346	-0.916691	0.88964	0.872685	0.882352	0.875192	0.894558	0.865964	-0.880767	0.892001
3-Ethyl-1,2-benzenediol	-0.914543	0.923756	0.909314	-0.924661	0.928317	0.913961	0.905855	0.923168	-0.924087	-0.907794	-0.920242	-0.909199	0.906651	0.911271	0.88534	0.934192	0.938957	0.900885	-0.934209	0.890468
Ureidopropionic acid	-0.914904	0.917171	0.922352	-0.91398	0.922148	0.904844	0.913423	0.92272	-0.932016	-0.896687	-0.924861	-0.927871	0.887039	0.897761	0.882498	0.895226	0.939399	0.91448	-0.878449	0.867206
Ethiin	-0.922149	0.915881	0.930553	-0.92364	0.923614	0.929799	0.932644	0.912159	-0.934201	-0.908489	-0.931318	-0.928632	0.927214	0.938165	0.928224	0.930262	0.942942	0.952827	-0.893474	0.855262
5-Hydroxymethyl-2-furancarboxaldehyde	-0.922255	0.921931	0.930665	-0.92277	0.925834	0.923975	0.925692	0.924286	-0.940549	-0.917211	-0.946096	-0.931098	0.933339	0.922512	0.920526	0.931034	0.934741	0.919136	-0.91001	0.866357
Dihydrozeatin	-0.945792	0.949357	0.942998	-0.953226	0.955584	0.946375	0.94301	0.946401	-0.951206	-0.93222	-0.941566	-0.94264	0.929243	0.948337	0.921886	0.953618	0.971566	0.954475	-0.941687	0.913888
5-Hydroxymaltol	-0.969302	0.974389	0.968646	-0.97105	0.97572	0.962182	0.962984	0.977525	-0.975944	-0.9623	-0.972249	-0.971318	0.951364	0.954731	0.942508	0.961093	0.978824	0.95261	-0.961107	0.951954
Sugiol	-0.989612	0.98806	0.990824	-0.991107	0.991248	0.991624	0.991767	0.98593	-0.992477	-0.982519	-0.989165	-0.989791	0.985348	0.993413	0.984737	0.990025	0.997007	0.996487	-0.9752	0.959077

## Sheet: catkin group PM
	A0A2I4GEI2	A0A2I4GR72	A0A2I4HMQ2	A0A2I4G145	A0A2I4EEB5	A0A2I4EMI1	A0A2I4FWH9	A0A6P9ENN3	A0A2I4DXM6	A0A833XCG4	A0A2I4F1R5	A0A2I4DE51	A0A2I4DR18	A0A2I4GZL4	A0A2I4GV50	A0A2I4DHB7	A0A2I4GS51	A0A2I4DLU5	A0A1L6K371	A0A2I4EKJ9	Sugiol	5-Hydroxymaltol	Cinnamic acid	3-Ethyl-1,2-benzenediol	Dihydrozeatin	5-Hydroxymethyl-2-furancarboxaldehyde	Ethiin	Ureidopropionic acid	Coixinden B	3,6,7-Trihydroxy-4'-methoxyflavone 7-rhamnoside	Physoperuvine	6'''-O-Sinapoylsaponarin	Capsiamide	Bergapten	L-Asparagine	Eremopetasitenin D1	Adenosine	4-Hydroxycitrulline	3-[(3-Methylbutyl)nitrosoamino]-2-butanone	a-L-Arabinofuranosyl-(1->3)-[a-L-arabinofuranosyl-(1r5)]-L-arabinose
A0A2I4GEI2	1	-0.999522	-0.999225	0.999468	-0.999337	-0.999168	-0.99926	-0.998992	0.998379	0.998536	0.997413	0.998705	-0.995309	-0.997005	-0.995159	-0.994124	-0.994981	-0.9928	0.990005	-0.988113	-0.989612	-0.969302	0.955711	-0.914543	-0.945792	-0.922255	-0.922149	-0.914904	0.901368	-0.880971	-0.851876	-0.880161	-0.865954	0.907521	-0.854128	-0.861938	-0.893087	-0.797162	0.858444	-0.904196
A0A2I4GR72	-0.999522	1	0.997999	-0.999587	0.999715	0.998257	0.997665	0.999656	-0.997996	-0.99836	-0.996984	-0.997586	0.994177	0.995484	0.992495	0.994645	0.995114	0.989829	-0.99249	0.989586	0.98806	0.974389	-0.954963	0.923756	0.949357	0.921931	0.915881	0.917171	-0.903949	0.875199	0.863943	0.892705	0.863966	-0.917446	0.864041	0.862176	0.895591	0.799969	-0.857654	0.90786
A0A2I4HMQ2	-0.999225	0.997999	1	-0.997881	0.9981	0.998148	0.999554	0.997933	-0.999171	-0.996806	-0.998442	-0.999821	0.994578	0.995974	0.995207	0.991544	0.994934	0.993857	-0.984747	0.982658	0.990824	0.968646	-0.948246	0.909314	0.942998	0.930665	0.930553	0.922352	-0.90065	0.890907	0.842069	0.876129	0.875709	-0.893037	0.852619	0.859008	0.898421	0.805889	-0.871599	0.910402
A0A2I4G145	0.999468	-0.999587	-0.997881	1	-0.99976	-0.999244	-0.998231	-0.998565	0.997819	0.997898	0.996502	0.997057	-0.995138	-0.997578	-0.993696	-0.996504	-0.996238	-0.992536	0.992798	-0.987656	-0.991107	-0.97105	0.954188	-0.924661	-0.953226	-0.92277	-0.92364	-0.91398	0.896888	-0.869704	-0.866811	-0.885715	-0.870752	0.911719	-0.863239	-0.874454	-0.886853	-0.799329	0.850341	-0.896938
A0A2I4EEB5	-0.999337	0.999715	0.9981	-0.99976	1	0.998409	0.997853	0.999148	-0.998568	-0.997125	-0.997047	-0.997656	0.993662	0.996202	0.991881	0.995297	0.997152	0.991859	-0.991492	0.986428	0.991248	0.97572	-0.949236	0.928317	0.955584	0.925834	0.923614	0.922148	-0.902842	0.869542	0.868882	0.892601	0.874253	-0.911003	0.871328	0.872414	0.895548	0.802512	-0.85594	0.904115
A0A2I4EMI1	-0.999168	0.998257	0.998148	-0.999244	0.998409	1	0.999175	0.996807	-0.997145	-0.998109	-0.996454	-0.996908	0.997389	0.999245	0.997107	0.996736	0.994469	0.994416	-0.991251	0.985852	0.991624	0.962182	-0.957698	0.913961	0.946375	0.923975	0.929799	0.904844	-0.885446	0.878525	0.855447	0.870609	0.871606	-0.902304	0.847162	0.875174	0.87531	0.800995	-0.851187	0.889438
A0A2I4FWH9	-0.99926	0.997665	0.999554	-0.998231	0.997853	0.999175	1	0.996855	-0.998104	-0.997129	-0.997196	-0.998872	0.995727	0.997963	0.996991	0.993053	0.994544	0.995698	-0.985862	0.983411	0.991767	0.962984	-0.952652	0.905855	0.94301	0.925692	0.932644	0.913423	-0.894462	0.886137	0.84064	0.865988	0.873539	-0.89194	0.84512	0.865755	0.887843	0.798445	-0.860312	0.898148
A0A6P9ENN3	-0.998992	0.999656	0.997933	-0.998565	0.999148	0.996807	0.996855	1	-0.998176	-0.997796	-0.997435	-0.997962	0.992771	0.993125	0.990874	0.992317	0.994224	0.987542	-0.990656	0.989003	0.98593	0.977525	-0.952236	0.923168	0.946401	0.924286	0.912159	0.92272	-0.909165	0.881137	0.860894	0.898766	0.862453	-0.917981	0.866329	0.852561	0.904237	0.804108	-0.867298	0.918457
A0A2I4DXM6	0.998379	-0.997996	-0.999171	0.997819	-0.998568	-0.997145	-0.998104	-0.998176	1	0.995338	0.999236	0.999169	-0.993568	-0.994709	-0.99206	-0.992676	-0.996972	-0.992182	0.985773	-0.979349	-0.992477	-0.975944	0.939719	-0.924087	-0.951206	-0.940549	-0.934201	-0.932016	0.898899	-0.88618	-0.859764	-0.891951	-0.888387	0.894237	-0.87053	-0.868	-0.901322	-0.821505	0.878316	-0.915376
A0A833XCG4	0.998536	-0.99836	-0.996806	0.997898	-0.997125	-0.998109	-0.997129	-0.997796	0.995338	1	0.996008	0.995851	-0.997173	-0.995453	-0.996151	-0.994219	-0.989072	-0.986932	0.993393	-0.992352	-0.982519	-0.9623	0.968109	-0.907794	-0.93222	-0.917211	-0.908489	-0.896687	0.889197	-0.891741	-0.849008	-0.87925	-0.848034	0.920407	-0.836051	-0.848516	-0.878824	-0.80063	0.859909	-0.903811
A0A2I4F1R5	0.997413	-0.996984	-0.998442	0.996502	-0.997047	-0.996454	-0.997196	-0.997435	0.999236	0.996008	1	0.998295	-0.9956	-0.993652	-0.993256	-0.99267	-0.993682	-0.988773	0.986531	-0.97909	-0.989165	-0.972249	0.943687	-0.920242	-0.941566	-0.946096	-0.931318	-0.924861	0.887359	-0.90116	-0.857211	-0.893205	-0.885286	0.89602	-0.86008	-0.859679	-0.893313	-0.836051	0.890644	-0.920346
A0A2I4DE51	0.998705	-0.997586	-0.999821	0.997057	-0.997656	-0.996908	-0.998872	-0.997962	0.999169	0.995851	0.998295	1	-0.992765	-0.994178	-0.993472	-0.989459	-0.994712	-0.992737	0.982722	-0.981747	-0.989791	-0.971318	0.944806	-0.909199	-0.94264	-0.931098	-0.928632	-0.927871	0.906608	-0.891846	-0.839742	-0.8796	-0.875447	0.892073	-0.856197	-0.853683	-0.906248	-0.805581	0.875864	-0.916691
A0A2I4DR18	-0.995309	0.994177	0.994578	-0.995138	0.993662	0.997389	0.995727	0.992771	-0.993568	-0.997173	-0.9956	-0.992765	1	0.996666	0.998078	0.996301	0.987046	0.98753	-0.991458	0.982341	0.985348	0.951364	-0.963046	0.906651	0.929243	0.933339	0.927214	0.887039	-0.856565	0.900891	0.852631	0.867825	0.868479	-0.901317	0.825954	0.866508	0.851911	0.827287	-0.867668	0.88964
A0A2I4GZL4	-0.997005	0.995484	0.995974	-0.997578	0.996202	0.999245	0.997963	0.993125	-0.994709	-0.995453	-0.993652	-0.994178	0.996666	1	0.996967	0.996862	0.993568	0.996105	-0.989208	0.981269	0.993413	0.954731	-0.955293	0.911271	0.948337	0.922512	0.938165	0.897761	-0.874025	0.87052	0.855007	0.857434	0.87784	-0.891918	0.842022	0.888515	0.86148	0.797346	-0.839621	0.872685
A0A2I4GV50	-0.995159	0.992495	0.995207	-0.993696	0.991881	0.997107	0.996991	0.990874	-0.99206	-0.996151	-0.993256	-0.993472	0.998078	0.996967	1	0.991801	0.985136	0.991247	-0.984941	0.982076	0.984737	0.942508	-0.965573	0.88534	0.921886	0.920526	0.928224	0.882498	-0.864923	0.901897	0.823873	0.842518	0.85872	-0.888316	0.807367	0.857245	0.855551	0.801282	-0.857489	0.882352
A0A2I4DHB7	-0.994124	0.994645	0.991544	-0.996504	0.995297	0.996736	0.993053	0.992317	-0.992676	-0.994219	-0.99267	-0.989459	0.996301	0.996862	0.991801	1	0.992081	0.98786	-0.99587	0.980676	0.990025	0.961093	-0.953286	0.934192	0.953618	0.931034	0.930262	0.895226	-0.859788	0.863917	0.888939	0.884696	0.881556	-0.910131	0.859261	0.897022	0.850264	0.822281	-0.843723	0.875192
A0A2I4GS51	-0.994981	0.995114	0.994934	-0.996238	0.997152	0.994469	0.994544	0.994224	-0.996972	-0.989072	-0.993682	-0.994712	0.987046	0.993568	0.985136	0.992081	1	0.994039	-0.983159	0.972534	0.997007	0.978824	-0.925226	0.938957	0.971566	0.934741	0.942942	0.939399	-0.902081	0.849362	0.8788	0.891728	0.902894	-0.886816	0.894085	0.896747	0.899504	0.806398	-0.850771	0.894558
A0A2I4DLU5	-0.9928	0.989829	0.993857	-0.992536	0.991859	0.994416	0.995698	0.987542	-0.992182	-0.986932	-0.988773	-0.992737	0.98753	0.996105	0.991247	0.98786	0.994039	1	-0.974261	0.968641	0.996487	0.95261	-0.933896	0.900885	0.954475	0.919136	0.952827	0.91448	-0.887884	0.856303	0.834743	0.838314	0.892487	-0.859349	0.848324	0.893953	0.877282	0.777272	-0.831655	0.865964
A0A1L6K371	0.990005	-0.99249	-0.984747	0.992798	-0.991492	-0.991251	-0.985862	-0.990656	0.985773	0.993393	0.986531	0.982722	-0.991458	-0.989208	-0.984941	-0.99587	-0.983159	-0.974261	1	-0.989438	-0.9752	-0.961107	0.966087	-0.934209	-0.941687	-0.91001	-0.893474	-0.878449	0.865038	-0.857566	-0.894372	-0.899463	-0.843322	0.943677	-0.852832	-0.870451	-0.848347	-0.807173	0.832595	-0.880767
A0A2I4EKJ9	-0.988113	0.989586	0.982658	-0.987656	0.986428	0.985852	0.983411	0.989003	-0.979349	-0.992352	-0.97909	-0.981747	0.982341	0.981269	0.982076	0.980676	0.972534	0.968641	-0.989438	1	0.959077	0.951954	-0.981419	0.890468	0.913888	0.866357	0.855262	0.867206	-0.90516	0.862968	0.834476	0.872847	0.784039	-0.952607	0.815816	0.810289	0.876234	0.740739	-0.816325	0.892001
Sugiol	-0.989612	0.98806	0.990824	-0.991107	0.991248	0.991624	0.991767	0.98593	-0.992477	-0.982519	-0.989165	-0.989791	0.985348	0.993413	0.984737	0.990025	0.997007	0.996487	-0.9752	0.959077	1	0.963299	-0.915312	0.929228	0.970194	0.940561	0.964117	0.929927	-0.876061	0.846206	0.870342	0.86498	0.921632	-0.856434	0.880787	0.917074	0.875076	0.811608	-0.843322	0.869553
5-Hydroxymaltol	-0.969302	0.974389	0.968646	-0.97105	0.97572	0.962182	0.962984	0.977525	-0.975944	-0.9623	-0.972249	-0.971318	0.951364	0.954731	0.942508	0.961093	0.978824	0.95261	-0.961107	0.951954	0.963299	1	-0.879105	0.961658	0.96354	0.924711	0.885931	0.96858	-0.929654	0.820758	0.90101	0.956283	0.878998	-0.904871	0.943911	0.843576	0.943089	0.813114	-0.868562	0.939398
Cinnamic acid	0.955711	-0.954963	-0.948246	0.954188	-0.949236	-0.957698	-0.952652	-0.952236	0.939719	0.968109	0.943687	0.944806	-0.963046	-0.955293	-0.965573	-0.953286	-0.925226	-0.933896	0.966087	-0.981419	-0.915312	-0.879105	1	-0.814066	-0.839113	-0.812928	-0.807807	-0.763829	0.82651	-0.869567	-0.76809	-0.79155	-0.706086	0.936727	-0.69927	-0.760006	-0.781758	-0.700902	0.770685	-0.828572
3-Ethyl-1,2-benzenediol	-0.914543	0.923756	0.909314	-0.924661	0.928317	0.913961	0.905855	0.923168	-0.924087	-0.907794	-0.920242	-0.909199	0.906651	0.911271	0.88534	0.934192	0.938957	0.900885	-0.934209	0.890468	0.929228	0.961658	-0.814066	1	0.969653	0.912798	0.871157	0.915038	-0.817666	0.715103	0.983844	0.959952	0.899934	-0.877464	0.968458	0.909228	0.831222	0.83974	-0.793881	0.842295
Dihydrozeatin	-0.945792	0.949357	0.942998	-0.953226	0.955584	0.946375	0.94301	0.946401	-0.951206	-0.93222	-0.941566	-0.94264	0.929243	0.948337	0.921886	0.953618	0.971566	0.954475	-0.941687	0.913888	0.970194	0.96354	-0.839113	0.969653	1	0.89749	0.927077	0.938133	-0.875708	0.711278	0.928915	0.891465	0.920381	-0.8445	0.95414	0.946432	0.867505	0.761812	-0.757639	0.818724
5-Hydroxymethyl-2-furancarboxaldehyde	-0.922255	0.921931	0.930665	-0.92277	0.925834	0.923975	0.925692	0.924286	-0.940549	-0.917211	-0.946096	-0.931098	0.933339	0.922512	0.920526	0.931034	0.934741	0.919136	-0.91001	0.866357	0.940561	0.924711	-0.812928	0.912798	0.89749	1	0.947272	0.918326	-0.754558	0.890772	0.861487	0.887734	0.957098	-0.767923	0.862639	0.858704	0.818807	0.955449	-0.944664	0.89501
Ethiin	-0.922149	0.915881	0.930553	-0.92364	0.923614	0.929799	0.932644	0.912159	-0.934201	-0.908489	-0.931318	-0.928632	0.927214	0.938165	0.928224	0.930262	0.942942	0.952827	-0.893474	0.855262	0.964117	0.885931	-0.807807	0.871157	0.927077	0.947272	1	0.895604	-0.759569	0.809531	0.812231	0.769308	0.973275	-0.698149	0.83181	0.93503	0.786221	0.8333	-0.824997	0.783654
Ureidopropionic acid	-0.914904	0.917171	0.922352	-0.91398	0.922148	0.904844	0.913423	0.92272	-0.932016	-0.896687	-0.924861	-0.927871	0.887039	0.897761	0.882498	0.895226	0.939399	0.91448	-0.878449	0.867206	0.929927	0.96858	-0.763829	0.915038	0.938133	0.918326	0.895604	1	-0.917274	0.779289	0.830267	0.90688	0.911804	-0.774128	0.947686	0.814372	0.960635	0.793819	-0.870385	0.922913
Coixinden B	0.901368	-0.903949	-0.90065	0.896888	-0.902842	-0.885446	-0.894462	-0.909165	0.898899	0.889197	0.887359	0.906608	-0.856565	-0.874025	-0.864923	-0.859788	-0.902081	-0.887884	0.865038	-0.90516	-0.876061	-0.929654	0.82651	-0.817666	-0.875708	-0.754558	-0.759569	-0.917274	1	-0.723247	-0.717871	-0.833027	-0.713401	0.845294	-0.847158	-0.68617	-0.979031	-0.568027	0.739307	-0.889366
3,6,7-Trihydroxy-4'-methoxyflavone 7-rhamnoside	-0.880971	0.875199	0.890907	-0.869704	0.869542	0.878525	0.886137	0.881137	-0.88618	-0.891741	-0.90116	-0.891846	0.900891	0.87052	0.901897	0.863917	0.849362	0.856303	-0.857566	0.862968	0.846206	0.820758	-0.869567	0.715103	0.711278	0.890772	0.809531	0.779289	-0.723247	1	0.632984	0.757838	0.746305	-0.761345	0.620564	0.61982	0.773942	0.851639	-0.952166	0.905386
Physoperuvine	-0.851876	0.863943	0.842069	-0.866811	0.868882	0.855447	0.84064	0.860894	-0.859764	-0.849008	-0.857211	-0.839742	0.852631	0.855007	0.823873	0.888939	0.8788	0.834743	-0.894372	0.834476	0.870342	0.90101	-0.76809	0.983844	0.928915	0.861487	0.812231	0.830267	-0.717871	0.632984	1	0.930505	0.854104	-0.856372	0.932353	0.903125	0.723448	0.819066	-0.714251	0.753632
6'''-O-Sinapoylsaponarin	-0.880161	0.892705	0.876129	-0.885715	0.892601	0.870609	0.865988	0.898766	-0.891951	-0.87925	-0.893205	-0.8796	0.867825	0.857434	0.842518	0.884696	0.891728	0.838314	-0.899463	0.872847	0.86498	0.956283	-0.79155	0.959952	0.891465	0.887734	0.769308	0.90688	-0.833027	0.757838	0.930505	1	0.811492	-0.899736	0.937291	0.76071	0.869647	0.84759	-0.853878	0.920372
Capsiamide	-0.865954	0.863966	0.875709	-0.870752	0.874253	0.871606	0.873539	0.862453	-0.888387	-0.848034	-0.885286	-0.875447	0.868479	0.87784	0.85872	0.881556	0.902894	0.892487	-0.843322	0.784039	0.921632	0.878998	-0.706086	0.899934	0.920381	0.957098	0.973275	0.911804	-0.713401	0.746305	0.854104	0.811492	1	-0.650612	0.887361	0.929016	0.770572	0.878742	-0.829559	0.776609
Bergapten	0.907521	-0.917446	-0.893037	0.911719	-0.911003	-0.902304	-0.89194	-0.917981	0.894237	0.920407	0.89602	0.892073	-0.901317	-0.891918	-0.888316	-0.910131	-0.886816	-0.859349	0.943677	-0.952607	-0.856434	-0.904871	0.936727	-0.877464	-0.8445	-0.767923	-0.698149	-0.774128	0.845294	-0.761345	-0.856372	-0.899736	-0.650612	1	-0.790506	-0.715856	-0.803554	-0.685024	0.730371	-0.846624
L-Asparagine	-0.854128	0.864041	0.852619	-0.863239	0.871328	0.847162	0.84512	0.866329	-0.87053	-0.836051	-0.86008	-0.856197	0.825954	0.842022	0.807367	0.859261	0.894085	0.848324	-0.852832	0.815816	0.880787	0.943911	-0.69927	0.968458	0.95414	0.862639	0.83181	0.947686	-0.847158	0.620564	0.932353	0.937291	0.887361	-0.790506	1	0.860793	0.873716	0.76307	-0.750193	0.826276
Eremopetasitenin D1	-0.861938	0.862176	0.859008	-0.874454	0.872414	0.875174	0.865755	0.852561	-0.868	-0.848516	-0.859679	-0.853683	0.866508	0.888515	0.857245	0.897022	0.896747	0.893953	-0.870451	0.810289	0.917074	0.843576	-0.760006	0.909228	0.946432	0.858704	0.93503	0.814372	-0.68617	0.61982	0.903125	0.76071	0.929016	-0.715856	0.860793	1	0.673936	0.749403	-0.648885	0.641712
Adenosine	-0.893087	0.895591	0.898421	-0.886853	0.895548	0.87531	0.887843	0.904237	-0.901322	-0.878824	-0.893313	-0.906248	0.851911	0.86148	0.855551	0.850264	0.899504	0.877282	-0.848347	0.876234	0.875076	0.943089	-0.781758	0.831222	0.867505	0.818807	0.786221	0.960635	-0.979031	0.773942	0.723448	0.869647	0.770572	-0.803554	0.873716	0.673936	1	0.665549	-0.830693	0.942391
4-Hydroxycitrulline	-0.797162	0.799969	0.805889	-0.799329	0.802512	0.800995	0.798445	0.804108	-0.821505	-0.80063	-0.836051	-0.805581	0.827287	0.797346	0.801282	0.822281	0.806398	0.777272	-0.807173	0.740739	0.811608	0.813114	-0.700902	0.83974	0.761812	0.955449	0.8333	0.793819	-0.568027	0.851639	0.819066	0.84759	0.878742	-0.685024	0.76307	0.749403	0.665549	1	-0.928785	0.825507
3-[(3-Methylbutyl)nitrosoamino]-2-butanone	0.858444	-0.857654	-0.871599	0.850341	-0.85594	-0.851187	-0.860312	-0.867298	0.878316	0.859909	0.890644	0.875864	-0.867668	-0.839621	-0.857489	-0.843723	-0.850771	-0.831655	0.832595	-0.816325	-0.843322	-0.868562	0.770685	-0.793881	-0.757639	-0.944664	-0.824997	-0.870385	0.739307	-0.952166	-0.714251	-0.853878	-0.829559	0.730371	-0.750193	-0.648885	-0.830693	-0.928785	1	-0.951658
a-L-Arabinofuranosyl-(1->3)-[a-L-arabinofuranosyl-(1r5)]-L-arabinose	-0.904196	0.90786	0.910402	-0.896938	0.904115	0.889438	0.898148	0.918457	-0.915376	-0.903811	-0.920346	-0.916691	0.88964	0.872685	0.882352	0.875192	0.894558	0.865964	-0.880767	0.892001	0.869553	0.939398	-0.828572	0.842295	0.818724	0.89501	0.783654	0.922913	-0.889366	0.905386	0.753632	0.920372	0.776609	-0.846624	0.826276	0.641712	0.942391	0.825507	-0.951658	1
