# Supplementary material for: Multi-omics research on common allergens during the ripening of pollen and poplar flocs of Populus deltoides
Source: Front Plant Sci. 2023 Jun 16;14:1136613. doi: 10.3389/fpls.2023.1136613 (PMC10313134; doi:10.3389/fpls.2023.1136613)
Supplement: Supplementary file 5 [file Table_5.xlsx]

## Sheet: cornetwork
name

## Sheet: cornetwork-node
name
